# Supplementary material for: Co-overexpression of AtSAT1 and EcPAPR improves seed nutritional value in maize
Source: Front Plant Sci. 2022 Sep 15;13:969763. doi: 10.3389/fpls.2022.969763 (PMC9520583; doi:10.3389/fpls.2022.969763)
Supplement: Supplementary file 2 [file Data_Sheet_2.xlsx]

## Sheet: Table S1
Supplemental Table 1. Summary of RNA-seq read mapping results for leaves and 18 DAP endosperm samples
Sample	Leaves										18 DAP endosperm
	Null L_1	Null L_2	Null L_3	pRbcS:AtSAT1 L_1	pRbcS:AtSAT1 L_2	pRbcS:AtSAT1 L_3	pRbcS:AtSAT1-pRbcS:EcPAPR-OE L_1	pRbcS:AtSAT1-pRbcS:EcPAPR L_2	pRbcS:AtSAT1-pRbcS:EcPAPR L_3		Null En_1	Null En_2	Null En_3	pRbcS:AtSAT1 En_1	pRbcS:AtSAT1 En_2	pRbcS:AtSAT1 En_3	pRbcS:AtSAT1-pRbcS:EcPAPR-OE En_1	pRbcS:AtSAT1-pRbcS:EcPAPR-OE En_2	pRbcS:AtSAT1-pRbcS:EcPAPR-OE En_3
Total reads	43488972	45423006	47909670	49842704	46769618	48456528	52296244	43826858	54280970		46407668	43787378	50930528	49218068	47405314	55920326	51009646	52758476	50314840
Total mapped	34920334	36927620	38978204	40342204	37720917	38788362	42611436	35454466	43990228		38353825	37270286	42752976	39927883	40896390	46101642	41601949	42845747	41305011
	-0.803	-0.813	-0.8136	-0.8094	-0.8065	-0.8005	-0.8148	-0.809	-0.8104		-0.8265	-0.8512	-0.8394	-0.8112	-0.8627	-0.8244	-0.8156	-0.8121	-0.8209
Multiple mapped	2309201	2457637	2576305	2669822	2492713	2640354	3118167	2516957	3241474		2209170	2068662	2437796	2126771	2271398	2795645	2383358	2380627	2382719
	-0.0531	-0.0541	-0.0538	-0.0536	-0.0533	-0.0545	-0.0596	-0.0574	-0.0597		-0.0476	-0.0472	-0.0479	-0.0432	-0.0479	-0.05	-0.0467	-0.0451	-0.0474
Uniquely mapped	32611133	34469983	36401899	37672382	35228204	36148008	39493269	32937509	40748754		36144655	35201624	40315180	37801112	38624992	43305997	39218591	40465120	38922292
	-0.7499	-0.7589	-0.7598	-0.7558	-0.7532	-0.746	-0.7552	-0.7515	-0.7507		-0.7789	-0.8039	-0.7916	-0.768	-0.8148	-0.7744	-0.7688	-0.767	-0.7736
Read-1	16480723	17505847	18409010	19118345	17804046	18323648	19953799	16673864	20603400		18294524	17774066	20366224	19051522	19520382	21901917	19785291	20457223	19686066
	-0.379	-0.3854	-0.3842	-0.3836	-0.3807	-0.3781	-0.3816	-0.3804	-0.3796		-0.3942	-0.4059	-0.3999	-0.3871	-0.4118	-0.3917	-0.3879	-0.3878	-0.3913
Read-2	16130410	16964136	17992889	18554037	17424158	17824360	19539470	16263645	20145354		17850131	17427558	19948956	18749590	19104610	21404080	19433300	20007897	19236226
	-0.3709	-0.3735	-0.3756	-0.3723	-0.3726	-0.3678	-0.3736	-0.3711	-0.3711		-0.3846	-0.398	-0.3917	-0.3809	-0.403	-0.3828	-0.381	-0.3792	-0.3823
Reads map to '+'	16323830	17247911	18213392	18850594	17622802	18083312	19759225	16478007	20381866		18002809	17552541	20100666	18852433	19253839	21584124	19561337	20151329	19398229
	-0.3754	-0.3797	-0.3802	-0.3782	-0.3768	-0.3732	-0.3778	-0.376	-0.3755		-0.3879	-0.4009	-0.3947	-0.383	-0.4062	-0.386	-0.3835	-0.382	-0.3855
Reads map to '-'	16287303	17222072	18188507	18821788	17605402	18064696	19734044	16459502	20366888		18141846	17649083	20214514	18948679	19371153	21721873	19657254	20313791	19524063
	-0.3745	-0.3791	-0.3796	-0.3776	-0.3764	-0.3728	-0.3774	-0.3756	-0.3752		-0.3909	-0.4031	-0.3969	-0.385	-0.4086	-0.3884	-0.3854	-0.385	-0.388
Non-splice reads	18236658	19252584	20499969	20578440	19454376	19995888	22945416	19305576	23209307		27792808	26587255	30213527	29529625	28598638	32453064	29300536	32290273	29035813
	-0.4193	-0.4239	-0.4279	-0.4129	-0.416	-0.4127	-0.4388	-0.4405	-0.4276		-0.5989	-0.6072	-0.5932	-0.6	-0.6033	-0.5803	-0.5744	-0.612	-0.5771
Splice reads	14374475	15217399	15901930	17093942	15773828	16152120	16547853	13631933	17539447		8351847	8614369	10101653	8271487	10026354	10852933	9918055	8174847	9886479
	-0.3305	-0.335	-0.3319	-0.343	-0.3373	-0.3333	-0.3164	-0.311	-0.3231		-0.18	-0.1967	-0.1983	-0.1681	-0.2115	-0.1941	-0.1944	-0.1549	-0.1965
Reads mapped in proper pairs	30620672	32190264	34136904	35089206	32990144	33715346	37038272	30922316	38214218		33950904	33361384	38158254	35810906	36955708	41244318	37162206	38540682	36664212
	-0.7041	-0.7087	-0.7125	-0.704	-0.7054	-0.6958	-0.7082	-0.7056	-0.704		-0.7316	-0.7619	-0.7492	-0.7276	-0.7796	-0.7376	-0.7285	-0.7305	-0.7287

## Sheet: Table S2
Supplemental Table 2. List of Up- and Down-regulated genes in pRbcS:AtSAT1 mature leaves.
Gene ID （v4）	Gene ID (v3)	baseMean	baseMean_control_ Null_L	baseMean_case_ pRbcS:AtSAT1 _L	foldChange	log2FoldChange	pval	up_down	fpkm_ Null_L_1	fpkm_ Null_L_2	fpkm_ Null_L_3	fpkm_ pRbcS:AtSAT1 _L_1	fpkm_ pRbcS:AtSAT1 _L_2	fpkm_ pRbcS:AtSAT1 _L_3	description	GO_id	GO_term											GRMZM2G090338		Zm00001d027285	GRMZM2G161483	GRMZM2G703462
Zm00001d023617	GRMZM2G094375	239.306	2.68456	475.927	177.283	0.00214756	0.0414652	Up	0.119612	0	0.17171	41.6704	6.36013	7.80069		GO:0016491,GO:0005507,GO:0048046,GO:0052716,GO:0046274,GO:0055114	oxidoreductase activity|copper ion binding|apoplast|hydroquinone:oxygen oxidoreductase activity|lignin catabolic process|oxidation-reduction process											GRMZM2G169329		Zm00001d027286	AC193500.3_FG003	GRMZM2G161483
Zm00001d024980	#N/A	143.056	1.65323	284.459	172.062	2.59852e-53	7.21479e-49	Up	0.0744154	0.0710731	0.1978	22.1127	20.1225	16.8401		GO:0015977,GO:0003824,GO:0006099,GO:0008964	carbon fixation|catalytic activity|tricarboxylic acid cycle|phosphoenolpyruvate carboxylase activity											GRMZM2G370852		Zm00001d027287	GRMZM2G161540	AC193500.3_FG003
Zm00001d052243	GRMZM2G169033	124.128	1.74613	246.511	141.176	0.00212699	0.0412114	Up	0.0768014	0	0.0455148	13.9999	2.27374	2.63533		GO:0016491,GO:0005507,GO:0048046,GO:0052716,GO:0046274,GO:0055114	oxidoreductase activity|copper ion binding|apoplast|hydroquinone:oxygen oxidoreductase activity|lignin catabolic process|oxidation-reduction process											GRMZM2G422750		Zm00001d027288	GRMZM2G161560	GRMZM2G161540
Zm00001d041726	GRMZM2G110369	1311.07	19.1253	2603.02	136.103	2.84994e-10	5.86139e-08	Up	0.183092	0.175497	2.10089	187.528	70.6059	78.8627		GO:0046872,GO:0016491,GO:0055114	metal ion binding|oxidoreductase activity|oxidation-reduction process											#N/A		Zm00001d027290	GRMZM2G379898	GRMZM2G161560
Zm00001d038814	GRMZM2G334658	54.3091	0.938428	107.68	114.745	0.00173339	0.0354139	Up	0	0	0	9.33353	2.48061	1.7729														GRMZM2G000236		na	AC155352.2_FG010	GRMZM2G379898
Zm00001d043651	GRMZM2G181135	193.171	3.39936	382.943	112.651	7.37396e-05	0.0032141	Up	0.117232	0.0373695	0.136379	22.8285	6.58726	5.99535		GO:0016021,GO:0003824,GO:0016846	integral component of membrane|catalytic activity|carbon-sulfur lyase activity											GRMZM2G474119		Zm00001d027292	GRMZM2G060265	AC155352.2_FG010
Zm00001d013231	GRMZM2G312069	19.2362	0.341301	38.1311	111.723	9.04459e-06	0.000554355	Up	0	0.0716397	0	3.25025	0.989493	0.767987		GO:0020037,GO:0005506,GO:0016705,GO:0055114	heme binding|iron ion binding|oxidoreductase activity, acting on paired donors, with incorporation or reduction of molecular oxygen|oxidation-reduction process											GRMZM2G162486		Zm00001d027293	GRMZM2G060296	GRMZM2G060265
Zm00001d023774	GRMZM2G106177	18.6116	0.341301	36.8819	108.063	0.00259919	0.0474779	Up	0	0	0	5.77092	1.13322	1.37654		GO:0016021	integral component of membrane											GRMZM2G018177		Zm00001d027293	GRMZM2G176952	GRMZM2G060296
Zm00001d004921	GRMZM2G127418	100.433	2.04781	198.818	97.0881	0.00357336	0.0597676	Up	0	0.299303	0	22.3463	2.57769	5.55496		GO:0008168,GO:0008171	methyltransferase activity|O-methyltransferase activity											GRMZM2G458659		Zm00001d027295	GRMZM2G164696	GRMZM2G176952
Zm00001d044947	#N/A	14.6927	0.312809	29.0726	92.9403	0.023695	0.215986	Up	0	0	0.0417312	2.07624	0.180184	0.306273		GO:0006629	lipid metabolic process											GRMZM2G149317		Zm00001d027296	GRMZM2G703466	GRMZM2G164696
Zm00001d002055	GRMZM2G334514	14.5857	0.312809	28.8587	92.2564	0.00488988	0.0748031	Up	0	0	0	4.15799	0.811279	1.95391														GRMZM2G412604		Zm00001d027298	GRMZM2G114469	GRMZM2G703466
Zm00001d049277	GRMZM2G047800	14.2666	0.312809	28.2204	90.2161	7.80004e-09	1.18994e-06	Up	0	0	0.0540084	1.59728	1.46716	1.49225		GO:0016491	oxidoreductase activity											GRMZM2G108133		Zm00001d027299	GRMZM2G114459	GRMZM2G114469
Zm00001d018064	GRMZM2G320786	11.74	0.312809	23.1673	74.0619	0.00560318	0.0819664	Up	0	0	0.0237669	1.14921	0.22643	0.200529		GO:0016491,GO:0005507,GO:0055114,GO:0048046,GO:0052716,GO:0046274	oxidoreductase activity|copper ion binding|oxidation-reduction process|apoplast|hydroquinone:oxygen oxidoreductase activity|lignin catabolic process											GRMZM2G339699		Zm00001d027300	GRMZM2G458423	GRMZM2G114459
Zm00001d004524	GRMZM2G076343	11.1831	0.341301	22.025	64.5324	0.0166836	0.171945	Up	0	0.141835	0	1.71081	0.283209	1.13286		GO:0030246	carbohydrate binding											GRMZM5G888620		Zm00001d027302	GRMZM2G109725	GRMZM2G458423
Zm00001d049217	GRMZM2G098102	152.769	4.70196	300.837	63.9811	0.00634052	0.0890454	Up	0.194056	0.0374151	0.0686903	19.7378	2.99405	3.52546		GO:0006508,GO:0008234	proteolysis|cysteine-type peptidase activity											GRMZM2G416632		Zm00001d027304	GRMZM2G410990	GRMZM2G109725
Zm00001d031666	GRMZM2G020631	1211.52	37.4005	2385.64	63.7863	2.29295e-06	0.000166659	Up	0.648119	1.50154	0.648394	41.8634	92.6992	33.9936														GRMZM2G054115		Zm00001d027305	GRMZM2G158378	GRMZM2G410990
Zm00001d039459	GRMZM2G397755	9.97418	0.312809	19.6356	62.7716	0.0183555	0.18339	Up	0	0	0.047207	1.47207	0.153125	0.355057														GRMZM2G089317		na	GRMZM2G459354	GRMZM2G158378
Zm00001d020652	GRMZM2G429617	10.8485	0.341301	21.3556	62.5713	0.00479371	0.0737534	Up	0	0.105513	0	3.10277	0.722491	0.414606		GO:0016021	integral component of membrane											GRMZM2G042639		Zm00001d027307	GRMZM2G028033	GRMZM2G459354
Zm00001d050805	GRMZM2G033665	9.93588	0.312809	19.5589	62.5267	6.50501e-05	0.00292252	Up	0	0	0.0215544	0.713653	0.220557	0.252105		GO:0016021,GO:0006952,GO:0005524,GO:0004672,GO:0006468	integral component of membrane|defense response|ATP binding|protein kinase activity|protein phosphorylation											#N/A		Zm00001d027307	GRMZM2G329177	GRMZM2G028033
Zm00001d042472	GRMZM2G013016	29.3121	0.995411	57.6289	57.8946	3.80574e-15	1.73223e-12	Up	0	0.0694075	0	2.36495	3.15512	2.89729		GO:0006351,GO:0006355	transcription, DNA-templated|regulation of transcription, DNA-templated											AC205471.4_FG007		Zm00001d027308	GRMZM2G028870	GRMZM2G329177
Zm00001d017975	GRMZM2G376105	52.5923	1.87686	103.308	55.043	0.00466952	0.0725523	Up	0	0	1.71871	42.4	10.5761	9.1743														GRMZM2G113480		Zm00001d027309	GRMZM2G052546	GRMZM2G028870
Zm00001d024960	GRMZM2G116520	639.44	23.7078	1255.17	52.9435	0.00110141	0.0256877	Up	0.45149	0.32126	3.13174	126.079	30.9223	32.5932		GO:0005576,GO:0004867	extracellular region|serine-type endopeptidase inhibitor activity											GRMZM2G134708		Zm00001d027311	GRMZM2G035377	GRMZM2G052546
Zm00001d021167	GRMZM2G065617	8.31518	0.312809	16.3175	52.1645	0.0249257	0.223914	Up	0	0	0.03591	1.29272	0.191889	0.228107		GO:0008152,GO:0016758	metabolic process|transferase activity, transferring hexosyl groups											GRMZM2G102737		Zm00001d027312	GRMZM2G085691	GRMZM2G035377
Zm00001d034848	GRMZM2G159353	8.24629	0.312809	16.1798	51.7241	0.00609363	0.0866751	Up	0	0	0.0402671	1.12303	0.133671	0.447756		GO:0016021,GO:0020037,GO:0005506,GO:0016705,GO:0004497,GO:0055114	integral component of membrane|heme binding|iron ion binding|oxidoreductase activity, acting on paired donors, with incorporation or reduction of molecular oxygen|monooxygenase activity|oxidation-reduction process											GRMZM2G043291		Zm00001d027313	GRMZM2G388684	GRMZM2G085691
Zm00001d042104	GRMZM2G028556	2532.38	103.54	4961.23	47.9162	1.70879e-22	2.37223e-19	Up	5.87785	7.4189	9.86376	423.917	440.643	257.154		GO:0004364,GO:0043234,GO:0009635,GO:0042803,GO:0046982,GO:0005515	glutathione transferase activity|protein complex|response to herbicide|protein homodimerization activity|protein heterodimerization activity|protein binding											GRMZM2G157334		na	GRMZM2G383052	GRMZM2G388684
Zm00001d006538	GRMZM5G846916	38.1801	1.56405	74.7962	47.8222	0.00464003	0.0723766	Up	0	0	0.145456	5.08768	0.738093	1.48018		GO:0004553,GO:0005975	hydrolase activity, hydrolyzing O-glycosyl compounds|carbohydrate metabolic process											GRMZM2G314769		na	GRMZM2G450705	GRMZM2G383052
Zm00001d025281	GRMZM2G425798	7.56176	0.312809	14.8107	47.3474	0.00197658	0.0391634	Up	0	0	0.0472107	1.31351	0.471956	0.31481														GRMZM2G128466		Zm00001d027314	GRMZM2G042552	GRMZM2G450705
Zm00001d049957	GRMZM2G391312	139.846	5.7996	273.892	47.2261	0.00239248	0.0447623	Up	0.0912327	0.0352763	0.115459	8.29668	1.7956	2.06981		GO:0000287,GO:0008152,GO:0016829,GO:0010333	magnesium ion binding|metabolic process|lyase activity|terpene synthase activity											GRMZM2G064382		Zm00001d027315	GRMZM2G042539	GRMZM2G042552
Zm00001d020875	GRMZM2G078779	21.8551	0.938428	42.7718	45.5782	0.0207172	0.198848	Up	0	0	0.264814	9.79446	1.09274	1.78941														GRMZM2G010348		Zm00001d027317	GRMZM2G042250	GRMZM2G042539
Zm00001d037389	GRMZM2G313761	23.7263	1.02761	46.425	45.1774	1.96109e-06	0.000146561	Up	0.0209148	0	0	0.278815	0.947719	0.850059		GO:0016021	integral component of membrane											#N/A		Zm00001d027318	GRMZM2G041881	GRMZM2G042250
Zm00001d008548	GRMZM2G156632	15.654	0.682602	30.6254	44.8656	0.0108855	0.129938	Up	0	0.294333	0	9.87833	1.70342	2.10435		GO:0008233,GO:0005576,GO:0004867	peptidase activity|extracellular region|serine-type endopeptidase inhibitor activity											GRMZM2G055107		Zm00001d027319	GRMZM2G085827	GRMZM2G041881
Zm00001d048644	GRMZM2G457287	115.271	5.06564	225.476	44.5109	0.00688632	0.0943259	Up	0.0358843	0	0.36232	12.8572	2.63497	2.40058														GRMZM2G007729		Zm00001d027320	GRMZM2G085872	GRMZM2G085827
Zm00001d006948	GRMZM2G075461	201.561	8.98899	394.133	43.8462	8.2136e-10	1.54088e-07	Up	0.129973	0.200741	0.0728009	3.2427	6.95614	7.09668		GO:0020037,GO:0005506,GO:0016705,GO:0004497,GO:0055114	heme binding|iron ion binding|oxidoreductase activity, acting on paired donors, with incorporation or reduction of molecular oxygen|monooxygenase activity|oxidation-reduction process											GRMZM2G066413		Zm00001d027320	GRMZM2G086242	GRMZM2G085872
Zm00001d006947	GRMZM2G075244	212.112	9.71313	414.511	42.6753	1.72667e-49	1.59804e-45	Up	0.13715	0.461154	0.32677	12.4267	14.9757	12.6407		GO:0016021,GO:0020037,GO:0005506,GO:0016705,GO:0004497,GO:0055114	integral component of membrane|heme binding|iron ion binding|oxidoreductase activity, acting on paired donors, with incorporation or reduction of molecular oxygen|monooxygenase activity|oxidation-reduction process											GRMZM2G306032		Zm00001d027321	GRMZM2G085885	GRMZM2G086242
Zm00001d045211	GRMZM2G338056	6.76247	0.312809	13.2121	42.237	0.000208888	0.0074836	Up	0	0	0	0.43816	0	0.234242		GO:0046872	metal ion binding											GRMZM2G114793		Zm00001d027322	GRMZM2G086269	GRMZM2G085885
Zm00001d018097	GRMZM2G159547	6.58652	0.312809	12.8602	41.1121	0.00414945	0.0665566	Up	0	0	0.0465647	0.178735	0.0939863	0.609724		GO:0003677	DNA binding											GRMZM2G103617		Zm00001d027323	GRMZM5G802392	GRMZM2G086269
Zm00001d023994	GRMZM2G016890	67.4127	3.21357	131.612	40.9551	8.94034e-06	0.000549178	Up	0	0.0395618	0.0903341	2.44897	0.548833	1.41107	4-hydroxy-7-methoxy-3-oxo-3,4-dihydro-2H-1,4-benzoxazin-2-yl glucoside beta-D-glucosidase 1, chloroplastic [Source:Uniprot/SWISSPROT;Acc:P49235]	GO:0004553,GO:0005975,GO:0102483,GO:0008422	hydrolase activity, hydrolyzing O-glycosyl compounds|carbohydrate metabolic process|scopolin beta-glucosidase activity|beta-glucosidase activity											GRMZM2G090432		Zm00001d027324	GRMZM2G006673	GRMZM5G802392
Zm00001d025390	GRMZM2G042811	6.47316	0.312809	12.6335	40.3872	0.00195369	0.038829	Up	0	0	0	0.429351	0.0654216	0.171658		GO:0005524,GO:0004672,GO:0004674,GO:0048544,GO:0006468	ATP binding|protein kinase activity|protein serine/threonine kinase activity|recognition of pollen|protein phosphorylation											GRMZM2G148387		Zm00001d027325	GRMZM2G007025	GRMZM2G006673
Zm00001d004375	GRMZM2G172695	6.44319	0.312809	12.5736	40.1956	0.000367966	0.0115181	Up	0	0	0.044953	0.691018	0.444287	0.294938														GRMZM2G119300		Zm00001d027326	GRMZM2G015384	GRMZM2G007025
Zm00001d013572	GRMZM2G403719	25.8615	1.27973	50.4434	39.4172	0.0029076	0.0511919	Up	0	0.0326808	0.0892677	1.64842	0.416499	0.475701		GO:0005524,GO:0004672,GO:0006468	ATP binding|protein kinase activity|protein phosphorylation											GRMZM2G175076		Zm00001d027328	GRMZM2G436286	GRMZM2G015384
Zm00001d012024	GRMZM2G180330	12.5742	0.625619	24.5228	39.1977	0.0303911	0.254199	Up	0	0	0.105096	0.89006	0.334981	0.110865														GRMZM2G093276		Zm00001d027329	GRMZM2G137366	GRMZM2G436286
Zm00001d035865	GRMZM2G124815	13.5243	0.686313	26.3623	38.4114	0.00243591	0.0453914	Up	0.0878077	0	0.0738768	3.27084	0.0832108	1.33021		GO:0016747	transferase activity, transferring acyl groups other than amino-acyl groups											GRMZM2G074611		Zm00001d027330	GRMZM2G137352	GRMZM2G137366
Zm00001d041082	AC214360.3_FG001	444.49	22.6101	866.369	38.3177	0.00544518	0.0805034	Up	0.144209	0.121564	0.855918	31.5115	5.89043	6.9945		GO:0000287,GO:0008152,GO:0016829,GO:0010333	magnesium ion binding|metabolic process|lyase activity|terpene synthase activity											GRMZM5G836353		Zm00001d027332	GRMZM2G137329	GRMZM2G137352
Zm00001d020495	GRMZM2G169149	46.3439	2.50247	90.1853	36.0384	0.00476391	0.0734539	Up	0	0	0.595311	14.7819	2.51711	3.92644		GO:0006355,GO:0003700,GO:0043565	regulation of transcription, DNA-templated|transcription factor activity, sequence-specific DNA binding|sequence-specific DNA binding											#N/A		Zm00001d027333	GRMZM2G137236	GRMZM2G137329
Zm00001d007718	AC148152.3_FG005	242.887	13.2903	472.485	35.5512	2.8919e-16	1.60587e-13	Up	0.29507	0.20269	0.713143	21.3199	12.2656	11.2284		GO:0016491,GO:0055114,GO:0046872	oxidoreductase activity|oxidation-reduction process|metal ion binding											GRMZM2G076075		Zm00001d027334	GRMZM2G436226	GRMZM2G137236
Zm00001d018686	GRMZM2G026189	6.18302	0.341301	12.0247	35.2321	0.0460154	0.32637	Up	0	0.0341518	0	0.503588	0.0329887	0.125248		GO:0043531	ADP binding											GRMZM2G103812		Zm00001d027335	GRMZM2G314660	GRMZM2G436226
Zm00001d005879	GRMZM2G475185	5.65878	0.312809	11.0048	35.1804	0.000998167	0.0240783	Up	0	0	0	0.796906	0	0														GRMZM2G141931		Zm00001d027337	GRMZM2G092232	GRMZM2G314660
Zm00001d037182	GRMZM2G156712	97.3144	5.49673	189.132	34.4081	6.65448e-17	4.01656e-14	Up	0.0835122	0.522671	0.0369999	9.31918	8.22156	4.82795		GO:0016491,GO:0003824,GO:0010181,GO:0055114	oxidoreductase activity|catalytic activity|FMN binding|oxidation-reduction process											GRMZM2G155242		Zm00001d027338	GRMZM2G393062	GRMZM2G092232
Zm00001d050977	GRMZM2G123037	10.9829	0.625619	21.3402	34.1106	0.00916678	0.11527	Up	0	0	0.0780243	1.80924	0.388151	0.51749		GO:0020037,GO:0005506,GO:0016705,GO:0004497,GO:0055114	heme binding|iron ion binding|oxidoreductase activity, acting on paired donors, with incorporation or reduction of molecular oxygen|monooxygenase activity|oxidation-reduction process											GRMZM2G339563		Zm00001d027339	GRMZM2G092165	GRMZM2G393062
Zm00001d053249	GRMZM2G075925	17.0336	0.995411	33.0718	33.2243	0.000532211	0.0151927	Up	0	0	0.125497	2.62006	1.06413	3.92063		GO:0005576,GO:0030145,GO:0045735	extracellular region|manganese ion binding|nutrient reservoir activity											GRMZM2G139874		Zm00001d027340	GRMZM2G124550	GRMZM2G092165
Zm00001d000294	#N/A	68.5582	4.04976	133.067	32.8579	0.00421618	0.0672772	Up	0.161364	0.205861	0.228514	14.4341	3.46875	3.2081		GO:0030170,GO:0003824	pyridoxal phosphate binding|catalytic activity											GRMZM2G039278		Zm00001d027341	GRMZM2G144197	GRMZM2G124550
Zm00001d021168	GRMZM2G078465	3039.24	182.856	5895.63	32.242	1.84848e-18	1.42564e-15	Up	0.871619	21.0699	2.93655	255.031	350.345	218.482		GO:0008152,GO:0016758	metabolic process|transferase activity, transferring hexosyl groups											GRMZM2G142315		Zm00001d027342	GRMZM2G144101	GRMZM2G144197
Zm00001d031157	GRMZM2G136372	16.5503	0.999123	32.1014	32.1296	0.0384976	0.294135	Up	0	0	0	0	0	0														GRMZM2G127609		Zm00001d027343	GRMZM2G077615	GRMZM2G144101
Zm00001d016632	GRMZM2G320287	5.17171	0.312809	10.0306	32.0662	0.00196732	0.0390161	Up	0	0	0.0274982	0.399578	0.16934	0.254006		GO:0046872,GO:0003676	metal ion binding|nucleic acid binding											GRMZM2G076062		Zm00001d027344	GRMZM2G077669	GRMZM2G077615
Zm00001d002776	AC212835.3_FG008	10.6702	0.65411	20.6863	31.6251	0.00165386	0.0342135	Up	0	0.0481769	0.0435631	1.27937	0.517065	0.375888		GO:0005524,GO:0004672,GO:0004674,GO:0006468	ATP binding|protein kinase activity|protein serine/threonine kinase activity|protein phosphorylation											GRMZM2G152135		Zm00001d027345	GRMZM2G077760	GRMZM2G077669
Zm00001d025566	GRMZM2G087824	27.4468	1.71022	53.1834	31.0975	0.00931176	0.116775	Up	0	0.170888	0	2.72952	0.494811	0.403287														GRMZM2G129860		Zm00001d027346	GRMZM2G077769	GRMZM2G077760
Zm00001d048087	GRMZM2G423331	46.4678	2.90076	90.0349	31.0384	0.0027475	0.0491817	Up	0	0.123928	0.226129	6.34715	2.07358	1.79649		GO:0008168,GO:0008171	methyltransferase activity|O-methyltransferase activity											GRMZM2G103864		Zm00001d027347	GRMZM2G077780	GRMZM2G077769
Zm00001d007285	GRMZM2G125196	2441.57	153.589	4729.56	30.7937	6.34582e-16	3.20349e-13	Up	0.404026	16.5066	1.7201	223.706	234.676	124.212		GO:0016491,GO:0008270,GO:0055114	oxidoreductase activity|zinc ion binding|oxidation-reduction process											GRMZM2G180283		Zm00001d027348	GRMZM2G440562	GRMZM2G077780
Zm00001d024210	#N/A	509.866	32.4861	987.246	30.3898	0.00888114	0.112711	Up	0.450169	0.188088	1.07204	36.2653	6.71426	6.91166	(S)-beta-macrocarpene synthase [Source:Uniprot/SWISSPROT;Acc:Q1EG72]	GO:0000287,GO:0008152,GO:0016829,GO:0010333,GO:0016114,GO:0005737,GO:0016853,GO:0006952	magnesium ion binding|metabolic process|lyase activity|terpene synthase activity|terpenoid biosynthetic process|cytoplasm|isomerase activity|defense response											GRMZM2G065585		Zm00001d027349	GRMZM2G440537	GRMZM2G440562
Zm00001d051048	GRMZM2G044677	78.1865	5.00926	151.364	30.2168	4.39916e-27	9.39559e-24	Up	0.0110239	0.0521884	0.0409093	1.27026	1.28498	1.00074														GRMZM2G151227		Zm00001d027351	GRMZM2G426802	GRMZM2G440537
Zm00001d050885	AC206332.3_FG005	5.3157	0.341301	10.2901	30.1496	0.0489926	0.33956	Up	0	0.0309459	0	0.541743	0.0604032	0		GO:0016021,GO:0016020,GO:0030246,GO:0006486,GO:0008378,GO:0005794	integral component of membrane|membrane|carbohydrate binding|protein glycosylation|galactosyltransferase activity|Golgi apparatus											GRMZM2G106303		Zm00001d027352	GRMZM2G126218	GRMZM2G426802
Zm00001d037721	GRMZM2G051474	5.30778	0.341301	10.2743	30.1032	0.00159763	0.0334275	Up	0	0.0557063	0	0.877281	0.221543	0.382378		GO:0008152,GO:0016758	metabolic process|transferase activity, transferring hexosyl groups											GRMZM2G080487		Zm00001d027353	GRMZM2G126199	GRMZM2G126218
Zm00001d028103	GRMZM2G055101	4.76089	0.312809	9.20897	29.4396	0.00904907	0.114359	Up	0	0	0.0279783	0.571818	0.152537	0.151541		GO:0004553,GO:0005975,GO:0016798	hydrolase activity, hydrolyzing O-glycosyl compounds|carbohydrate metabolic process|hydrolase activity, acting on glycosyl bonds											GRMZM6G056015		Zm00001d027354	GRMZM2G055880	GRMZM2G126199
Zm00001d044308	AC217499.3_FG002	11.2567	0.747008	21.7663	29.138	7.14008e-05	0.00315174	Up	0	0	0	0.344056	1.1117	1.09688		GO:0016021	integral component of membrane											GRMZM2G054803		Zm00001d027355	GRMZM2G055698	GRMZM2G055880
Zm00001d037749	GRMZM2G132550	14.1003	0.938428	27.2622	29.0509	0.000875043	0.021974	Up	0	0	0.147527	3.51476	1.02605	0.866487														GRMZM2G358153		Zm00001d027358	GRMZM2G703469	GRMZM2G055698
Zm00001d028693	GRMZM2G042639	5171.01	351.461	9990.57	28.4258	4.61511e-25	8.00865e-22	Up	0.118853	9.99985	0.972975	101.073	126.84	93.276		GO:0005515	protein binding											GRMZM2G024104		Zm00001d027359	GRMZM2G062210	GRMZM2G703469
Zm00001d027557	GRMZM2G475059	2370.66	161.138	4580.17	28.4239	0.000277818	0.00928664	Up	1.21176	23.9555	3.29666	276.266	441.353	98.1933		GO:0005515	protein binding											GRMZM2G084181		Zm00001d027361	GRMZM2G088482	GRMZM2G062210
Zm00001d015867	GRMZM2G082504	4.54762	0.312809	8.78244	28.076	0.0370138	0.287589	Up	0	0	0	1.497	0.179429	0.526375														GRMZM2G304712		Zm00001d027362	GRMZM2G044388	GRMZM2G088482
Zm00001d018701	GRMZM2G333274	30.8693	2.14813	59.5905	27.7407	0.00825972	0.107264	Up	0.16409	0.0393548	0.0357459	4.04182	0.581328	1.19424		GO:0016021,GO:0016020,GO:0042546,GO:0008107	integral component of membrane|membrane|cell wall biogenesis|galactoside 2-alpha-L-fucosyltransferase activity											GRMZM2G174896		Zm00001d027363	GRMZM2G044247	GRMZM2G044388
Zm00001d029648	GRMZM2G044481	322.74	22.8338	622.646	27.2686	0.00713747	0.0967635	Up	0.127137	0.10487	0.831714	20.5409	4.25774	4.62545		GO:0000287,GO:0008152,GO:0016829,GO:0010333	magnesium ion binding|metabolic process|lyase activity|terpene synthase activity											GRMZM2G060742		Zm00001d027365	GRMZM2G029713	GRMZM2G044247
Zm00001d002035	GRMZM2G032977	48.6096	3.45635	93.7628	27.1277	0.0110411	0.131288	Up	0.0956752	0.0613796	0	4.41621	0.654036	1.07566		GO:0003676,GO:0016788,GO:0006308,GO:0004519	nucleic acid binding|hydrolase activity, acting on ester bonds|DNA catabolic process|endonuclease activity											GRMZM2G144153		Zm00001d027366	GRMZM2G029824	GRMZM2G029713
Zm00001d024996	GRMZM2G075315	764.975	54.7965	1475.15	26.9206	0.00417956	0.0669213	Up	1.24542	2.27613	4.91916	164.931	40.3805	42.7734		GO:0005576,GO:0004867,GO:0008233	extracellular region|serine-type endopeptidase inhibitor activity|peptidase activity											GRMZM2G108847		Zm00001d027367	GRMZM2G320099	GRMZM2G029824
Zm00001d050164	GRMZM2G359986	9.93131	0.714805	19.1478	26.7875	0.00091378	0.0226124	Up	0.0473717	0.0458894	0	1.61326	0.364575	0.740009		GO:0016021,GO:0005524,GO:0004672,GO:0030247,GO:0006468	integral component of membrane|ATP binding|protein kinase activity|polysaccharide binding|protein phosphorylation											GRMZM2G037685		Zm00001d027368	GRMZM2G030173	GRMZM2G320099
Zm00001d006531	GRMZM2G365282	24.9149	1.80682	48.023	26.5786	0.00999264	0.122872	Up	0.0874441	0	0.0410823	1.79388	0.122943	0.39672														GRMZM2G009808		Zm00001d027369	GRMZM2G030299	GRMZM2G030173
Zm00001d010385	GRMZM2G116238	4.29659	0.312809	8.28037	26.471	0.0113034	0.133379	Up	0	0	0.0464579	0.854924	0.152533	0.254328														GRMZM2G111300		Zm00001d027369	GRMZM2G320111	GRMZM2G030299
Zm00001d024412	GRMZM2G144407	17.9903	1.33671	34.6439	25.9173	0.00388715	0.0635236	Up	0	0.0282087	0.013541	0.529022	0.109467	0.117765		GO:0016021,GO:0005789,GO:0050660,GO:0010181,GO:0050661,GO:0003958,GO:0016491,GO:0055114	integral component of membrane|endoplasmic reticulum membrane|flavin adenine dinucleotide binding|FMN binding|NADP binding|NADPH-hemoprotein reductase activity|oxidoreductase activity|oxidation-reduction process											GRMZM2G037485		Zm00001d027370	GRMZM2G030567	GRMZM2G320111
Zm00001d025753	GRMZM2G005633	12.6009	0.938428	24.2633	25.8553	0.0054136	0.0802074	Up	0	0	0.206524	3.72505	1.15459	0.845857		GO:0005975,GO:0004568,GO:0008061,GO:0016998,GO:0006032	carbohydrate metabolic process|chitinase activity|chitin binding|cell wall macromolecule catabolic process|chitin catabolic process											GRMZM2G025175		na	GRMZM2G320117	GRMZM2G030567
Zm00001d023811	GRMZM2G075283	89.9562	6.73803	173.174	25.701	0.0108583	0.129669	Up	0.499006	0.160906	0.812237	30.4925	5.98203	6.23424		GO:0006952,GO:0009607	defense response|response to biotic stimulus											GRMZM2G046186		Zm00001d027371	GRMZM2G085909	GRMZM2G320117
Zm00001d035013	#N/A	179.795	13.4995	346.091	25.6372	0.00742186	0.0994057	Up	0.643082	0.375207	0.116465	23.0592	4.89222	4.82882		GO:0020037,GO:0005506,GO:0016705,GO:0055114	heme binding|iron ion binding|oxidoreductase activity, acting on paired donors, with incorporation or reduction of molecular oxygen|oxidation-reduction process											GRMZM2G457929		Zm00001d027373	GRMZM2G008327	GRMZM2G085909
Zm00001d018372	GRMZM2G031257	4.97412	0.373504	9.57474	25.6349	0.00283868	0.050426	Up	0	0	0	0.435643	0.355543	0.176648		GO:0005634,GO:0004721	nucleus|phosphoprotein phosphatase activity											GRMZM2G181236		Zm00001d027374	GRMZM2G008710	GRMZM2G008327
Zm00001d027908	AC191071.3_FG001	13.6126	1.05982	26.1655	24.6887	0.00187646	0.0376716	Up	0.0928997	0	0.0402108	1.55661	0.525973	0.524852		GO:0016491,GO:0050660,GO:0055114,GO:0050661,GO:0004499	oxidoreductase activity|flavin adenine dinucleotide binding|oxidation-reduction process|NADP binding|N,N-dimethylaniline monooxygenase activity											AC226235.2_FG001		Zm00001d027375	GRMZM2G008773	GRMZM2G008710
Zm00001d036927	GRMZM2G310144	37.9829	2.96516	73.0006	24.6194	0.00999206	0.122872	Up	0.0139482	0.0132696	0.0778608	1.9186	0.320771	0.436537		GO:0016021,GO:0005524,GO:0006810,GO:0005215,GO:0016887	integral component of membrane|ATP binding|transport|transporter activity|ATPase activity											GRMZM2G173040		Zm00001d027376	GRMZM2G308570	GRMZM2G008773
Zm00001d049219	GRMZM2G166870	127.825	10.1281	245.523	24.2418	0.0352927	0.279972	Up	0.5651	0.10857	0.300971	17.2351	2.29764	2.53108		GO:0006508,GO:0008234,GO:0016021	proteolysis|cysteine-type peptidase activity|integral component of membrane											GRMZM2G069722		Zm00001d027383	GRMZM2G087207	GRMZM2G308570
Zm00001d049028	GRMZM2G358153	343.138	27.708	658.567	23.7681	0.00284177	0.0504487	Up	0.459366	0.175527	3.34862	63.1105	16.1549	17.981		GO:0004553,GO:0005975	hydrolase activity, hydrolyzing O-glycosyl compounds|carbohydrate metabolic process											GRMZM2G090980		Zm00001d027384	GRMZM2G387837	GRMZM2G087207
Zm00001d043344	GRMZM2G156877	74.6599	6.05734	143.262	23.651	1.26917e-05	0.000734138	Up	0	0.203438	0.682446	11.9777	4.40537	4.36922		GO:0005515,GO:0016740	protein binding|transferase activity											GRMZM2G117942		Zm00001d027385	GRMZM2G013634	GRMZM2G387837
Zm00001d018203	GRMZM5G894568	21.4526	1.74613	41.1591	23.5716	0.0241775	0.218803	Up	0.0761042	0	0	2.12678	0.378937	0.307681		GO:0006355,GO:0003700,GO:0043565,GO:0044212	regulation of transcription, DNA-templated|transcription factor activity, sequence-specific DNA binding|sequence-specific DNA binding|transcription regulatory region DNA binding											GRMZM2G148904		Zm00001d027386	GRMZM2G312438	GRMZM2G013634
Zm00001d002816	GRMZM2G109262	8.35524	0.682602	16.0279	23.4806	0.0023566	0.0442102	Up	0	0.122271	0	3.32537	0.467949	0.941076														GRMZM2G076423		Zm00001d027387	GRMZM2G013986	GRMZM2G312438
Zm00001d045106	GRMZM2G038640	4.14355	0.341301	7.94579	23.2809	0.00884484	0.112444	Up	0	0	0	0.195433	0.075872	0.0927438		GO:0016021	integral component of membrane											GRMZM2G087254		Zm00001d027389	GRMZM2G014382	GRMZM2G013986
Zm00001d039607	GRMZM2G363554	56.5517	4.69274	108.411	23.1018	1.3906e-09	2.55696e-07	Up	0	0.487049	0.182975	5.32971	9.16761	5.74742		GO:0008152,GO:0016758	metabolic process|transferase activity, transferring hexosyl groups											GRMZM5G811095		Zm00001d027390	GRMZM2G344566	GRMZM2G014382
Zm00001d006535	GRMZM2G087625	102.606	8.64709	196.565	22.732	0.00231392	0.043794	Up	0.240509	0.0288428	0.446789	9.92171	2.18188	3.46151		GO:0016021,GO:0005524,GO:0004672,GO:0006468	integral component of membrane|ATP binding|protein kinase activity|protein phosphorylation											GRMZM2G119975		Zm00001d027392	GRMZM2G453794	GRMZM2G344566
Zm00001d044833	GRMZM2G124276	3.70318	0.312809	7.09356	22.6769	0.0167668	0.172483	Up	0	0	0.0373763	0.182761	0.192434	0.150995		GO:0016021,GO:0016491,GO:0005506,GO:0006633,GO:0055114	integral component of membrane|oxidoreductase activity|iron ion binding|fatty acid biosynthetic process|oxidation-reduction process											GRMZM2G479423		na	GRMZM2G474459	GRMZM2G453794
Zm00001d012427	GRMZM2G112799	3.66491	0.312809	7.017	22.4322	0.0271293	0.235529	Up	0	0	0	0	0	0		GO:0046872,GO:0003676	metal ion binding|nucleic acid binding											GRMZM2G003246		Zm00001d027393	GRMZM2G167568	GRMZM2G474459
Zm00001d040158	GRMZM2G079807	12.6304	1.08831	24.1725	22.2111	0.00805573	0.105354	Up	0	0	0	0.392722	1.16749	0.641585		GO:0003676	nucleic acid binding											GRMZM2G134671		Zm00001d027394	GRMZM2G181153	GRMZM2G167568
Zm00001d039520	#N/A	32.5138	2.80224	62.2253	22.2056	0.00374816	0.0617978	Up	0.200452	0.0962524	0.0857341	5.92298	1.56992	1.56485		GO:0016491,GO:0003824,GO:0050660,GO:0016614,GO:0055114,GO:0019139,GO:0009690	oxidoreductase activity|catalytic activity|flavin adenine dinucleotide binding|oxidoreductase activity, acting on CH-OH group of donors|oxidation-reduction process|cytokinin dehydrogenase activity|cytokinin metabolic process											#N/A		Zm00001d027395	GRMZM2G406204	GRMZM2G181153
Zm00001d037426	GRMZM2G149700	8.53196	0.747008	16.3169	21.843	0.0323369	0.265553	Up	0	0	0	4.43283	0.643251	1.28992		GO:0016021	integral component of membrane											GRMZM2G071396		Zm00001d027399	GRMZM2G169402	GRMZM2G406204
Zm00001d051251	GRMZM2G458659	2816.23	248.631	5383.83	21.6539	8.48579e-08	9.65606e-06	Up	0.890324	19.1431	0.887898	112.541	212.242	105.18														GRMZM2G003970		Zm00001d027400	GRMZM2G473389	GRMZM2G169402
Zm00001d011641	GRMZM2G360219	29.4705	2.65236	56.2887	21.2222	7.77909e-05	0.00333828	Up	0.0179414	0.0172033	0.0796789	1.34882	0.606229	0.463377		GO:0005524,GO:0004672,GO:0006468,GO:0005515	ATP binding|protein kinase activity|protein phosphorylation|protein binding											GRMZM2G415007		Zm00001d027401	GRMZM2G049031	GRMZM2G473389
Zm00001d034417	GRMZM2G031062	21.3402	1.93384	40.7466	21.0703	0.000962229	0.0234972	Up	0	0.19552	0	4.91096	0.987381	1.35628		GO:0008080	N-acetyltransferase activity											GRMZM2G141473		Zm00001d027403	GRMZM2G104468	GRMZM2G049031
Zm00001d046318	GRMZM2G080839	231.441	21.3911	441.491	20.639	0.0122197	0.140421	Up	0.466432	0.300107	1.80358	33.3126	5.74211	8.92541		GO:0016491,GO:0003824,GO:0050660,GO:0016614,GO:0055114	oxidoreductase activity|catalytic activity|flavin adenine dinucleotide binding|oxidoreductase activity, acting on CH-OH group of donors|oxidation-reduction process											GRMZM2G056247		Zm00001d027404	GRMZM2G303810	GRMZM2G104468
Zm00001d047325	GRMZM2G359033	3.36809	0.312809	6.42337	20.5345	0.0262874	0.231631	Up	0	0	0.165712	0	0	0														GRMZM2G032218		Zm00001d027405	GRMZM2G136859	GRMZM2G303810
Zm00001d000298	#N/A	1072.78	100.598	2044.95	20.3279	0.000487163	0.0142081	Up	5.08769	1.31322	6.98918	169.88	48.6728	53.7586		GO:0016301,GO:0005515	kinase activity|protein binding											GRMZM2G048472		Zm00001d027409	GRMZM2G082227	GRMZM2G136859
Zm00001d044906	GRMZM2G000236	1433.99	134.62	2733.36	20.3042	2.46242e-19	2.07179e-16	Up	3.59766	2.85082	9.27825	118.711	131.058	79.6682		GO:0016491,GO:0003824,GO:0010181,GO:0055114	oxidoreductase activity|catalytic activity|FMN binding|oxidation-reduction process											GRMZM2G172230		Zm00001d027411	GRMZM2G341934	GRMZM2G082227
Zm00001d015363	GRMZM2G017802	3.91609	0.373504	7.45869	19.9695	0.0147105	0.157942	Up	0.0536371	0	0	0.0954207	0.616755	0.306983														GRMZM2G087192		Zm00001d027412	GRMZM2G040762	GRMZM2G341934
Zm00001d045843	GRMZM2G089506	95.0347	9.08691	180.983	19.9168	0.000134437	0.00526465	Up	0.180467	0.173848	1.0492	16.982	5.75214	5.35428		GO:0006508,GO:0004190	proteolysis|aspartic-type endopeptidase activity											GRMZM2G472231		Zm00001d027415	GRMZM2G105415	GRMZM2G040762
Zm00001d045884	GRMZM2G420988	58.3267	5.58161	111.072	19.8996	0.00699601	0.0954048	Up	0.102078	0.196191	0.354626	10.1168	2.56361	2.11395		GO:0016021,GO:0006810,GO:0005743,GO:0005215,GO:0055085	integral component of membrane|transport|mitochondrial inner membrane|transporter activity|transmembrane transport											GRMZM2G068455		Zm00001d027416	GRMZM2G105436	GRMZM2G105415
Zm00001d031189	GRMZM2G059064	10.3636	0.999123	19.7281	19.7455	0.0142317	0.155019	Up	0	0	0	0	0	0														GRMZM2G425728		Zm00001d027419	GRMZM2G475289	GRMZM2G105436
Zm00001d017101	GRMZM2G121115	3.52662	0.341301	6.71195	19.6658	0.0211209	0.201381	Up	0	0	0	0.431277	0.234455	0.709597		GO:0006355,GO:0005634,GO:0008270,GO:0004402,GO:0003712,GO:0005515	regulation of transcription, DNA-templated|nucleus|zinc ion binding|histone acetyltransferase activity|transcription cofactor activity|protein binding											GRMZM2G134219		Zm00001d027420	GRMZM2G475296	GRMZM2G475289
Zm00001d011429	#N/A	3.51186	0.341301	6.68242	19.5793	0.0213169	0.202485	Up	0	0	0	0	0	0		GO:0008152,GO:0008168,GO:0006779,GO:0055114	metabolic process|methyltransferase activity|porphyrin-containing compound biosynthetic process|oxidation-reduction process											GRMZM2G061702		Zm00001d027421	GRMZM2G176820	GRMZM2G475296
Zm00001d031656	#N/A	33.2855	3.23643	63.3345	19.5692	0.000612209	0.0168798	Up	0	0	0	0	0	0		GO:0005515	protein binding											GRMZM2G479038		Zm00001d027422	GRMZM2G176840	GRMZM2G176820
Zm00001d019933	#N/A	6.41662	0.625619	12.2076	19.5129	0.0219465	0.205859	Up	0	0	0	0	0	0														GRMZM2G376105		Zm00001d027423	GRMZM2G475380	GRMZM2G176840
Zm00001d008399	GRMZM2G109627	21.2784	2.08372	40.4731	19.4235	0.0136224	0.150687	Up	0.0955226	0.091369	0.041829	3.56883	0.630127	0.969281		GO:0003677,GO:0006351,GO:0006355,GO:0005634,GO:0010150,GO:0009825,GO:0009908,GO:0009835	DNA binding|transcription, DNA-templated|regulation of transcription, DNA-templated|nucleus|leaf senescence|multidimensional cell growth|flower development|fruit ripening											GRMZM2G022090		Zm00001d027425	GRMZM2G026223	GRMZM2G475380
Zm00001d017799	GRMZM2G127846	48.4725	4.75894	92.1861	19.3711	1.19646e-06	9.46433e-05	Up	0.382244	0.111173	0	4.23268	3.8455	1.48968		GO:0046872,GO:0003676	metal ion binding|nucleic acid binding											GRMZM2G020631		Zm00001d027427	GRMZM2G070047	GRMZM2G026223
Zm00001d053279	#N/A	3.17792	0.312809	6.04304	19.3186	0.0333337	0.270391	Up	0	0	0.166519	1.41784	0.83996	0.501321		GO:0005737,GO:0042026	cytoplasm|protein refolding											GRMZM2G094375		Zm00001d027428	GRMZM2G070242	GRMZM2G070047
Zm00001d020967	GRMZM2G101741	31.5788	3.16832	59.9892	18.9341	1.66422e-12	5.31114e-10	Up	0	0	0	1.23087	3.35336	0														GRMZM2G344993		Zm00001d027429	GRMZM2G070259	GRMZM2G070242
Zm00001d042934	GRMZM5G804618	3.0637	0.312809	5.81459	18.5883	0.0357988	0.282402	Up	0	0	0.0951834	1.284	0.313606	0.207749		GO:0046872	metal ion binding											GRMZM2G159013		Zm00001d027430	GRMZM2G159427	GRMZM2G070259
Zm00001d005654	GRMZM2G373554	3.0637	0.312809	5.81459	18.5883	0.0357988	0.282402	Up	0	0	0	1.07066	0.383913	0.191207														GRMZM2G039639		Zm00001d027431	GRMZM2G159431	GRMZM2G159427
Zm00001d031815	GRMZM5G865811	7.31488	0.747008	13.8828	18.5845	0.0145068	0.157008	Up	0.0769287	0	0	0.8875	0.359794	0.0708515		GO:0016042,GO:0008152,GO:0016787,GO:0006629	lipid catabolic process|metabolic process|hydrolase activity|lipid metabolic process											GRMZM2G000423		Zm00001d022659	GRMZM2G461777	GRMZM2G159431
Zm00001d042739	GRMZM2G135722	1965.29	202.152	3728.43	18.4437	1.52493e-19	1.36579e-16	Up	1.18294	20.7905	4.61478	165.055	216.117	150.5		GO:0008152,GO:0016758	metabolic process|transferase activity, transferring hexosyl groups											GRMZM2G048616		Zm00001d027432	AC194428.3_FG006	GRMZM2G461777
Zm00001d039527	GRMZM2G308910	3.02562	0.312809	5.73843	18.3448	0.0412539	0.306935	Up	0	0	0	0.302499	0.326481	0														GRMZM2G088601		Zm00001d027433	AC194428.3_FG007	AC194428.3_FG006
Zm00001d026203	GRMZM2G097636	6.62205	0.686313	12.5578	18.2975	0.0140471	0.153792	Up	0.0586278	0	0	0.672819	0.110235	0.10988		GO:0003677	DNA binding											GRMZM2G095126		na	GRMZM2G159470	AC194428.3_FG007
Zm00001d014121	GRMZM2G122654	39.3316	4.09501	74.5681	18.2095	0.00871217	0.111234	Up	0	0.0288794	0.294237	4.26917	0.812383	1.35137		GO:0020037,GO:0005506,GO:0016705,GO:0004497,GO:0055114	heme binding|iron ion binding|oxidoreductase activity, acting on paired donors, with incorporation or reduction of molecular oxygen|monooxygenase activity|oxidation-reduction process											GRMZM2G000531		Zm00001d027434	GRMZM2G159477	GRMZM2G159470
Zm00001d006536	GRMZM2G140231	70.4765	7.43368	133.519	17.9614	0.0110911	0.1316	Up	0.0957099	0.061596	0.448458	7.86092	1.20693	2.2514		GO:0005524,GO:0016020,GO:0004672,GO:0006468	ATP binding|membrane|protein kinase activity|protein phosphorylation											GRMZM2G383408		Zm00001d027435	GRMZM2G327059	GRMZM2G159477
Zm00001d045091	#N/A	17.4979	1.87686	33.1189	17.6459	7.86551e-05	0.0033562	Up	0	0	0.393596	2.4047	0.892285	2.49713		GO:0016747	transferase activity, transferring acyl groups other than amino-acyl groups											GRMZM2G052266		Zm00001d027436	GRMZM2G165422	GRMZM2G327059
Zm00001d048969	GRMZM2G068331	58.7216	6.32861	111.115	17.5575	1.67267e-06	0.000128292	Up	0.0337124	0.0424167	0.0836174	0.515402	1.13059	1.06819		GO:0008270,GO:0005515	zinc ion binding|protein binding											GRMZM2G131099		Zm00001d027437	GRMZM5G838828	GRMZM2G165422
Zm00001d014649	GRMZM2G162098	31.2143	3.37087	59.0578	17.52	0.000103621	0.00426861	Up	0.0546741	0	0.0128575	1.12719	0.347281	0.486491		GO:0043531	ADP binding											GRMZM2G115660		Zm00001d027438	GRMZM2G465680	GRMZM5G838828
Zm00001d039642	GRMZM2G178209	123.67	13.4067	233.934	17.449	8.20822e-06	0.000508708	Up	0.0613131	0.647608	0.25009	4.19332	8.32022	4.16655		GO:0008152,GO:0016758	metabolic process|transferase activity, transferring hexosyl groups											GRMZM2G023847		na	GRMZM2G165362	GRMZM2G465680
Zm00001d050247	AC205562.3_FG002	19.01	2.08372	35.9364	17.2463	0.000501938	0.0145019	Up	0	0	0	4.07183	1.17202	1.56446		GO:0006355,GO:0003700,GO:0043565	regulation of transcription, DNA-templated|transcription factor activity, sequence-specific DNA binding|sequence-specific DNA binding											AC213521.3_FG005		Zm00001d027439	GRMZM2G119736	GRMZM2G165362
Zm00001d044908	GRMZM2G106303	870.455	97.0321	1643.88	16.9416	1.50393e-20	1.54655e-17	Up	3.03879	1.56549	6.34748	65.0805	74.3705	47.9579		GO:0016491,GO:0003824,GO:0010181,GO:0055114	oxidoreductase activity|catalytic activity|FMN binding|oxidation-reduction process											GRMZM2G430871		Zm00001d027441	GRMZM2G119494	GRMZM2G119736
Zm00001d026426	GRMZM2G085236	132.391	14.7731	250.009	16.9232	0.000632566	0.0172527	Up	0.0710833	0.12419	0.139472	3.51448	0.914198	1.21486		GO:0016021,GO:0005524,GO:0006810,GO:0055085,GO:0042626,GO:0016887	integral component of membrane|ATP binding|transport|transmembrane transport|ATPase activity, coupled to transmembrane movement of substances|ATPase activity											GRMZM2G111579		Zm00001d027442	GRMZM2G119471	GRMZM2G119494
Zm00001d029359	GRMZM2G311036	43.8392	4.90272	82.7757	16.8837	0.0221731	0.207205	Up	0.113088	0.0356469	0.373599	5.51368	1.32292	0.867917		GO:0008168,GO:0008171	methyltransferase activity|O-methyltransferase activity											GRMZM2G104999		Zm00001d027443	GRMZM2G090051	GRMZM2G119471
Zm00001d042143	GRMZM2G065585	258.449	29.0397	487.859	16.7997	0.00724081	0.0977826	Up	1.10211	1.26036	3.16198	66.2595	14.9373	17.7283		GO:0004553,GO:0005975	hydrolase activity, hydrolyzing O-glycosyl compounds|carbohydrate metabolic process											#N/A		Zm00001d027443	GRMZM5G826824	GRMZM2G090051
Zm00001d024903	GRMZM5G833699	3.32249	0.373504	6.27148	16.7909	0.0305387	0.254921	Up	0.0142216	0	0	0.0616705	0.116482	0.0639425		GO:0005524,GO:0006457,GO:0006950,GO:0051082,GO:0009816,GO:0061077	ATP binding|protein folding|response to stress|unfolded protein binding|defense response to bacterium, incompatible interaction|chaperone-mediated protein folding											GRMZM2G147752		Zm00001d027444	GRMZM2G089976	GRMZM5G826824
Zm00001d023768	GRMZM2G169240	20.9436	2.37175	39.5154	16.6609	0.0490173	0.339647	Up	0.194316	0	0.24855	4.93573	1.11437	0.834989		GO:0016021,GO:0006629,GO:0055114,GO:0016717	integral component of membrane|lipid metabolic process|oxidation-reduction process|oxidoreductase activity, acting on paired donors, with oxidation of a pair of donors resulting in the reduction of molecular oxygen to two molecules of water											GRMZM2G108597		na	GRMZM2G013730	GRMZM2G089976
Zm00001d013127	GRMZM2G336783	2.98628	0.341301	5.63127	16.4994	0.042257	0.310223	Up	0	0	0	0.151937	0.0198437	0.147473		GO:0016020,GO:0055085,GO:0030001,GO:0046873	membrane|transmembrane transport|metal ion transport|metal ion transmembrane transporter activity											GRMZM2G137535		Zm00001d027445	GRMZM2G089860	GRMZM2G013730
Zm00001d018809	GRMZM2G129357	269.946	31.1655	508.727	16.3234	4.57101e-07	4.20245e-05	Up	0.319121	3.46776	0.658068	22.3961	35.1569	16.1571		GO:0005515	protein binding											GRMZM2G028552		Zm00001d027445	GRMZM5G812553	GRMZM2G089860
Zm00001d014134	#N/A	266.185	30.8528	501.518	16.2552	0.0153902	0.163157	Up	0.234573	0.0965213	2.49713	32.8421	7.49176	6.93543		GO:0020037,GO:0005506,GO:0016705,GO:0004497,GO:0055114	heme binding|iron ion binding|oxidoreductase activity, acting on paired donors, with incorporation or reduction of molecular oxygen|monooxygenase activity|oxidation-reduction process											GRMZM2G089698		Zm00001d027446	GRMZM2G014366	GRMZM5G812553
Zm00001d048832	GRMZM2G453672	45.3798	5.33691	85.4226	16.006	0.00079829	0.0206182	Up	0.0631119	0.015058	0.144941	2.16911	0.631439	0.633845		GO:0005524,GO:0004672,GO:0006468,GO:0005515	ATP binding|protein kinase activity|protein phosphorylation|protein binding											GRMZM2G134134		Zm00001d027446	GRMZM2G176604	GRMZM2G014366
Zm00001d037073	GRMZM2G127251	48.3551	5.73149	90.9788	15.8735	1.26596e-05	0.000734138	Up	0.264788	0.167772	0.221497	6.01894	3.03449	2.87367		GO:0016747	transferase activity, transferring acyl groups other than amino-acyl groups											GRMZM2G459291		Zm00001d027447	GRMZM2G176585	GRMZM2G176604
Zm00001d004366	GRMZM2G334336	5.22929	0.625619	9.83296	15.7172	0.012908	0.14568	Up	0	0	0.0863375	0.864272	0.230515	0.135331		GO:0008152,GO:0016758	metabolic process|transferase activity, transferring hexosyl groups											GRMZM2G079127		Zm00001d027447	GRMZM5G899119	GRMZM2G176585
Zm00001d001960	GRMZM2G062396	51.1655	6.16197	96.169	15.6069	0.00424077	0.0674756	Up	0.245689	0.375956	0.212357	8.72573	2.37088	2.44341		GO:0046872,GO:0016491,GO:0055114	metal ion binding|oxidoreductase activity|oxidation-reduction process											GRMZM2G135165		Zm00001d027448	GRMZM2G176558	GRMZM5G899119
Zm00001d020968	GRMZM2G073548	19.0672	2.33212	35.8024	15.3518	3.23558e-07	3.12884e-05	Up	0	0.188372	0	2.24708	1.50954	0														GRMZM2G133430		Zm00001d027449	GRMZM2G022907	GRMZM2G176558
Zm00001d039384	AC233853.1_FG003	8.06429	0.999123	15.1295	15.1427	0.00351215	0.0589926	Up	0.0671896	0	0.113193	1.6071	0.381465	0.571526		GO:0020037,GO:0005506,GO:0016705,GO:0004497,GO:0055114	heme binding|iron ion binding|oxidoreductase activity, acting on paired donors, with incorporation or reduction of molecular oxygen|monooxygenase activity|oxidation-reduction process											GRMZM2G126261		Zm00001d027449	GRMZM2G176548	GRMZM2G022907
Zm00001d048333	GRMZM5G833332	83.824	10.3957	157.252	15.1266	0.0119627	0.138683	Up	0.172831	0.547193	0.432204	12.1603	2.62099	3.04064														GRMZM2G431039		Zm00001d027450	GRMZM2G476107	GRMZM2G176548
Zm00001d050864	AC214635.3_FG006	46.3874	5.7674	87.0075	15.0861	0.00058894	0.0163847	Up	2.0028	1.07871	0	21.7448	2.94906	4.19892														GRMZM2G137861		Zm00001d027450	GRMZM5G841360	GRMZM2G476107
Zm00001d022636	GRMZM2G154460	22.1998	2.77003	41.6296	15.0286	6.65586e-09	1.0324e-06	Up	0.108406	0.156411	0.0924456	2.35878	1.38857	1.39482														#N/A		Zm00001d027451	GRMZM2G176521	GRMZM5G841360
Zm00001d031419	AC213857.4_FG003	5.58587	0.714805	10.4569	14.6291	0.00849615	0.109213	Up	0.435207	0	0	1.57319	0.41663	1.29392		GO:0005509	calcium ion binding											GRMZM2G080839		Zm00001d027453	GRMZM2G055737	GRMZM2G176521
Zm00001d005698	GRMZM2G125775	238.539	30.9709	446.108	14.4041	1.36006e-11	3.51476e-09	Up	2.58285	1.89555	1.55703	30.4642	47.099	28.5857		GO:0008270	zinc ion binding											GRMZM2G010765		Zm00001d027454	GRMZM2G055704	GRMZM2G055737
Zm00001d020171	#N/A	7.40129	0.96692	13.8357	14.309	0.00112758	0.0261329	Up	0	0.0330151	0.0320768	0.398848	0.256797	0.392311		GO:0005515	protein binding											GRMZM2G030880		Zm00001d027455	GRMZM2G055575	GRMZM2G055704
Zm00001d013098	GRMZM2G124175	497.733	65.7536	929.712	14.1393	9.05941e-09	1.3451e-06	Up	0.344558	0.439887	0.189704	6.60176	4.11112	2.58631		GO:0016491,GO:0055114,GO:0046872,GO:0009055,GO:0003824,GO:0050660,GO:0016614,GO:0051537,GO:0051536,GO:0005506	oxidoreductase activity|oxidation-reduction process|metal ion binding|electron carrier activity|catalytic activity|flavin adenine dinucleotide binding|oxidoreductase activity, acting on CH-OH group of donors|2 iron, 2 sulfur cluster binding|iron-sulfur cluster binding|iron ion binding											#N/A		Zm00001d027456	GRMZM2G177508	GRMZM2G055575
Zm00001d008465	GRMZM2G113378	61.5241	8.16022	114.888	14.079	2.38011e-07	2.41181e-05	Up	0.102216	0.137362	0.153582	2.74238	1.22711	1.60358		GO:0005524,GO:0004672,GO:0006468	ATP binding|protein kinase activity|protein phosphorylation											GRMZM2G135385		Zm00001d027457	GRMZM2G325462	GRMZM2G177508
Zm00001d047864	#N/A	7.0447	0.938428	13.151	14.0138	0.0209381	0.200119	Up	0	0	0.0399938	0.26365	0.0392827	0.0371075		GO:0045454	cell redox homeostasis											GRMZM2G087233		Zm00001d027458	GRMZM2G025552	GRMZM2G325462
Zm00001d044608	GRMZM2G093175	4.90116	0.65411	9.1482	13.9857	0.00905948	0.114387	Up	0	0.0210851	0.0195538	0.212717	0.14364	0.101359		GO:0006529,GO:0004066	asparagine biosynthetic process|asparagine synthase (glutamine-hydrolyzing) activity											AC217947.4_FG002		Zm00001d027459	GRMZM2G025642	GRMZM2G025552
Zm00001d046342	GRMZM2G161472	398.466	53.9143	743.018	13.7815	0.0164535	0.170269	Up	0.472286	0.583666	1.31925	24.1101	5.25042	5.36328		GO:0020037,GO:0005506,GO:0016705,GO:0004497,GO:0055114	heme binding|iron ion binding|oxidoreductase activity, acting on paired donors, with incorporation or reduction of molecular oxygen|monooxygenase activity|oxidation-reduction process											GRMZM2G099092		na	AC217946.3_FG005	GRMZM2G025642
Zm00001d002434	GRMZM2G074743	49.707	6.74737	92.6666	13.7337	0.00181613	0.0366492	Up	0.06208	0.0583626	0.328732	3.96997	0.953233	1.31724		GO:0046872,GO:0016021,GO:0070469,GO:0055114,GO:0009916	metal ion binding|integral component of membrane|respiratory chain|oxidation-reduction process|alternative oxidase activity											AC214360.3_FG001		Zm00001d027460	GRMZM2G319022	AC217946.3_FG005
Zm00001d046236	GRMZM2G350918	7.35643	0.999123	13.7137	13.7258	0.0011546	0.0264939	Up	0.0157733	0	0.0278685	0.251537	0.133406	0.235024		GO:0016021,GO:0005524,GO:0004672,GO:0006468,GO:0005515	integral component of membrane|ATP binding|protein kinase activity|protein phosphorylation|protein binding											GRMZM2G354909		Zm00001d027461	GRMZM2G428184	GRMZM2G319022
Zm00001d017567	#N/A	13.8002	1.87686	25.7235	13.7056	9.82843e-06	0.000593231	Up	0	0	0.947904	5.50136	2.95686	3.82436		GO:0005524	ATP binding											GRMZM2G079632		Zm00001d027462	GRMZM2G129243	GRMZM2G428184
Zm00001d039098	#N/A	8.23182	1.12051	15.3431	13.693	0.00036994	0.0115669	Up	0	0	0	0.205489	0.670211	0.451386														GRMZM2G166767		na	GRMZM2G433095	GRMZM2G129243
Zm00001d036164	GRMZM2G039009	13.6479	1.87686	25.4189	13.5433	0.01419	0.154808	Up	0	0	0.325875	2.30689	0.453816	0.672846		GO:0008168	methyltransferase activity											GRMZM2G083130		Zm00001d027464	GRMZM2G371137	GRMZM2G433095
Zm00001d038695	GRMZM2G427618	11.5732	1.59254	21.5538	13.5343	5.42657e-05	0.00253651	Up	0	0.0635667	0.227788	1.29638	1.07508	0.819524		GO:0016491,GO:0055114	oxidoreductase activity|oxidation-reduction process											GRMZM2G058407		Zm00001d027466	GRMZM2G040158	GRMZM2G371137
Zm00001d005456	GRMZM2G047910	348.114	48.184	648.045	13.4494	2.03892e-27	5.14641e-24	Up	0.929098	3.41365	0.856425	18.7598	23.9844	23.2251		GO:0008152,GO:0016758	metabolic process|transferase activity, transferring hexosyl groups											GRMZM2G135739		Zm00001d027468	GRMZM2G105571	GRMZM2G040158
Zm00001d041768	GRMZM2G092169	41.7035	5.78045	77.6265	13.4292	3.13691e-12	9.467e-10	Up	0	0.0453611	0.342025	1.3704	1.81286	2.01099														GRMZM2G075283		Zm00001d027471	GRMZM2G065718	GRMZM2G105571
Zm00001d041580	GRMZM2G160840	18.6554	2.59166	34.7192	13.3965	0.000949564	0.0232558	Up	0	0	0.213349	2.12563	0.864644	0.627232														GRMZM2G125775		Zm00001d027472	GRMZM2G180951	GRMZM2G065718
Zm00001d013956	GRMZM2G305446	4.4607	0.625619	8.29577	13.2601	0.0226643	0.209999	Up	0	0	0.16876	1.13724	0.282448	0.188183	Aquaporin TIP3-1 [Source:Uniprot/SWISSPROT;Acc:Q9ATL7]	GO:0006810,GO:0016020,GO:0005215,GO:0016021,GO:0032586	transport|membrane|transporter activity|integral component of membrane|protein storage vacuole membrane											AC191009.3_FG004		Zm00001d027474	GRMZM2G057778	GRMZM2G180951
Zm00001d024839	GRMZM2G132093	1784.72	250.93	3318.51	13.2249	1.04282e-16	6.03208e-14	Up	12.2185	20.4045	17.8964	225.806	270.937	170.921	Glutathione S-transferase 4 [Source:Uniprot/SWISSPROT;Acc:P46420]	GO:0016740,GO:0005515	transferase activity|protein binding											GRMZM2G132875		Zm00001d027475	GRMZM2G341918	GRMZM2G057778
Zm00001d047845	GRMZM2G123107	31.1278	4.39849	57.8571	13.1539	0.00192453	0.0383869	Up	0.396058	0.0952404	0.259418	6.22473	2.60669	1.95044		GO:0004553,GO:0005975	hydrolase activity, hydrolyzing O-glycosyl compounds|carbohydrate metabolic process											GRMZM2G071087		Zm00001d027476	GRMZM2G086707	GRMZM2G341918
Zm00001d035162	GRMZM2G127328	175.908	25.5491	326.267	12.7702	0.0111784	0.132159	Up	1.11878	0.14898	1.02995	19.6468	4.13655	5.31733		GO:0016021	integral component of membrane											GRMZM2G144668		Zm00001d027477	GRMZM2G448701	GRMZM2G086707
Zm00001d000012	GRMZM2G049930	7.23511	1.05982	13.4104	12.6535	0.00137644	0.0301396	Up	0.114535	0	0.0525768	0.960426	0.736779	0.455373		GO:0005576,GO:0030145,GO:0045735	extracellular region|manganese ion binding|nutrient reservoir activity											GRMZM2G106703		Zm00001d027479	GRMZM2G143588	GRMZM2G448701
Zm00001d015140	GRMZM2G493549	140.198	20.5882	259.808	12.6193	0.000105296	0.00433011	Up	2.36506	0.59126	0.721102	2.65879	12.7348	10.2636														GRMZM2G153208		Zm00001d027480	GRMZM2G032852	GRMZM2G143588
Zm00001d017381	GRMZM2G170017	105.889	15.6372	196.14	12.5431	0.0108967	0.130016	Up	0.739072	0.177367	1.54766	22.8519	4.64649	7.0267														GRMZM2G073884		Zm00001d027481	GRMZM2G321053	GRMZM2G032852
Zm00001d052690	AC233883.1_FG006	20.2788	3.02215	37.5354	12.4201	0.018737	0.185997	Up	0.0925957	0.134402	0.159363	3.00439	0.528388	0.664003		GO:0016021	integral component of membrane											GRMZM2G103179		Zm00001d027483	GRMZM2G321041	GRMZM2G321053
Zm00001d029847	GRMZM2G373329	30.9425	4.62211	57.2629	12.3889	0.000335804	0.0107291	Up	0.113575	0	0.155765	1.52741	0.603228	0.689256		GO:0004842,GO:0016567	ubiquitin-protein transferase activity|protein ubiquitination											GRMZM2G113203		Zm00001d027484	GRMZM2G032409	GRMZM2G321041
Zm00001d043491	GRMZM2G474326	112.661	16.9219	208.401	12.3155	5.85637e-09	9.13495e-07	Up	1.484	2.1912	0.854471	14.0662	25.0177	16.7234		GO:0003677,GO:0006351,GO:0006355,GO:0005634,GO:0003700	DNA binding|transcription, DNA-templated|regulation of transcription, DNA-templated|nucleus|transcription factor activity, sequence-specific DNA binding											GRMZM2G177599		Zm00001d027486	GRMZM2G032219	GRMZM2G032409
Zm00001d044146	GRMZM2G147752	891	134.083	1647.92	12.2903	1.36288e-45	9.46008e-42	Up	1.18791	5.15149	2.03934	35.5461	34.8593	32.8979		GO:0020037,GO:0005506,GO:0016705,GO:0055114	heme binding|iron ion binding|oxidoreductase activity, acting on paired donors, with incorporation or reduction of molecular oxygen|oxidation-reduction process											GRMZM2G047434		Zm00001d027487	GRMZM2G031859	GRMZM2G032219
Zm00001d018206	GRMZM5G878558	39.0781	5.88508	72.2712	12.2804	0.00015476	0.00587161	Up	0.151338	0.0726466	0.0975222	2.7856	0.863611	1.04107		GO:0016491,GO:0055114,GO:0042128,GO:0030151,GO:0043546	oxidoreductase activity|oxidation-reduction process|nitrate assimilation|molybdenum ion binding|molybdopterin cofactor binding											GRMZM2G028129		Zm00001d027488	GRMZM5G845611	GRMZM2G031859
Zm00001d021693	GRMZM2G431021	8.89656	1.34042	16.4527	12.2743	0.000669794	0.0180552	Up	0.101791	0.0965123	0.176223	2.06745	0.571941	1.96696														GRMZM2G084779		Zm00001d027489	GRMZM2G008064	GRMZM5G845611
Zm00001d014335	GRMZM2G134597	4.1256	0.625619	7.62559	12.1889	0.0434888	0.315258	Up	0	0	0.0853907	0.608674	0.0464971	0.18495		GO:0020037,GO:0005506,GO:0016705,GO:0004497,GO:0055114	heme binding|iron ion binding|oxidoreductase activity, acting on paired donors, with incorporation or reduction of molecular oxygen|monooxygenase activity|oxidation-reduction process											GRMZM2G027640		Zm00001d027490	GRMZM2G008122	GRMZM2G008064
Zm00001d000017	GRMZM2G071390	6.98408	1.05982	12.9083	12.1798	0.00196392	0.0390044	Up	0.123873	0	0.0572617	0.657885	0.913279	0.443212		GO:0005576,GO:0030145,GO:0045735	extracellular region|manganese ion binding|nutrient reservoir activity											GRMZM2G019090		Zm00001d027490	GRMZM5G857724	GRMZM2G008122
Zm00001d022437	#N/A	77.2596	11.7584	142.761	12.1411	0.0102106	0.124585	Up	0.631072	0.202917	0.92645	11.6673	2.81907	3.68054		GO:0006355,GO:0003700,GO:0043565	regulation of transcription, DNA-templated|transcription factor activity, sequence-specific DNA binding|sequence-specific DNA binding											GRMZM2G027728		Zm00001d027492	GRMZM5G887276	GRMZM5G857724
Zm00001d043411	GRMZM2G022679	150.258	22.8826	277.634	12.133	0.00996616	0.122872	Up	0.536131	1.20885	0.952468	6.64532	19.9293	5.56163		GO:0016491,GO:0005506,GO:0055114	oxidoreductase activity|iron ion binding|oxidation-reduction process											GRMZM5G830250		Zm00001d027493	GRMZM2G137312	GRMZM5G887276
Zm00001d017014	GRMZM5G882364	15.4458	2.36804	28.5236	12.0453	0.00130181	0.0288005	Up	0	0.301718	0	3.51931	0.572102	2.32535		GO:0046872,GO:0030001	metal ion binding|metal ion transport											GRMZM2G022054		Zm00001d027494	GRMZM2G137367	GRMZM2G137312
Zm00001d004072	GRMZM2G052386	10.9731	1.68544	20.2608	12.0211	0.000213743	0.00760823	Up	0.0537808	0	0.0712625	0.666817	0.479077	0.199022		GO:0005524,GO:0004672,GO:0030246,GO:0006468	ATP binding|protein kinase activity|carbohydrate binding|protein phosphorylation											GRMZM2G032766		Zm00001d027496	GRMZM2G137374	GRMZM2G137367
Zm00001d039049	GRMZM2G117497	614.555	94.6573	1134.45	11.9848	0.00318158	0.0549121	Up	4.56696	4.39173	0.914425	12.6855	66.1175	40.0643		GO:0003677	DNA binding											GRMZM2G142383		Zm00001d027497	GRMZM2G137380	GRMZM2G137374
Zm00001d024961	GRMZM2G436448	121.314	18.707	223.921	11.9699	0.00282777	0.0503265	Up	0.41506	0.149833	0.474252	7.72151	2.18021	2.34009		GO:0005524,GO:0004672,GO:0006468	ATP binding|protein kinase activity|protein phosphorylation											GRMZM2G114988		Zm00001d027499	GRMZM2G092813	GRMZM2G137380
Zm00001d003353	GRMZM2G370507	9.44529	1.46181	17.4288	11.9227	0.000245101	0.00841192	Up	1.14104	0	0	3.16247	1.6594	2.3005														GRMZM2G102683		Zm00001d027500	GRMZM2G392863	GRMZM2G092813
Zm00001d040245	GRMZM2G108847	127.584	19.8493	235.318	11.8552	0.00093208	0.0229426	Up	1.05508	4.88797	2.40467	60.7147	17.2473	24.1352		GO:0006979,GO:0004867	response to oxidative stress|serine-type endopeptidase inhibitor activity											GRMZM2G111477		Zm00001d027501	GRMZM2G092916	GRMZM2G392863
Zm00001d014074	GRMZM2G123550	4.58903	0.714805	8.46326	11.84	0.0135249	0.149848	Up	0.0357838	0	0	0.377987	0.100701	0.166415		GO:0005515	protein binding											GRMZM2G044383		Zm00001d027502	GRMZM2G092923	GRMZM2G092916
Zm00001d020378	GRMZM2G151921	82.6247	12.9303	152.319	11.78	0.000527671	0.0151039	Up	0.378701	0.113761	0.25949	5.0412	1.67063	1.92823		GO:0046856	phosphatidylinositol dephosphorylation											GRMZM2G006745		Zm00001d027503	GRMZM2G392956	GRMZM2G092923
Zm00001d031257	GRMZM2G023847	133.074	20.9783	245.17	11.6868	0.0061291	0.0870018	Up	2.81842	0.241362	1.54047	37.5392	9.77702	10.7046		GO:0009055	electron carrier activity											AC233960.1_FG002		Zm00001d027504	GRMZM2G089056	GRMZM2G392956
Zm00001d048636	#N/A	6.68685	1.05982	12.3139	11.6189	0.00286592	0.050683	Up	0	0	0.0869126	0.835556	0.350288	0.258021														GRMZM2G162158		Zm00001d027505	GRMZM2G089092	GRMZM2G089056
Zm00001d009705	#N/A	95.1402	15.0817	175.199	11.6167	0.0208642	0.199551	Up	0.32696	0.156487	1.30704	15.249	3.76865	3.66215		GO:0016021,GO:0055085	integral component of membrane|transmembrane transport											GRMZM2G443668		Zm00001d027506	GRMZM2G020548	GRMZM2G089092
Zm00001d006069	GRMZM2G013781	171.808	27.3597	316.257	11.5592	0.000780922	0.0203399	Up	0.913555	0.517284	1.79262	18.4724	6.79155	6.63431		GO:0016491,GO:0008270,GO:0055114	oxidoreductase activity|zinc ion binding|oxidation-reduction process											GRMZM2G328171		Zm00001d027507	GRMZM2G409997	GRMZM2G020548
Zm00001d052405	GRMZM2G174834	4.68086	0.747008	8.6147	11.5323	0.0128697	0.145433	Up	0.0345099	0	0	0.137219	0.064218	0.108165		GO:0003677,GO:0006351,GO:0005634,GO:0003700,GO:0007275,GO:0006355	DNA binding|transcription, DNA-templated|nucleus|transcription factor activity, sequence-specific DNA binding|multicellular organism development|regulation of transcription, DNA-templated											GRMZM2G072612		Zm00001d027508	GRMZM2G109566	GRMZM2G409997
Zm00001d042244	GRMZM2G084779	634.492	101.333	1167.65	11.5229	0.00652459	0.0910328	Up	2.01273	0.14738	1.46339	27.9865	6.58892	8.10841		GO:0016021,GO:0016020,GO:0015079,GO:0071805	integral component of membrane|membrane|potassium ion transmembrane transporter activity|potassium ion transmembrane transport											GRMZM2G444560		Zm00001d027509	GRMZM2G409976	GRMZM2G109566
Zm00001d051810	GRMZM2G467934	13.2895	2.14813	24.4308	11.3731	0.0047204	0.0729661	Up	0	0	0	6.82003	0.785427	0.80497														GRMZM2G161472		Zm00001d027510	GRMZM2G109509	GRMZM2G409976
Zm00001d014060	GRMZM5G865298	109.007	17.6794	200.334	11.3315	1.05478e-05	0.000627111	Up	0.788871	0.200788	0.758183	11.6098	3.81608	7.83987		GO:0016021,GO:0006810,GO:0016020,GO:0005215	integral component of membrane|transport|membrane|transporter activity											GRMZM2G148495		Zm00001d027511	GRMZM2G090568	GRMZM2G109509
Zm00001d028303	GRMZM2G153536	264.24	43.1438	485.336	11.2493	8.23663e-06	0.000509332	Up	0.705824	0.464398	1.22813	17.9525	8.93076	7.33073		GO:0003824,GO:0008152,GO:0008652,GO:0009082,GO:0052656,GO:0052655,GO:0052654,GO:0004084,GO:0009081	catalytic activity|metabolic process|cellular amino acid biosynthetic process|branched-chain amino acid biosynthetic process|L-isoleucine transaminase activity|L-valine transaminase activity|L-leucine transaminase activity|branched-chain-amino-acid transaminase activity|branched-chain amino acid metabolic process											GRMZM2G471357		Zm00001d027512	GRMZM2G090738	GRMZM2G090568
Zm00001d033062	GRMZM5G842695	47.5727	7.77498	87.3704	11.2374	0.0125973	0.14317	Up	0.0609696	0.0292957	0.435117	4.86439	1.02533	1.42295		GO:0016021,GO:0016020,GO:0055085,GO:0015238,GO:0015297,GO:0006855	integral component of membrane|membrane|transmembrane transport|drug transmembrane transporter activity|antiporter activity|drug transmembrane transport											GRMZM2G029087		Zm00001d027514	GRMZM2G057158	GRMZM2G090738
Zm00001d044734	GRMZM5G855994	25.1543	4.12722	46.1813	11.1895	0.000234959	0.00815454	Up	0	0	0.392521	0.627643	0.453061	0.571552		GO:0004842,GO:0016567,GO:0005488	ubiquitin-protein transferase activity|protein ubiquitination|binding											GRMZM2G019177		Zm00001d027515	GRMZM2G040887	GRMZM2G057158
Zm00001d038993	GRMZM2G157218	17.8217	2.93296	32.7105	11.1527	1.80906e-06	0.000137237	Up	0.121721	0.116744	0.436368	3.43423	2.54067	2.04555														GRMZM2G149273		Zm00001d027516	GRMZM2G132019	GRMZM2G040887
Zm00001d038551	GRMZM2G140752	26.1183	4.30559	47.9309	11.1323	0.00820573	0.106763	Up	0	0	0.044637	0.761646	0.287793	0.142219		GO:0005524,GO:0004672,GO:0006468	ATP binding|protein kinase activity|protein phosphorylation											GRMZM5G893912		Zm00001d027517	GRMZM2G071349	GRMZM2G132019
Zm00001d045092	#N/A	11.5319	1.90535	21.1584	11.1047	0.00339112	0.0573312	Up	0	0	0.237329	1.59877	0.728797	0.548822		GO:0016747	transferase activity, transferring acyl groups other than amino-acyl groups											GRMZM2G180622		Zm00001d027517	GRMZM6G101378	GRMZM2G071349
Zm00001d050259	AC185254.4_FG002	99.8597	16.5304	183.189	11.0819	0.0442216	0.318086	Up	0.2421	0.0807241	0.314999	5.30217	0.822766	0.968726		GO:0016021,GO:0005524,GO:0006810,GO:0005215,GO:0016887	integral component of membrane|ATP binding|transport|transporter activity|ATPase activity											#N/A		Zm00001d027518	GRMZM2G007441	GRMZM6G101378
Zm00001d038549	GRMZM2G140721	38.5455	6.38931	70.7018	11.0656	0.000850511	0.0215442	Up	0.0916976	0.0437997	0.120391	2.37033	0.646917	0.979376		GO:0005524,GO:0004672,GO:0006468	ATP binding|protein kinase activity|protein phosphorylation											#N/A		Zm00001d027519	GRMZM2G096020	GRMZM2G007441
Zm00001d020401	#N/A	20.2904	3.36345	37.2174	11.0652	4.17325e-07	3.87526e-05	Up	0	0.0856587	0	0.472684	0.421133	0.67147		GO:0016491,GO:0008270,GO:0055114	oxidoreductase activity|zinc ion binding|oxidation-reduction process											GRMZM2G170017		Zm00001d027520	GRMZM2G095968	GRMZM2G096020
Zm00001d030981	GRMZM2G350793	172.491	28.6073	316.376	11.0593	0.00114889	0.0264284	Up	0.342201	0.202083	0.719285	8.77123	2.83808	2.97547		GO:0005524,GO:0004672,GO:0006468,GO:0005515	ATP binding|protein kinase activity|protein phosphorylation|protein binding											GRMZM2G181135		Zm00001d027522	GRMZM2G399948	GRMZM2G095968
Zm00001d048949	GRMZM2G117971	983.306	163.476	1803.14	11.03	0.010959	0.130535	Up	13.7536	3.47378	30.4011	366.222	89.5242	102.093		GO:0042742,GO:0050832	defense response to bacterium|defense response to fungus											#N/A		Zm00001d027523	GRMZM2G099598	GRMZM2G399948
Zm00001d019457	GRMZM2G002396	49.1244	8.185	90.0638	11.0035	0.0377387	0.290817	Up	1.10124	1.86575	0.948019	20.947	3.10148	6.44618		GO:0016021,GO:0005886	integral component of membrane|plasma membrane											GRMZM2G152417		Zm00001d027525	GRMZM2G099454	GRMZM2G099598
Zm00001d024207	#N/A	80.2084	13.3771	147.04	10.9919	0.0222778	0.207704	Up	0.0547831	0.0345919	0.603226	4.88929	1.20915	0.956615	(S)-beta-macrocarpene synthase [Source:Uniprot/SWISSPROT;Acc:Q5GJ60]	GO:0000287,GO:0016829,GO:0010333,GO:0008152	magnesium ion binding|lyase activity|terpene synthase activity|metabolic process											#N/A		Zm00001d027527	GRMZM2G092719	GRMZM2G099454
Zm00001d000018	GRMZM2G178817	9.876	1.65323	18.0988	10.9475	0.00154746	0.0326731	Up	0.0551107	0.0530839	0.152833	1.0761	0.56122	0.198026		GO:0030145,GO:0045735	manganese ion binding|nutrient reservoir activity											GRMZM2G315726		Zm00001d027530	GRMZM2G059428	GRMZM2G092719
Zm00001d008974	GRMZM2G072029	38.3525	6.44258	70.2624	10.9059	2.91905e-11	7.17235e-09	Up	0.134328	0.452065	0.344294	3.57531	4.023	3.00885		GO:0016021,GO:0005739,GO:0055085,GO:0005290,GO:0015189,GO:0006561,GO:0015181,GO:0043091,GO:0000064	integral component of membrane|mitochondrion|transmembrane transport|L-histidine transmembrane transporter activity|L-lysine transmembrane transporter activity|proline biosynthetic process|arginine transmembrane transporter activity|L-arginine import|L-ornithine transmembrane transporter activity											GRMZM2G129357		Zm00001d027531	GRMZM2G003538	GRMZM2G059428
Zm00001d025437	GRMZM2G136508	106.226	17.9235	194.528	10.8532	3.87757e-09	6.5249e-07	Up	0.249239	0	0.560184	4.38949	2.33821	2.16852		GO:0016021,GO:0016020,GO:0003333,GO:0015171	integral component of membrane|membrane|amino acid transmembrane transport|amino acid transmembrane transporter activity											GRMZM2G127418		Zm00001d027532	GRMZM2G110345	GRMZM2G003538
Zm00001d036965	GRMZM2G064382	1368.84	231.107	2506.57	10.8459	2.75727e-45	1.53111e-41	Up	9.16134	7.64452	5.06072	93.0909	68.2068	75.4596		GO:0016021,GO:0016020,GO:0055085,GO:0030001,GO:0046873,GO:0005385,GO:0071577	integral component of membrane|membrane|transmembrane transport|metal ion transport|metal ion transmembrane transporter activity|zinc ion transmembrane transporter activity|zinc II ion transmembrane transport											#N/A		Zm00001d027533	GRMZM2G410991	GRMZM2G110345
Zm00001d008299	GRMZM2G041308	3.87383	0.65411	7.09356	10.8446	0.0351005	0.278954	Up	0	0.0487189	0.0450971	0.357483	0.427717	0.188817		GO:0046872,GO:0020037,GO:0005576,GO:0042744,GO:0004601,GO:0006979,GO:0055114	metal ion binding|heme binding|extracellular region|hydrogen peroxide catabolic process|peroxidase activity|response to oxidative stress|oxidation-reduction process											GRMZM2G126062		Zm00001d027534	GRMZM2G110616	GRMZM2G410991
Zm00001d014001	GRMZM5G892700	16.9388	2.87227	31.0053	10.7947	0.0127971	0.144907	Up	0	0.076164	0.170234	1.58993	0.361716	0.623646														AC214635.3_FG006		Zm00001d027535	GRMZM2G465806	GRMZM2G110616
Zm00001d046460	GRMZM2G344993	458.676	77.7855	839.566	10.7934	2.30009e-37	1.06437e-33	Up	1.54858	5.03894	2.44604	41.4486	36.1869	30.8346		GO:0008152,GO:0016758	metabolic process|transferase activity, transferring hexosyl groups											GRMZM2G125653		Zm00001d027536	GRMZM2G048740	GRMZM2G465806
Zm00001d030548	GRMZM2G162158	190.316	32.3526	348.279	10.7651	0.0220911	0.206797	Up	2.03641	0.510345	0.619893	24.7339	4.81176	5.87322		GO:0046872,GO:0016491,GO:0055114,GO:0051213	metal ion binding|oxidoreductase activity|oxidation-reduction process|dioxygenase activity											GRMZM2G524937		Zm00001d027537	GRMZM2G093286	GRMZM2G048740
Zm00001d010284	GRMZM2G082959	64.4736	10.9675	117.98	10.7572	0.00595719	0.085789	Up	0.234515	0	0.994385	12.8306	2.69814	3.14446		GO:0008152,GO:0016787	metabolic process|hydrolase activity											GRMZM2G061732		Zm00001d027539	GRMZM2G119499	GRMZM2G093286
Zm00001d049096	GRMZM2G091839	14.883	2.55012	27.2159	10.6724	8.80361e-06	0.000541979	Up	0.205775	0	0	1.81904	1.47262	1.27124														GRMZM2G046297		Zm00001d027540	GRMZM2G096269	GRMZM2G119499
Zm00001d024458	GRMZM2G141133	5.43125	0.938428	9.92408	10.5752	0.0104915	0.126673	Up	0	0	0.178846	0.371453	0	0														AC148152.3_FG005		Zm00001d027541	GRMZM2G096247	GRMZM2G096269
Zm00001d025065	GRMZM2G340654	38.6029	6.7002	70.5055	10.5229	6.73005e-07	5.85768e-05	Up	0.265981	0	0.0870916	2.06684	0.953048	0.938568		GO:0005524,GO:0004672,GO:0006468	ATP binding|protein kinase activity|protein phosphorylation											#N/A		Zm00001d027542	GRMZM2G096153	GRMZM2G096247
Zm00001d027812	GRMZM5G850455	5.85484	1.0239	10.6858	10.4363	0.00855752	0.109746	Up	0	0.17924	0	0.328111	1.40057	0.175721		GO:0016021,GO:0008289,GO:0006869	integral component of membrane|lipid binding|lipid transport											GRMZM2G010933		Zm00001d022664	GRMZM2G092592	GRMZM2G096153
Zm00001d029829	GRMZM2G046848	93.3171	16.4604	170.174	10.3384	0.00180414	0.0365101	Up	0.344872	0.0758367	0.364166	5.21881	1.62115	1.91466		GO:0005524,GO:0004672,GO:0004842,GO:0006468,GO:0016567	ATP binding|protein kinase activity|ubiquitin-protein transferase activity|protein phosphorylation|protein ubiquitination											GRMZM2G173967		Zm00001d027544	GRMZM2G092481	GRMZM2G092592
Zm00001d031396	#N/A	3.88214	0.686313	7.07797	10.313	0.0311526	0.258349	Up	0.152133	0	0.134021	0.266352	0	0		GO:0005509	calcium ion binding											GRMZM2G002396		Zm00001d027546	GRMZM2G173372	GRMZM2G092481
Zm00001d042096	GRMZM2G428168	161.588	28.6631	294.512	10.275	1.19481e-14	4.95132e-12	Up	1.17136	2.26652	2.5921	20.0479	23.1402	12.8735		GO:0016740,GO:0005515	transferase activity|protein binding											AC197013.3_FG003		Zm00001d027548	GRMZM2G075701	GRMZM2G173372
Zm00001d007363	GRMZM2G015933	119.745	21.5204	217.97	10.1285	0.0127857	0.144907	Up	1.12609	0.189267	1.33796	18.9939	4.64945	4.9706		GO:0005515	protein binding											GRMZM2G068973		Zm00001d027549	GRMZM2G075870	GRMZM2G075701
Zm00001d030555	GRMZM2G303909	19.5536	3.52075	35.5864	10.1076	0.0327065	0.267796	Up	0.105846	0.016743	0.0489094	1.1903	0.162804	0.371119		GO:0005524,GO:0004672,GO:0004674,GO:0006468	ATP binding|protein kinase activity|protein serine/threonine kinase activity|protein phosphorylation											GRMZM2G044481		Zm00001d027550	GRMZM2G075901	GRMZM2G075870
Zm00001d023360	GRMZM2G156150	37.6697	6.78388	68.5556	10.1057	1.27915e-10	2.86417e-08	Up	0.0608734	0.266439	0.168373	1.63239	1.57792	1.81865		GO:0005524,GO:0004672,GO:0007165,GO:0006468	ATP binding|protein kinase activity|signal transduction|protein phosphorylation											GRMZM2G029951		Zm00001d027551	GRMZM2G399311	GRMZM2G075901
Zm00001d005766	GRMZM2G088819	46.6365	8.41413	84.859	10.0853	0.00174724	0.0356612	Up	0.498386	0.240294	0	3.64111	2.52112	1.61546		GO:0016021,GO:0005509	integral component of membrane|calcium ion binding											GRMZM2G180430		Zm00001d027552	GRMZM2G056488	GRMZM2G399311
Zm00001d002365	GRMZM2G416045	5.53036	0.999123	10.0616	10.0704	0.011181	0.132159	Up	0.05469	0	0.0961831	0.479419	0.307342	0.404902		GO:0008152,GO:0016758	metabolic process|transferase activity, transferring hexosyl groups											GRMZM2G428168		Zm00001d027553	GRMZM2G056377	GRMZM2G056488
Zm00001d010814	AC205471.4_FG007	226.668	41.1232	412.212	10.0238	0.0357594	0.282402	Up	3.50954	3.97529	7.42232	99.7441	26.2396	20.4296														GRMZM2G145069		Zm00001d027554	GRMZM2G475168	GRMZM2G056377
Zm00001d048189	GRMZM2G342907	42.2387	7.66904	76.8084	10.0154	2.40844e-07	2.42284e-05	Up	0.108888	0.103351	0.239546	2.25534	1.32744	0.976759		GO:0016021,GO:0016020,GO:0055085,GO:0008271,GO:0008272,GO:0015116	integral component of membrane|membrane|transmembrane transport|secondary active sulfate transmembrane transporter activity|sulfate transport|sulfate transmembrane transporter activity											GRMZM2G098102		Zm00001d027555	GRMZM2G176523	GRMZM2G475168
Zm00001d044122	GRMZM2G026930	23.859	4.33408	43.3839	10.0099	0.000232934	0.00810453	Up	0.143671	0.137599	0.293029	2.49571	2.11518	0.758384		GO:0003824,GO:0050662	catalytic activity|coenzyme binding											GRMZM2G127328		Zm00001d027556	GRMZM2G176499	GRMZM2G176523
Zm00001d034095	GRMZM2G118809	113.716	20.7399	206.691	9.96589	0.0211444	0.201398	Up	0.783491	0.168012	0.60875	11.4749	3.03427	1.96313		GO:0020037,GO:0005506,GO:0016705,GO:0055114	heme binding|iron ion binding|oxidoreductase activity, acting on paired donors, with incorporation or reduction of molecular oxygen|oxidation-reduction process											GRMZM2G112456		Zm00001d027557	GRMZM2G475059	GRMZM2G176499
Zm00001d037913	GRMZM2G309071	8.52922	1.56405	15.4944	9.9066	0.00841102	0.108519	Up	0	0	0.701469	1.42768	0.152167	0.911863														GRMZM2G336448		Zm00001d027558	GRMZM2G176397	GRMZM2G475059
Zm00001d047663	GRMZM2G152417	624.541	115.704	1133.38	9.79549	5.66963e-19	4.62992e-16	Up	0.568137	6.20346	0.815481	22.5548	28.0459	22.0992		GO:0003824,GO:0008152,GO:0016874	catalytic activity|metabolic process|ligase activity											GRMZM2G015933		Zm00001d027565	GRMZM2G474973	GRMZM2G176397
Zm00001d050705	GRMZM2G014356	56.7066	10.5852	102.828	9.71428	0.0109866	0.130751	Up	0.4102	1.17155	0.580245	3.00699	10.5354	5.616		GO:0016021	integral component of membrane											GRMZM2G112538		Zm00001d027568	GRMZM2G176131	GRMZM2G474973
Zm00001d008985	#N/A	36.0831	6.7591	65.4071	9.67689	3.23889e-10	6.56407e-08	Up	0.1514	0.339943	0.346443	3.46712	2.38073	1.85615		GO:0020037,GO:0005506,GO:0016705,GO:0055114	heme binding|iron ion binding|oxidoreductase activity, acting on paired donors, with incorporation or reduction of molecular oxygen|oxidation-reduction process											AC197541.3_FG009		Zm00001d027570	AC155624.2_FG006	GRMZM2G176131
Zm00001d011157	GRMZM2G338161	26.0675	4.91816	47.2169	9.60052	0.00110266	0.0256877	Up	0.0982576	0.0703442	0.044863	1.3908	0.520849	0.437431		GO:0005524,GO:0004672,GO:0006468	ATP binding|protein kinase activity|protein phosphorylation											GRMZM6G474234		Zm00001d027571	GRMZM5G833774	AC155624.2_FG006
Zm00001d044124	GRMZM2G114048	62.2818	11.7764	112.787	9.57742	8.27179e-15	3.47979e-12	Up	0.0509553	0.217884	0.0464912	1.45408	1.04095	1.46993														GRMZM2G047910		Zm00001d027572	GRMZM5G891266	GRMZM5G833774
Zm00001d042749	GRMZM2G074248	17.143	3.24948	31.0365	9.55121	0.0455083	0.3249	Up	0.337263	0	1.13715	7.8673	1.74443	2.33851														GRMZM2G339091		Zm00001d027573	AC155624.2_FG011	GRMZM5G891266
Zm00001d053733	GRMZM2G062600	24.8881	4.73607	45.0401	9.51	0.00611834	0.0869374	Up	0.213889	0.307965	0.274779	4.10184	1.32177	1.12099		GO:0004553,GO:0005975	hydrolase activity, hydrolyzing O-glycosyl compounds|carbohydrate metabolic process											GRMZM2G176307		Zm00001d027576	GRMZM2G018417	AC155624.2_FG011
Zm00001d036370	GRMZM2G145461	695	132.314	1257.69	9.50529	0.000384907	0.0119008	Up	6.57783	5.92639	14.0681	140.945	54.9348	50.7833		GO:0005975,GO:0004568,GO:0008061,GO:0016998,GO:0006032	carbohydrate metabolic process|chitinase activity|chitin binding|cell wall macromolecule catabolic process|chitin catabolic process											GRMZM2G349651		Zm00001d027577	GRMZM2G018410	GRMZM2G018417
Zm00001d031925	GRMZM2G171934	8.94353	1.7065	16.1805	9.48169	0.00127609	0.0284128	Up	0	0.277928	0	0.505979	0.863192	0.690043														#N/A		Zm00001d027581	GRMZM2G018579	GRMZM2G018410
Zm00001d013099	GRMZM2G124229	13.8593	2.64864	25.07	9.4652	5.15649e-05	0.00243073	Up	0	0	0.120043	1.77432	0.688885	0.274571		GO:0008152,GO:0016787	metabolic process|hydrolase activity											GRMZM2G056329		Zm00001d027582	GRMZM2G018706	GRMZM2G018579
Zm00001d038750	GRMZM2G029716	3.73657	0.714805	6.75834	9.45481	0.0476261	0.333587	Up	0.0364075	0.0347153	0	0.0318475	0.235553	0.196879		GO:0016020,GO:0016021	membrane|integral component of membrane											GRMZM2G013781		na	GRMZM2G068265	GRMZM2G018706
Zm00001d032240	GRMZM2G106558	82.2556	15.8894	148.622	9.35355	0.00287182	0.0507291	Up	0.396797	0	0.875564	10.201	3.09215	3.23758		GO:0003677	DNA binding											GRMZM2G056388		na	GRMZM2G325898	GRMZM2G068265
Zm00001d005002	GRMZM2G115658	374.969	72.6237	677.313	9.32634	1.94741e-32	6.00777e-29	Up	1.31976	1.76762	1.07836	14.0352	11.279	11.564		GO:0016021,GO:0055085	integral component of membrane|transmembrane transport											GRMZM2G153536		Zm00001d027584	GRMZM2G068336	GRMZM2G325898
Zm00001d049288	GRMZM2G161521	147.245	28.6189	265.872	9.29008	0.00654029	0.0911602	Up	0.724174	0.116586	1.55812	14.939	4.29719	4.50716														GRMZM2G151249		Zm00001d027585	GRMZM2G157510	GRMZM2G068336
Zm00001d041553	AC210168.4_FG003	22.729	4.45176	41.0063	9.21126	3.02356e-07	2.97692e-05	Up	0.391916	0.187651	0.170604	3.98971	2.45602	0.942456														GRMZM2G062357		Zm00001d027586	GRMZM2G703478	GRMZM2G157510
Zm00001d007803	GRMZM2G381766	10.1376	1.99453	18.2806	9.16536	0.039998	0.301778	Up	0.0229246	0.0439962	0.0639351	0.753224	0.128443	0.165366		GO:0005524,GO:0004672,GO:0030246,GO:0006468	ATP binding|protein kinase activity|carbohydrate binding|protein phosphorylation											GRMZM2G066441		Zm00001d027587	GRMZM2G152172	GRMZM2G703478
Zm00001d009938	GRMZM2G154881	4538.9	895.258	8182.54	9.13987	1.97612e-18	1.48289e-15	Up	26.5535	65.4206	25.7666	403.902	404.852	268.017		GO:0016787	hydrolase activity											GRMZM2G167336		Zm00001d027588	GRMZM2G009014	GRMZM2G152172
Zm00001d043512	GRMZM2G177883	61.469	12.1437	110.794	9.12364	2.26585e-05	0.00121216	Up	0.247583	0.157524	0.145823	2.80598	1.08494	1.37359		GO:0016021,GO:0005524,GO:0004672,GO:0004674,GO:0006468,GO:0005515	integral component of membrane|ATP binding|protein kinase activity|protein serine/threonine kinase activity|protein phosphorylation|protein binding											GRMZM2G021406		Zm00001d027589	GRMZM2G172758	GRMZM2G009014
Zm00001d013619	#N/A	11.7335	2.33955	21.1274	9.03054	0.0265366	0.232793	Up	0	0	0	0.412882	0.43584	0		GO:0009733	response to auxin											GRMZM2G168115		Zm00001d027590	GRMZM2G172751	GRMZM2G172758
Zm00001d033455	GRMZM2G039639	368.939	73.605	664.273	9.02484	0.00993514	0.1226	Up	2.02074	3.44334	2.73107	40.6473	11.4267	10.49														GRMZM2G431288		na	AC194863.3_FG007	GRMZM2G172751
Zm00001d044159	GRMZM2G129860	7514.1	1501.18	13527	9.01094	2.87384e-13	1.01003e-10	Up	7.33617	12.1547	5.237	69.5293	96.5116	60.8935		GO:0020037,GO:0005506,GO:0016705,GO:0004497,GO:0055114,GO:0016021	heme binding|iron ion binding|oxidoreductase activity, acting on paired donors, with incorporation or reduction of molecular oxygen|monooxygenase activity|oxidation-reduction process|integral component of membrane											GRMZM2G122431		Zm00001d027592	AC194863.3_FG006	AC194863.3_FG007
Zm00001d002996	#N/A	241.372	48.5698	434.174	8.93918	4.03164e-05	0.00195697	Up	1.06404	1.8137	1.04881	7.45685	17.772	10.5325		GO:0009523,GO:0015979,GO:0005509,GO:0009654,GO:0019898	photosystem II|photosynthesis|calcium ion binding|photosystem II oxygen evolving complex|extrinsic component of membrane											GRMZM2G166870		Zm00001d027593	GRMZM2G472167	AC194863.3_FG006
Zm00001d021897	GRMZM2G443829	11.746	2.36433	21.1278	8.93606	0.000217955	0.00770185	Up	0.0334717	0.129433	0	0.834166	0.569486	0.379575		GO:0016021,GO:0005524,GO:0004672,GO:0030246,GO:0006468	integral component of membrane|ATP binding|protein kinase activity|carbohydrate binding|protein phosphorylation											GRMZM5G877500		Zm00001d027594	AC194863.3_FG004	GRMZM2G472167
Zm00001d008853	GRMZM2G333582	7.11716	1.43332	12.801	8.931	0.00349404	0.0587951	Up	0.128743	0	0.0376974	0.639319	0.080413	0.199436														GRMZM2G092817		Zm00001d027595	GRMZM2G171181	AC194863.3_FG004
Zm00001d043665	GRMZM2G131099	131.699	26.7831	236.616	8.83451	0.000611123	0.0168798	Up	3.42629	0.861869	6.18282	38.6087	15.4748	16.6215		GO:0016021	integral component of membrane											GRMZM2G057067		Zm00001d027596	GRMZM2G171324	GRMZM2G171181
Zm00001d034104	GRMZM2G039278	671.876	137.112	1206.64	8.80043	1.95267e-19	1.69425e-16	Up	4.68556	20.9194	2.75083	72.2278	97.1557	69.1133		GO:0020037,GO:0005506,GO:0016705,GO:0055114	heme binding|iron ion binding|oxidoreductase activity, acting on paired donors, with incorporation or reduction of molecular oxygen|oxidation-reduction process											GRMZM2G089506		Zm00001d027597	GRMZM2G171333	GRMZM2G171324
Zm00001d012510	GRMZM2G010468	245.082	50.0943	440.07	8.78484	3.72531e-27	8.61945e-24	Up	0.59592	1.15287	0.671261	8.34466	7.8976	6.47976		GO:0020037,GO:0005506,GO:0016705,GO:0055114	heme binding|iron ion binding|oxidoreductase activity, acting on paired donors, with incorporation or reduction of molecular oxygen|oxidation-reduction process											GRMZM2G139689		Zm00001d027598	GRMZM2G474258	GRMZM2G171333
Zm00001d052435	GRMZM2G336448	1056.16	217.062	1895.27	8.73144	1.38761e-05	0.000797658	Up	2.29339	4.76725	2.45184	19.1722	38.8073	22.1577		GO:0016021,GO:0055085	integral component of membrane|transmembrane transport											GRMZM2G074687		Zm00001d027599	GRMZM2G323830	GRMZM2G474258
Zm00001d043286	GRMZM2G057140	25.9353	5.35427	46.5163	8.6877	0.00937371	0.117446	Up	0.0110826	0.0208756	0.020739	0.434013	0.121199	0.084787		GO:0003993	acid phosphatase activity											GRMZM2G082199		Zm00001d027601	GRMZM2G062946	GRMZM2G323830
Zm00001d037528	GRMZM2G369629	7.82023	1.62103	14.0194	8.64848	0.00734683	0.0986467	Up	0	0.135763	0.185961	1.67248	0.531433	0.398574														GRMZM2G159587		Zm00001d027605	GRMZM2G057694	GRMZM2G062946
Zm00001d048416	GRMZM5G891656	54.3648	11.2957	97.4338	8.62572	0.0015737	0.0330513	Up	0.455741	0.146021	0.786184	7.23659	3.05918	2.248		GO:0016491,GO:0004497,GO:0055114,GO:0071949	oxidoreductase activity|monooxygenase activity|oxidation-reduction process|FAD binding											GRMZM2G143625		Zm00001d027606	GRMZM2G066805	GRMZM2G057694
Zm00001d033320	GRMZM2G066067	18.9075	3.93208	33.883	8.61706	0.00217158	0.0418318	Up	0.115419	0.0556404	0.297503	2.53973	0.983631	0.766153		GO:0008152,GO:0016758	metabolic process|transferase activity, transferring hexosyl groups											GRMZM2G041068		Zm00001d027610	GRMZM2G046888	GRMZM2G066805
Zm00001d008570	GRMZM2G022972	28.02	5.86964	50.1703	8.54743	0.000154734	0.00587161	Up	0	0.0795767	0.142134	1.05418	0.700627	0.507583		GO:0006950,GO:0005516	response to stress|calmodulin binding											GRMZM2G376103		Zm00001d027611	GRMZM2G046919	GRMZM2G046888
Zm00001d053554	GRMZM2G117706	698.791	146.754	1250.83	8.52327	3.19518e-12	9.53917e-10	Up	12.3217	7.48292	15.1607	145.588	85.2729	84.8917		GO:0046872,GO:0020037,GO:0005576,GO:0042744,GO:0004601,GO:0006979,GO:0055114	metal ion binding|heme binding|extracellular region|hydrogen peroxide catabolic process|peroxidase activity|response to oxidative stress|oxidation-reduction process											GRMZM2G161459		Zm00001d027612	GRMZM2G046932	GRMZM2G046919
Zm00001d017425	GRMZM2G135385	71.8174	15.0915	128.543	8.51762	0.0148873	0.159409	Up	2.90479	0.547526	2.37451	32.679	7.72121	10.0052		GO:0046872,GO:0016021,GO:0020037	metal ion binding|integral component of membrane|heme binding											GRMZM2G179528		Zm00001d027613	GRMZM2G047002	GRMZM2G046932
Zm00001d046745	GRMZM2G041068	65.173	13.7214	116.625	8.49951	0.00548017	0.0807198	Up	0.901943	1.24679	0.710257	16.2719	4.09721	5.48613		GO:0016021	integral component of membrane											GRMZM2G475293		Zm00001d027615	AC190799.2_FG010	GRMZM2G047002
Zm00001d037968	GRMZM2G423863	19.7823	4.17486	35.3898	8.47688	0.0121768	0.140286	Up	0.782814	0	0.400119	8.07591	2.35764	2.48701														GRMZM2G104390		Zm00001d027616	GRMZM2G450071	AC190799.2_FG010
Zm00001d009945	GRMZM2G018666	7.41109	1.56405	13.2581	8.47681	0.0274395	0.237118	Up	0	0	0	1.82199	0	1.11202		GO:0016021	integral component of membrane											GRMZM2G114322		Zm00001d027617	GRMZM2G149254	GRMZM2G450071
Zm00001d049121	GRMZM2G333659	83.1383	17.6089	148.668	8.44275	1.17293e-15	5.61491e-13	Up	0.102698	0.0561923	0.471463	2.03822	1.69076	1.49111		GO:0043531	ADP binding											GRMZM2G031311		Zm00001d027618	GRMZM2G149257	GRMZM2G149254
Zm00001d022457	GRMZM2G427815	119.091	25.2377	212.944	8.43753	4.52534e-08	5.50747e-06	Up	0.582209	0.338637	2.87747	14.0672	7.77922	9.24199		GO:0046872,GO:0020037,GO:0005576,GO:0042744,GO:0004601,GO:0006979,GO:0055114	metal ion binding|heme binding|extracellular region|hydrogen peroxide catabolic process|peroxidase activity|response to oxidative stress|oxidation-reduction process											GRMZM2G138770		Zm00001d027619	GRMZM2G450125	GRMZM2G149257
Zm00001d028349	GRMZM2G116902	13.5694	2.87598	24.2629	8.43639	0.00286537	0.050683	Up	0.0534551	0	0.374236	2.18147	0.810452	0.807063		GO:0046872,GO:0020037,GO:0005576,GO:0042744,GO:0004601,GO:0006979,GO:0055114	metal ion binding|heme binding|extracellular region|hydrogen peroxide catabolic process|peroxidase activity|response to oxidative stress|oxidation-reduction process											GRMZM2G123428		Zm00001d027620	GRMZM2G343767	GRMZM2G450125
Zm00001d011886	GRMZM2G061403	41.5113	8.8026	74.22	8.4316	0.00258401	0.0472318	Up	0.369872	0.117863	1.15231	7.87158	2.78516	3.11759		GO:0004553,GO:0005975	hydrolase activity, hydrolyzing O-glycosyl compounds|carbohydrate metabolic process											GRMZM2G123654		Zm00001d027621	GRMZM2G041899	GRMZM2G343767
Zm00001d020702	GRMZM2G009045	73.8637	15.6831	132.044	8.41953	0.0139796	0.153235	Up	0.261415	0.331747	0.691514	8.053	1.72919	2.35156		GO:0016021,GO:0006810	integral component of membrane|transport											GRMZM2G051219		Zm00001d027622	GRMZM2G355846	GRMZM2G041899
Zm00001d029373	#N/A	45.0205	9.56505	80.4759	8.41354	5.01092e-11	1.18913e-08	Up	0.233549	0.173212	0.220286	2.49642	1.79624	1.36228		GO:0006508,GO:0004185	proteolysis|serine-type carboxypeptidase activity											GRMZM2G173684		Zm00001d027622	GRMZM5G849919	GRMZM2G355846
Zm00001d021929	GRMZM2G102550	28.0557	5.98731	50.1242	8.37173	0.0145631	0.157272	Up	0.205872	0.195962	0.401958	4.03914	1.19718	1.18546		GO:0008299	isoprenoid biosynthetic process											GRMZM2G150893		Zm00001d027623	GRMZM2G054111	GRMZM5G849919
Zm00001d017976	GRMZM2G151204	26.3186	5.61752	47.0197	8.37018	0.0202317	0.195521	Up	0.233125	0.0746744	0.465119	4.61907	1.63484	0.89618		GO:0004842,GO:0016567,GO:0005488	ubiquitin-protein transferase activity|protein ubiquitination|binding											#N/A		Zm00001d027624	GRMZM5G823004	GRMZM2G054111
Zm00001d022549	#N/A	4.814	1.02761	8.60039	8.36928	0.0411327	0.306624	Up	0	0.0761554	0.0675187	1.334	0.446421	0.224121		GO:0005524,GO:0004672,GO:0006468	ATP binding|protein kinase activity|protein phosphorylation											GRMZM2G061723		Zm00001d027625	GRMZM5G820122	GRMZM5G823004
Zm00001d032368	GRMZM2G466563	86.6648	18.6346	154.695	8.30149	4.00446e-16	2.13815e-13	Up	0.318019	0.076229	0.745368	4.01562	2.89105	2.69005		GO:0006950,GO:0005516	response to stress|calmodulin binding											GRMZM2G369485		Zm00001d027626	GRMZM5G860938	GRMZM5G820122
Zm00001d000414	#N/A	13.3887	2.89513	23.8822	8.2491	0.000127761	0.00508938	Up	0.20733	0	0.0317539	0.453229	0.731048	0.736838		GO:0043531	ADP binding											GRMZM2G161521		na	GRMZM5G872399	GRMZM5G860938
Zm00001d037471	GRMZM2G365768	4.33527	0.938428	7.73211	8.23943	0.0379146	0.291432	Up	0	0	0.0438951	0.228194	0.0654597	0.102984		GO:0005515	protein binding											GRMZM2G416120		Zm00001d027627	GRMZM2G107686	GRMZM5G872399
Zm00001d050323	GRMZM2G114988	422.374	91.4806	753.267	8.23417	1.03893e-30	2.88459e-27	Up	2.03451	3.43053	1.32469	25.7114	20.2713	16.4741		GO:0020037,GO:0005506,GO:0016705,GO:0055114	heme binding|iron ion binding|oxidoreductase activity, acting on paired donors, with incorporation or reduction of molecular oxygen|oxidation-reduction process											GRMZM2G169149		Zm00001d027629	GRMZM2G107679	GRMZM2G107686
Zm00001d013151	GRMZM2G112548	6.43921	1.40112	11.4773	8.19153	0.0111341	0.131858	Up	0.0979039	0.0482628	0.0437462	0.919542	0.36893	0.234096		GO:0003677,GO:0006351,GO:0006355,GO:0005634	DNA binding|transcription, DNA-templated|regulation of transcription, DNA-templated|nucleus											GRMZM2G088778		Zm00001d027630	GRMZM2G107532	GRMZM2G107679
Zm00001d035445	GRMZM2G111579	1855.83	405.342	3306.32	8.15686	4.7603e-09	7.77469e-07	Up	3.56191	4.41743	3.29168	36.989	39.2605	19.6514		GO:0004357,GO:0006750,GO:0042398	glutamate-cysteine ligase activity|glutathione biosynthetic process|cellular modified amino acid biosynthetic process											GRMZM2G018018		na	GRMZM2G407869	GRMZM2G107532
Zm00001d013809	#N/A	1437.88	314.755	2561	8.1365	2.55785e-36	1.01455e-32	Up	3.62753	21.1961	6.74578	100.009	81.2406	79.4612		GO:0016020,GO:0055085,GO:0015238,GO:0015297,GO:0006855	membrane|transmembrane transport|drug transmembrane transporter activity|antiporter activity|drug transmembrane transport											GRMZM2G160710		Zm00001d027633	GRMZM2G103599	GRMZM2G407869
Zm00001d045210	GRMZM2G074611	285.233	62.593	507.872	8.11388	0.00418906	0.0669213	Up	5.15095	2.61689	8.83851	79.5616	22.4005	29.2249														GRMZM2G113052		Zm00001d027633	GRMZM2G113174	GRMZM2G103599
Zm00001d003247	GRMZM2G102183	23.743	5.23097	42.2551	8.07788	0.00250031	0.046197	Up	0.143507	0.137656	0.124142	1.90635	0.646	0.60874		GO:0003824,GO:0006099,GO:0004474,GO:0006097	catalytic activity|tricarboxylic acid cycle|malate synthase activity|glyoxylate cycle											GRMZM2G107380		Zm00001d027633	GRMZM2G170567	GRMZM2G113174
Zm00001d015139	GRMZM2G318375	343.417	75.9308	610.903	8.04553	0.000894947	0.022227	Up	0.415258	0.681967	0.376415	1.39488	4.31336	4.57588														#N/A		Zm00001d027635	GRMZM2G113239	GRMZM2G170567
Zm00001d032265	GRMZM2G324999	23.2257	5.14178	41.3096	8.0341	7.81047e-07	6.59142e-05	Up	0.143378	0	0	1.2683	0.969091	1.24858		GO:0006355,GO:0003700,GO:0043565	regulation of transcription, DNA-templated|transcription factor activity, sequence-specific DNA binding|sequence-specific DNA binding											GRMZM2G087662		Zm00001d027636	GRMZM2G415390	GRMZM2G113239
Zm00001d013830	GRMZM5G851862	42.2623	9.36249	75.1621	8.028	0.00129055	0.0286429	Up	0.350587	0.486637	0.172136	4.8034	1.56902	1.97758		GO:0020037,GO:0005506,GO:0016705,GO:0004497,GO:0055114	heme binding|iron ion binding|oxidoreductase activity, acting on paired donors, with incorporation or reduction of molecular oxygen|monooxygenase activity|oxidation-reduction process											GRMZM2G111143		Zm00001d027637	GRMZM2G415343	GRMZM2G415390
Zm00001d043025	GRMZM2G148087	89.9358	19.9267	159.945	8.02668	3.58202e-11	8.72411e-09	Up	0.543168	0.517963	0.414793	6.16297	3.48954	3.6012		GO:0006355,GO:0003700,GO:0043565	regulation of transcription, DNA-templated|transcription factor activity, sequence-specific DNA binding|sequence-specific DNA binding											GRMZM2G157120		Zm00001d027638	GRMZM2G406662	GRMZM2G415343
Zm00001d005823	GRMZM2G125482	24.2725	5.37845	43.1666	8.02584	0.000490916	0.0142875	Up	0	0	0.382156	1.92886	0.753176	1.09026		GO:0020037,GO:0005506,GO:0016705,GO:0055114,GO:0004497	heme binding|iron ion binding|oxidoreductase activity, acting on paired donors, with incorporation or reduction of molecular oxygen|oxidation-reduction process|monooxygenase activity											GRMZM2G035821		Zm00001d027638	GRMZM2G470309	GRMZM2G406662
Zm00001d021680	GRMZM2G468610	676.384	150.105	1202.66	8.01216	6.54668e-16	3.24587e-13	Up	1.42129	2.12555	1.9059	12.7285	15.854	13.3037														GRMZM2G147882		Zm00001d027639	GRMZM2G142214	GRMZM2G470309
Zm00001d002374	#N/A	14.2798	3.18508	25.3746	7.9667	0.000133718	0.00526465	Up	0	0.192101	0.177021	2.79092	1.10093	0.737259		GO:0009733	response to auxin											GRMZM2G085974		Zm00001d027639	GRMZM5G827810	GRMZM2G142214
Zm00001d001900	GRMZM2G010435	23.6209	5.29358	41.9482	7.92436	0.0267794	0.23364	Up	0.0286888	0.220516	0.180797	2.11684	0.296057	0.682748		GO:0006508,GO:0008234	proteolysis|cysteine-type peptidase activity											GRMZM2G100412		na	AC204383.2_FG002	GRMZM5G827810
Zm00001d001943	GRMZM2G018716	81.7982	18.3372	145.259	7.92154	0.00162548	0.0338064	Up	0.347499	0.0847872	0.413653	3.9406	1.97501	0.998774		GO:0004553,GO:0005975	hydrolase activity, hydrolyzing O-glycosyl compounds|carbohydrate metabolic process											GRMZM2G073123		Zm00001d027642	GRMZM2G315692	AC204383.2_FG002
Zm00001d014102	GRMZM2G347174	111.141	24.9261	197.357	7.91768	0.00178834	0.0363229	Up	0.180657	0.696606	0.713622	7.83729	2.32023	3.4886		GO:0016021,GO:0055085	integral component of membrane|transmembrane transport											GRMZM2G427815		Zm00001d027642	GRMZM2G435276	GRMZM2G315692
Zm00001d029743	#N/A	25.272	5.67259	44.8714	7.91021	3.53075e-06	0.000245078	Up	1.54233	0	0.651017	3.79188	6.00797	6.80117														GRMZM2G474326		Zm00001d027643	GRMZM2G016338	GRMZM2G435276
Zm00001d035592	GRMZM2G147804	7.56584	1.7065	13.4252	7.86706	0.00488644	0.0747916	Up	0	0.226985	0	0.889537	0.66891	0.553585														GRMZM2G115658		Zm00001d027643	GRMZM2G332548	GRMZM2G016338
Zm00001d003091	GRMZM2G111975	27.9077	6.30012	49.5153	7.85943	0.00126537	0.0282324	Up	0.113001	0	0.478711	3.56711	1.97043	1.12035		GO:0016021,GO:0006486,GO:0005794,GO:0008373	integral component of membrane|protein glycosylation|Golgi apparatus|sialyltransferase activity											GRMZM2G169033		Zm00001d027643	GRMZM5G816155	GRMZM2G332548
Zm00001d043988	GRMZM2G453805	2436.1	550.175	4322.03	7.85574	0.00427713	0.0680152	Up	42.8383	20.8429	53.6343	491.227	149.101	172.826		GO:0004553,GO:0005975	hydrolase activity, hydrolyzing O-glycosyl compounds|carbohydrate metabolic process											GRMZM5G822593		Zm00001d027645	GRMZM2G009818	GRMZM5G816155
Zm00001d021497	GRMZM2G117603	52.1887	11.7869	92.5904	7.85535	9.48248e-05	0.00393544	Up	0.332609	0.106574	0.150353	2.70542	1.35067	1.93891		GO:0005622,GO:0030042,GO:0015629,GO:0003779	intracellular|actin filament depolymerization|actin cytoskeleton|actin binding											GRMZM2G031945		Zm00001d027646	GRMZM2G178571	GRMZM2G009818
Zm00001d017607	GRMZM2G702159	176.833	40.0244	313.641	7.83624	6.60447e-22	7.97275e-19	Up	0.395409	0.206976	0.779006	3.60781	2.53022	3.43257		GO:0006508,GO:0008233,GO:0004222,GO:0071586,GO:0005515	proteolysis|peptidase activity|metalloendopeptidase activity|CAAX-box protein processing|protein binding											GRMZM2G084727		Zm00001d027647	GRMZM2G062933	GRMZM2G178571
Zm00001d014748	GRMZM2G050450	85.5084	19.3835	151.633	7.82279	0.000851216	0.0215442	Up	0.433892	0.166621	1.3887	11.0605	3.37749	4.38056		GO:0016747	transferase activity, transferring acyl groups other than amino-acyl groups											GRMZM2G180328		Zm00001d027648	GRMZM2G062841	GRMZM2G062933
Zm00001d046834	GRMZM2G060311	17.0985	3.89054	30.3064	7.78975	0.00909674	0.114649	Up	0.833495	0.397531	0.244141	7.58288	2.46587	1.90509		GO:0016021	integral component of membrane											AC193632.2_FG002		Zm00001d027649	GRMZM2G062724	GRMZM2G062841
Zm00001d021896	GRMZM2G443843	13.103	2.99366	23.2124	7.75385	0.00598274	0.085943	Up	0.0728219	0.0702431	0.157242	1.38645	0.310578	0.55416		GO:0016021,GO:0005524,GO:0004672,GO:0030246,GO:0006468	integral component of membrane|ATP binding|protein kinase activity|carbohydrate binding|protein phosphorylation											GRMZM2G382785		Zm00001d027651	GRMZM2G062635	GRMZM2G062724
Zm00001d051119	GRMZM2G047167	66.0891	15.291	116.887	7.64417	5.45321e-12	1.57717e-09	Up	0.0578984	0.229242	0.191895	1.07786	1.44744	0.983456		GO:0008270,GO:0005515	zinc ion binding|protein binding											GRMZM6G310687		Zm00001d027655	GRMZM2G038485	GRMZM2G062635
Zm00001d020628	GRMZM2G431288	157.137	36.4256	277.848	7.62782	0.00600588	0.0860884	Up	0.956571	0.333722	2.15572	17.4501	4.83465	6.22922		GO:0020037,GO:0005506,GO:0016705,GO:0004497,GO:0055114	heme binding|iron ion binding|oxidoreductase activity, acting on paired donors, with incorporation or reduction of molecular oxygen|monooxygenase activity|oxidation-reduction process											GRMZM2G452896		Zm00001d027656	GRMZM2G339563	GRMZM2G038485
Zm00001d031407	#N/A	126.23	29.273	223.187	7.62434	0.000227055	0.0079298	Up	0.457624	0.209018	0.49037	4.39072	1.55932	1.84153		GO:0005524,GO:0004672,GO:0030247,GO:0006468	ATP binding|protein kinase activity|polysaccharide binding|protein phosphorylation											GRMZM2G475948		Zm00001d027657	AC186233.3_FG007	GRMZM2G339563
Zm00001d003675	GRMZM2G177561	41.508	9.6431	73.3729	7.60885	0.0172575	0.175901	Up	0.207132	0.590452	0.281015	1.82115	5.84484	1.65183		GO:0009435,GO:0004514	NAD biosynthetic process|nicotinate-nucleotide diphosphorylase (carboxylating) activity											GRMZM2G361256		Zm00001d027658	GRMZM2G087966	AC186233.3_FG007
Zm00001d036016	GRMZM2G069335	4.55565	1.05982	8.05149	7.59705	0.0307585	0.256075	Up	0	0	0	0	0	0		GO:0005515	protein binding											GRMZM2G120016		Zm00001d027659	GRMZM2G087918	GRMZM2G087966
Zm00001d020492	GRMZM2G125653	212.348	49.4132	375.282	7.59477	2.34344e-08	3.17394e-06	Up	0.571723	0.31462	5.05414	21.638	12.8075	12.3587		GO:0006355,GO:0003700,GO:0043565	regulation of transcription, DNA-templated|transcription factor activity, sequence-specific DNA binding|sequence-specific DNA binding											GRMZM5G871347		Zm00001d027663	GRMZM5G873209	GRMZM2G087918
Zm00001d036402	GRMZM2G065888	47.8075	11.1347	84.4804	7.58711	1.94815e-10	4.2037e-08	Up	0.0631646	0.158955	0.323248	1.39762	0.989248	0.719393														GRMZM2G030272		na	GRMZM2G117855	GRMZM5G873209
Zm00001d052210	GRMZM2G169628	7.17864	1.67801	12.6793	7.55612	0.00709383	0.0963131	Up	0	0.206518	0	0.951333	0.545317	0.405639		GO:0008152,GO:0016758	metabolic process|transferase activity, transferring hexosyl groups											GRMZM2G035755		Zm00001d027665	GRMZM2G086093	GRMZM2G117855
Zm00001d007381	GRMZM2G160515	34.2369	8.04625	60.4276	7.51004	1.73237e-08	2.41705e-06	Up	0.427221	0.274276	0.84697	5.33812	2.71841	2.75457														GRMZM2G010783		Zm00001d027665	GRMZM2G418037	GRMZM2G086093
Zm00001d008845	#N/A	5.31394	1.25124	9.37665	7.4939	0.0282474	0.241766	Up	0	0	0.0400999	0.298422	0.19254	0.148599		GO:0003676,GO:0000398,GO:0005681	nucleic acid binding|mRNA splicing, via spliceosome|spliceosomal complex											GRMZM2G175401		Zm00001d027665	GRMZM2G439049	GRMZM2G418037
Zm00001d010828	#N/A	43.7991	10.3177	77.2805	7.4901	0.0183112	0.183079	Up	0.122238	0.116527	0.204501	2.31578	0.753471	0.487895		GO:0006629	lipid metabolic process											GRMZM2G059073		Zm00001d027667	GRMZM2G028521	GRMZM2G439049
Zm00001d014282	GRMZM2G474555	23.0743	5.44717	40.7014	7.47203	2.06741e-06	0.00015348	Up	1.11868	2.19708	0	6.93383	6.31394	3.70415														GRMZM2G457287		Zm00001d027672	GRMZM2G142938	GRMZM2G028521
Zm00001d036539	GRMZM2G099092	80.5452	19.0614	142.029	7.45114	0.0204407	0.196777	Up	1.75965	0.676692	3.29077	31.5373	7.29303	9.83819														GRMZM2G082959		Zm00001d027673	GRMZM2G150925	GRMZM2G142938
Zm00001d045051	GRMZM2G478553	9.86876	2.33955	17.398	7.43647	0.00158964	0.0332854	Up	0.113569	0.107517	0.0958679	1.68348	0.848626	0.630566		GO:0016021,GO:0008270,GO:0005515	integral component of membrane|zinc ion binding|protein binding											GRMZM2G441347		Zm00001d027674	GRMZM2G150915	GRMZM2G150925
Zm00001d029247	GRMZM2G140989	33.4595	7.95144	58.9676	7.41596	0.0191687	0.189402	Up	0.30768	0.0268655	0.267655	2.85706	0.797718	0.742375		GO:0016021,GO:0005488	integral component of membrane|binding											GRMZM2G069542		Zm00001d027675	GRMZM2G150867	GRMZM2G150915
Zm00001d021647	#N/A	267.026	63.6587	470.394	7.38932	0.0251612	0.225209	Up	0.570784	0.069252	0.547671	6.10737	1.28672	1.72828		GO:0005524,GO:0016020,GO:0016887	ATP binding|membrane|ATPase activity											GRMZM2G178079		Zm00001d027676	GRMZM2G043799	GRMZM2G150867
Zm00001d011643	GRMZM2G316904	39.9152	9.52351	70.3069	7.38245	0.00107993	0.025389	Up	0.162659	0.0881491	0.0541581	1.30045	0.438875	0.496682		GO:0016021,GO:0005524,GO:0004672,GO:0004674,GO:0006468,GO:0005515	integral component of membrane|ATP binding|protein kinase activity|protein serine/threonine kinase activity|protein phosphorylation|protein binding											GRMZM2G169726		Zm00001d027677	GRMZM2G329159	GRMZM2G043799
Zm00001d045295	GRMZM2G002614	183.455	43.8839	323.026	7.36091	2.14634e-08	2.92123e-06	Up	0.591838	0.657238	0.730716	6.8004	3.54109	3.29404		GO:0003824,GO:0008152,GO:0016874	catalytic activity|metabolic process|ligase activity											GRMZM2G468610		Zm00001d027678	GRMZM2G092483	GRMZM2G329159
Zm00001d034387	GRMZM2G141535	437.11	104.621	769.599	7.35606	2.9489e-05	0.00151904	Up	0.257184	0.972742	0.29039	2.02831	4.38359	3.8676		GO:0046872,GO:0016491,GO:0005506,GO:0009055,GO:0003824,GO:0050660,GO:0016614,GO:0051537,GO:0051536,GO:0055114	metal ion binding|oxidoreductase activity|iron ion binding|electron carrier activity|catalytic activity|flavin adenine dinucleotide binding|oxidoreductase activity, acting on CH-OH group of donors|2 iron, 2 sulfur cluster binding|iron-sulfur cluster binding|oxidation-reduction process											#N/A		Zm00001d027679	GRMZM2G092542	GRMZM2G092483
Zm00001d046226	GRMZM2G113203	1893.73	453.522	3333.94	7.35122	3.03161e-08	3.96138e-06	Up	0.976319	6.45537	1.07196	28.8339	18.6485	13.7335		GO:0016021,GO:0005524,GO:0006810,GO:0055085,GO:0042626,GO:0016887	integral component of membrane|ATP binding|transport|transmembrane transport|ATPase activity, coupled to transmembrane movement of substances|ATPase activity											GRMZM2G163709		na	GRMZM5G898447	GRMZM2G092542
Zm00001d017878	GRMZM2G459715	4.40366	1.05982	7.74751	7.31024	0.0367773	0.286318	Up	0.0116005	0	0.0108188	0.142547	0.0320016	0.0604986		GO:0005515	protein binding											GRMZM2G117497		Zm00001d027682	GRMZM2G139834	GRMZM5G898447
Zm00001d046926	GRMZM2G338376	4.26615	1.02761	7.50469	7.30302	0.0488635	0.338919	Up	0.0752015	0.0730886	0	0.404523	0.722729	0.292526		GO:0005524,GO:0004672,GO:0004674,GO:0006468	ATP binding|protein kinase activity|protein serine/threonine kinase activity|protein phosphorylation											GRMZM2G319781		Zm00001d027683	GRMZM2G358279	GRMZM2G139834
Zm00001d052767	GRMZM2G163709	117.939	28.4108	207.466	7.30237	3.90654e-05	0.00191438	Up	1.09139	0.846781	1.15274	12.6901	5.44537	5.73053		GO:0006629,GO:0016301,GO:0008081	lipid metabolic process|kinase activity|phosphoric diester hydrolase activity											GRMZM2G455321		Zm00001d027684	GRMZM2G056786	GRMZM2G358279
Zm00001d028815	GRMZM2G112524	51.1324	12.3518	89.913	7.27932	0.000141163	0.00547402	Up	0.768505	0.438941	1.43189	10.3354	4.74542	4.28306		GO:0003723,GO:0005622,GO:0009611,GO:0009651,GO:0050832,GO:0009733,GO:0009737,GO:0004540,GO:0009409,GO:0009617,GO:0009620,GO:0009646,GO:0009735,GO:0009739,GO:0009751,GO:0042542,GO:0046688	RNA binding|intracellular|response to wounding|response to salt stress|defense response to fungus|response to auxin|response to abscisic acid|ribonuclease activity|response to cold|response to bacterium|response to fungus|response to absence of light|response to cytokinin|response to gibberellin|response to salicylic acid|response to hydrogen peroxide|response to copper ion											GRMZM2G118345		Zm00001d027685	GRMZM2G056804	GRMZM2G056786
Zm00001d029696	GRMZM2G145069	183.5	44.6232	322.377	7.22444	3.3893e-05	0.0016977	Up	5.51836	1.08827	1.28236	19.9108	26.3634	11.5629		GO:0005515,GO:0004364	protein binding|glutathione transferase activity GST34											GRMZM2G075244		Zm00001d027687	AC198979.4_FG009	GRMZM2G056804
Zm00001d046132	GRMZM2G138370	35.3519	8.63224	62.0716	7.19067	5.47777e-05	0.00254934	Up	0.277691	0.271369	0.750709	8.04853	0.783529	2.88658														GRMZM2G063244		Zm00001d027688	GRMZM2G056870	AC198979.4_FG009
Zm00001d029708	GRMZM2G044383	167.073	41.0854	293.06	7.13294	0.000889735	0.0222154	Up	1.49514	2.43365	2.19546	25.1366	10.4706	9.29435		GO:0004364,GO:0005515	glutathione transferase activity|protein binding GST30											GRMZM5G806449		Zm00001d027691	GRMZM2G370985	GRMZM2G056870
Zm00001d019734	GRMZM2G123119	4.30462	1.05982	7.54942	7.12333	0.0429287	0.312631	Up	0.288825	0	0	0.888946	0.547175	0.675983		GO:0003677,GO:0006351,GO:0006355,GO:0005634,GO:0003700	DNA binding|transcription, DNA-templated|regulation of transcription, DNA-templated|nucleus|transcription factor activity, sequence-specific DNA binding											#N/A		Zm00001d027694	GRMZM2G112728	GRMZM2G370985
Zm00001d043918	#N/A	10.0862	2.48571	17.6867	7.11535	0.00146286	0.0313306	Up	0.117801	0.113643	0	0	0.108915	0.105274		GO:0006457,GO:0003755,GO:0000413	protein folding|peptidyl-prolyl cis-trans isomerase activity|protein peptidyl-prolyl isomerization											GRMZM5G833332		Zm00001d027695	GRMZM2G413315	GRMZM2G112728
Zm00001d032691	GRMZM2G085974	176.313	43.5774	309.049	7.09196	0.000341859	0.0108725	Up	1.18971	0.439813	2.01752	14.1316	5.16606	6.68919		GO:0005515	protein binding											GRMZM2G156877		Zm00001d027698	GRMZM2G413290	GRMZM2G413315
Zm00001d028708	#N/A	301.058	74.4793	527.636	7.08433	3.30638e-25	6.12011e-22	Up	0	0	0	33.391	0	0														GRMZM2G045090		Zm00001d027699	GRMZM2G112640	GRMZM2G413290
Zm00001d012220	GRMZM2G020957	5.66311	1.40112	9.9251	7.0837	0.0220314	0.206377	Up	0.0800827	0.0381627	0.0344986	0.281005	0.451764	0.149193		GO:0048268,GO:0005545,GO:0030136,GO:0005543,GO:0030276	clathrin coat assembly|1-phosphatidylinositol binding|clathrin-coated vesicle|phospholipid binding|clathrin binding											GRMZM2G143703		Zm00001d027700	GRMZM2G070087	GRMZM2G112640
Zm00001d051520	GRMZM5G833253	9.57644	2.39282	16.7601	7.00432	0.00275092	0.0491817	Up	0.0356824	0.172885	0.0318835	0.662784	0.771272	0.233959		GO:0003677	DNA binding											GRMZM2G107402		Zm00001d027701	GRMZM2G100707	GRMZM2G070087
Zm00001d012603	GRMZM2G440003	25.5215	6.38368	44.6593	6.99585	0.00380499	0.0624752	Up	0.614008	0.132396	0.241851	4.7365	1.47842	1.73712														#N/A		Zm00001d027702	GRMZM2G401342	GRMZM2G100707
Zm00001d048588	GRMZM2G018254	4.46449	1.12051	7.80847	6.96867	0.0358048	0.282402	Up	0.0917924	0	0	0.296552	0.115014	0.169892		GO:0006351,GO:0006355	transcription, DNA-templated|regulation of transcription, DNA-templated											GRMZM2G168898		Zm00001d027703	AC209858.4_FG004	GRMZM2G401342
Zm00001d053781	GRMZM2G010333	5.31297	1.34042	9.28552	6.92731	0.0282582	0.241784	Up	0.266645	0	0	0	0.253909	0														GRMZM5G865298		Zm00001d027705	AC209858.4_FG003	AC209858.4_FG004
Zm00001d050302	GRMZM2G138259	53.725	13.5635	93.8866	6.92203	0.0291896	0.24739	Up	0.295942	0.2846	1.14336	8.63463	2.73493	2.10086														GRMZM2G118809		Zm00001d027706	AC209858.4_FG002	AC209858.4_FG003
Zm00001d038791	GRMZM2G132212	206.532	52.1676	360.897	6.91803	0.00505197	0.0763571	Up	0.466019	0.323219	1.23731	8.77213	2.80857	3.09538		GO:0016021,GO:0005524,GO:0004672,GO:0004674,GO:0006468,GO:0005515	integral component of membrane|ATP binding|protein kinase activity|protein serine/threonine kinase activity|protein phosphorylation|protein binding											GRMZM2G456471		Zm00001d027707	GRMZM2G703490	AC209858.4_FG002
Zm00001d037935	GRMZM2G447480	11.1068	2.80595	19.4077	6.91663	0.00158213	0.0332032	Up	0.227578	0	0.148325	1.5048	0.643963	0.533042		GO:0005515	protein binding											GRMZM2G313162		na	GRMZM5G863105	GRMZM2G703490
Zm00001d043589	GRMZM2G079727	7.25675	1.83532	12.6782	6.9079	0.00765948	0.101462	Up	0.0802052	0.0190793	0	0.194999	0.112075	0.268625		GO:0003677,GO:0006351,GO:0006355,GO:0005634,GO:0003700	DNA binding|transcription, DNA-templated|regulation of transcription, DNA-templated|nucleus|transcription factor activity, sequence-specific DNA binding											GRMZM2G019171		Zm00001d027708	GRMZM2G086163	GRMZM5G863105
Zm00001d044272	GRMZM5G849600	47.5512	12.0545	83.0479	6.88939	9.35546e-05	0.00388854	Up	0.562993	0.348346	0.419316	5.08105	2.26288	2.21897														GRMZM2G181505		Zm00001d027709	GRMZM2G086072	GRMZM2G086163
Zm00001d030858	AF546187.1_FG012	14.5912	3.70104	25.4813	6.88492	0.00910171	0.114659	Up	0	0.141868	0	0	0.142692	0		GO:0046872,GO:0003676	metal ion binding|nucleic acid binding											GRMZM5G845736		Zm00001d027710	GRMZM2G122816	GRMZM2G086072
Zm00001d038930	GRMZM2G069325	17.1864	4.38735	29.9855	6.83453	5.72076e-05	0.00263283	Up	0.143951	0.41715	0.249305	2.56611	1.30749	1.45594		GO:0003677	DNA binding											GRMZM2G050450		Zm00001d027711	GRMZM2G122787	GRMZM2G122816
Zm00001d044157	#N/A	229.565	58.7269	400.402	6.81804	0.000569148	0.0159943	Up	2.27	1.01485	1.62198	18.5696	7.98259	7.01949		GO:0016021,GO:0020037,GO:0005506,GO:0016705,GO:0004497,GO:0055114	integral component of membrane|heme binding|iron ion binding|oxidoreductase activity, acting on paired donors, with incorporation or reduction of molecular oxygen|monooxygenase activity|oxidation-reduction process											GRMZM2G059985		Zm00001d027713	GRMZM2G315812	GRMZM2G122787
Zm00001d009619	GRMZM2G063880	33.3655	8.5864	58.1446	6.77171	0.00264127	0.0478688	Up	0.288768	0.0697377	0.6899	5.05389	1.73096	1.88197		GO:0006355,GO:0003700,GO:0043565	regulation of transcription, DNA-templated|transcription factor activity, sequence-specific DNA binding|sequence-specific DNA binding											GRMZM2G000035		Zm00001d027714	GRMZM2G018080	GRMZM2G315812
Zm00001d031769	GRMZM2G076723	15.9553	4.11788	27.7926	6.74926	0.000121625	0.00487291	Up	0.111157	0	0.0638049	0.594818	0.389764	0.887936		GO:0016491,GO:0055114,GO:0042128,GO:0030151,GO:0043546	oxidoreductase activity|oxidation-reduction process|nitrate assimilation|molybdenum ion binding|molybdopterin cofactor binding											GRMZM2G013170		Zm00001d027714	GRMZM2G315806	GRMZM2G018080
Zm00001d021726	GRMZM2G465999	53.7756	13.9109	93.6404	6.73146	0.0194126	0.191031	Up	0.258838	0.267793	0.130127	2.64469	0.418244	0.829377		GO:0005524,GO:0004672,GO:0004674,GO:0048544,GO:0006468	ATP binding|protein kinase activity|protein serine/threonine kinase activity|recognition of pollen|protein phosphorylation											GRMZM2G022642		Zm00001d027715	GRMZM2G445783	GRMZM2G315806
Zm00001d013629	GRMZM2G100412	181.749	47.1868	316.312	6.70339	0.0129961	0.145969	Up	0.781797	0.431886	2.04687	14.1168	3.65398	4.48732		GO:0020037,GO:0005506,GO:0016705,GO:0004497,GO:0055114	heme binding|iron ion binding|oxidoreductase activity, acting on paired donors, with incorporation or reduction of molecular oxygen|monooxygenase activity|oxidation-reduction process											GRMZM2G119755		Zm00001d027716	AC191040.2_FG002	GRMZM2G445783
Zm00001d005591	GRMZM2G100475	21.8652	5.67821	38.0521	6.70142	1.03936e-05	0.0006206	Up	0.203931	0.0787411	0.320589	1.5159	1.01043	1.32282		GO:0016021	integral component of membrane											GRMZM2G302604		Zm00001d027717	GRMZM2G173826	AC191040.2_FG002
Zm00001d029744	GRMZM2G099467	1580.12	411.933	2748.3	6.67173	4.28138e-05	0.00206735	Up	9.93039	5.33541	23.1347	138.075	60.443	65.4182		GO:0016491,GO:0055114,GO:0046872	oxidoreductase activity|oxidation-reduction process|metal ion binding											GRMZM2G111014		Zm00001d027718	GRMZM2G073373	GRMZM2G173826
Zm00001d027353	GRMZM2G126199	10.3905	2.71305	18.0679	6.65963	0.00224789	0.0428658	Up	0.0789271	0.075207	0.268164	0.846782	1.67011	1.14043														GRMZM5G840909		Zm00001d027719	GRMZM2G140339	GRMZM2G073373
Zm00001d003365	GRMZM2G022699	22.1898	5.79398	38.5856	6.65961	4.75079e-06	0.000314811	Up	1.101	0	0.264325	4.5304	3.10388	2.92768														GRMZM2G142836		Zm00001d027720	GRMZM2G141624	GRMZM2G140339
Zm00001d020984	GRMZM2G052266	366.397	95.7546	637.04	6.65284	9.80868e-13	3.24212e-10	Up	4.33056	3.42667	4.88029	38.8031	28.8289	22.0189		GO:0016491,GO:0055114	oxidoreductase activity|oxidation-reduction process											#N/A		Zm00001d027721	GRMZM2G141636	GRMZM2G141624
Zm00001d013879	GRMZM2G339562	26.5635	6.94489	46.1821	6.64979	7.61664e-05	0.00328379	Up	0	0	0	0.295144	1.26354	0.654945														GRMZM2G333022		Zm00001d027722	GRMZM2G027821	GRMZM2G141636
Zm00001d021688	GRMZM2G374309	162.286	42.5385	282.034	6.6301	0.00332841	0.0568426	Up	1.13548	0.259286	1.23717	10.5177	3.36858	3.89922		GO:0016021,GO:0005524,GO:0004672,GO:0006468	integral component of membrane|ATP binding|protein kinase activity|protein phosphorylation											GRMZM2G059134		Zm00001d027723	GRMZM5G813886	GRMZM2G027821
Zm00001d048637	GRMZM2G455321	867.568	227.556	1507.58	6.6251	9.34712e-06	0.000567883	Up	7.16056	0.244863	0.676148	12.6202	21.6279	20.726		GO:0043531	ADP binding											#N/A		Zm00001d027725	GRMZM2G000737	GRMZM5G813886
Zm00001d036984	GRMZM2G331283	10.3012	2.70192	17.9004	6.62509	0.00231817	0.0438149	Up	0	0.261717	0.0393931	0.402769	0.81288	0.473474		GO:0016021	integral component of membrane											GRMZM2G126975		Zm00001d027726	GRMZM2G000749	GRMZM2G000737
Zm00001d015397	AC207043.3_FG002	28.98	7.60834	50.3517	6.61796	7.42132e-07	6.35966e-05	Up	0	0	0.161065	1.20028	0.928567	1.28584														GRMZM2G015143		Zm00001d027727	GRMZM2G300801	GRMZM2G000749
Zm00001d012636	GRMZM2G434363	11.6357	3.05806	20.2133	6.60984	0.000978598	0.0238281	Up	0.0809564	0	0.0941129	0.544295	0.177281	0.201209		GO:0005524,GO:0004672,GO:0006468,GO:0004713	ATP binding|protein kinase activity|protein phosphorylation|protein tyrosine kinase activity											GRMZM2G480516		Zm00001d027731	GRMZM2G076062	GRMZM2G300801
Zm00001d046346	GRMZM2G340177	7.58857	1.99453	13.1826	6.60937	0.0142584	0.155226	Up	0.0571474	0.110191	0.149852	0.353288	0.487374	0.108347														GRMZM2G082149		Zm00001d027732	GRMZM2G377780	GRMZM2G076062
Zm00001d050455	GRMZM2G089698	178.557	47.1923	309.921	6.56719	0.00554639	0.081446	Up	2.55104	0.626654	4.97056	34.7008	11.1299	12.6936		GO:0016747	transferase activity, transferring acyl groups other than amino-acyl groups											GRMZM2G145972		Zm00001d027733	GRMZM2G377787	GRMZM2G377780
Zm00001d003283	GRMZM2G135387	78.165	20.7555	135.574	6.53196	0.00981045	0.121385	Up	0.220199	1.22677	0.66538	8.74227	2.27449	3.23322		GO:0016021,GO:0020037,GO:0005506,GO:0016705,GO:0004497,GO:0055114	integral component of membrane|heme binding|iron ion binding|oxidoreductase activity, acting on paired donors, with incorporation or reduction of molecular oxygen|monooxygenase activity|oxidation-reduction process											GRMZM2G374309		Zm00001d027734	GRMZM2G076423	GRMZM2G377787
Zm00001d044389	GRMZM2G041729	25.1291	6.68907	43.5692	6.5135	0.0458548	0.32611	Up	0.175128	0.201011	0.0656225	1.07844	1.81088	0.243709		GO:0005509	calcium ion binding											#N/A		Zm00001d027737	GRMZM2G397339	GRMZM2G076423
Zm00001d043220	AC233851.1_FG008	29.3352	7.83005	50.8404	6.49298	8.01567e-07	6.72371e-05	Up	0.642132	0	0.574144	3.53981	1.56995	1.61758														GRMZM5G842965		Zm00001d027739	GRMZM2G096252	GRMZM2G397339
Zm00001d053715	GRMZM2G304712	1673.92	446.878	2900.95	6.49161	6.85864e-07	5.95095e-05	Up	11.7579	15.7898	10.2846	62.7732	101.841	62.2278		GO:0008152,GO:0016758	metabolic process|transferase activity, transferring hexosyl groups											GRMZM2G540538		Zm00001d027740	GRMZM2G472236	GRMZM2G096252
Zm00001d024963	GRMZM2G330635	2343.48	628.382	4058.57	6.45877	6.86032e-06	0.000436874	Up	42.5401	70.1465	48.4177	276.211	483.061	290.12		GO:0016740,GO:0005515	transferase activity|protein binding											GRMZM2G177151		Zm00001d027741	GRMZM2G169747	GRMZM2G472236
Zm00001d015857	#N/A	112.453	30.5059	194.4	6.37253	0.000147291	0.00564862	Up	1.28426	0	0.0335095	1.77037	2.78993	3.07199		GO:0003735,GO:0006412,GO:0005840,GO:0005622	structural constituent of ribosome|translation|ribosome|intracellular											GRMZM2G112524		Zm00001d027742	GRMZM2G472266	GRMZM2G169747
Zm00001d048444	GRMZM2G075563	11.5961	3.17574	20.0165	6.30293	0.00109629	0.025634	Up	0.254444	0.0978672	0.0893325	1.12336	0.86513	0.381801		GO:0005515	protein binding											GRMZM2G455909		Zm00001d027743	GRMZM2G038982	GRMZM2G472266
Zm00001d021638	GRMZM2G180080	25.8714	7.14374	44.599	6.24309	0.00964649	0.11973	Up	0.462797	0.0498201	0.44893	3.7774	1.32307	1.17361		GO:0005524	ATP binding											GRMZM2G423202		Zm00001d027745	GRMZM2G453148	GRMZM2G038982
Zm00001d028651	GRMZM2G043878	32.5306	8.99079	56.0705	6.23644	0.00225189	0.0429126	Up	1.03444	0.589136	0.0758121	6.06367	1.56975	5.72992														GRMZM2G106558		Zm00001d027746	GRMZM2G453139	GRMZM2G453148
Zm00001d041079	#N/A	33.0713	9.16868	56.9738	6.21396	0.000621949	0.0170493	Up	0	0.788692	2.27018	6.87761	3.1299	4.64994														#N/A		Zm00001d027748	GRMZM2G453111	GRMZM2G453139
Zm00001d019698	GRMZM2G061702	1086.36	302.583	1870.14	6.1806	4.24917e-15	1.90287e-12	Up	4.92774	8.20188	5.62081	43.1851	47.8856	31.139		GO:0004061,GO:0019441	arylformamidase activity|tryptophan catabolic process to kynurenine											GRMZM2G420988		Zm00001d027749	GRMZM2G154211	GRMZM2G453111
Zm00001d028165	GRMZM2G119150	21.5589	6.01018	37.1075	6.17412	0.00277279	0.0494454	Up	0.50425	0.13999	0.187508	2.36333	0.203463	1.64294		GO:0003824,GO:0010150,GO:0009058,GO:0042742,GO:0030170,GO:0009089,GO:0010285,GO:0009862,GO:0008483	catalytic activity|leaf senescence|biosynthetic process|defense response to bacterium|pyridoxal phosphate binding|lysine biosynthetic process via diaminopimelate|L,L-diaminopimelate aminotransferase activity|systemic acquired resistance, salicylic acid mediated signaling pathway|transaminase activity											GRMZM2G176472		Zm00001d027751	GRMZM2G154119	GRMZM2G154211
Zm00001d012543	AC203294.3_FG008	24.1972	6.74976	41.6447	6.1698	6.63603e-06	0.000424538	Up	1.30357	1.31045	0	4.66761	6.75754	13.2819														GRMZM2G017164		Zm00001d027752	GRMZM2G154087	GRMZM2G154119
Zm00001d030172	GRMZM2G179528	1305.63	364.758	2246.49	6.15886	1.63516e-08	2.29294e-06	Up	0.896526	3.77877	1.04528	16.0465	9.53628	8.35345		GO:0006508,GO:0004185	proteolysis|serine-type carboxypeptidase activity											GRMZM2G115422		Zm00001d027752	GRMZM2G453001	GRMZM2G154087
Zm00001d044086	GRMZM2G098305	41.8428	11.7038	71.9817	6.15026	0.0495078	0.342191	Up	1.12995	0.416639	0.332099	8.8666	1.74471	2.14984		GO:0006260,GO:0003697	DNA replication|single-stranded DNA binding											GRMZM2G043348		na	GRMZM2G703497	GRMZM2G453001
Zm00001d008795	GRMZM2G095280	10.7154	2.99737	18.4333	6.14984	0.0409588	0.306	Up	0.0923799	0	0.166745	1.05572	0.316607	0.249708		GO:0008152,GO:0016758	metabolic process|transferase activity, transferring hexosyl groups											GRMZM2G057611		Zm00001d027753	GRMZM2G452996	GRMZM2G703497
Zm00001d008449	GRMZM2G000035	104.192	29.1517	179.233	6.14829	8.54421e-07	7.1027e-05	Up	1.52402	0.909158	2.32216	11.0505	7.58513	5.22204		GO:0016021	integral component of membrane											GRMZM2G379563		Zm00001d027755	GRMZM2G154036	GRMZM2G452996
Zm00001d036197	GRMZM2G362298	14.8041	4.14266	25.4655	6.14714	0.000286304	0.0094973	Up	0.159531	0.0762127	0.201676	1.40555	0.683995	0.609513		GO:0016747	transferase activity, transferring acyl groups other than amino-acyl groups											GRMZM2G057852		Zm00001d027756	GRMZM2G165998	GRMZM2G154036
Zm00001d011419	GRMZM2G021436	5.21366	1.46181	8.96551	6.13315	0.0327927	0.268344	Up	0.0464813	0.0225324	0	0.206865	0.131833	0.021529		GO:0020037,GO:0005506,GO:0016705,GO:0055114,GO:0004497,GO:0016021	heme binding|iron ion binding|oxidoreductase activity, acting on paired donors, with incorporation or reduction of molecular oxygen|oxidation-reduction process|monooxygenase activity|integral component of membrane											GRMZM2G087625		Zm00001d027757	GRMZM2G165972	GRMZM2G165998
Zm00001d029468	GRMZM2G142390	5.86533	1.65323	10.0774	6.09559	0.0342226	0.27486	Up	0.0406856	0.0392925	0.105592	0.646018	0.463431	0.0776968		GO:0005524,GO:0004672,GO:0006468	ATP binding|protein kinase activity|protein phosphorylation											GRMZM2G142661		na	GRMZM5G880418	GRMZM2G165972
Zm00001d019207	GRMZM2G079632	589.132	166.744	1011.52	6.06632	5.47278e-08	6.49613e-06	Up	5.28438	8.14204	6.00364	31.0395	49.6317	37.1734		GO:0003677,GO:0006351,GO:0006355,GO:0005634	DNA binding|transcription, DNA-templated|regulation of transcription, DNA-templated|nucleus											GRMZM2G156632		Zm00001d027759	GRMZM2G480386	GRMZM5G880418
Zm00001d023625	GRMZM2G102662	5.94968	1.68544	10.2139	6.06011	0.0336549	0.272032	Up	0	0	0.045893	0.474357	0.303232	0.150852		GO:0020037,GO:0005506,GO:0016705,GO:0004497,GO:0055114	heme binding|iron ion binding|oxidoreductase activity, acting on paired donors, with incorporation or reduction of molecular oxygen|monooxygenase activity|oxidation-reduction process											GRMZM2G037472		Zm00001d027760	GRMZM2G056231	GRMZM2G480386
Zm00001d048639	GRMZM2G013170	1028.84	291.569	1766.1	6.05723	0.000145915	0.00562686	Up	8.54173	0.20401	0.473754	10.9495	21.0469	20.994		GO:0043531	ADP binding											GRMZM2G087326		na	GRMZM5G837981	GRMZM2G056231
Zm00001d021487	GRMZM2G413030	14.7486	4.1842	25.313	6.04966	0.000508826	0.01464	Up	0.0206843	0.0197544	0.18568	0.616733	0.325785	0.371447		GO:0005524,GO:0004672,GO:0004674,GO:0048544,GO:0006468	ATP binding|protein kinase activity|protein serine/threonine kinase activity|recognition of pollen|protein phosphorylation											GRMZM2G077375		Zm00001d027763	GRMZM2G136081	GRMZM5G837981
Zm00001d008633	GRMZM2G421669	59.0644	16.7714	101.357	6.04347	0.00100295	0.0241098	Up	0.192623	0.169875	0.321207	2.33794	0.83743	1.04032		GO:0016021,GO:0005524,GO:0004672,GO:0004674,GO:0006468,GO:0005515	integral component of membrane|ATP binding|protein kinase activity|protein serine/threonine kinase activity|protein phosphorylation|protein binding											GRMZM2G324903		na	GRMZM2G136088	GRMZM2G136081
Zm00001d002847	GRMZM2G354909	258.976	73.5976	444.355	6.03763	0.00502992	0.0761879	Up	1.69913	3.34022	3.41923	31.242	9.98574	11.3386														GRMZM2G078779		Zm00001d027766	GRMZM2G031790	GRMZM2G136088
Zm00001d052137	GRMZM2G126765	44.7069	12.7445	76.6693	6.01588	0.017789	0.179474	Up	0.802536	0.541157	0.982311	9.65442	2.50568	3.03403		GO:0004725,GO:0016791,GO:0016311	protein tyrosine phosphatase activity|phosphatase activity|dephosphorylation											GRMZM2G172204		Zm00001d027767	GRMZM2G031718	GRMZM2G031790
Zm00001d013482	#N/A	5.58364	1.59254	9.57474	6.01225	0.0376079	0.290132	Up	0	0	0.521488	0.51395	0.557835	0.421415														GRMZM2G100650		na	GRMZM2G172448	GRMZM2G031718
Zm00001d006117	GRMZM2G158721	25.1715	7.19138	43.1517	6.00047	0.00466367	0.0725416	Up	0.0609101	0	0.00797321	0.388972	0.143808	0.166189		GO:0005524,GO:0005509,GO:0004672,GO:0006468,GO:0005515	ATP binding|calcium ion binding|protein kinase activity|protein phosphorylation|protein binding											GRMZM2G125151		Zm00001d027768	GRMZM2G172410	GRMZM2G172448
Zm00001d033495	GRMZM5G849971	4.68087	1.34042	8.02132	5.98417	0.0499757	0.344087	Up	0	0.0217424	0.0208424	0.296286	0.0626382	0.101108		GO:0008270,GO:0005515	zinc ion binding|protein binding											GRMZM2G126765		Zm00001d027769	GRMZM2G172322	GRMZM2G172410
Zm00001d002707	GRMZM2G120016	72.8134	20.8571	124.77	5.98213	0.01887	0.186849	Up	1.00925	0.77879	1.50563	13.5422	3.8029	4.13664		GO:0008152,GO:0016758	metabolic process|transferase activity, transferring hexosyl groups											GRMZM2G011888		Zm00001d027770	AC195260.2_FG007	GRMZM2G172322
Zm00001d009295	GRMZM2G477457	6.07841	1.74613	10.4107	5.96215	0.038688	0.294778	Up	0.0962669	0	0.0279297	0.0572919	0.24233	0.450738		GO:0016020,GO:0015079,GO:0071805	membrane|potassium ion transmembrane transporter activity|potassium ion transmembrane transport											GRMZM2G135132		Zm00001d027773	AC186417.3_FG004	AC195260.2_FG007
Zm00001d007712	GRMZM2G372180	9.32354	2.68085	15.9662	5.95567	0.00595096	0.0857438	Up	0.0135716	0.00638579	0.0189561	0.0710397	0.0617098	0.0574316		GO:0005524,GO:0003777,GO:0007018,GO:0005515,GO:0008017	ATP binding|microtubule motor activity|microtubule-based movement|protein binding|microtubule binding											GRMZM2G179792		Zm00001d027773	AC186417.3_FG006	AC186417.3_FG004
Zm00001d023843	GRMZM2G176472	200.248	57.5949	342.9	5.95366	0.00437523	0.0692484	Up	0.8541	0.17398	1.82619	10.1125	3.02065	4.2698		GO:0006950,GO:0005516	response to stress|calmodulin binding											AC194056.3_FG008		Zm00001d027775	GRMZM2G181497	AC186417.3_FG006
Zm00001d027423	GRMZM2G475380	19.4913	5.61752	33.3651	5.93948	0.0474948	0.332919	Up	0.237137	0.0571802	0.358856	3.02678	0.626439	0.857481		GO:0046872,GO:0016491,GO:0055114	metal ion binding|oxidoreductase activity|oxidation-reduction process											#N/A		Zm00001d027790	GRMZM2G377311	GRMZM2G181497
Zm00001d017974	GRMZM2G376103	13.6204	3.9358	23.305	5.92128	0.00366232	0.0607024	Up	0	0	0	16.1227	2.80574	0														GRMZM2G030814		na	AC187207.3_FG006	GRMZM2G377311
Zm00001d038115	GRMZM2G332107	31.5529	9.13085	53.9749	5.91127	1.02054e-06	8.25466e-05	Up	0.174902	0.196428	0.307951	1.13789	1.26643	1.03706		GO:0005524,GO:0004672,GO:0006468	ATP binding|protein kinase activity|protein phosphorylation											GRMZM5G825515		Zm00001d027791	GRMZM2G061812	AC187207.3_FG006
Zm00001d003301	GRMZM2G139811	20.4312	5.91357	34.9489	5.90994	3.93077e-05	0.00192144	Up	0.120337	0.0656461	0.047123	0.585922	0.526131	0.367428		GO:0016021,GO:0005515	integral component of membrane|protein binding											GRMZM2G101117		Zm00001d027792	AC210834.4_FG005	GRMZM2G061812
Zm00001d008923	GRMZM2G354460	15.3197	4.45918	26.1802	5.87108	0.0212103	0.201749	Up	0.99014	0.157961	0.716464	7.31661	1.69878	2.31535		GO:0016021	integral component of membrane											GRMZM2G051689		Zm00001d027793	AC210834.4_FG006	AC210834.4_FG005
Zm00001d011428	GRMZM2G000739	93.6764	27.2835	160.069	5.8669	3.2358e-13	1.12302e-10	Up	0.0378825	0.10874	0.103219	0.402402	0.248382	0.239935		GO:0008168,GO:0006779,GO:0055114,GO:0008152	methyltransferase activity|porphyrin-containing compound biosynthetic process|oxidation-reduction process|metabolic process											GRMZM2G334658		Zm00001d027794	GRMZM2G103292	AC210834.4_FG006
Zm00001d008976	GRMZM2G010596	41.3016	12.0849	70.5184	5.83526	1.2667e-05	0.000734138	Up	0.261589	0.345371	0.477447	3.12155	1.48104	1.98559		GO:0003824,GO:0015940,GO:0003864,GO:0008168	catalytic activity|pantothenate biosynthetic process|3-methyl-2-oxobutanoate hydroxymethyltransferase activity|methyltransferase activity											GRMZM2G156712		Zm00001d027795	AC210834.4_FG011	GRMZM2G103292
Zm00001d007827	GRMZM2G355752	3888.41	1138.94	6637.89	5.82816	0.000224361	0.00786539	Up	33.3243	22.2668	69.1523	193.718	129.003	112.311		GO:0016021	integral component of membrane											GRMZM2G092284		Zm00001d027796	AC210834.4_FG012	AC210834.4_FG011
Zm00001d048558	GRMZM2G161905	10.1961	2.99366	17.3986	5.81183	0.00388568	0.0635236	Up	0.242543	0.233003	0.422653	1.70108	0.681189	0.784516		GO:0005515	protein binding											GRMZM2G022402		Zm00001d027797	AC210834.4_FG013	AC210834.4_FG012
Zm00001d047201	GRMZM2G035517	80.4751	23.6388	137.311	5.80872	0.000885441	0.022148	Up	0.439047	0.30829	0.412715	3.61468	1.51779	1.56121		GO:0006508,GO:0004185	proteolysis|serine-type carboxypeptidase activity											GRMZM2G127911		Zm00001d027798	AC210834.4_FG009	AC210834.4_FG013
Zm00001d042135	GRMZM2G030814	122.423	35.9782	208.868	5.8054	4.88952e-08	5.87694e-06	Up	1.34262	1.10796	0.723655	9.47258	4.63121	4.58703		GO:0016020,GO:0003333,GO:0015171	membrane|amino acid transmembrane transport|amino acid transmembrane transporter activity											GRMZM2G126812		Zm00001d027799	GRMZM2G169320	AC210834.4_FG009
Zm00001d003524	GRMZM2G126062	174.291	51.2327	297.349	5.80389	0.00101945	0.0242628	Up	1.77261	2.3361	2.20688	22.042	8.52354	8.76754		GO:0016491,GO:0055114	oxidoreductase activity|oxidation-reduction process											GRMZM2G062974		na	GRMZM2G169295	GRMZM2G169320
Zm00001d051917	GRMZM2G157522	812.773	239.883	1385.66	5.77642	0.00155711	0.032827	Up	0.700544	4.33293	0.842902	5.90601	15.9336	11.7703														GRMZM2G097015		Zm00001d027800	GRMZM2G169280	GRMZM2G169295
Zm00001d044106	GRMZM5G888620	1221.05	363.571	2078.53	5.71699	2.16352e-26	4.29072e-23	Up	10.719	28.7586	11.3787	105.951	94.9563	103.652		GO:0016021,GO:0008152,GO:0016758	integral component of membrane|metabolic process|transferase activity, transferring hexosyl groups											GRMZM2G006964		Zm00001d027801	GRMZM2G470438	GRMZM2G169280
Zm00001d032946	GRMZM2G057093	5.95555	1.77462	10.1365	5.71191	0.0266549	0.233216	Up	0.1632	0.0782033	0.0716036	0.652583	0.30387	0.744296		GO:0004553,GO:0005975	hydrolase activity, hydrolyzing O-glycosyl compounds|carbohydrate metabolic process											GRMZM2G310947		Zm00001d027802	GRMZM2G004641	GRMZM2G470438
Zm00001d030759	GRMZM2G093736	83.8861	25.0549	142.717	5.69618	6.54544e-12	1.86815e-09	Up	0.574909	0.920271	1.09602	5.79443	4.40718	3.66232		GO:0016021,GO:0005886,GO:0005524,GO:0004672,GO:0030246,GO:0006468,GO:0042742,GO:0002229	integral component of membrane|plasma membrane|ATP binding|protein kinase activity|carbohydrate binding|protein phosphorylation|defense response to bacterium|defense response to oomycetes											GRMZM2G098305		Zm00001d027803	GRMZM2G417455	GRMZM2G004641
Zm00001d029397	GRMZM2G179792	176.978	52.8784	301.077	5.69376	0.00545965	0.0805404	Up	0.974587	0.864361	0.814975	9.53699	3.17348	3.45699		GO:0016020,GO:0070290,GO:0016042,GO:0046470,GO:0004630,GO:0005509,GO:0003824,GO:0005515	membrane|N-acylphosphatidylethanolamine-specific phospholipase D activity|lipid catabolic process|phosphatidylcholine metabolic process|phospholipase D activity|calcium ion binding|catalytic activity|protein binding											GRMZM2G025366		Zm00001d027805	GRMZM2G407396	GRMZM2G417455
Zm00001d043912	#N/A	297.389	89.2582	505.519	5.66356	7.19961e-10	1.35985e-07	Up	2.08861	3.3172	1.76802	10.7863	16.6175	12.8134		GO:0006950	response to stress											GRMZM2G132212		Zm00001d027807	GRMZM2G314133	GRMZM2G407396
Zm00001d052989	GRMZM2G130389	52.5966	15.8156	89.3776	5.65123	0.000182109	0.00670592	Up	0.280268	0.0442211	0.609247	2.53742	0.642646	1.20519		GO:0005524,GO:0004672,GO:0006468	ATP binding|protein kinase activity|protein phosphorylation											GRMZM2G350793		Zm00001d027808	GRMZM2G037912	GRMZM2G314133
Zm00001d013822	#N/A	14.9789	4.50874	25.449	5.64437	0.000474685	0.0139467	Up	0.0174089	0.0663021	0	0.302289	0.126795	0.240658		GO:0043531	ADP binding											GRMZM2G135387		na	GRMZM2G027626	GRMZM2G037912
Zm00001d029771	#N/A	5.38625	1.62474	9.14776	5.63029	0.0497595	0.343419	Up	0.0466421	0	0	0.0406438	0.127994	0.0412996		GO:0003723	RNA binding											GRMZM2G062396		na	GRMZM2G327695	GRMZM2G027626
Zm00001d011438	GRMZM2G013726	15.6332	4.73607	26.5304	5.60177	0.0179915	0.180794	Up	0.178157	0.171358	0.312499	2.04383	0.502284	0.835276		GO:0003824,GO:0050662	catalytic activity|coenzyme binding											GRMZM2G039757		Zm00001d027809	GRMZM2G123986	GRMZM2G327695
Zm00001d023611	GRMZM2G002542	36.152	10.9792	61.3249	5.58554	0.00322142	0.0553482	Up	0.0355806	0.13677	0.284869	1.60928	0.536202	0.75984		GO:0005524,GO:0004672,GO:0006468,GO:0005515	ATP binding|protein kinase activity|protein phosphorylation|protein binding											GRMZM2G091837		na	GRMZM2G556515	GRMZM2G123986
Zm00001d052139	GRMZM2G428027	7.97813	2.42502	13.5312	5.57985	0.0132583	0.147719	Up	0.075781	0.0364276	0.0326025	0.236061	0.325357	0.397324		GO:0016491,GO:0055114,GO:0042128,GO:0030151,GO:0043546	oxidoreductase activity|oxidation-reduction process|nitrate assimilation|molybdenum ion binding|molybdopterin cofactor binding											GRMZM2G138259		Zm00001d027810	GRMZM2G124042	GRMZM2G556515
Zm00001d011607	GRMZM2G375696	5.50609	1.68172	9.33045	5.54814	0.0429565	0.312631	Up	0.184079	0.176333	0.313984	0.480408	0	0.171446														#N/A		Zm00001d027811	GRMZM2G124051	GRMZM2G124042
Zm00001d043650	GRMZM2G054115	2379.51	727.203	4031.82	5.54429	2.1428e-08	2.92123e-06	Up	14.9678	41.3485	9.80006	102.655	151.502	117.791		GO:0016021,GO:0003824,GO:0016846	integral component of membrane|catalytic activity|carbon-sulfur lyase activity											GRMZM5G863146		Zm00001d027812	GRMZM5G850455	GRMZM2G124051
Zm00001d004972	#N/A	12.6989	3.89054	21.5073	5.52809	0.00246535	0.0457556	Up	0.623744	0.391534	0.175507	0.892857	0.578214	0.948731		GO:0005509	calcium ion binding											GRMZM2G151967		Zm00001d027815	GRMZM2G424020	GRMZM5G850455
Zm00001d026116	AC209206.3_FG004	5.89613	1.80682	9.98543	5.52651	0.0338075	0.273026	Up	0	0	0.135561	0.694889	1.04602	0.75386														GRMZM2G029385		Zm00001d027816	GRMZM2G115131	GRMZM2G424020
Zm00001d031131	#N/A	6.57495	2.02303	11.1269	5.50012	0.0277205	0.238774	Up	0	0.212524	0	0.497601	0.430047	0.436197		GO:0016021,GO:0055085	integral component of membrane|transmembrane transport											GRMZM2G152328		Zm00001d027819	GRMZM2G315601	GRMZM2G115131
Zm00001d042869	GRMZM2G479423	5901.92	1816.39	9987.45	5.49853	2.59484e-17	1.71538e-14	Up	9.51107	8.64889	8.2086	51.0512	55.0184	35.8364		GO:0016491,GO:0055114	oxidoreductase activity|oxidation-reduction process											GRMZM2G010468		Zm00001d027820	GRMZM2G046086	GRMZM2G315601
Zm00001d036715	GRMZM2G170281	106.869	32.8986	180.84	5.49687	0.00590135	0.0851174	Up	0.404991	0.623288	0.740036	5.66345	1.54432	2.50941		GO:0016021	integral component of membrane											GRMZM2G116629		Zm00001d027821	GRMZM2G140302	GRMZM2G046086
Zm00001d016083	GRMZM2G107380	170.28	52.4455	288.114	5.49358	0.00669025	0.0925073	Up	5.50229	6.33443	6.57213	14.4351	31.7495	17.6748														GRMZM2G391312		Zm00001d027824	GRMZM2G417835	GRMZM2G140302
Zm00001d006534	GRMZM2G087662	93.7794	28.9262	158.633	5.48405	0.000870065	0.0219106	Up	1.98188	0.970772	1.90741	14.3276	5.22613	6.96629		GO:0016021	integral component of membrane											GRMZM2G350626		Zm00001d027826	GRMZM2G112793	GRMZM2G417835
Zm00001d053702	GRMZM2G040094	6.65993	2.05523	11.2646	5.48097	0.0242672	0.219258	Up	0	0.0181243	0.0178737	0.0926356	0.114188	0.0409253		GO:0005509	calcium ion binding											#N/A		Zm00001d027827	GRMZM2G412674	GRMZM2G112793
Zm00001d052209	GRMZM2G041699	42.8831	13.2538	72.5125	5.47109	0.00380104	0.0624472	Up	0	1.48924	0.0764574	4.88808	1.62577	2.65018		GO:0008152,GO:0016758	metabolic process|transferase activity, transferring hexosyl groups											GRMZM2G146395		Zm00001d027832	GRMZM2G063287	GRMZM2G412674
Zm00001d028999	GRMZM2G011598	27.5518	8.54114	46.5625	5.45155	0.0229191	0.211341	Up	0.478538	0.230151	0.483236	3.41723	1.06783	1.07253		GO:0003677,GO:0006351,GO:0006355,GO:0005634	DNA binding|transcription, DNA-templated|regulation of transcription, DNA-templated|nucleus											GRMZM2G071292		Zm00001d027833	GRMZM2G362960	GRMZM2G063287
Zm00001d043752	GRMZM2G051683	55.2891	17.1888	93.3893	5.43314	0.000389348	0.0120114	Up	1.08101	0.966588	0.798492	6.5449	7.5247	2.73988		GO:0008152,GO:0016758	metabolic process|transferase activity, transferring hexosyl groups											GRMZM2G075974		Zm00001d027835	GRMZM2G362942	GRMZM2G362960
Zm00001d045145	GRMZM2G000423	935.93	291.156	1580.7	5.42906	7.10113e-25	1.15978e-21	Up	9.96633	7.23619	4.78674	40.1681	38.845	43.2771		GO:0046872,GO:0016491,GO:0055114,GO:0051213	metal ion binding|oxidoreductase activity|oxidation-reduction process|dioxygenase activity											GRMZM2G126749		na	GRMZM2G389769	GRMZM2G362942
Zm00001d025533	GRMZM2G132875	361.165	112.424	609.906	5.42507	1.05423e-10	2.39923e-08	Up	5.02248	3.08088	4.90442	29.7379	24.7919	16.3838		GO:0016491,GO:0055114	oxidoreductase activity|oxidation-reduction process											GRMZM2G020772		Zm00001d027837	GRMZM2G091822	GRMZM2G389769
Zm00001d047523	GRMZM2G381378	17.2096	5.36169	29.0575	5.41947	0.000297202	0.00976738	Up	0.13802	0.0669595	0.242174	1.97487	1.0595	0.929739		GO:0006355,GO:0003700,GO:0043565	regulation of transcription, DNA-templated|transcription factor activity, sequence-specific DNA binding|sequence-specific DNA binding											GRMZM2G423863		Zm00001d027838	GRMZM2G091916	GRMZM2G091822
Zm00001d028231	GRMZM5G879116	6.56817	2.05523	11.0811	5.39167	0.0250157	0.224537	Up	0.132904	0.127646	0.11387	0.945465	0.566404	0.56683														GRMZM2G143460		Zm00001d027839	GRMZM2G091921	GRMZM2G091916
Zm00001d009404	GRMZM2G084727	212.622	66.7518	358.492	5.37052	3.15561e-17	2.03757e-14	Up	1.12076	3.03754	2.59861	13.9259	10.5173	10.1597		GO:0009507,GO:0008152,GO:0006807,GO:0036361,GO:0016855	chloroplast|metabolic process|nitrogen compound metabolic process|racemase activity, acting on amino acids and derivatives|racemase and epimerase activity, acting on amino acids and derivatives											GRMZM2G009045		Zm00001d027841	GRMZM2G026807	GRMZM2G091921
Zm00001d017380	GRMZM2G170016	59.2493	18.6165	99.8822	5.36524	0.0282096	0.241591	Up	0.664251	0.255205	0.246902	4.57474	1.14134	1.30736		GO:0016021	integral component of membrane											GRMZM2G138370		Zm00001d027842	GRMZM2G136113	GRMZM2G026807
Zm00001d009103	GRMZM2G053503	8.40954	2.64864	14.1704	5.35007	0.0131855	0.147381	Up	0.0818502	0.238851	0.218502	1.16013	0.85159	1.3148		GO:0003677,GO:0006351,GO:0006355,GO:0005634,GO:0003700	DNA binding|transcription, DNA-templated|regulation of transcription, DNA-templated|nucleus|transcription factor activity, sequence-specific DNA binding											GRMZM2G154628		Zm00001d027843	GRMZM2G464818	GRMZM2G136113
Zm00001d011576	GRMZM2G369485	108.24	34.2761	182.203	5.31575	2.76731e-12	8.44334e-10	Up	1.27426	4.58428	1.89833	15.0011	14.7715	9.53663														GRMZM2G127853		Zm00001d027844	GRMZM5G857303	GRMZM2G464818
Zm00001d028814	GRMZM2G112538	81.499	25.8223	137.176	5.3123	0.0177062	0.178898	Up	2.3518	0.596508	2.63484	18.8276	6.05619	5.41385		GO:0003723,GO:0005622,GO:0009611,GO:0009651,GO:0050832,GO:0009733,GO:0009737,GO:0004540,GO:0009409,GO:0009617,GO:0009620,GO:0009646,GO:0009735,GO:0009739,GO:0009751,GO:0042542,GO:0046688,GO:0006952,GO:0009607	RNA binding|intracellular|response to wounding|response to salt stress|defense response to fungus|response to auxin|response to abscisic acid|ribonuclease activity|response to cold|response to bacterium|response to fungus|response to absence of light|response to cytokinin|response to gibberellin|response to salicylic acid|response to hydrogen peroxide|response to copper ion|defense response|respo…											GRMZM2G045976		Zm00001d027845	GRMZM2G162725	GRMZM5G857303
Zm00001d014063	GRMZM2G112309	68.9866	21.8636	116.11	5.31063	0.00847777	0.109213	Up	0.224364	0.107779	0.401331	2.36969	0.814959	0.760818		GO:0005524,GO:0004672,GO:0006468,GO:0005515	ATP binding|protein kinase activity|protein phosphorylation|protein binding											GRMZM2G061403		na	GRMZM2G384250	GRMZM2G162725
Zm00001d048950	GRMZM2G117942	196.446	62.3774	330.514	5.29862	0.00276291	0.0493326	Up	4.56497	3.29528	9.07803	53.8643	19.6315	22.254		GO:0042742,GO:0050832	defense response to bacterium|defense response to fungus											GRMZM2G177991		Zm00001d027846	GRMZM2G162749	GRMZM2G384250
Zm00001d029573	GRMZM5G852170	38.827	12.3388	65.3152	5.29349	3.91947e-07	3.68502e-05	Up	0.188977	0.103449	0.170071	0.862217	0.85035	0.705941		GO:0003676,GO:0005737,GO:0010267,GO:0060145,GO:0010599,GO:0010050,GO:0040034,GO:0005515,GO:0051607	nucleic acid binding|cytoplasm|production of ta-siRNAs involved in RNA interference|viral gene silencing in virus induced gene silencing|production of lsiRNA involved in RNA interference|vegetative phase change|regulation of development, heterochronic|protein binding|defense response to virus											GRMZM2G074248		Zm00001d027847	GRMZM2G162764	GRMZM2G162749
Zm00001d027649	GRMZM2G062724	30.0357	9.552	50.5195	5.28889	0.00879623	0.111877	Up	0.0582332	0.0835086	0.0263499	0.983247	0.330978	0.375579		GO:0008270,GO:0005515	zinc ion binding|protein binding											GRMZM2G140231		Zm00001d027848	GRMZM2G162776	GRMZM2G162764
Zm00001d027946	GRMZM2G061806	32.0088	10.1808	53.8368	5.28805	0.0217428	0.204941	Up	0	0.266922	1.0435	4.29074	1.17877	1.78562		GO:0016747	transferase activity, transferring acyl groups other than amino-acyl groups											GRMZM2G001850		Zm00001d027850	GRMZM2G162800	GRMZM2G162776
Zm00001d020172	GRMZM2G011526	9.694	3.08655	16.3014	5.28144	0.00676531	0.0933129	Up	0.0573552	0.0182266	0.0719337	0.33582	0.211016	0.28266		GO:0005524,GO:0004672,GO:0006468	ATP binding|protein kinase activity|protein phosphorylation											GRMZM2G147268		Zm00001d027851	GRMZM2G162814	GRMZM2G162800
Zm00001d040094	GRMZM2G426917	41.7849	13.3379	70.232	5.26559	0.00218575	0.0420272	Up	0.123523	0.0620721	0.0989057	0.924602	0.385108	0.319437		GO:0016021,GO:0005524,GO:0004672,GO:0030247,GO:0006468	integral component of membrane|ATP binding|protein kinase activity|polysaccharide binding|protein phosphorylation											GRMZM2G347174		Zm00001d027852	GRMZM2G139963	GRMZM2G162814
Zm00001d009112	GRMZM5G842965	71.2397	22.8386	119.641	5.23855	1.57064e-08	2.22494e-06	Up	1.71769	1.53168	1.02263	10.4265	4.91799	4.93631														GRMZM2G117878		Zm00001d027853	GRMZM2G034283	GRMZM2G139963
Zm00001d047973	GRMZM2G046894	79.8775	25.6571	134.098	5.22655	1.99633e-10	4.23115e-08	Up	0.101357	0.148655	0.442815	1.24694	1.10163	0.956509		GO:0006457,GO:0003755,GO:0000413	protein folding|peptidyl-prolyl cis-trans isomerase activity|protein peptidyl-prolyl isomerization											GRMZM2G073034		Zm00001d027854	GRMZM2G034302	GRMZM2G034283
Zm00001d022277	GRMZM2G039757	277.663	89.4272	465.899	5.20982	0.00191928	0.0383648	Up	4.50227	1.63949	4.20142	8.68537	21.8018	24.2813		GO:0005515	protein binding											GRMZM2G140817		Zm00001d027855	GRMZM2G035156	GRMZM2G034302
Zm00001d031377	GRMZM2G129058	73.75	23.7639	123.736	5.20688	1.392e-10	3.09191e-08	Up	0.368478	0.248253	0.360317	2.52452	1.73766	1.24005		GO:0016021,GO:0005524,GO:0004672,GO:0004674,GO:0048544,GO:0006468	integral component of membrane|ATP binding|protein kinase activity|protein serine/threonine kinase activity|recognition of pollen|protein phosphorylation											GRMZM2G143165		Zm00001d027856	GRMZM2G035243	GRMZM2G035156
Zm00001d014664	GRMZM2G043348	643.769	207.776	1079.76	5.19677	2.22083e-06	0.000161841	Up	2.57377	3.65184	1.47236	10.018	17.1681	11.9005														GRMZM2G436448		na	GRMZM5G849989	GRMZM2G035243
Zm00001d047050	#N/A	9.25984	2.99366	15.526	5.18631	0.00940323	0.117657	Up	0.0958396	0.0457084	0.207907	0.211545	0.405885	0.132941		GO:0003677,GO:0006355	DNA binding|regulation of transcription, DNA-templated											#N/A		na	GRMZM2G333777	GRMZM5G849989
Zm00001d051637	GRMZM2G061303	72.0521	23.3985	120.706	5.15871	2.81463e-05	0.00146345	Up	0.497192	0.457131	0.198166	1.34081	2.56474	2.11822		GO:0016021,GO:0006810,GO:0016020,GO:0005215	integral component of membrane|transport|membrane|transporter activity											GRMZM2G097135		na	GRMZM2G333798	GRMZM2G333777
Zm00001d037656	GRMZM2G447795	6.82441	2.21816	11.4307	5.15322	0.0317035	0.261667	Up	0	0.0849816	0.380057	1.02617	0.503117	1.07848		GO:0004553,GO:0005975	hydrolase activity, hydrolyzing O-glycosyl compounds|carbohydrate metabolic process											GRMZM2G060311		Zm00001d027858	GRMZM2G161579	GRMZM2G333798
Zm00001d007153	GRMZM2G010783	55.3362	17.9909	92.6815	5.15157	0.000432944	0.013066	Up	2.48828	1.28803	0.853485	13.1442	5.27617	6.26394		GO:0016021	integral component of membrane											GRMZM2G043191		Zm00001d027858	GRMZM5G853974	GRMZM2G161579
Zm00001d030343	GRMZM2G063024	13.8019	4.49701	23.1069	5.13828	0.0019309	0.0384588	Up	0.059525	0.114078	0.459605	1.37987	1.1371	0.510172		GO:0016021,GO:0016020,GO:0003824,GO:0008152,GO:0006633,GO:0016747	integral component of membrane|membrane|catalytic activity|metabolic process|fatty acid biosynthetic process|transferase activity, transferring acyl groups other than amino-acyl groups											AC191069.3_FG004		Zm00001d027859	GRMZM2G159456	GRMZM5G853974
Zm00001d007773	GRMZM2G444560	274.448	89.4872	459.408	5.13379	0.000489939	0.0142741	Up	3.89631	0.995271	3.71656	24.4799	10.4134	11.1017		GO:0016021,GO:0005524	integral component of membrane|ATP binding											GRMZM2G174615		Zm00001d027861	GRMZM2G124353	GRMZM2G159456
Zm00001d028167	GRMZM2G003506	21.8911	7.14374	36.6384	5.12875	0.0386049	0.294538	Up	0.517221	0.0549937	0.548368	3.82286	1.14634	0.978258		GO:0016021,GO:0055114	integral component of membrane|oxidation-reduction process											GRMZM2G012724		Zm00001d027862	GRMZM2G022363	GRMZM2G124353
Zm00001d040826	GRMZM2G164542	111.468	36.386	186.551	5.12701	2.09699e-12	6.54191e-10	Up	0	5.16587	3.03674	0	4.6072	5.4243		GO:0016021	integral component of membrane											#N/A		Zm00001d027863	GRMZM2G406601	GRMZM2G022363
Zm00001d049954	GRMZM2G134708	1614.72	527.364	2702.08	5.12375	2.87182e-08	3.82227e-06	Up	14.9598	11.1738	15.131	99.2732	62.536	49.259		GO:0016491,GO:0005623,GO:0045454,GO:0050660,GO:0055114	oxidoreductase activity|cell|cell redox homeostasis|flavin adenine dinucleotide binding|oxidation-reduction process											GRMZM2G010044		Zm00001d027864	GRMZM2G303361	GRMZM2G406601
Zm00001d048066	GRMZM2G051689	216.397	70.9172	361.876	5.1028	1.33922e-16	7.58845e-14	Up	1.64879	2.14762	1.54724	9.34979	9.97388	7.76174														GRMZM2G354460		Zm00001d027866	GRMZM2G000199	GRMZM2G303361
Zm00001d010870	GRMZM2G150474	21.2312	6.98081	35.4815	5.08272	8.59172e-05	0.00361986	Up	0.883739	0.155051	0.349043	3.336	2.04512	1.60018		GO:0004364,GO:0005515	glutathione transferase activity|protein binding											GRMZM2G141081		Zm00001d027868	GRMZM2G021498	GRMZM2G000199
Zm00001d044010	GRMZM2G408462	26.7269	8.79326	44.6605	5.07895	2.91998e-05	0.00150975	Up	0	0.184461	0.165421	1.03019	0.562002	0.377473		GO:0006355,GO:0003700,GO:0043565	regulation of transcription, DNA-templated|transcription factor activity, sequence-specific DNA binding|sequence-specific DNA binding											GRMZM2G074672		na	GRMZM2G378130	GRMZM2G021498
Zm00001d004738	GRMZM2G088778	219.737	72.3344	367.14	5.07559	0.00216537	0.0417801	Up	2.12099	0.431747	2.69242	14.6971	6.11106	5.88294		GO:0005515	protein binding											GRMZM2G119967		Zm00001d027869	GRMZM2G142557	GRMZM2G378130
Zm00001d009936	GRMZM2G062974	42.7489	14.1079	71.3898	5.06027	0.000546832	0.0154926	Up	0.688739	1.40261	1.24515	9.13121	4.87167	3.41038		GO:0005975,GO:0004568,GO:0008061,GO:0016998,GO:0006032	carbohydrate metabolic process|chitinase activity|chitin binding|cell wall macromolecule catabolic process|chitin catabolic process											GRMZM5G891656		Zm00001d027869	GRMZM2G142609	GRMZM2G142557
Zm00001d009106	GRMZM2G004519	24.3649	8.04254	40.6873	5.05902	0.00202182	0.0398042	Up	0.33961	0.160476	0.285989	2.23837	0.807266	0.478573		GO:0016021,GO:0008270,GO:0005515	integral component of membrane|zinc ion binding|protein binding											GRMZM2G334660		na	GRMZM2G383778	GRMZM2G142609
Zm00001d043898	GRMZM2G062121	28.6885	9.47466	47.9024	5.05584	0.000119689	0.00480225	Up	0.107304	2.35288	0.286073	6.49215	4.48543	3.30791														GRMZM2G123977		Zm00001d027870	GRMZM2G419901	GRMZM2G383778
Zm00001d025379	GRMZM2G059042	46.8794	15.5071	78.2518	5.04619	5.36353e-05	0.00251551	Up	0.909388	0.860688	0.602764	5.06237	1.96047	3.06698		GO:0004842,GO:0016567,GO:0005488	ubiquitin-protein transferase activity|protein ubiquitination|binding											GRMZM2G075884		Zm00001d027871	GRMZM2G119852	GRMZM2G419901
Zm00001d046801	GRMZM2G452896	248.042	82.2158	413.869	5.03393	0.00164653	0.0341418	Up	1.92952	0.825038	1.72345	13.7589	4.99949	5.09217		GO:0006508,GO:0008236	proteolysis|serine-type peptidase activity											GRMZM2G103843		Zm00001d027872	GRMZM2G119933	GRMZM2G119852
Zm00001d006211	GRMZM2G379563	63.3832	21.0261	105.74	5.029	0.00751472	0.100262	Up	1.33849	0.880869	1.11525	9.95242	2.93071	4.75868														GRMZM2G052671		Zm00001d027873	GRMZM2G419938	GRMZM2G119933
Zm00001d051525	GRMZM2G112456	313.985	104.77	523.2	4.99379	0.00666252	0.0923539	Up	2.62191	1.62319	2.11769	19.3606	6.06656	7.95082		GO:0055085,GO:0016021	transmembrane transport|integral component of membrane											GRMZM2G169261		Zm00001d027874	GRMZM2G000686	GRMZM2G419938
Zm00001d042909	GRMZM2G082199	109.436	36.6572	182.214	4.97075	0.00636251	0.0892648	Up	1.56076	0.92048	3.51288	16.7452	6.03745	6.35521		GO:0005515	protein binding											GRMZM2G111657		Zm00001d027875	GRMZM2G000741	GRMZM2G000686
Zm00001d053212	GRMZM2G037839	44.1065	14.8022	73.4108	4.95944	0.00476534	0.0734539	Up	0.306133	0.701823	0.192002	3.39075	1.0795	1.5708		GO:0008270,GO:0005515	zinc ion binding|protein binding											GRMZM2G474555		Zm00001d027876	GRMZM2G156486	GRMZM2G000741
Zm00001d010812	AC205471.4_FG003	16.8098	5.6423	27.9773	4.95849	0.0117298	0.136697	Up	0.131936	0.212016	0.194826	1.66599	0.701969	0.45178		GO:0006355,GO:0005634,GO:0003700,GO:0043565	regulation of transcription, DNA-templated|nucleus|transcription factor activity, sequence-specific DNA binding|sequence-specific DNA binding											GRMZM2G092391		Zm00001d027877	GRMZM2G178852	GRMZM2G156486
Zm00001d021804	GRMZM2G041418	5.93848	1.99825	9.87871	4.94369	0.046328	0.327469	Up	0.0677896	0	0.118558	0.360633	0.192126	0.161054		GO:0016491,GO:0055114	oxidoreductase activity|oxidation-reduction process											GRMZM2G161625		na	GRMZM2G703504	GRMZM2G178852
Zm00001d042846	GRMZM2G026649	16.269	5.47566	27.0624	4.9423	0.000660726	0.0178802	Up	0.261903	0.588043	0.239888	3.01391	0.977753	1.6591		GO:0016021,GO:0005789	integral component of membrane|endoplasmic reticulum membrane											GRMZM2G137802		Zm00001d027878	GRMZM2G399072	GRMZM2G703504
Zm00001d007403	GRMZM2G151227	501.546	168.877	834.215	4.93977	0.00366064	0.0607024	Up	3.14116	3.51124	16.5786	66.0288	29.5152	25.5498		GO:0003824,GO:0008152,GO:0016746,GO:0016747,GO:0009058	catalytic activity|metabolic process|transferase activity, transferring acyl groups|transferase activity, transferring acyl groups other than amino-acyl groups|biosynthetic process											#N/A		Zm00001d027879	GRMZM2G012102	GRMZM2G399072
Zm00001d014460	GRMZM5G862277	14.0844	4.7435	23.4254	4.93841	0.00196635	0.0390161	Up	0.123302	0	0.202561	0.450443	0.628065	0.553581		GO:0005524,GO:0004672,GO:0006468	ATP binding|protein kinase activity|protein phosphorylation											GRMZM2G347766		Zm00001d027880	GRMZM2G012216	GRMZM2G012102
Zm00001d042948	GRMZM2G123977	165.741	55.954	275.527	4.92418	5.47486e-08	6.49613e-06	Up	1.01653	0.52114	1.8057	7.16363	3.59775	5.14365		GO:0016021,GO:0005515	integral component of membrane|protein binding											GRMZM2G068151		Zm00001d027882	GRMZM2G701969	GRMZM2G012216
Zm00001d026354	GRMZM2G148495	272.336	92.1766	452.496	4.90901	0.010018	0.123075	Up	10.1011	8.28842	5.76803	24.1057	62.4994	31.1172														GRMZM2G467934		Zm00001d027883	AC226243.1_FG003	GRMZM2G701969
Zm00001d046330	GRMZM2G141376	20.5027	6.94118	34.0642	4.90755	0.0404494	0.30403	Up	0.122762	0.118182	0.108244	1.20076	0.186375	0.461823		GO:0016491,GO:0005507,GO:0055114,GO:0005576	oxidoreductase activity|copper ion binding|oxidation-reduction process|extracellular region											GRMZM2G085078		Zm00001d027884	GRMZM5G855347	AC226243.1_FG003
Zm00001d004055	GRMZM2G010765	1045.03	354.164	1735.9	4.9014	2.71363e-22	3.42473e-19	Up	5.10475	9.3352	5.3441	32.9849	32.018	31.6529		GO:0016020,GO:0055085,GO:0015238,GO:0015297,GO:0006855,GO:0016021	membrane|transmembrane transport|drug transmembrane transporter activity|antiporter activity|drug transmembrane transport|integral component of membrane											GRMZM2G002614		Zm00001d027885	GRMZM2G064663	GRMZM5G855347
Zm00001d012482	GRMZM2G036703	36.8425	12.4943	61.1906	4.89748	1.92549e-06	0.00014449	Up	0.2063	0.226129	0.305814	1.69282	1.31347	1.10746		GO:0006355,GO:0003700,GO:0043565	regulation of transcription, DNA-templated|transcription factor activity, sequence-specific DNA binding|sequence-specific DNA binding											GRMZM2G012926		Zm00001d027886	GRMZM2G064732	GRMZM2G064663
Zm00001d047437	AC234171.1_FG001	30.3898	10.3214	50.4583	4.88871	0.000597599	0.0166089	Up	0.346556	0.276948	0.736382	3.77187	1.76194	2.04945		GO:0005524,GO:0004672,GO:0004674,GO:0006468	ATP binding|protein kinase activity|protein serine/threonine kinase activity|protein phosphorylation											GRMZM2G041959		Zm00001d027887	GRMZM2G080524	GRMZM2G064732
Zm00001d013571	GRMZM2G035821	131.352	44.6155	218.088	4.88817	1.24024e-12	4.05121e-10	Up	1.8775	1.91441	2.98212	14.2909	7.82243	10.0755		GO:0008270,GO:0005515	zinc ion binding|protein binding											GRMZM5G845021		Zm00001d027888	GRMZM2G080586	GRMZM2G080524
Zm00001d011164	GRMZM2G160719	5.78537	1.96604	9.60471	4.8853	0.0485713	0.337906	Up	0.209244	0	0	0.75603	0	0.207337														GRMZM2G046583		Zm00001d027890	GRMZM2G016443	GRMZM2G080586
Zm00001d052926	#N/A	11.8282	4.02127	19.6351	4.8828	0.00468321	0.072642	Up	0.217748	0.211839	0.344043	1.49854	1.14162	1.17282														AC209987.4_FG010		Zm00001d027892	GRMZM2G175164	GRMZM2G016443
Zm00001d016896	GRMZM2G049798	93.3401	31.7427	154.938	4.88105	0.0166327	0.171609	Up	1.32936	1.7718	0.918588	5.97765	10.2097	3.02583		GO:0008152,GO:0016758	metabolic process|transferase activity, transferring hexosyl groups											GRMZM2G039630		Zm00001d027893	GRMZM2G017616	GRMZM2G175164
Zm00001d028012	AC166636.1_FG008	86.9966	29.6163	144.377	4.87491	3.75083e-05	0.00184939	Up	0.230633	0.609749	0.413218	3.15158	1.2351	1.63143		GO:0007264,GO:0005525	small GTPase mediated signal transduction|GTP binding											GRMZM2G015588		Zm00001d027894	GRMZM2G319057	GRMZM2G017616
Zm00001d051254	GRMZM2G143669	104.142	35.482	172.803	4.87014	0.000402905	0.0123337	Up	0.865096	0.868704	0.124301	2.47623	4.14365	1.63026														GRMZM2G084486		Zm00001d027895	GRMZM2G017254	GRMZM2G319057
Zm00001d048329	GRMZM2G361256	618.107	211.421	1024.79	4.84717	0.000525472	0.0150612	Up	1.59747	2.75783	0.902509	13.7298	5.41004	6.67022		GO:0016021,GO:0005524,GO:0006810,GO:0055085,GO:0042626,GO:0016887	integral component of membrane|ATP binding|transport|transmembrane transport|ATPase activity, coupled to transmembrane movement of substances|ATPase activity											GRMZM2G327655		Zm00001d027896	GRMZM2G016511	GRMZM2G017254
Zm00001d043200	AC204515.4_FG006	50.6064	17.327	83.8858	4.84134	4.01589e-05	0.00195616	Up	0.461566	0.303853	0.48706	2.94359	1.54708	1.3838														GRMZM2G022679		Zm00001d027897	AC196394.3_FG002	GRMZM2G016511
Zm00001d035646	GRMZM2G156861	20.6254	7.06449	34.1863	4.83918	0.00779819	0.102809	Up	0.312158	0.304492	0	3.13365	0.760763	0.912979		GO:0016301	kinase activity											GRMZM2G124175		Zm00001d027898	GRMZM2G045979	AC196394.3_FG002
Zm00001d008495	GRMZM5G875864	26.4107	9.09122	43.7303	4.81016	0.00181629	0.0366492	Up	0.164466	0.252979	0.25455	2.00172	0.717395	0.843104		GO:0016021,GO:0016757	integral component of membrane|transferase activity, transferring glycosyl groups											GRMZM2G177356		Zm00001d027899	GRMZM2G343157	GRMZM2G045979
Zm00001d030544	GRMZM2G159587	86.9311	29.9755	143.887	4.80015	0.000825847	0.0210364	Up	2.4188	2.53532	1.65216	16.655	6.85665	7.48289		GO:0051287,GO:0008152,GO:0055114,GO:0016616,GO:0005829,GO:0005737,GO:0030267,GO:0016618,GO:0009854	NAD binding|metabolic process|oxidation-reduction process|oxidoreductase activity, acting on the CH-OH group of donors, NAD or NADP as acceptor|cytosol|cytoplasm|glyoxylate reductase (NADP) activity|hydroxypyruvate reductase activity|oxidative photosynthetic carbon pathway											GRMZM2G388585		Zm00001d027900	GRMZM5G838098	GRMZM2G343157
Zm00001d036995	GRMZM2G050875	24.673	8.50774	40.8383	4.80013	7.31501e-05	0.00320349	Up	0.0402412	0.152691	0	0.669608	0.664314	0.383839														GRMZM2G051683		na	AC177911.4_FG005	GRMZM5G838098
Zm00001d047045	#N/A	652.225	225.13	1079.32	4.7942	3.10515e-20	3.07909e-17	Up	4.42988	5.35278	5.74131	22.8529	25.1513	24.3425		GO:0005515	protein binding											GRMZM2G037823		Zm00001d027901	GRMZM2G445634	AC177911.4_FG005
Zm00001d031221	GRMZM5G893912	270.016	93.2134	446.819	4.7935	0.0109481	0.130461	Up	1.59931	3.34983	2.82183	23.355	6.89601	8.2858		GO:0005524	ATP binding											GRMZM2G062121		Zm00001d027902	GRMZM2G445630	GRMZM2G445634
Zm00001d025360	GRMZM2G014022	15.1727	5.24402	25.1014	4.78667	0.00318417	0.0549121	Up	0.128745	0	0.324671	1.23385	1.10332	0.245256		GO:0016021,GO:0005515	integral component of membrane|protein binding											GRMZM2G070199		Zm00001d027903	GRMZM2G147920	GRMZM2G445630
Zm00001d027732	GRMZM2G377780	66.4065	22.9599	109.853	4.78455	5.26845e-07	4.73393e-05	Up	0.47077	0.22621	0.519671	3.50017	2.1165	2.0256		GO:0004252,GO:0006508	serine-type endopeptidase activity|proteolysis											GRMZM2G176568		na	GRMZM2G147910	GRMZM2G147920
Zm00001d052564	GRMZM2G439903	12.6295	4.39106	20.8679	4.75235	0.00507761	0.0766612	Up	0.147765	0.21288	0.130144	1.12582	0.351668	0.277157		GO:0003677,GO:0006355	DNA binding|regulation of transcription, DNA-templated											GRMZM2G091362		Zm00001d027904	GRMZM2G445602	GRMZM2G147910
Zm00001d013223	GRMZM2G076885	203.593	70.8138	336.373	4.7501	0.0133754	0.148617	Up	0.272295	0.237539	0.178983	1.72834	0.576397	0.622826		GO:0051287,GO:0005737,GO:0008652,GO:0055114,GO:0003942,GO:0016620,GO:0050661,GO:0009089,GO:0009086,GO:0009097,GO:0009088,GO:0004073	NAD binding|cytoplasm|cellular amino acid biosynthetic process|oxidation-reduction process|N-acetyl-gamma-glutamyl-phosphate reductase activity|oxidoreductase activity, acting on the aldehyde or oxo group of donors, NAD or NADP as acceptor|NADP binding|lysine biosynthetic process via diaminopimelate|methionine biosynthetic process|isoleucine biosynthetic process|threonine biosynthetic process|asp…											GRMZM2G025190		Zm00001d027905	GRMZM2G445588	GRMZM2G445602
Zm00001d038087	GRMZM2G013657	15.7232	5.47937	25.9671	4.73906	0.00143976	0.0310606	Up	0.0311226	0.0581348	0.038597	0.145259	0.198097	0.199272		GO:0003677,GO:0006351,GO:0006355,GO:0005634,GO:0003700,GO:0007275	DNA binding|transcription, DNA-templated|regulation of transcription, DNA-templated|nucleus|transcription factor activity, sequence-specific DNA binding|multicellular organism development											GRMZM5G853854		Zm00001d027908	AC191071.3_FG001	GRMZM2G445588
Zm00001d012333	GRMZM2G115422	142.412	49.6579	235.167	4.73574	1.63833e-13	5.98528e-11	Up	3.24002	2.40528	0.86583	10.0269	8.6733	10.1062		GO:0016747	transferase activity, transferring acyl groups other than amino-acyl groups											GRMZM2G027958		Zm00001d027908	GRMZM2G000427	AC191071.3_FG001
Zm00001d042553	AC197541.3_FG009	273.004	95.488	450.519	4.71807	0.00963787	0.119676	Up	1.48926	0.824665	4.25645	18.7852	6.58962	7.13525		GO:0016787	hydrolase activity											GRMZM2G121070		na	GRMZM2G061591	GRMZM2G000427
Zm00001d045519	GRMZM5G825515	260.682	91.2169	430.146	4.71564	1.74828e-05	0.000968885	Up	1.09317	0.895862	1.9298	9.46782	5.49311	4.27442		GO:0055085,GO:0016021	transmembrane transport|integral component of membrane											GRMZM2G423331		Zm00001d027916	GRMZM2G097434	GRMZM2G061591
Zm00001d034356	GRMZM2G308687	3238.42	1134.9	5341.95	4.707	5.42074e-17	3.3446e-14	Up	79.8521	86.8486	107.11	333.418	393.173	264.855		GO:0005515	protein binding											GRMZM2G127134		Zm00001d027919	GRMZM2G145308	GRMZM2G097434
Zm00001d043037	GRMZM2G014945	13.8893	4.87051	22.9081	4.70342	0.00393498	0.0640039	Up	0	0.155755	0.2775	0.853318	1.53121	2.16546														GRMZM2G118369		Zm00001d027921	GRMZM2G115105	GRMZM2G145308
Zm00001d052545	GRMZM2G419777	25.8225	9.07015	42.5748	4.69395	6.88252e-05	0.00305261	Up	0.286937	0	0.258328	2.02191	1.87471	0.804997														GRMZM2G123107		Zm00001d027922	GRMZM2G115182	GRMZM2G115105
Zm00001d034457	GRMZM2G016150	48.0535	16.9299	79.1772	4.67677	0.00144565	0.0311167	Up	0.232828	0.403243	0	1.49648	0.469476	1.00147		GO:0006355,GO:0003700,GO:0043565	regulation of transcription, DNA-templated|transcription factor activity, sequence-specific DNA binding|sequence-specific DNA binding											GRMZM2G054900		Zm00001d027924	GRMZM2G129674	GRMZM2G115182
Zm00001d022394	GRMZM2G326263	32.7511	11.5881	53.9141	4.65255	1.1075e-05	0.000651475	Up	0.135394	0.128727	0.18105	0.670444	0.651025	0.619113														GRMZM2G040890		Zm00001d027925	GRMZM2G018984	GRMZM2G129674
Zm00001d051843	GRMZM2G019209	10.6463	3.77287	17.5196	4.64359	0.0094685	0.118367	Up	0.169585	0	0.146891	0.30277	0.547049	0.480761		GO:0055085,GO:0016021	transmembrane transport|integral component of membrane											GRMZM2G148087		Zm00001d027928	AC206951.3_FG016	GRMZM2G018984
Zm00001d029688	GRMZM2G066441	449.339	159.536	739.142	4.63307	2.69873e-18	1.97185e-15	Up	3.6923	1.93087	4.77184	17.7958	17.1243	13.8458		GO:0020037,GO:0005506,GO:0016705,GO:0055114,GO:0004497,GO:0016021	heme binding|iron ion binding|oxidoreductase activity, acting on paired donors, with incorporation or reduction of molecular oxygen|oxidation-reduction process|monooxygenase activity|integral component of membrane											#N/A		Zm00001d027929	AC206951.3_FG017	AC206951.3_FG016
Zm00001d033068	GRMZM2G084486	127.405	45.3226	209.488	4.62215	0.0143505	0.155927	Up	1.1337	0.445025	0.689596	6.65588	1.80301	2.39641		GO:0016021,GO:0016020,GO:0015079,GO:0071805	integral component of membrane|membrane|potassium ion transmembrane transporter activity|potassium ion transmembrane transport											GRMZM2G394027		Zm00001d027930	GRMZM2G015234	AC206951.3_FG017
Zm00001d037857	GRMZM2G087740	38.5982	13.7684	63.4281	4.60679	2.70197e-06	0.000191867	Up	1.44612	0.699157	0.925173	3.73194	5.5451	4.56433														GRMZM2G043878		Zm00001d027932	GRMZM2G496991	GRMZM2G015234
Zm00001d047046	#N/A	204.216	72.8901	335.541	4.60338	1.77777e-14	7.0514e-12	Up	1.12567	1.13113	1.56966	5.84794	6.447	5.90634		GO:0005525	GTP binding											GRMZM2G134205		Zm00001d027934	GRMZM2G153393	GRMZM2G496991
Zm00001d045913	GRMZM2G369481	6.69141	2.39282	10.99	4.59291	0.0364789	0.285145	Up	0	0.653476	0.196996	1.57268	1.05608	1.2625														GRMZM2G127251		Zm00001d027935	GRMZM2G457118	GRMZM2G153393
Zm00001d027695	GRMZM2G413315	87.652	31.3747	143.929	4.58744	0.0333609	0.270521	Up	4.01552	3.59331	3.7448	4.60917	24.7572	31.0107		GO:0009055,GO:0005623,GO:0045454,GO:0015035	electron carrier activity|cell|cell redox homeostasis|protein disulfide oxidoreductase activity											GRMZM2G459110		Zm00001d027936	GRMZM2G410515	GRMZM2G457118
Zm00001d012785	GRMZM2G036409	14.0255	5.02039	23.0305	4.58739	0.00263826	0.0478454	Up	0.130095	0.125169	0.305155	1.39241	0.850224	0.484152		GO:0008152,GO:0016758	metabolic process|transferase activity, transferring hexosyl groups											GRMZM2G049798		Zm00001d027936	GRMZM5G815358	GRMZM2G410515
Zm00001d047889	GRMZM2G085409	10.4404	3.74066	17.1402	4.58213	0.0090732	0.114456	Up	0	0.00946814	0.0139123	0.0525468	0.050349	0.0171742		GO:0007165	signal transduction											GRMZM2G079219		Zm00001d027937	GRMZM2G410623	GRMZM5G815358
Zm00001d051166	GRMZM2G063917	59.2118	21.3123	97.1113	4.55658	0.0276642	0.238539	Up	0.627066	0.504424	0.638575	5.02671	1.45348	1.81553		GO:0005737,GO:0003824,GO:0006559,GO:0045548,GO:0009800,GO:0016841	cytoplasm|catalytic activity|L-phenylalanine catabolic process|phenylalanine ammonia-lyase activity|cinnamic acid biosynthetic process|ammonia-lyase activity											GRMZM2G079109		Zm00001d027938	GRMZM2G109431	GRMZM2G410623
Zm00001d016841	GRMZM5G836353	965.052	350.152	1579.95	4.51219	9.66075e-18	6.87771e-15	Up	15.6815	14.5685	12.4815	79.2943	63.3557	52.2666		GO:0016491,GO:0055114,GO:0071949,GO:0016021	oxidoreductase activity|oxidation-reduction process|FAD binding|integral component of membrane											#N/A		Zm00001d027939	GRMZM2G109480	GRMZM2G109431
Zm00001d040445	GRMZM2G305264	51.6598	18.7622	84.5574	4.50679	0.000103473	0.00426861	Up	0.809247	0.678838	1.21018	2.70473	4.95046	3.30741		GO:0008270,GO:0005515	zinc ion binding|protein binding											GRMZM2G157522		Zm00001d027940	GRMZM2G109586	GRMZM2G109480
Zm00001d028962	GRMZM2G030272	73.2796	26.6294	119.93	4.50367	3.47926e-06	0.000242109	Up	1.71512	2.59622	1.02408	13.2588	7.88323	6.88443		GO:0006355,GO:0003700,GO:0043565	regulation of transcription, DNA-templated|transcription factor activity, sequence-specific DNA binding|sequence-specific DNA binding											GRMZM2G171852		Zm00001d027941	GRMZM2G109589	GRMZM2G109586
Zm00001d010459	GRMZM2G170552	47.4543	17.2495	77.659	4.5021	0.000811384	0.0208593	Up	0.465314	0.280027	0.32485	2.52893	1.14187	0.99971		GO:0005524,GO:0004672,GO:0004674,GO:0007165,GO:0006468	ATP binding|protein kinase activity|protein serine/threonine kinase activity|signal transduction|protein phosphorylation											GRMZM5G841893		Zm00001d027942	GRMZM2G410700	GRMZM2G109589
Zm00001d047952	GRMZM2G081458	63.9498	23.2554	104.644	4.49978	0.00210816	0.0409676	Up	0.70541	0.10128	0.671804	4.32542	1.3068	1.90815		GO:0043531	ADP binding											#N/A		Zm00001d027942	GRMZM2G410704	GRMZM2G410700
Zm00001d018965	GRMZM2G328171	163.683	59.6722	267.694	4.48607	1.36024e-07	1.47527e-05	Up	3.34576	4.23369	3.07555	24.6423	10.1865	14.6547		GO:0004553,GO:0005975	hydrolase activity, hydrolyzing O-glycosyl compounds|carbohydrate metabolic process											GRMZM2G042933		Zm00001d027943	GRMZM2G113351	GRMZM2G410704
Zm00001d011846	GRMZM2G356714	25.8337	9.42822	42.2392	4.48008	0.000167181	0.00623057	Up	0.186589	0.357071	1.03793	1.71436	2.90807	2.46891		GO:0051103,GO:0003909	DNA ligation involved in DNA repair|DNA ligase activity											GRMZM2G074821		Zm00001d027944	GRMZM2G113401	GRMZM2G113351
Zm00001d010025	GRMZM2G058358	12.7729	4.67909	20.8667	4.45957	0.0237413	0.216337	Up	0	3.91642	0	3.47202	0	3.75311		GO:0009611,GO:0004867	response to wounding|serine-type endopeptidase inhibitor activity											GRMZM2G093736		Zm00001d027945	AC211261.3_FG017	GRMZM2G113401
Zm00001d029662	GRMZM2G143703	86.2492	31.6089	140.889	4.45726	0.00142156	0.0308598	Up	1.44702	1.09062	2.38243	11.8496	5.67361	5.27762		GO:0016021	integral component of membrane											GRMZM2G106177		Zm00001d027946	GRMZM2G061806	AC211261.3_FG017
Zm00001d027925	GRMZM2G018984	13.2219	4.86118	21.5825	4.43978	0.00356082	0.0596297	Up	0.345111	0	0.196074	1.2568	0.483334	1.0639		GO:0003677,GO:0006351,GO:0006355,GO:0005634,GO:0003700	DNA binding|transcription, DNA-templated|regulation of transcription, DNA-templated|nucleus|transcription factor activity, sequence-specific DNA binding											GRMZM2G170281		Zm00001d027947	GRMZM2G056469	GRMZM2G061806
Zm00001d020395	GRMZM2G074672	117.691	43.2869	192.094	4.4377	0.00333361	0.0568426	Up	1.9491	4.30968	3.7978	7.26868	20.3308	16.8849		GO:0016021	integral component of membrane											GRMZM2G065292		Zm00001d027948	GRMZM2G114918	GRMZM2G056469
Zm00001d016219	GRMZM2G174128	94.915	35.1055	154.725	4.40741	4.31175e-07	3.97727e-05	Up	0.618768	0.420249	0.656974	3.93182	2.05268	1.86386		GO:0005515	protein binding											#N/A		Zm00001d027949	GRMZM2G093125	GRMZM2G114918
Zm00001d048417	GRMZM5G841893	66.1179	24.4857	107.75	4.40053	3.4234e-08	4.36013e-06	Up	0.72563	0.55504	1.99077	5.88446	3.543	5.29179		GO:0016491,GO:0055114,GO:0071949	oxidoreductase activity|oxidation-reduction process|FAD binding											GRMZM2G311036		Zm00001d027950	AC209626.2_FG013	GRMZM2G093125
Zm00001d011577	#N/A	40.254	14.9175	65.5904	4.39687	0.013913	0.152806	Up	0.0599325	0.191077	0.240984	0.359644	1.08271	0.727756		GO:0009055,GO:0045454,GO:0015035	electron carrier activity|cell redox homeostasis|protein disulfide oxidoreductase activity											GRMZM2G107639		Zm00001d027950	GRMZM2G093197	AC209626.2_FG013
Zm00001d043654	AC207628.4_FG010	25.1792	9.33771	41.0208	4.39302	0.000109588	0.00448115	Up	0.65172	0.436415	0.338317	2.86199	2.01933	2.37365		GO:0008152,GO:0008168	metabolic process|methyltransferase activity											#N/A		Zm00001d027951	GRMZM2G059020	GRMZM2G093197
Zm00001d016417	GRMZM2G008935	11.4455	4.24489	18.6461	4.3926	0.00980844	0.121385	Up	0.215839	0.206385	0.551164	2.08535	1.43193	1.63517		GO:0008152,GO:0016758	metabolic process|transferase activity, transferring hexosyl groups											GRMZM2G175071		Zm00001d027954	GRMZM2G358311	GRMZM2G059020
Zm00001d025361	GRMZM2G047065	10.0726	3.73695	16.4082	4.39079	0.014652	0.157593	Up	0.363103	1.10048	0.679962	0.321627	1.34885	0.693362														GRMZM2G389155		Zm00001d027957	GRMZM2G059102	GRMZM2G358311
Zm00001d021695	GRMZM2G431039	405.457	150.481	660.434	4.38881	0.000257395	0.00871533	Up	5.91096	3.32241	4.70804	33.5061	14.4996	16.3294		GO:0004553,GO:0005975	hydrolase activity, hydrolyzing O-glycosyl compounds|carbohydrate metabolic process											GRMZM2G138423		Zm00001d027958	GRMZM2G065317	GRMZM2G059102
Zm00001d032069	GRMZM2G101245	26.0221	9.69948	42.3447	4.36567	0.000107574	0.00441181	Up	0.273155	0.163743	0.474337	1.85527	0.92779	1.24544		GO:0005524,GO:0004672,GO:0006468	ATP binding|protein kinase activity|protein phosphorylation											GRMZM2G160515		Zm00001d027962	GRMZM2G023575	GRMZM2G065317
Zm00001d002503	GRMZM2G032218	6098.58	2278.91	9918.25	4.35219	2.12225e-21	2.35697e-18	Up	12.2035	12.3666	9.89997	47.7643	54.3212	42.0706		GO:0016021,GO:0005524,GO:0006810,GO:0055085,GO:0042626,GO:0016887	integral component of membrane|ATP binding|transport|transmembrane transport|ATPase activity, coupled to transmembrane movement of substances|ATPase activity											GRMZM2G363554		Zm00001d027963	GRMZM2G023983	GRMZM2G023575
Zm00001d018940	GRMZM2G425728	1129.27	422.694	1835.84	4.34318	1.41948e-19	1.31372e-16	Up	10.4273	4.274	15.3135	44.672	36.0666	30.8029														GRMZM5G863596		Zm00001d027963	GRMZM2G356204	GRMZM2G023983
Zm00001d031449	GRMZM5G822593	227.308	85.254	369.362	4.33249	0.000713464	0.0188932	Up	2.60824	0.798158	2.20636	13.9599	6.52088	6.00461		GO:0046872,GO:0016491,GO:0016702,GO:0055114,GO:0005515	metal ion binding|oxidoreductase activity|oxidoreductase activity, acting on single donors with incorporation of molecular oxygen, incorporation of two atoms of oxygen|oxidation-reduction process|protein binding											GRMZM2G054221		Zm00001d027964	AC177850.2_FG003	GRMZM2G356204
Zm00001d041076	GRMZM2G061732	205.613	77.558	333.668	4.30217	8.107e-09	1.23e-06	Up	3.05448	3.27935	4.39273	21.408	12.1368	11.2599														GRMZM2G011491		Zm00001d027965	GRMZM2G024099	AC177850.2_FG003
Zm00001d048358	GRMZM2G009808	2826.98	1066.76	4587.2	4.30014	1.00351e-07	1.12803e-05	Up	11.6425	7.28621	10.8002	60.0323	31.6856	34.8189		GO:0008152	metabolic process											AC185254.4_FG002		Zm00001d027966	GRMZM2G025078	GRMZM2G024099
Zm00001d038052	GRMZM2G041961	25.7026	9.70188	41.7034	4.29848	0.000559161	0.0157775	Up	0.862271	0.47138	0.0477163	1.98168	1.3746	2.95025		GO:0004553,GO:0005975	hydrolase activity, hydrolyzing O-glycosyl compounds|carbohydrate metabolic process											#N/A		Zm00001d027967	AC177850.2_FG005	GRMZM2G025078
Zm00001d029501	GRMZM2G313104	24.1106	9.10236	39.1189	4.29767	0.000189583	0.00691692	Up	0.711707	0.56841	0.505172	2.61385	2.71647	1.70805														AC233955.1_FG008		Zm00001d027967	GRMZM5G821686	AC177850.2_FG005
Zm00001d016429	GRMZM2G161625	15.4146	5.82067	25.0086	4.29652	0.030113	0.252594	Up	0.776889	1.02974	0.666635	6.91088	2.03677	2.29583		GO:0008152,GO:0016758	metabolic process|transferase activity, transferring hexosyl groups											GRMZM2G178356		Zm00001d027969	GRMZM2G385605	GRMZM5G821686
Zm00001d029246	GRMZM2G442387	16.2181	6.13348	26.3028	4.28839	0.0263612	0.231737	Up	0.0957161	0.153179	0.109825	1.33338	0.516597	0.395996		GO:0005515,GO:0005488	protein binding|binding											GRMZM2G046848		Zm00001d027971	GRMZM2G106017	GRMZM2G385605
Zm00001d048169	GRMZM2G181566	8.29151	3.14354	13.4395	4.27528	0.0272015	0.235868	Up	0.264756	0.128186	0	0.408423	0.496393	0.862526		GO:0016021	integral component of membrane											GRMZM2G701218		Zm00001d027973	GRMZM2G053627	GRMZM2G106017
Zm00001d040071	GRMZM2G104829	9.76143	3.70846	15.8144	4.26441	0.0193147	0.19037	Up	0.0496772	0.0959712	0.170337	0.352097	0.189022	0.332989		GO:0016757	transferase activity, transferring glycosyl groups											GRMZM2G026889		Zm00001d027975	GRMZM2G398848	GRMZM2G053627
Zm00001d034551	GRMZM2G092746	332.093	126.495	537.691	4.25067	0.000405269	0.0123732	Up	0.966522	0.686019	0.507526	5.01193	2.21134	2.40884		GO:0005975,GO:0071555,GO:0005576,GO:0004650	carbohydrate metabolic process|cell wall organization|extracellular region|polygalacturonase activity											GRMZM2G477609		Zm00001d027976	GRMZM2G009326	GRMZM2G398848
Zm00001d053424	GRMZM2G100234	15.8103	6.04801	25.5727	4.22828	0.00235873	0.0442201	Up	0.0790351	0.0760246	0.105341	0.681195	0.369789	0.254252		GO:0005524,GO:0004672,GO:0006468,GO:0005515	ATP binding|protein kinase activity|protein phosphorylation|protein binding											GRMZM2G108714		na	GRMZM2G117556	GRMZM2G009326
Zm00001d034688	GRMZM2G477609	28.1071	10.7773	45.437	4.21601	0.00289229	0.050987	Up	0.559747	1.7248	0.0712412	5.1471	3.05369	1.85493		GO:0016021	integral component of membrane											GRMZM2G111872		Zm00001d027978	GRMZM2G117491	GRMZM2G117556
Zm00001d019228	GRMZM2G093276	666.475	255.956	1076.99	4.20774	6.83776e-13	2.31525e-10	Up	13.5273	13.9907	15.5535	79.7716	51.7542	52.352		GO:0016021,GO:0016020,GO:0055085,GO:0030001,GO:0046873,GO:0005385,GO:0071577	integral component of membrane|membrane|transmembrane transport|metal ion transport|metal ion transmembrane transporter activity|zinc ion transmembrane transporter activity|zinc II ion transmembrane transport											GRMZM2G164640		Zm00001d027979	GRMZM2G005043	GRMZM2G117491
Zm00001d040836	GRMZM2G110286	33.2793	12.7823	53.7763	4.20708	0.0012444	0.0279763	Up	0.499159	0.513364	0.948017	2.76405	7.78725	4.04379		GO:0009055,GO:0005623,GO:0045454,GO:0015035	electron carrier activity|cell|cell redox homeostasis|protein disulfide oxidoreductase activity											GRMZM5G846916		Zm00001d027982	GRMZM2G031177	GRMZM2G005043
Zm00001d038718	GRMZM2G168898	156.158	60.4489	251.867	4.1666	4.86732e-12	1.42254e-09	Up	2.87956	2.46142	2.49572	11.6646	11.2213	11.1819		GO:0020037,GO:0019825,GO:0046872,GO:0006631,GO:0019432	heme binding|oxygen binding|metal ion binding|fatty acid metabolic process|triglyceride biosynthetic process											GRMZM5G849600		Zm00001d027983	GRMZM2G148706	GRMZM2G031177
Zm00001d038303	GRMZM2G161507	21.0157	8.13544	33.896	4.16647	0.0024599	0.0456851	Up	0.0783281	0.0500562	0.167099	0.344806	0.0976132	0.0940729														GRMZM2G163494		na	GRMZM2G148726	GRMZM2G148706
Zm00001d043271	GRMZM2G169782	11.689	4.53352	18.8444	4.15669	0.00925638	0.116344	Up	0.0582412	0.223799	0	0.336056	0.441065	0.440532		GO:0005515	protein binding											GRMZM2G159926		Zm00001d027986	GRMZM2G006626	GRMZM2G148726
Zm00001d038764	AC206788.3_FG015	2090.07	812.57	3367.56	4.14433	1.34567e-17	9.34062e-15	Up	23.3932	33.0355	38.553	173.434	132.175	110.255		GO:0008152,GO:0016758	metabolic process|transferase activity, transferring hexosyl groups											GRMZM2G059042		Zm00001d027987	GRMZM2G006631	GRMZM2G006626
Zm00001d009549	GRMZM2G359664	138.433	53.8436	223.022	4.14204	3.90584e-11	9.34875e-09	Up	0.397917	0.467376	0.429518	1.59199	1.94693	1.75345		GO:0005089,GO:0016301	Rho guanyl-nucleotide exchange factor activity|kinase activity											GRMZM2G063880		Zm00001d027988	AC177946.2_FG004	GRMZM2G006631
Zm00001d049054	GRMZM2G545326	167.991	65.3845	270.598	4.13856	2.27223e-10	4.77944e-08	Up	1.37179	1.28171	1.21619	4.64131	5.14299	6.04821		GO:0016021,GO:0008234,GO:0006508	integral component of membrane|cysteine-type peptidase activity|proteolysis											GRMZM2G151921		Zm00001d027988	GRMZM2G006676	AC177946.2_FG004
Zm00001d052410	GRMZM2G071288	76.9715	29.9651	123.978	4.13742	0.00830742	0.107682	Up	0.0753293	0.0848642	0.236527	1.02291	0.388002	0.400526		GO:0016021,GO:0009507,GO:0009941	integral component of membrane|chloroplast|chloroplast envelope											GRMZM2G063917		Zm00001d027991	GRMZM2G132367	GRMZM2G006676
Zm00001d046277	GRMZM2G012465	368.927	143.812	594.041	4.13067	1.35188e-15	6.36187e-13	Up	0.758974	0.733294	0.84861	3.79586	2.98591	2.61003		GO:0005524,GO:0016020,GO:0016887,GO:0016021	ATP binding|membrane|ATPase activity|integral component of membrane											GRMZM2G092746		Zm00001d027992	GRMZM2G075712	GRMZM2G132367
Zm00001d006755	GRMZM2G079082	11.8694	4.63575	19.1031	4.12081	0.010757	0.128792	Up	0	0.111875	0.0593376	0.387151	0.180861	0.139343		GO:0043531	ADP binding											GRMZM2G027972		Zm00001d027994	GRMZM2G095915	GRMZM2G075712
Zm00001d039183	GRMZM2G175593	98.3263	38.4584	158.194	4.11338	0.0121937	0.140421	Up	0.727247	0.228887	0.977967	4.48212	1.51568	1.79189		GO:0005524,GO:0016020	ATP binding|membrane											GRMZM2G169240		Zm00001d027995	GRMZM2G397055	GRMZM2G095915
Zm00001d044620	GRMZM2G166671	11.3734	4.45176	18.2951	4.10964	0.00997985	0.122872	Up	0.0137392	0.0259751	0.0192693	0.132925	0.0189283	0.0943266		GO:0005515	protein binding											GRMZM2G031062		Zm00001d027996	GRMZM2G154007	GRMZM2G397055
Zm00001d023720	GRMZM2G091891	44.2012	17.3202	71.0822	4.10401	2.77669e-06	0.00019617	Up	0.546183	0.709677	0.261067	2.87288	1.57325	2.07923		GO:0016021,GO:0071705	integral component of membrane|nitrogen compound transport											GRMZM2G057779		Zm00001d027997	GRMZM2G039129	GRMZM2G154007
Zm00001d045812	GRMZM2G073123	81.2872	31.8536	130.721	4.10379	0.0204103	0.196626	Up	1.13233	1.09115	2.32452	14.1057	4.79474	5.51392														#N/A		Zm00001d027998	GRMZM2G420357	GRMZM2G039129
Zm00001d042633	GRMZM2G078667	11.6556	4.57315	18.7381	4.09743	0.0161444	0.168261	Up	0.149268	0.425136	0.129519	2.22634	1.26232	0														GRMZM2G041699		Zm00001d027999	GRMZM2G097283	GRMZM2G420357
Zm00001d009814	GRMZM2G073884	971.687	381.495	1561.88	4.0941	0.00240508	0.0449678	Up	2.81399	2.76082	7.61772	29.2283	10.8561	13.9876		GO:0005524,GO:0004672,GO:0006468,GO:0005515	ATP binding|protein kinase activity|protein phosphorylation|protein binding											GRMZM2G133095		Zm00001d028001	GRMZM2G398603	GRMZM2G097283
Zm00001d053960	GRMZM2G010044	237.122	93.2815	380.963	4.08402	1.9531e-10	4.2037e-08	Up	1.7733	1.56033	3.34973	7.37936	8.39569	10.2177		GO:0051539,GO:0008152,GO:0008652,GO:0016836	4 iron, 4 sulfur cluster binding|metabolic process|cellular amino acid biosynthetic process|hydro-lyase activity											GRMZM5G842695		Zm00001d028003	GRMZM2G164527	GRMZM2G398603
Zm00001d043221	AC233851.1_FG009	29.7975	11.7243	47.8707	4.08303	7.30273e-05	0.00320316	Up	0.284183	0	0	1.11187	0.732822	0.367409														GRMZM5G851862		Zm00001d028005	GRMZM2G113821	GRMZM2G164527
Zm00001d009365	GRMZM2G324903	228.061	90.1329	365.989	4.06055	1.67301e-10	3.6866e-08	Up	1.60967	1.86459	1.78763	9.82396	5.95848	6.49663														GRMZM2G002131		Zm00001d028006	GRMZM2G113775	GRMZM2G113821
Zm00001d041772	GRMZM2G019090	609.103	241.045	977.16	4.05384	0.000439513	0.0132354	Up	7.9212	1.74697	3.17509	27.0419	11.4298	11.5817		GO:0005515,GO:0005737,GO:0003824,GO:0009072	protein binding|cytoplasm|catalytic activity|aromatic amino acid family metabolic process											#N/A		Zm00001d028007	GRMZM2G447551	GRMZM2G113775
Zm00001d049727	AC193632.2_FG002	415.023	164.337	665.709	4.05086	8.68448e-14	3.25844e-11	Up	2.91134	4.74491	3.8953	13.852	17.9206	15.4221		GO:0005524,GO:0004553,GO:0005975,GO:0004672,GO:0006468	ATP binding|hydrolase activity, hydrolyzing O-glycosyl compounds|carbohydrate metabolic process|protein kinase activity|protein phosphorylation											GRMZM2G004858		Zm00001d028008	GRMZM2G147481	GRMZM2G447551
Zm00001d048635	GRMZM2G455909	677.076	268.19	1085.96	4.04922	2.45743e-07	2.45434e-05	Up	5.62725	1.38818	2.02831	10.2817	12.9663	13.8091		GO:0043531	ADP binding											GRMZM2G440003		na	GRMZM2G015801	GRMZM2G147481
Zm00001d040100	GRMZM2G177991	36.6701	14.5267	58.8135	4.04866	3.5572e-05	0.00177	Up	0.597146	1.14743	2.18138	7.87022	3.39214	5.07854														GRMZM2G076394		Zm00001d028009	GRMZM2G015571	GRMZM2G015801
Zm00001d017849	GRMZM2G459110	47.0663	18.6483	75.4844	4.0478	0.0056909	0.0826889	Up	0.715554	0.369853	1.46626	5.98334	2.65585	2.08352														GRMZM2G117993		Zm00001d028010	GRMZM2G006781	GRMZM2G015571
Zm00001d032618	GRMZM2G153208	166.551	66.0883	267.013	4.04025	0.0339283	0.273684	Up	3.58314	2.41891	5.03556	29.3023	8.71504	9.4839														AC203294.3_FG008		na	GRMZM5G848285	GRMZM2G006781
Zm00001d052433	GRMZM2G022799	7.45303	2.95774	11.9483	4.03967	0.0496256	0.34275	Up	0	0.367864	0.261632	0.821284	0.735611	1.0384		GO:0008234,GO:0048046	cysteine-type peptidase activity|apoplast											GRMZM2G545326		Zm00001d028011	AC166636.1_FG007	GRMZM5G848285
Zm00001d024300	GRMZM2G009353	76.6087	30.4135	122.804	4.03781	3.03898e-08	3.96138e-06	Up	0.134373	0.371095	0.21615	1.07833	0.760334	0.906959		GO:0016020,GO:0015079,GO:0071805,GO:0016021	membrane|potassium ion transmembrane transporter activity|potassium ion transmembrane transport|integral component of membrane											GRMZM2G089400		Zm00001d028012	AC166636.1_FG008	AC166636.1_FG007
Zm00001d012322	GRMZM2G031945	177.532	70.4879	284.575	4.03722	0.000266062	0.00892176	Up	2.12689	2.15309	2.31311	13.9418	6.19021	7.14909		GO:0020037,GO:0005506,GO:0016705,GO:0055114,GO:0004497	heme binding|iron ion binding|oxidoreductase activity, acting on paired donors, with incorporation or reduction of molecular oxygen|oxidation-reduction process|monooxygenase activity											GRMZM2G151204		Zm00001d028013	AC166636.1_FG009	AC166636.1_FG008
Zm00001d030165	GRMZM2G143625	106.744	42.5537	170.935	4.01692	0.0479347	0.335156	Up	0.581019	1.3036	3.59253	16.3304	3.44339	4.67185		GO:0016491,GO:0055114,GO:0006631,GO:0045300	oxidoreductase activity|oxidation-reduction process|fatty acid metabolic process|acyl-[acyl-carrier-protein] desaturase activity											GRMZM2G413315		Zm00001d028015	GRMZM2G445296	AC166636.1_FG009
Zm00001d044605	GRMZM2G354558	48.8973	19.6152	78.1794	3.98566	2.9294e-05	0.0015118	Up	0.429728	0.381706	0.912979	3.21494	2.35283	1.48648		GO:0016021,GO:0006629,GO:0055114,GO:0016717	integral component of membrane|lipid metabolic process|oxidation-reduction process|oxidoreductase activity, acting on paired donors, with oxidation of a pair of donors resulting in the reduction of molecular oxygen to two molecules of water											GRMZM2G032244		Zm00001d028016	GRMZM5G874665	GRMZM2G445296
Zm00001d026056	GRMZM2G152135	1285.71	515.898	2055.52	3.98436	5.79067e-06	0.000376529	Up	4.74092	17.0046	15.7333	69.7279	39.0109	36.4629		GO:0016021,GO:0016491,GO:0005506,GO:0006633,GO:0055114	integral component of membrane|oxidoreductase activity|iron ion binding|fatty acid biosynthetic process|oxidation-reduction process											GRMZM2G170016		Zm00001d028017	GRMZM2G003466	GRMZM5G874665
Zm00001d045279	AC206266.3_FG001	35.0761	14.0769	56.0752	3.98349	0.000486729	0.0142081	Up	0.978342	0.153504	1.47156	2.27799	4.26293	3.64553		GO:0016021,GO:0005524,GO:0006810,GO:0055085,GO:0042626,GO:0016887	integral component of membrane|ATP binding|transport|transmembrane transport|ATPase activity, coupled to transmembrane movement of substances|ATPase activity											GRMZM2G042343		Zm00001d028018	GRMZM2G003520	GRMZM2G003466
Zm00001d053409	GRMZM2G018707	36.0212	14.4603	57.582	3.98206	0.000218613	0.00771229	Up	0.193705	0.280786	0.557211	2.18186	1.09517	1.41075														GRMZM2G024196		Zm00001d028018	GRMZM2G028136	GRMZM2G003520
Zm00001d046300	GRMZM2G400167	37.901	15.2228	60.5792	3.9795	3.75674e-05	0.00184939	Up	0.652456	0.719028	0.427582	1.57986	2.91241	2.50052														GRMZM2G022699		Zm00001d028019	GRMZM2G028247	GRMZM2G028136
Zm00001d000113	#N/A	213.765	85.9609	341.569	3.97354	2.8338e-05	0.00147066	Up	3.35415	5.27307	2.59941	8.27525	12.6696	14.5453		GO:0003824	catalytic activity											GRMZM2G093195		Zm00001d028020	GRMZM2G432566	GRMZM2G028247
Zm00001d048111	GRMZM2G113423	16.8767	6.81237	26.9411	3.95473	0.0026071	0.0474974	Up	0.0581378	0.110555	0.0683562	0.499897	0.16874	0.232266		GO:0005516	calmodulin binding											GRMZM2G103357		Zm00001d028022	GRMZM2G002002	GRMZM2G432566
Zm00001d016806	GRMZM2G031581	13.0701	5.28795	20.8522	3.94335	0.00686144	0.094171	Up	0.262844	0.167893	0.0746992	0.812478	0.415262	0.832755		GO:0016757	transferase activity, transferring glycosyl groups											GRMZM2G026151		Zm00001d028024	GRMZM2G134367	GRMZM2G002002
Zm00001d036550	GRMZM2G089400	30.3077	12.2725	48.3429	3.93913	0.0227995	0.210761	Up	0.952975	0.688206	0.207775	4.62584	2.24323	1.5541														GRMZM2G175593		Zm00001d028025	GRMZM2G155086	GRMZM2G134367
Zm00001d032322	GRMZM2G115635	36.9149	14.9837	58.8461	3.92734	2.78295e-05	0.00145107	Up	0.279779	0.277539	0.328766	1.13582	0.788812	0.858684		GO:0006810,GO:0016020,GO:0005215,GO:0055085	transport|membrane|transporter activity|transmembrane transport											GRMZM2G413652		Zm00001d028034	GRMZM5G808775	GRMZM2G155086
Zm00001d021119	GRMZM2G108133	6998.71	2848.85	11148.6	3.91336	1.50014e-18	1.19004e-15	Up	22.1311	32.6332	27.8149	106.18	121.813	92.1159		GO:0004553,GO:0005975	hydrolase activity, hydrolyzing O-glycosyl compounds|carbohydrate metabolic process											GRMZM2G035719		Zm00001d028035	GRMZM2G013855	GRMZM5G808775
Zm00001d034745	GRMZM2G119755	49.2233	20.0605	78.386	3.90748	3.66799e-06	0.000252083	Up	2.23093	0.885421	3.88167	10.8768	6.43375	11.6471	Cell number regulator 7 [Source:Uniprot/SWISSPROT;Acc:D9HP23]	GO:0016021	integral component of membrane											GRMZM2G574887		Zm00001d028036	GRMZM2G120631	GRMZM2G013855
Zm00001d017507	GRMZM2G071468	10.2517	4.18791	16.3156	3.89587	0.0439933	0.317209	Up	0.106759	0	0.276413	0.397214	0.314287	0.667566		GO:0006359,GO:0000126,GO:0001026	regulation of transcription from RNA polymerase III promoter|transcription factor TFIIIB complex|TFIIIB-type transcription factor activity											GRMZM2G149700		Zm00001d028037	GRMZM2G029000	GRMZM2G120631
Zm00001d020780	GRMZM2G416632	562.646	230.218	895.074	3.88794	0.00065804	0.0178597	Up	13.687	19.0091	15.879	102.843	46.2562	48.8648	Glutathione transferase GST 23 [Source:Uniprot/SWISSPROT;Acc:Q9FQA3]	GO:0004364,GO:0006952,GO:0005515	glutathione transferase activity|defense response|protein binding											GRMZM2G032977		Zm00001d028038	GRMZM2G029055	GRMZM2G029000
Zm00001d019225	GRMZM2G173967	427.997	175.319	680.674	3.88248	4.66931e-13	1.60054e-10	Up	2.99022	9.67196	3.68111	20.9668	21.134	22.0378		GO:0016021,GO:0015175,GO:0015173	integral component of membrane|neutral amino acid transmembrane transporter activity|aromatic amino acid transmembrane transporter activity											GRMZM5G852779		Zm00001d028039	GRMZM2G111191	GRMZM2G029055
Zm00001d041077	#N/A	107.801	44.2117	171.39	3.87658	5.35098e-07	4.79087e-05	Up	2.52483	4.30202	5.67605	22.6825	11.9014	13.2466		GO:0051539,GO:0009435,GO:0008987	4 iron, 4 sulfur cluster binding|NAD biosynthetic process|quinolinate synthetase A activity											#N/A		Zm00001d028040	GRMZM2G111214	GRMZM2G111191
Zm00001d029263	GRMZM2G073401	22.0163	9.03795	34.9947	3.87197	0.00103586	0.0245608	Up	0.392055	0.499312	0.777216	3.31262	1.86968	1.27452		GO:0005737,GO:0006457	cytoplasm|protein folding											GRMZM2G136508		Zm00001d028042	GRMZM2G411079	GRMZM2G111214
Zm00001d003059	GRMZM2G147268	443.254	182.253	704.256	3.86417	5.91127e-15	2.60518e-12	Up	2.0145	2.74011	1.61056	7.85673	8.58068	7.559		GO:0016829,GO:0006520,GO:0003824	lyase activity|cellular amino acid metabolic process|catalytic activity											GRMZM2G438007		Zm00001d028043	GRMZM2G411084	GRMZM2G411079
Zm00001d033241	GRMZM2G092391	55.5605	22.8702	88.2507	3.85877	0.00443351	0.0699809	Up	1.3093	0.228438	1.67604	6.91209	2.6747	3.87808		GO:0016021,GO:0016020,GO:0003333,GO:0015171,GO:0005886	integral component of membrane|membrane|amino acid transmembrane transport|amino acid transmembrane transporter activity|plasma membrane											GRMZM2G081458		Zm00001d028045	GRMZM2G064841	GRMZM2G411084
Zm00001d043610	GRMZM2G468111	8.47258	3.48855	13.4566	3.85736	0.0332585	0.270391	Up	0.5238	0	0	0.958365	3.55952	2.1008														#N/A		Zm00001d028046	GRMZM2G464510	GRMZM2G064841
Zm00001d049678	GRMZM2G069047	7.86814	3.24015	12.4961	3.85666	0.0407403	0.30514	Up	0.11256	0	0.0667158	0.133692	0.391702	0.349054		GO:0003677,GO:0006351,GO:0006355,GO:0005634	DNA binding|transcription, DNA-templated|regulation of transcription, DNA-templated|nucleus											#N/A		Zm00001d028047	GRMZM2G464515	GRMZM2G464510
Zm00001d038437	GRMZM2G047762	7.90657	3.27055	12.5426	3.835	0.0459414	0.326221	Up	0	0.399097	0.354266	1.4862	0.79414	0.54879		GO:0016021,GO:0016020,GO:0055085,GO:0030001,GO:0046873,GO:0005385,GO:0071577	integral component of membrane|membrane|transmembrane transport|metal ion transport|metal ion transmembrane transporter activity|zinc ion transmembrane transporter activity|zinc II ion transmembrane transport											GRMZM2G061806		na	GRMZM2G581425	GRMZM2G464515
Zm00001d017420	GRMZM2G169580	14.4235	5.97055	22.8765	3.83156	0.00506865	0.0765675	Up	0.124825	0.137599	0.031761	0.566408	0.166748	0.312152		GO:0003677	DNA binding											GRMZM2G154007		Zm00001d028050	GRMZM5G896834	GRMZM2G581425
Zm00001d012627	GRMZM5G852779	59.7943	24.7613	94.8274	3.82967	7.80391e-07	6.59142e-05	Up	0.811733	1.19952	0.91443	4.4158	3.72496	3.53415		GO:0046872,GO:0003824	metal ion binding|catalytic activity											GRMZM2G122654		Zm00001d028051	GRMZM5G833323	GRMZM5G896834
Zm00001d006158	GRMZM2G037685	1071.22	444.664	1697.78	3.81813	0.000115397	0.00466376	Up	22.8479	30.7914	18.7341	60.6953	109.758	103.639														GRMZM2G328785		Zm00001d028053	GRMZM2G004259	GRMZM5G833323
Zm00001d013468	GRMZM2G090435	54.3695	22.5995	86.1396	3.81157	2.68525e-06	0.00019166	Up	0.717655	0.484821	0.943081	2.44368	2.99282	1.99841														#N/A		Zm00001d028054	GRMZM2G004397	GRMZM2G004259
Zm00001d021692	GRMZM2G431018	75.486	31.3927	119.579	3.80913	1.08187e-07	1.20635e-05	Up	0.459978	0.171777	0.584414	2.37627	1.44927	1.41033		GO:0005524,GO:0004672,GO:0006468,GO:0016021	ATP binding|protein kinase activity|protein phosphorylation|integral component of membrane											GRMZM2G127846		Zm00001d028055	GRMZM2G004422	GRMZM2G004397
Zm00001d019078	GRMZM2G028129	493.934	206.467	781.401	3.78462	1.81995e-13	6.56246e-11	Up	4.5206	5.04153	6.86721	28.0824	18.454	18.7714		GO:0016021,GO:0005524	integral component of membrane|ATP binding											#N/A		Zm00001d028056	GRMZM2G004523	GRMZM2G004422
Zm00001d017019	GRMZM2G160710	90.4685	37.8323	143.105	3.7826	0.00879614	0.111877	Up	1.99753	0.891769	5.55206	14.4968	12.5381	4.92423														GRMZM2G079436		Zm00001d028056	GRMZM2G114055	GRMZM2G004523
Zm00001d040310	GRMZM2G132913	27.0729	11.3601	42.7856	3.76629	0.000374334	0.0116518	Up	0.416567	0.0798593	0.718633	1.93529	1.20067	1.80643		GO:0005515	protein binding											GRMZM2G178209		Zm00001d028059	GRMZM2G307084	GRMZM2G114055
Zm00001d034514	GRMZM2G151249	89.5723	37.5873	141.557	3.7661	0.0266857	0.233216	Up	6.07698	1.5869	2.59158	17.9382	5.56349	8.72183		GO:0005576,GO:0030145,GO:0045735	extracellular region|manganese ion binding|nutrient reservoir activity											GRMZM2G101268		Zm00001d028063	GRMZM2G086604	GRMZM2G307084
Zm00001d032464	GRMZM2G105770	29.3134	12.3085	46.3184	3.76312	0.000228547	0.00796185	Up	0.0335926	0.0253877	0.0565466	0.217922	0.0739041	0.120898		GO:0005524,GO:0008270,GO:0003777,GO:0007018,GO:0008017,GO:0005515	ATP binding|zinc ion binding|microtubule motor activity|microtubule-based movement|microtubule binding|protein binding											GRMZM2G101287		Zm00001d028064	GRMZM2G162535	GRMZM2G086604
Zm00001d012885	GRMZM2G134219	192.188	80.7745	303.602	3.75864	2.66192e-11	6.59896e-09	Up	9.16775	9.7848	6.46479	44.6679	27.7526	29.5845														GRMZM2G334514		Zm00001d028066	AC200038.4_FG011	GRMZM2G162535
Zm00001d041298	GRMZM2G456669	28.4166	11.9635	44.8697	3.75055	0.000373089	0.011626	Up	0.0561187	0.127982	0.175873	0.404988	0.33224	0.614346		GO:0016021,GO:0005524,GO:0004672,GO:0004674,GO:0006468,GO:0005515	integral component of membrane|ATP binding|protein kinase activity|protein serine/threonine kinase activity|protein phosphorylation|protein binding											GRMZM2G162266		Zm00001d028066	GRMZM2G703514	AC200038.4_FG011
Zm00001d022560	GRMZM2G017961	171.743	72.6844	270.801	3.72571	0.00101032	0.0242032	Up	0.519047	0.398973	0.66184	3.14417	1.24954	1.36105		GO:0005524,GO:0004252,GO:0006508,GO:0030163,GO:0004176,GO:0006515,GO:0043565,GO:0005759,GO:0034599,GO:0051131,GO:0070407,GO:0090296	ATP binding|serine-type endopeptidase activity|proteolysis|protein catabolic process|ATP-dependent peptidase activity|misfolded or incompletely synthesized protein catabolic process|sequence-specific DNA binding|mitochondrial matrix|cellular response to oxidative stress|chaperone-mediated protein complex assembly|oxidation-dependent protein catabolic process|regulation of mitochondrial DNA replic…											AC202439.3_FG006		Zm00001d028068	GRMZM2G461907	GRMZM2G703514
Zm00001d016664	GRMZM2G172230	1485.36	629.238	2341.48	3.72113	8.58764e-05	0.00361986	Up	6.24716	10.4866	8.08132	46.3672	22.0896	23.9184		GO:0005524,GO:0019538	ATP binding|protein metabolic process											GRMZM2G062600		Zm00001d028069	GRMZM2G461905	GRMZM2G461907
Zm00001d007329	GRMZM2G106560	22.2002	9.40583	34.9945	3.72051	0.00953668	0.118898	Up	0.642902	0.260797	0.387624	2.75583	1.36687	1.05331		GO:0006355,GO:0003700,GO:0043565	regulation of transcription, DNA-templated|transcription factor activity, sequence-specific DNA binding|sequence-specific DNA binding											AC205562.3_FG002		Zm00001d028070	GRMZM2G415251	GRMZM2G461905
Zm00001d031267	GRMZM2G048616	1100.87	466.608	1735.13	3.71861	4.7909e-16	2.5098e-13	Up	8.50737	10.862	11.6798	39.8888	44.0781	32.921		GO:0003824,GO:0005829,GO:0055114,GO:0018580	catalytic activity|cytosol|oxidation-reduction process|nitronate monooxygenase activity											GRMZM2G059740		Zm00001d028071	GRMZM2G114234	GRMZM2G415251
Zm00001d050132	GRMZM2G438007	155.792	66.5824	245.001	3.67967	1.92523e-05	0.00105432	Up	0.861807	0.73237	0.744452	4.37761	2.3704	2.43077		GO:0016021,GO:0005524,GO:0004672,GO:0004674,GO:0006468,GO:0005515	integral component of membrane|ATP binding|protein kinase activity|protein serine/threonine kinase activity|protein phosphorylation|protein binding											GRMZM2G300692		Zm00001d028072	GRMZM2G114232	GRMZM2G114234
Zm00001d011515	GRMZM2G049378	6330.87	2705.75	9956	3.67957	0.00543986	0.0805034	Up	80.5973	126.025	51.5529	201.103	459.112	270.803		GO:0003677	DNA binding											GRMZM2G333274		Zm00001d028073	GRMZM2G114190	GRMZM2G114232
Zm00001d014025	GRMZM2G138744	25.2535	10.8089	39.6981	3.67274	0.000757789	0.0198117	Up	0.091334	0.115317	0.140551	0.37498	0.532024	0.448818		GO:0004061,GO:0019441	arylformamidase activity|tryptophan catabolic process to kynurenine											GRMZM2G102550		Zm00001d028074	GRMZM2G114184	GRMZM2G114190
Zm00001d010725	GRMZM2G160325	52.6362	22.5295	82.7429	3.67265	0.00036209	0.011347	Up	0.230678	0.133951	0.329216	1.24404	0.734873	0.656286														GRMZM2G306094		Zm00001d028075	GRMZM2G110847	GRMZM2G114184
Zm00001d043795	GRMZM2G056388	223.334	95.8163	350.851	3.66171	1.97108e-10	4.20977e-08	Up	7.01249	7.04015	2.58269	18.0949	23.5085	21.0293		GO:0005515	protein binding											GRMZM2G466563		Zm00001d028077	GRMZM2G411216	GRMZM2G110847
Zm00001d019725	GRMZM2G027198	12.3744	5.32578	19.423	3.64698	0.018428	0.18385	Up	0.187056	0.71429	0.655589	1.1376	2.42576	2.06188		GO:0009055	electron carrier activity											GRMZM2G050536		Zm00001d028084	GRMZM2G388915	GRMZM2G411216
Zm00001d020985	GRMZM2G340139	10.1943	4.39106	15.9975	3.64319	0.0271455	0.235529	Up	0.020104	0.0474103	0.0373314	0.166265	0.119212	0.094418		GO:0046872,GO:0016021,GO:0005524,GO:0000166,GO:0016020,GO:0005388,GO:0070588,GO:0005516	metal ion binding|integral component of membrane|ATP binding|nucleotide binding|membrane|calcium-transporting ATPase activity|calcium ion transmembrane transport|calmodulin binding											GRMZM5G862799		Zm00001d028085	GRMZM2G346750	GRMZM2G388915
Zm00001d052122	GRMZM2G139293	27.5098	11.8513	43.1683	3.64249	0.029151	0.247181	Up	0.877661	0	1.56515	3.95633	0.834155	2.56857		GO:0016021	integral component of membrane											AC210168.4_FG003		Zm00001d028086	GRMZM5G895573	GRMZM2G346750
Zm00001d025979	GRMZM2G386430	22.4748	9.68272	35.2669	3.64225	0.00137839	0.0301585	Up	0.0566653	0.0535974	0.0411198	0.132092	0.184237	0.232347		GO:0003723,GO:0005515,GO:0005488	RNA binding|protein binding|binding											GRMZM2G074743		Zm00001d028088	GRMZM5G880508	GRMZM5G895573
Zm00001d005811	GRMZM2G100372	24.1059	10.4032	37.8087	3.63435	0.000825552	0.0210364	Up	0.277526	0.132086	0.349726	0.978957	0.399018	1.33888														GRMZM2G139293		Zm00001d028089	GRMZM5G872264	GRMZM5G880508
Zm00001d052245	AC185466.3_FG001	132.034	56.9858	207.082	3.63392	6.84027e-06	0.000436598	Up	0.178201	0.315697	0.216588	1.24494	0.638903	0.733822		GO:0000145,GO:0006887	exocyst|exocytosis											GRMZM2G018716		Zm00001d028091	GRMZM2G107395	GRMZM5G872264
Zm00001d048907	GRMZM2G456471	232.621	100.519	364.722	3.62837	3.90044e-05	0.00191438	Up	1.36788	1.66496	2.89396	11.4394	6.13201	4.40832		GO:0005975,GO:0008270,GO:0009298,GO:0004476	carbohydrate metabolic process|zinc ion binding|GDP-mannose biosynthetic process|mannose-6-phosphate isomerase activity											GRMZM2G021589		na	GRMZM2G107440	GRMZM2G107395
Zm00001d003356	GRMZM2G119975	475.778	205.678	745.877	3.62644	0.00112128	0.0260085	Up	10.2976	4.9839	12.3784	51.477	20.4042	26.9578														GRMZM2G174128		Zm00001d028092	GRMZM2G007130	GRMZM2G107440
Zm00001d017247	GRMZM2G094602	17.3904	7.51916	27.2617	3.62564	0.010593	0.127433	Up	0.0508459	0.080938	0.234074	0.717121	0.330572	0.271685		GO:0008270,GO:0005515	zinc ion binding|protein binding											GRMZM2G013115		Zm00001d028093	GRMZM2G006977	GRMZM2G007130
Zm00001d018006	GRMZM2G116185	35.8594	15.5178	56.201	3.62172	0.0404857	0.304081	Up	0.0635342	0.122374	0.793451	0.929598	1.91469	0.79671														GRMZM2G089106		Zm00001d028094	GRMZM2G077127	GRMZM2G006977
Zm00001d031398	GRMZM2G391288	36.0332	15.6111	56.4553	3.61635	0.000211828	0.00756938	Up	0.303007	0.100957	0.216238	1.29052	0.550862	0.668194		GO:0016021,GO:0005524,GO:0004672,GO:0004674,GO:0048544,GO:0006468	integral component of membrane|ATP binding|protein kinase activity|protein serine/threonine kinase activity|recognition of pollen|protein phosphorylation											GRMZM2G022686		Zm00001d028096	GRMZM2G457178	GRMZM2G077127
Zm00001d044092	GRMZM2G032244	46.9829	20.367	73.5987	3.61363	0.000936343	0.0230067	Up	0.644768	1.2689	0	4.59284	5.40522	4.22364		GO:0005737,GO:0006364,GO:0008173	cytoplasm|rRNA processing|RNA methyltransferase activity											GRMZM2G414503		Zm00001d028097	GRMZM2G457201	GRMZM2G457178
Zm00001d041326	GRMZM2G480380	8.25924	3.58145	12.937	3.61224	0.0384958	0.294135	Up	0.264371	0	0.078815	0.578958	0.205119	0.477661														GRMZM2G003506		Zm00001d028098	GRMZM2G119104	GRMZM2G457201
Zm00001d051157	GRMZM2G135132	124.559	54.0264	195.091	3.61104	0.0073106	0.0983901	Up	1.39824	1.14814	2.3617	9.58575	3.74581	3.94186		GO:0016773,GO:0004001,GO:0006166	phosphotransferase activity, alcohol group as acceptor|adenosine kinase activity|purine ribonucleoside salvage											GRMZM2G449447		Zm00001d028099	AC177837.3_FG002	GRMZM2G119104
Zm00001d017276	GRMZM2G334660	133.077	57.7456	208.409	3.60909	0.00908254	0.114522	Up	0.565352	1.47649	3.25419	7.17174	7.6701	4.03336		GO:0005737,GO:0003824,GO:0006559,GO:0045548,GO:0009800,GO:0016841	cytoplasm|catalytic activity|L-phenylalanine catabolic process|phenylalanine ammonia-lyase activity|cinnamic acid biosynthetic process|ammonia-lyase activity											GRMZM2G012465		Zm00001d028102	GRMZM2G055025	AC177837.3_FG002
Zm00001d017288	GRMZM2G154628	47.9743	20.8459	75.1026	3.60274	0.0122196	0.140421	Up	0.832564	0.997542	1.43825	8.04574	3.09584	3.02766	Aquaporin PIP2-4 [Source:Uniprot/SWISSPROT;Acc:Q9ATM6]	GO:0006810,GO:0016020,GO:0005215,GO:0016021	transport|membrane|transporter activity|integral component of membrane											#N/A		Zm00001d028103	GRMZM2G055101	GRMZM2G055025
Zm00001d037515	GRMZM2G122577	12.0441	5.24402	18.8442	3.59347	0.0196324	0.192249	Up	0.208611	0.197404	0.175596	1.09799	0.787389	0.587704														GRMZM2G114850		Zm00001d028104	GRMZM2G055172	GRMZM2G055101
Zm00001d029699	GRMZM2G025190	30.4618	13.3119	47.6118	3.57662	0.0401628	0.302655	Up	0.634952	1.59586	0.621027	6.42667	1.78395	2.51318		GO:0016740,GO:0005515	transferase activity|protein binding											GRMZM2G180080		Zm00001d028105	GRMZM2G055217	GRMZM2G055172
Zm00001d018738	GRMZM2G465226	1036.97	454.225	1619.71	3.56588	0.0169938	0.174044	Up	80.9342	45.37	44.2052	386.909	134.175	146.654		GO:0005576	extracellular region											#N/A		Zm00001d028107	GRMZM2G055282	GRMZM2G055217
Zm00001d021073	GRMZM5G817559	29.8773	13.1012	46.6534	3.56099	0.00484986	0.0743548	Up	0.291273	0.157018	0.0989306	0.919767	0.503705	0.40721		GO:0016747	transferase activity, transferring acyl groups other than amino-acyl groups											#N/A		Zm00001d028109	GRMZM2G007486	GRMZM2G055282
Zm00001d008764	GRMZM2G457929	1549.49	681.138	2417.84	3.54971	0.000239856	0.00828882	Up	24.9488	22.5754	15.1734	55.5217	96.4822	67.291		GO:0008152,GO:0016758	metabolic process|transferase activity, transferring hexosyl groups											AC234171.1_FG001		Zm00001d028110	GRMZM2G307529	GRMZM2G007486
Zm00001d033132	GRMZM2G414192	1432.18	631.555	2232.81	3.53541	0.000141402	0.00547564	Up	4.04049	2.4428	3.62488	3.29688	3.49565	3.59839		GO:0016020,GO:0009765,GO:0046872,GO:0018298,GO:0016168,GO:0009535,GO:0009523,GO:0016021,GO:0009522	membrane|photosynthesis, light harvesting|metal ion binding|protein-chromophore linkage|chlorophyll binding|chloroplast thylakoid membrane|photosystem II|integral component of membrane|photosystem I											GRMZM2G179768		Zm00001d028111	GRMZM2G007347	GRMZM2G307529
Zm00001d039454	GRMZM2G143165	129.452	57.1006	201.803	3.53418	4.60834e-09	7.57104e-07	Up	1.13956	1.70662	2.16829	7.73457	5.45401	5.11836		GO:0003824,GO:0008152	catalytic activity|metabolic process											GRMZM2G005066		Zm00001d028112	GRMZM2G007188	GRMZM2G007347
Zm00001d047252	GRMZM2G314769	574.993	253.836	896.149	3.53042	0.00123922	0.0279052	Up	14.9908	12.2496	20.1726	96.9036	46.6706	40.9791		GO:0030246	carbohydrate binding											GRMZM2G087740		Zm00001d028113	GRMZM2G015067	GRMZM2G007188
Zm00001d042241	#N/A	34.6989	15.3307	54.0672	3.52674	0.03044	0.254339	Up	0.440739	0.974593	0.919232	5.2865	1.9675	1.48993		GO:0005524,GO:0009229,GO:0004788,GO:0006772,GO:0030975	ATP binding|thiamine diphosphate biosynthetic process|thiamine diphosphokinase activity|thiamine metabolic process|thiamine binding											GRMZM2G345039		Zm00001d028114	GRMZM2G015219	GRMZM2G015067
Zm00001d038284	GRMZM2G430871	343.38	151.796	534.964	3.52422	0.00261416	0.0475636	Up	7.76018	18.8307	13.0013	37.1297	63.5557	32.6658														GRMZM2G166383		Zm00001d028116	GRMZM2G312226	GRMZM2G015219
Zm00001d003584	GRMZM2G087192	1515.36	670.458	2360.26	3.52037	6.92189e-16	3.37169e-13	Up	14.6538	12.859	8.00844	46.0707	45.8632	37.914		GO:0016491,GO:0003824,GO:0010181,GO:0055114	oxidoreductase activity|catalytic activity|FMN binding|oxidation-reduction process											GRMZM2G005633		Zm00001d028117	GRMZM5G863656	GRMZM2G312226
Zm00001d049673	#N/A	14.3396	6.34956	22.3297	3.51673	0.00898722	0.113837	Up	1.76777	0	0	2.7958	1.90632	1.77993														GRMZM2G023013		Zm00001d028118	GRMZM2G140674	GRMZM5G863656
Zm00001d012648	GRMZM2G111428	24.4875	10.8448	38.1302	3.516	0.00100282	0.0241098	Up	0.615099	0.325403	0.813758	2.83464	2.06528	1.47806		GO:0016021,GO:0016020,GO:0008375	integral component of membrane|membrane|acetylglucosaminyltransferase activity											GRMZM2G117956		Zm00001d028119	GRMZM2G440363	GRMZM2G140674
Zm00001d008468	GRMZM2G333022	298.637	132.571	464.702	3.5053	8.33061e-05	0.0035259	Up	2.56639	1.74628	1.86286	10.7316	5.14772	5.66361		GO:0005524,GO:0004672,GO:0006468	ATP binding|protein kinase activity|protein phosphorylation											#N/A		Zm00001d028120	GRMZM2G380789	GRMZM2G440363
Zm00001d025035	GRMZM2G017164	250.76	111.355	390.165	3.50378	0.00732819	0.098579	Up	1.53224	1.52393	1.81694	10.0857	3.46412	4.0629		GO:0005524,GO:0004672,GO:0030246,GO:0004674,GO:0006468	ATP binding|protein kinase activity|carbohydrate binding|protein serine/threonine kinase activity|protein phosphorylation											GRMZM2G157675		Zm00001d028122	GRMZM2G127635	GRMZM2G380789
Zm00001d021901	GRMZM2G374971	27.0773	12.0533	42.1013	3.49294	0.022722	0.210152	Up	0	1.20166	0	2.65087	1.49748	1.48096	Zeamatin [Source:Uniprot/SWISSPROT;Acc:P33679]													GRMZM2G321839		Zm00001d028125	GRMZM2G035217	GRMZM2G127635
Zm00001d033503	AC177897.2_FG002	28.4488	12.6646	44.2329	3.49263	0.000565242	0.0159168	Up	0.109871	0.0573038	0.215233	0.518472	0.38257	0.302745		GO:0008270,GO:0005515	zinc ion binding|protein binding											GRMZM2G057006		Zm00001d028128	GRMZM2G005844	GRMZM2G035217
Zm00001d015616	GRMZM5G815077	36.9672	16.4605	57.474	3.49163	0.0111745	0.132159	Up	0.156663	0.301362	0.542022	1.9308	0.68318	1.07106		GO:0000145,GO:0006887	exocyst|exocytosis											GRMZM2G088819		Zm00001d028129	GRMZM2G005624	GRMZM2G005844
Zm00001d006297	GRMZM2G117865	45.7569	20.385	71.1287	3.48926	0.00272843	0.0489688	Up	0.437608	0.19948	0.457236	2.00862	0.874927	0.914974		GO:0005524,GO:0004672,GO:0004674,GO:0048544,GO:0006468	ATP binding|protein kinase activity|protein serine/threonine kinase activity|recognition of pollen|protein phosphorylation											GRMZM2G067402		Zm00001d028130	GRMZM2G005435	GRMZM2G005624
Zm00001d025814	GRMZM2G414503	55.1395	24.6286	85.6505	3.47768	5.57207e-06	0.00036402	Up	1.31021	0.925526	0.701312	3.8748	4.04673	4.26985		GO:0016021,GO:0006486,GO:0005794,GO:0008373	integral component of membrane|protein glycosylation|Golgi apparatus|sialyltransferase activity											GRMZM2G346133		Zm00001d028131	GRMZM2G304818	GRMZM2G005435
Zm00001d053394	GRMZM2G474119	1339.21	599.348	2079.06	3.46887	6.70643e-10	1.28417e-07	Up	21.5756	25.8828	33.5443	118.597	83.2155	72.2624														GRMZM2G035517		Zm00001d028132	GRMZM2G304809	GRMZM2G304818
Zm00001d045651	#N/A	20.1693	9.02861	31.3101	3.46787	0.0273441	0.236688	Up	1.96274	0.962043	1.74121	12.1949	3.07784	4.02561														GRMZM2G702159		Zm00001d028134	AC186653.4_FG005	GRMZM2G304809
Zm00001d014903	GRMZM5G889467	58.317	26.1146	90.5195	3.46624	0.000161869	0.00606519	Up	0.403478	0.207518	0.278802	1.42868	0.478485	0.776784		GO:0006629,GO:0007165,GO:0008081,GO:0035556,GO:0004435,GO:0005515,GO:0005622,GO:0016042,GO:0004871	lipid metabolic process|signal transduction|phosphoric diester hydrolase activity|intracellular signal transduction|phosphatidylinositol phospholipase C activity|protein binding|intracellular|lipid catabolic process|signal transducer activity											GRMZM2G102959		Zm00001d028137	GRMZM2G002498	AC186653.4_FG005
Zm00001d005018	GRMZM2G079127	1197.11	536.151	1858.06	3.46555	8.16543e-15	3.47979e-12	Up	7.33484	11.745	9.80394	33.8823	35.1245	33.2256		GO:0016021,GO:0016020,GO:0055085,GO:0015238,GO:0015297,GO:0006855	integral component of membrane|membrane|transmembrane transport|drug transmembrane transporter activity|antiporter activity|drug transmembrane transport											GRMZM2G072029		Zm00001d028138	GRMZM2G471253	GRMZM2G002498
Zm00001d042056	GRMZM2G426046	15.0208	6.73803	23.3035	3.4585	0.0277156	0.238774	Up	0.952511	0	0.400822	0.422784	0	0		GO:0005509	calcium ion binding											GRMZM2G109627		Zm00001d028139	GRMZM2G171073	GRMZM2G471253
Zm00001d048785	GRMZM5G845021	134.772	60.542	209.001	3.45217	1.10956e-07	1.22155e-05	Up	1.21138	1.47156	1.44377	6.78702	4.21582	4.70868		GO:0005524,GO:0000103,GO:0004020,GO:0070814	ATP binding|sulfate assimilation|adenylylsulfate kinase activity|hydrogen sulfide biosynthetic process											GRMZM2G111975		Zm00001d028140	AC205725.3_FG010	GRMZM2G171073
Zm00001d053740	GRMZM2G143457	13.5646	6.09386	21.0353	3.45189	0.0164361	0.170204	Up	0.0993969	0.477149	0.168995	0.572117	0.799369	0.89861														GRMZM2G177412		Zm00001d028143	GRMZM2G153769	AC205725.3_FG010
Zm00001d029922	GRMZM2G425719	9.89016	4.45176	15.3286	3.44326	0.0346706	0.276856	Up	0.0760206	0.183018	0.0672701	0.571749	0.1792	0.176673		GO:0016491,GO:0050660,GO:0055114,GO:0050661,GO:0004499	oxidoreductase activity|flavin adenine dinucleotide binding|oxidation-reduction process|NADP binding|N,N-dimethylaniline monooxygenase activity											AC233851.1_FG008		Zm00001d028144	GRMZM2G153920	GRMZM2G153769
Zm00001d011446	GRMZM2G179685	46.4851	20.9276	72.0427	3.44248	0.00100807	0.024191	Up	0.653874	0.315294	0.159121	2.53951	1.10704	0.932433		GO:0003824,GO:0050662	catalytic activity|coenzyme binding											AC203535.4_FG007		Zm00001d028151	GRMZM2G301885	GRMZM2G153920
Zm00001d028171	GRMZM2G071292	195.34	87.9804	302.699	3.44053	2.73217e-10	5.6611e-08	Up	1.80358	2.23335	2.20098	8.24136	8.10067	5.41936		GO:0005515	protein binding											GRMZM2G057466		Zm00001d028152	GRMZM2G002492	GRMZM2G301885
Zm00001d017822	GRMZM2G466309	12.0335	5.42239	18.6447	3.43846	0.0196727	0.192396	Up	0.243687	0.46994	0.436161	1.73426	0.234368	3.0149														GRMZM5G882364		Zm00001d028153	GRMZM2G047513	GRMZM2G002492
Zm00001d025288	#N/A	218.446	98.4789	338.414	3.43641	0.000478884	0.0140404	Up	0	0	0	0	0	0		GO:0055114,GO:0050661,GO:0006006,GO:0004345	oxidation-reduction process|NADP binding|glucose metabolic process|glucose-6-phosphate dehydrogenase activity											GRMZM2G132550		Zm00001d028154	GRMZM2G013430	GRMZM2G047513
Zm00001d028987	GRMZM2G407825	140.802	63.6533	217.951	3.42403	3.51077e-09	5.94369e-07	Up	0.631106	0.680699	0.683166	2.87164	1.82807	2.04488		GO:0016021,GO:0005524,GO:0000287,GO:0000166,GO:0004012,GO:0015914,GO:0046872	integral component of membrane|ATP binding|magnesium ion binding|nucleotide binding|phospholipid-translocating ATPase activity|phospholipid transport|metal ion binding											GRMZM2G085236		Zm00001d028159	GRMZM2G440543	GRMZM2G013430
Zm00001d046149	GRMZM5G812126	11.8309	5.35236	18.3095	3.42082	0.0209554	0.200147	Up	0.697246	0.446483	0.201973	1.02262	0.548492	1.74428		GO:0016021	integral component of membrane											GRMZM2G133407		Zm00001d028160	GRMZM2G139852	GRMZM2G440543
Zm00001d039575	GRMZM2G144668	238.32	107.958	368.681	3.41502	0.00011062	0.00451007	Up	5.17809	4.26607	7.18576	29.5517	16.9201	14.3624		GO:0046872,GO:0016491,GO:0055114	metal ion binding|oxidoreductase activity|oxidation-reduction process											GRMZM2G377780		Zm00001d028161	GRMZM2G103873	GRMZM2G139852
Zm00001d020953	GRMZM2G043254	30.0717	13.6891	46.4542	3.3935	0.000495995	0.0143751	Up	0.292796	0.620586	0.267406	1.34452	1.14789	1.38704		GO:0016021,GO:0055085	integral component of membrane|transmembrane transport											GRMZM2G058358		Zm00001d028162	GRMZM2G159632	GRMZM2G103873
Zm00001d040118	GRMZM2G180622	690.241	314.92	1065.56	3.38359	3.01612e-05	0.00154792	Up	8.08529	13.422	9.03916	23.2758	36.8405	35.7798														#N/A		Zm00001d028164	GRMZM2G042171	GRMZM2G159632
Zm00001d049213	GRMZM2G007289	16.3631	7.4757	25.2505	3.37768	0.0386869	0.294778	Up	0.448378	0	0	1.10316	0.213364	0.952565		GO:0016491,GO:0005506,GO:0006633,GO:0055114	oxidoreductase activity|iron ion binding|fatty acid biosynthetic process|oxidation-reduction process											GRMZM5G803334		Zm00001d028165	GRMZM2G119150	GRMZM2G042171
Zm00001d038325	GRMZM2G135165	341.742	156.409	527.075	3.36985	3.11163e-08	4.03712e-06	Up	7.52225	2.59504	14.9442	33.8393	25.4022	29.5138		GO:0016021	integral component of membrane											GRMZM2G037998		Zm00001d028167	GRMZM2G003506	GRMZM2G119150
Zm00001d019312	GRMZM2G172204	118.576	54.317	182.835	3.36607	0.035617	0.281739	Up	0.782955	1.73284	2.17355	9.78984	2.94206	4.29809		GO:0030246	carbohydrate binding											GRMZM2G157218		Zm00001d028169	GRMZM2G331652	GRMZM2G003506
Zm00001d038527	GRMZM2G701218	117.995	54.157	181.833	3.35752	3.0079e-06	0.000211965	Up	0.934449	1.33393	0.91051	5.18489	2.68433	2.62066		GO:0003677,GO:0006351,GO:0006355,GO:0005634	DNA binding|transcription, DNA-templated|regulation of transcription, DNA-templated|nucleus											GRMZM2G174449		Zm00001d028170	GRMZM2G331638	GRMZM2G331652
Zm00001d047728	GRMZM2G378852	27.1038	12.4695	41.7381	3.34721	0.0231338	0.212826	Up	0.716946	0.408295	0.842976	1.19286	2.77949	1.62816		GO:0005524,GO:0004672,GO:0006468	ATP binding|protein kinase activity|protein phosphorylation											GRMZM2G011598		Zm00001d028171	GRMZM2G071292	GRMZM2G331638
Zm00001d042940	GRMZM2G059134	355.908	163.839	547.977	3.3446	2.69486e-06	0.000191854	Up	5.06968	6.01903	1.04615	10.6614	14.3753	14.3676														GRMZM2G057959		Zm00001d028171	GRMZM2G071374	GRMZM2G071292
Zm00001d016166	GRMZM2G069542	1057.64	487.093	1628.19	3.34267	3.23622e-07	3.12884e-05	Up	2.44879	2.52951	2.95307	12.7725	7.54438	6.91345		GO:0015977,GO:0003824,GO:0006099,GO:0008964	carbon fixation|catalytic activity|tricarboxylic acid cycle|phosphoenolpyruvate carboxylase activity											GRMZM2G037839		Zm00001d028171	GRMZM2G153814	GRMZM2G071374
Zm00001d014717	GRMZM2G347766	119.459	55.0328	183.886	3.34139	0.000630326	0.0172084	Up	1.27218	1.88361	1.26928	6.84232	2.47171	4.39379		GO:0016021,GO:0006024,GO:0015012	integral component of membrane|glycosaminoglycan biosynthetic process|heparan sulfate proteoglycan biosynthetic process											GRMZM2G114789		Zm00001d028172	GRMZM2G071217	GRMZM2G153814
Zm00001d009115	GRMZM2G010061	48.0706	22.1782	73.963	3.33494	0.00949607	0.118506	Up	1.18821	2.45781	0	3.05789	5.90357	3.65116														GRMZM2G095865		Zm00001d028172	GRMZM2G071343	GRMZM2G071217
Zm00001d032626	GRMZM2G023013	39.1889	18.0857	60.292	3.33368	9.26729e-05	0.00386346	Up	0.343434	0.501138	0.904204	3.70009	0.992939	1.63687														GRMZM2G050748		Zm00001d028172	GRMZM2G153799	GRMZM2G071343
Zm00001d012628	#N/A	38.5781	17.8089	59.3472	3.33244	0.00913073	0.114973	Up	0.411356	0.920018	0.635017	3.77628	1.6711	1.49257		GO:0046872,GO:0003824	metal ion binding|catalytic activity											GRMZM2G017522		Zm00001d028173	GRMZM2G032423	GRMZM2G153799
Zm00001d044421	GRMZM2G157675	32.864	15.2099	50.5181	3.3214	0.000414365	0.0126288	Up	0.43167	1.72379	0.759222	3.66741	2.47272	3.38137		GO:0016021,GO:0008643	integral component of membrane|carbohydrate transport											GRMZM2G150474		Zm00001d028174	GRMZM2G023364	GRMZM2G032423
Zm00001d044302	GRMZM2G430266	23.4011	10.8354	35.9667	3.31935	0.00172748	0.0353452	Up	0.210823	0.180751	0.142569	0.630626	0.481109	0.57071														GRMZM2G056875		Zm00001d028176	GRMZM2G326869	GRMZM2G023364
Zm00001d046746	GRMZM2G037485	373.537	174.232	572.841	3.2878	0.0195344	0.191584	Up	10.4328	5.75256	13.3483	57.8184	23.0901	21.9512		GO:0016021	integral component of membrane											#N/A		Zm00001d028177	GRMZM2G376074	GRMZM2G326869
Zm00001d000237	#N/A	182.406	85.0889	279.722	3.28741	0.00439404	0.0694677	Up	3.89595	5.16082	4.94305	12.6908	22.3112	11.3408	Cis-zeatin O-glucosyltransferase 1 [Source:Uniprot/SWISSPROT;Acc:Q93XP7]	GO:0008152,GO:0016758	metabolic process|transferase activity, transferring hexosyl groups											GRMZM2G109262		Zm00001d028178	GRMZM2G077045	GRMZM2G376074
Zm00001d051318	#N/A	10.5942	4.94665	16.2418	3.28339	0.0304325	0.254339	Up	0.437372	0.188726	0.0580655	0.748609	0.723874	0.338219														GRMZM2G073401		Zm00001d028180	GRMZM2G155242	GRMZM2G077045
Zm00001d053739	GRMZM2G143460	159.184	74.5525	243.815	3.27037	8.5433e-09	1.27819e-06	Up	3.23015	2.40043	3.30214	8.06014	10.3379	9.15144		GO:0016021	integral component of membrane											GRMZM2G414192		Zm00001d028181	GRMZM2G070716	GRMZM2G155242
Zm00001d044683	GRMZM2G175076	451.541	211.665	691.416	3.26656	0.0028602	0.0506463	Up	10.1275	9.31544	27.6603	80.7135	44.2774	32.449		GO:0016872,GO:0045430,GO:0009813	intramolecular lyase activity|chalcone isomerase activity|flavonoid biosynthetic process											#N/A		Zm00001d028182	GRMZM2G070442	GRMZM2G070716
Zm00001d025043	#N/A	362.106	169.796	554.417	3.2652	8.10348e-05	0.00344553	Up	2.05176	1.13738	1.51284	7.62455	3.8537	4.14828		GO:0016021,GO:0005524,GO:0006810,GO:0055085,GO:0042626,GO:0016887	integral component of membrane|ATP binding|transport|transmembrane transport|ATPase activity, coupled to transmembrane movement of substances|ATPase activity											GRMZM2G178955		Zm00001d028183	GRMZM2G069765	GRMZM2G070442
Zm00001d040818	GRMZM2G031568	9593	4501.37	14684.6	3.26226	6.00647e-15	2.60577e-12	Up	43.9384	47.63	57.3518	196.466	147.155	126.9		GO:0016747,GO:0009507,GO:0010287,GO:0004144,GO:0033306,GO:0019432	transferase activity, transferring acyl groups other than amino-acyl groups|chloroplast|plastoglobule|diacylglycerol O-acyltransferase activity|phytol metabolic process|triglyceride biosynthetic process											GRMZM2G124815		Zm00001d028185	GRMZM2G107774	GRMZM2G069765
Zm00001d045043	GRMZM2G090980	1404.43	659.244	2149.61	3.26073	4.44612e-08	5.43817e-06	Up	10.5329	13.9966	13.0391	53.9239	40.4297	28.653		GO:0016491,GO:0008270,GO:0055114	oxidoreductase activity|zinc ion binding|oxidation-reduction process											AC209636.2_FG003		Zm00001d028186	GRMZM2G107805	GRMZM2G107774
Zm00001d026572	GRMZM2G464157	16.0918	7.55507	24.6285	3.25986	0.0423246	0.31044	Up	0.149556	0.0476139	0.439185	1.34332	0.698921	0.457865		GO:0016787	hydrolase activity											GRMZM2G030769		Zm00001d028187	GRMZM2G107815	GRMZM2G107805
Zm00001d028572	GRMZM2G160506	21.5072	10.1058	32.9086	3.25641	0.00265894	0.0481261	Up	0.307628	0.414062	0.107913	1.22475	0.782132	0.689897		GO:0009058,GO:0016779,GO:0016740	biosynthetic process|nucleotidyltransferase activity|transferase activity											AC235543.1_FG002		Zm00001d028188	GRMZM2G107854	GRMZM2G107815
Zm00001d034961	GRMZM2G160578	12.0019	5.64601	18.3578	3.25145	0.0333071	0.270391	Up	0.0133376	0.0188346	0.0313242	0.099497	0.0912364	0.0337653														GRMZM2G312069		Zm00001d028189	GRMZM2G107872	GRMZM2G107854
Zm00001d046909	GRMZM2G048472	786.483	370.003	1202.96	3.25123	1.23304e-08	1.78308e-06	Up	9.01381	9.22598	13.5346	47.7247	28.3914	29.055		GO:0016021,GO:0016765,GO:0009266,GO:0031347,GO:0006636,GO:0009915,GO:0010189,GO:0010176,GO:0071555	integral component of membrane|transferase activity, transferring alkyl or aryl (other than methyl) groups|response to temperature stimulus|regulation of defense response|unsaturated fatty acid biosynthetic process|phloem sucrose loading|vitamin E biosynthetic process|homogentisate phytyltransferase activity|cell wall organization											GRMZM2G138997		Zm00001d028191	GRMZM5G890241	GRMZM2G107872
Zm00001d005546	GRMZM2G106213	60.2092	28.3297	92.0887	3.25061	0.000186123	0.00681755	Up	0.570901	0.501701	0.388165	2.26689	1.08129	1.09079		GO:0009507,GO:0005524,GO:0009058,GO:0016779,GO:0008878,GO:0019252,GO:0005978	chloroplast|ATP binding|biosynthetic process|nucleotidyltransferase activity|glucose-1-phosphate adenylyltransferase activity|starch biosynthetic process|glycogen biosynthetic process											GRMZM2G075461		na	GRMZM2G160224	GRMZM5G890241
Zm00001d018700	GRMZM2G015654	39.0041	18.3564	59.6518	3.24965	0.0117006	0.136614	Up	0.883003	0.281474	0.669974	3.17495	1.44289	1.58429		GO:0016021,GO:0016020,GO:0042546,GO:0008107	integral component of membrane|membrane|cell wall biogenesis|galactoside 2-alpha-L-fucosyltransferase activity											GRMZM2G389557		Zm00001d028194	GRMZM2G091563	GRMZM2G160224
Zm00001d027530	GRMZM2G059428	52.0343	24.4937	79.575	3.24879	3.34049e-05	0.00168023	Up	0.867156	0.977991	0.887852	3.17111	2.57606	2.70303		GO:0003677,GO:0006351,GO:0006355,GO:0005634	DNA binding|transcription, DNA-templated|regulation of transcription, DNA-templated|nucleus											GRMZM2G354558		Zm00001d028195	GRMZM2G091543	GRMZM2G091563
Zm00001d029940	#N/A	11.4248	5.39019	17.4594	3.23911	0.0328517	0.268609	Up	0.152053	0.43055	0.772836	2.51516	1.13671	0.704287		GO:0003677,GO:0006355,GO:0003700	DNA binding|regulation of transcription, DNA-templated|transcription factor activity, sequence-specific DNA binding											GRMZM2G121189		Zm00001d028196	GRMZM2G391403	GRMZM2G091543
Zm00001d017966	GRMZM2G181505	1100.44	519.774	1681.1	3.2343	0.000155599	0.00589388	Up	2.58188	1.78391	2.16317	11.0851	4.86377	5.16883		GO:0005737,GO:0003824,GO:0055114,GO:0016627,GO:0009570,GO:0009507,GO:0006212,GO:0017113,GO:0009536	cytoplasm|catalytic activity|oxidation-reduction process|oxidoreductase activity, acting on the CH-CH group of donors|chloroplast stroma|chloroplast|uracil catabolic process|dihydropyrimidine dehydrogenase (NADP+) activity|plastid											GRMZM2G105982		Zm00001d028197	GRMZM2G091511	GRMZM2G391403
Zm00001d038456	GRMZM2G410812	84.3362	39.914	128.758	3.22589	0.00887113	0.112711	Up	0.293104	0.33656	0.485229	2.22765	1.25973	0.579069		GO:0005737,GO:0006457	cytoplasm|protein folding											GRMZM2G015654		na	GRMZM5G870116	GRMZM2G091511
Zm00001d047104	GRMZM2G026889	64.1886	30.5169	97.8603	3.20676	0.0284335	0.242761	Up	0.725305	0.669235	1.23109	5.16121	2.22877	1.47637		GO:0016021,GO:0016740	integral component of membrane|transferase activity											GRMZM2G059428		Zm00001d028199	GRMZM2G015804	GRMZM5G870116
Zm00001d047671	GRMZM2G022686	81.7229	38.9615	124.484	3.19506	7.60477e-05	0.00328377	Up	1.15708	0.972825	1.7519	3.8862	5.55575	3.43778		GO:0003677	DNA binding											GRMZM2G080843		Zm00001d028201	GRMZM2G130987	GRMZM2G015804
Zm00001d003016	GRMZM2G441347	237.791	113.521	362.062	3.18938	0.000130345	0.00516265	Up	1.79073	2.36505	3.86079	12.7822	8.24851	6.25557		GO:0005737,GO:0003824,GO:0006559,GO:0016841,GO:0045548,GO:0009800	cytoplasm|catalytic activity|L-phenylalanine catabolic process|ammonia-lyase activity|phenylalanine ammonia-lyase activity|cinnamic acid biosynthetic process											GRMZM2G370507		na	GRMZM2G571942	GRMZM2G130987
Zm00001d021779	GRMZM5G862799	65.7714	31.4138	100.129	3.18742	1.04864e-05	0.000624797	Up	0.912218	0.719961	1.4927	4.00372	4.00018	2.28984		GO:0005515	protein binding											GRMZM2G180086		Zm00001d028202	GRMZM2G103059	GRMZM2G571942
Zm00001d005790	GRMZM2G057779	41.8827	20.0326	63.7328	3.18145	0.000871152	0.0219106	Up	0.909041	0.963216	1.11017	4.89676	2.48776	2.08907		GO:0016021,GO:0016020,GO:0000139,GO:0006486,GO:0008378	integral component of membrane|membrane|Golgi membrane|protein glycosylation|galactosyltransferase activity											AC166636.1_FG008		Zm00001d028203	GRMZM2G103079	GRMZM2G103059
Zm00001d020951	GRMZM2G104299	9.84443	4.71129	14.9776	3.17908	0.0458207	0.32611	Up	0.161746	0.0516068	0.188276	1.09413	0.358366	0.355315														GRMZM2G017961		Zm00001d028204	GRMZM2G395121	GRMZM2G103079
Zm00001d038023	GRMZM2G012724	75.0539	35.992	114.116	3.17059	0.0098791	0.121962	Up	1.36368	0.851188	2.42345	7.52544	3.89261	3.10235		GO:0006355,GO:0003700,GO:0043565	regulation of transcription, DNA-templated|transcription factor activity, sequence-specific DNA binding|sequence-specific DNA binding											GRMZM2G156861		Zm00001d028205	GRMZM2G094444	GRMZM2G395121
Zm00001d011839	GRMZM2G040309	75.1862	36.0775	114.295	3.16804	6.45384e-06	0.000414794	Up	0.272005	0.583725	0.427363	1.44901	1.26862	1.28624														GRMZM2G010596		Zm00001d028207	GRMZM2G009638	GRMZM2G094444
Zm00001d025412	GRMZM2G046583	228.471	109.667	347.276	3.16665	6.77291e-10	1.28801e-07	Up	1.87225	1.82385	1.60913	6.77359	5.25853	4.47237		GO:0009435,GO:0004514,GO:0019358,GO:0004516,GO:0016763	NAD biosynthetic process|nicotinate-nucleotide diphosphorylase (carboxylating) activity|nicotinate nucleotide salvage|nicotinate phosphoribosyltransferase activity|transferase activity, transferring pentosyl groups											GRMZM2G012213		Zm00001d028207	GRMZM2G069458	GRMZM2G009638
Zm00001d032070	GRMZM2G101268	32.7965	15.7877	49.8053	3.15468	0.000688876	0.0183668	Up	1.15005	1.8404	1.37734	4.18801	6.89244	3.71111		GO:0003677,GO:0005634,GO:0000786,GO:0046982	DNA binding|nucleus|nucleosome|protein heterodimerization activity											GRMZM2G429617		Zm00001d028208	GRMZM2G079823	GRMZM2G069458
Zm00001d044975	GRMZM2G005066	38.1416	18.3812	57.902	3.15007	0.0457028	0.325582	Up	0.911196	0.291042	0.527425	3.73378	1.33153	1.42125		GO:0003677	DNA binding											GRMZM2G016605		Zm00001d028210	GRMZM2G098714	GRMZM2G079823
Zm00001d002678	GRMZM2G306032	12938.5	6236.18	19640.7	3.14948	1.70937e-14	6.87836e-12	Up	33.2273	25.5588	17.4866	84.5412	82.6343	78.7197		GO:0004252,GO:0006508,GO:0008236,GO:0070008	serine-type endopeptidase activity|proteolysis|serine-type peptidase activity|serine-type exopeptidase activity											GRMZM2G167520		Zm00001d028211	GRMZM2G098667	GRMZM2G098714
Zm00001d010422	GRMZM2G025175	290.148	139.86	440.437	3.14913	1.09943e-05	0.000648105	Up	12.1362	12.1922	11.8144	57.2073	36.5143	27.4982														GRMZM2G003789		Zm00001d028213	GRMZM2G472693	GRMZM2G098667
Zm00001d010135	#N/A	158.027	76.2702	239.784	3.14387	0.00702762	0.095648	Up	0.716177	0.550244	0.781813	3.32611	1.52353	1.26187		GO:0005737,GO:0005525,GO:0003924	cytoplasm|GTP binding|GTPase activity											GRMZM2G065157		Zm00001d028214	GRMZM2G173067	GRMZM2G472693
Zm00001d048349	GRMZM2G126812	355.95	171.895	540.004	3.14148	2.71109e-08	3.63639e-06	Up	2.98805	1.98839	1.58337	9.17253	5.79212	5.26031														GRMZM2G010061		Zm00001d028216	GRMZM2G088309	GRMZM2G173067
Zm00001d007187	GRMZM2G003409	16.4532	7.95766	24.9487	3.13518	0.0112062	0.1324	Up	0.214049	0.450178	0.0634294	1.14775	0.81394	0.406096														#N/A		na	GRMZM2G100519	GRMZM2G088309
Zm00001d043515	GRMZM2G057067	472.294	228.691	715.897	3.13042	1.91422e-11	4.78815e-09	Up	3.67015	6.86053	4.3742	17.0306	15.995	13.4184		GO:0006351,GO:0006355,GO:0005634,GO:0009734,GO:0005515	transcription, DNA-templated|regulation of transcription, DNA-templated|nucleus|auxin-activated signaling pathway|protein binding											GRMZM2G475380		Zm00001d028217	GRMZM2G032070	GRMZM2G100519
Zm00001d034601	GRMZM2G347043	4284.08	2081.55	6486.6	3.11623	9.15821e-09	1.35254e-06	Up	48.2737	97.0203	59.7543	189.036	241.245	212.741		GO:0003677,GO:0006351,GO:0006355,GO:0005634	DNA binding|transcription, DNA-templated|regulation of transcription, DNA-templated|nucleus											GRMZM2G026649		Zm00001d028217	GRMZM2G099522	GRMZM2G032070
Zm00001d021936	GRMZM2G302604	175.921	85.5201	266.323	3.11415	0.00210589	0.0409676	Up	1.81257	1.98728	3.03302	10.8644	4.5948	5.74282		GO:0016021,GO:0016020,GO:0005215,GO:0055085,GO:0022891,GO:0022857	integral component of membrane|membrane|transporter activity|transmembrane transport|substrate-specific transmembrane transporter activity|transmembrane transporter activity											GRMZM2G181605		Zm00001d028218	GRMZM2G099628	GRMZM2G099522
Zm00001d019803	#N/A	18.9144	9.21202	28.6168	3.10646	0.0108435	0.129548	Up	0	0	0	0	0	0		GO:0003735,GO:0006412,GO:0005840,GO:0005622	structural constituent of ribosome|translation|ribosome|intracellular											GRMZM2G014356		Zm00001d028219	GRMZM2G099767	GRMZM2G099628
Zm00001d041972	GRMZM2G122431	396.942	193.374	600.511	3.10544	0.0141956	0.154808	Up	0.439086	13.6123	0.557232	17.2368	14.7034	13.5864		GO:0016020,GO:0016760,GO:0030244,GO:0016021,GO:0071555	membrane|cellulose synthase (UDP-forming) activity|cellulose biosynthetic process|integral component of membrane|cell wall organization											AC233883.1_FG006		Zm00001d028220	GRMZM2G128744	GRMZM2G099767
Zm00001d043199	GRMZM2G178704	23.5024	11.463	35.5419	3.10058	0.00342716	0.057845	Up	0.430871	0.567051	0.333197	2.07522	0.960737	1.19811		GO:0043531	ADP binding											GRMZM2G060210		Zm00001d028220	GRMZM2G165622	GRMZM2G128744
Zm00001d007708	#N/A	13.2791	6.48221	20.076	3.09709	0.0222897	0.207745	Up	0.235677	0.170458	0.275782	0.470012	0.273944	0.525755		GO:0005524,GO:0004672,GO:0006468	ATP binding|protein kinase activity|protein phosphorylation											AC204515.4_FG006		Zm00001d028221	GRMZM2G128665	GRMZM2G165622
Zm00001d034385	GRMZM2G019799	22.0753	10.7841	33.3666	3.09406	0.00455674	0.0713581	Up	0.0272152	0.0605631	0.125819	0.358569	0.218334	0.12845		GO:0046872,GO:0016491,GO:0005506,GO:0009055,GO:0003824,GO:0050660,GO:0016614,GO:0051536,GO:0055114,GO:0051537	metal ion binding|oxidoreductase activity|iron ion binding|electron carrier activity|catalytic activity|flavin adenine dinucleotide binding|oxidoreductase activity, acting on CH-OH group of donors|iron-sulfur cluster binding|oxidation-reduction process|2 iron, 2 sulfur cluster binding											#N/A		Zm00001d028222	GRMZM2G178894	GRMZM2G128665
Zm00001d028720	GRMZM2G319781	193.928	95.1834	292.672	3.07482	4.90657e-09	7.87461e-07	Up	4.42921	3.09242	2.92552	12.6223	9.89981	9.63511		GO:0005622,GO:0006810	intracellular|transport											GRMZM2G115701		Zm00001d028225	GRMZM2G163043	GRMZM2G178894
Zm00001d009522	GRMZM2G345039	82.1736	40.3397	124.007	3.07408	0.0214986	0.203278	Up	0.466639	0.472224	1.10424	3.72861	1.61434	1.4123		GO:0005829,GO:0004527	cytosol|exonuclease activity											GRMZM2G091891		Zm00001d028226	GRMZM2G163116	GRMZM2G163043
Zm00001d039963	GRMZM2G126749	96.4028	47.3677	145.438	3.0704	0.0452242	0.323455	Up	0.896571	1.11688	2.39507	8.19096	2.40357	3.36451		GO:0006950,GO:0005516	response to stress|calmodulin binding											GRMZM2G407825		Zm00001d028227	GRMZM2G163129	GRMZM2G163116
Zm00001d007379	GRMZM2G056329	87.2741	42.8841	131.664	3.07023	1.72196e-06	0.000131708	Up	6.63233	2.52441	5.48025	18.4985	14.3048	14.0641		GO:0016021,GO:0005886	integral component of membrane|plasma membrane											GRMZM2G084116		Zm00001d028228	GRMZM2G163154	GRMZM2G163129
Zm00001d012575	AC194405.3_FG021	41.034	20.1639	61.904	3.07004	0.000262263	0.00880501	Up	0.23486	0.484478	0.231641	0.928447	0.882343	0.880484														AC207628.4_FG010		Zm00001d028229	AC208897.3_FG003	GRMZM2G163154
Zm00001d003226	GRMZM2G021560	36.3846	17.8832	54.886	3.06915	0.00146293	0.0313306	Up	0.589935	0.248809	0	2.61757	0.769425	1.06997														GRMZM2G140989		Zm00001d028230	AC208897.3_FG004	AC208897.3_FG003
Zm00001d004633	GRMZM2G108597	550.83	270.786	830.873	3.06837	2.00723e-05	0.00109062	Up	11.6242	10.4393	18.2321	35.3365	50.7938	38.4323		GO:0016021	integral component of membrane											GRMZM2G111428		Zm00001d028231	GRMZM5G879116	AC208897.3_FG004
Zm00001d015091	GRMZM2G029087	421.213	207.248	635.178	3.06482	0.0056728	0.08255	Up	4.46648	4.52278	5.16775	23.9966	9.76929	10.5494		GO:0016021	integral component of membrane											GRMZM2G361115		Zm00001d028232	GRMZM5G891739	GRMZM5G879116
Zm00001d002553	GRMZM2G303118	20.6481	10.1702	31.1261	3.06052	0.0318054	0.261994	Up	0.105326	0.117482	0.0356717	0.453951	0.0791223	0.230281														GRMZM2G177883		Zm00001d028233	GRMZM5G842306	GRMZM5G891739
Zm00001d040292	GRMZM2G472248	311.459	153.434	469.484	3.05985	6.25512e-10	1.2145e-07	Up	0	0	0	0	0	0		GO:0006950	response to stress											#N/A		Zm00001d028235	GRMZM2G134251	GRMZM5G842306
Zm00001d024875	GRMZM2G140448	34.9213	17.255	52.5875	3.04766	0.00046298	0.0137193	Up	0.748345	0.215172	0.261207	1.63543	1.01052	1.513		GO:0020037,GO:0005506,GO:0016705,GO:0055114	heme binding|iron ion binding|oxidoreductase activity, acting on paired donors, with incorporation or reduction of molecular oxygen|oxidation-reduction process											#N/A		Zm00001d028237	GRMZM2G157580	GRMZM2G134251
Zm00001d002999	GRMZM2G006964	125.338	62.0623	188.614	3.0391	0.00466364	0.0725416	Up	0.904839	1.34939	4.01018	9.04946	6.04835	3.89014		GO:0046872,GO:0016491,GO:0055114	metal ion binding|oxidoreductase activity|oxidation-reduction process											GRMZM5G878558		Zm00001d028238	AC197545.3_FG002	GRMZM2G157580
Zm00001d006446	GRMZM2G180283	668.341	331.114	1005.57	3.03692	0.00202283	0.0398042	Up	9.70598	7.89851	28.5515	68.2881	43.238	33.6309		GO:0008152,GO:0016758	metabolic process|transferase activity, transferring hexosyl groups											GRMZM2G110286		Zm00001d028238	GRMZM2G407287	AC197545.3_FG002
Zm00001d014530	GRMZM2G382785	107.34	53.2429	161.438	3.0321	0.0218617	0.205658	Up	0.991532	3.71458	3.15716	13.8497	5.11273	5.32883		GO:0016747	transferase activity, transferring acyl groups other than amino-acyl groups											GRMZM2G106560		Zm00001d028240	GRMZM2G164965	GRMZM2G407287
Zm00001d008209	GRMZM2G063244	210.659	104.533	316.785	3.03047	0.038614	0.294538	Up	1.89516	1.2561	3.62274	12.3865	4.46888	4.95258		GO:0006457,GO:0003755,GO:0000413	protein folding|peptidyl-prolyl cis-trans isomerase activity|protein peptidyl-prolyl isomerization											GRMZM2G113378		Zm00001d028241	GRMZM2G164974	GRMZM2G164965
Zm00001d028692	GRMZM2G043291	8462.07	4202.63	12721.5	3.02704	0.000256303	0.00870497	Up	42.2305	45.093	39.7836	98.0715	161.801	108.277		GO:0005515	protein binding											GRMZM2G087824		Zm00001d028243	GRMZM2G111324	GRMZM2G164974
Zm00001d018161	GRMZM2G102959	155.582	77.332	233.832	3.02374	0.00492353	0.0750559	Up	2.97413	1.71578	0.513872	3.58845	7.21442	5.71579		GO:0020037,GO:0016491,GO:0051536,GO:0055114	heme binding|oxidoreductase activity|iron-sulfur cluster binding|oxidation-reduction process											GRMZM2G117603		Zm00001d028244	GRMZM2G411653	GRMZM2G111324
Zm00001d024432	GRMZM2G123654	223.071	110.913	335.229	3.02245	0.00415587	0.066621	Up	2.67672	11.3884	2.00255	15.38	21.4794	13.898		GO:0016747	transferase activity, transferring acyl groups other than amino-acyl groups											GRMZM2G305264		Zm00001d028245	GRMZM2G411668	GRMZM2G411653
Zm00001d050220	GRMZM2G026184	88.9629	44.2647	133.661	3.01958	0.00135744	0.0297468	Up	1.09152	0.37157	0.601734	0.949776	2.96009	1.53253		GO:0003824,GO:0009058,GO:0030170	catalytic activity|biosynthetic process|pyridoxal phosphate binding											GRMZM2G036564		Zm00001d028247	GRMZM2G039968	GRMZM2G411668
Zm00001d037759	GRMZM2G031876	22.3215	11.1254	33.5176	3.01271	0.0058965	0.0850917	Up	0.197487	0.212148	0.330484	0.839421	0.639708	0.58142														GRMZM2G400720		Zm00001d028248	GRMZM2G040052	GRMZM2G039968
Zm00001d039674	GRMZM2G066413	1580.19	788.03	2372.35	3.01048	3.00002e-08	3.94766e-06	Up	33.4077	26.8271	30.7793	84.9612	108.871	78.6525		GO:0016021,GO:0006810,GO:0005215	integral component of membrane|transport|transporter activity											#N/A		Zm00001d028249	GRMZM2G040121	GRMZM2G040052
Zm00001d029704	GRMZM2G178079	372.502	185.812	559.192	3.00945	2.2593e-09	4.02111e-07	Up	4.8078	7.91905	2.98241	12.7547	17.2719	13.3783		GO:0005515	protein binding											GRMZM2G476597		Zm00001d028252	GRMZM2G342685	GRMZM2G040121
Zm00001d037455	GRMZM2G122198	29.7032	14.8227	44.5838	3.0078	0.0250961	0.224989	Up	0.243616	0.531424	0.291043	1.84847	0.835984	0.760785		GO:0003824,GO:0008152,GO:0006568,GO:0004640	catalytic activity|metabolic process|tryptophan metabolic process|phosphoribosylanthranilate isomerase activity											GRMZM2G493549		Zm00001d028256	GRMZM2G040561	GRMZM2G342685
Zm00001d046962	#N/A	217.896	108.75	327.042	3.00728	0.00391336	0.0638017	Up	32.6138	0.206024	84.1933	91.1509	113.433	121.226														GRMZM2G374971		Zm00001d028258	GRMZM2G040728	GRMZM2G040561
Zm00001d033012	GRMZM2G019171	356.672	178.066	535.278	3.00606	5.18144e-10	1.0203e-07	Up	3.59965	4.67983	3.87653	11.2484	13.3787	11.8583		GO:0005515	protein binding											GRMZM2G465999		Zm00001d028260	GRMZM2G050514	GRMZM2G040728
Zm00001d011133	GRMZM2G137802	52.9793	26.5198	79.4388	2.99545	0.00839042	0.108505	Up	1.58987	0.304894	2.89591	6.90767	2.35702	3.6695		GO:0006355,GO:0003700,GO:0043565	regulation of transcription, DNA-templated|transcription factor activity, sequence-specific DNA binding|sequence-specific DNA binding											GRMZM2G092797		Zm00001d028261	GRMZM2G128613	GRMZM2G050514
Zm00001d000020	GRMZM2G175401	287.547	143.972	431.122	2.99448	4.53623e-09	7.54183e-07	Up	7.72765	4.60142	6.70294	12.9869	19.826	15.044														GRMZM2G075925		Zm00001d028263	GRMZM2G024435	GRMZM2G128613
Zm00001d015956	#N/A	2387.84	1196.29	3579.4	2.99209	2.25781e-12	6.96534e-10	Up	14.5663	15.8579	15.5253	49.2939	51.5903	36.2486		GO:0003824,GO:0050662,GO:0055114,GO:0016616,GO:0003854,GO:0006694	catalytic activity|coenzyme binding|oxidation-reduction process|oxidoreductase activity, acting on the CH-OH group of donors, NAD or NADP as acceptor|3-beta-hydroxy-delta5-steroid dehydrogenase activity|steroid biosynthetic process											GRMZM2G108032		Zm00001d028264	GRMZM2G057051	GRMZM2G024435
Zm00001d003015	GRMZM2G118345	287.468	144.038	430.898	2.99155	3.90533e-08	4.9287e-06	Up	3.09819	3.8038	3.54782	12.5986	11.9708	8.20726		GO:0005737,GO:0003824,GO:0006559,GO:0045548,GO:0009800,GO:0016841	cytoplasm|catalytic activity|L-phenylalanine catabolic process|phenylalanine ammonia-lyase activity|cinnamic acid biosynthetic process|ammonia-lyase activity											GRMZM2G021560		Zm00001d028264	GRMZM2G140549	GRMZM2G057051
Zm00001d026147	GRMZM5G822829	12.5618	6.2945	18.829	2.99135	0.0326559	0.267621	Up	0.20199	0.0386992	0.107644	0.337136	0.377282	0.313727														GRMZM2G313104		Zm00001d028264	GRMZM2G140991	GRMZM2G140549
Zm00001d031254	GRMZM2G086285	459.755	230.911	688.598	2.98209	0.0095943	0.119348	Up	1.34145	1.11458	1.09369	1.75766	3.48114	4.57673														GRMZM2G126079		Zm00001d028265	GRMZM2G099797	GRMZM2G140991
Zm00001d048020	GRMZM2G067402	62.3738	31.3344	93.4131	2.98116	3.06317e-05	0.00155974	Up	1.88165	1.28291	1.33939	3.63522	4.55723	4.23666		GO:0020037,GO:0019825,GO:0005886,GO:0005829,GO:0009506,GO:0005618,GO:0046872	heme binding|oxygen binding|plasma membrane|cytosol|plasmodesma|cell wall|metal ion binding											GRMZM2G093404		Zm00001d028266	GRMZM2G397754	GRMZM2G099797
Zm00001d038924	GRMZM2G037998	37.1478	18.6754	55.6201	2.97825	0.00049816	0.0144227	Up	0.883508	0.860277	0.280251	3.44627	2.9711	2.14267		GO:0016021,GO:0016020,GO:0000139,GO:0006486,GO:0008378	integral component of membrane|membrane|Golgi membrane|protein glycosylation|galactosyltransferase activity											GRMZM2G069325		na	GRMZM2G703531	GRMZM2G397754
Zm00001d049242	GRMZM2G003970	185.642	93.3315	277.952	2.97812	0.000494195	0.0143528	Up	10.135	9.23304	12.9401	49.2078	23.5532	26.3452														GRMZM2G042548		Zm00001d028267	GRMZM2G099860	GRMZM2G703531
Zm00001d004525	GRMZM2G076394	199.772	100.509	299.036	2.97522	0.0411483	0.306624	Up	0.778191	0.821298	0.811457	4.70217	1.41002	1.69616		GO:0016021	integral component of membrane											GRMZM2G066067		Zm00001d028269	GRMZM2G118485	GRMZM2G099860
Zm00001d035136	GRMZM2G134134	1110.84	560.519	1661.17	2.96362	7.11346e-12	1.98509e-09	Up	11.775	9.50776	10.4326	34.4795	31.1057	29.4326		GO:0003735,GO:0006412,GO:0005840,GO:0005622,GO:0016491,GO:0009055,GO:0006099,GO:0051536,GO:0055114,GO:0051537,GO:0046872,GO:0051539,GO:0005743,GO:0051538,GO:0008177	structural constituent of ribosome|translation|ribosome|intracellular|oxidoreductase activity|electron carrier activity|tricarboxylic acid cycle|iron-sulfur cluster binding|oxidation-reduction process|2 iron, 2 sulfur cluster binding|metal ion binding|4 iron, 4 sulfur cluster binding|mitochondrial inner membrane|3 iron, 4 sulfur cluster binding|succinate dehydrogenase (ubiquinone) activity											GRMZM2G179685		Zm00001d028269	GRMZM2G118529	GRMZM2G118485
Zm00001d015183	GRMZM2G139689	797.672	402.584	1192.76	2.96276	1.63248e-11	4.12052e-09	Up	4.88923	4.03537	4.88409	16.7649	13.6184	13.1794		GO:0009507,GO:0008734,GO:0009435,GO:0044318,GO:0016491,GO:0005737,GO:0055114	chloroplast|L-aspartate oxidase activity|NAD biosynthetic process|L-aspartate:fumarate oxidoreductase activity|oxidoreductase activity|cytoplasm|oxidation-reduction process											GRMZM2G130389		Zm00001d028270	GRMZM2G417905	GRMZM2G118529
Zm00001d006153	GRMZM2G079109	1116.43	563.723	1669.13	2.96091	4.37901e-08	5.4037e-06	Up	1.86409	1.89649	2.36051	5.94345	7.5823	5.46657		GO:0003824,GO:0016787,GO:0055088,GO:0004623,GO:0055089,GO:0055091,GO:0070328,GO:0042171,GO:0016298	catalytic activity|hydrolase activity|lipid homeostasis|phospholipase A2 activity|fatty acid homeostasis|phospholipid homeostasis|triglyceride homeostasis|lysophosphatidic acid acyltransferase activity|lipase activity											GRMZM2G170552		Zm00001d028272	GRMZM2G025123	GRMZM2G417905
Zm00001d005936	GRMZM2G015753	15.423	7.817	23.029	2.94602	0.0459609	0.326221	Up	0.795178	0	0.166136	1.1113	0.369399	0.182364		GO:0016021,GO:0008270,GO:0005515	integral component of membrane|zinc ion binding|protein binding											GRMZM2G129058		Zm00001d028273	GRMZM2G344388	GRMZM2G025123
Zm00001d040777	GRMZM2G126975	111.694	56.6992	166.689	2.93989	0.0176783	0.178681	Up	1.75644	1.22911	3.58783	10.5733	4.47983	4.26108		GO:0016021	integral component of membrane											GRMZM2G318033		Zm00001d028274	GRMZM2G344416	GRMZM2G344388
Zm00001d010743	GRMZM2G096115	32.8474	16.6828	49.0119	2.93787	0.00117436	0.0268363	Up	0.422368	0.645347	0.444221	2.02414	1.20631	1.63937		GO:0005524,GO:0004672,GO:0004674,GO:0007165,GO:0006468	ATP binding|protein kinase activity|protein serine/threonine kinase activity|signal transduction|protein phosphorylation											GRMZM2G015844		Zm00001d028275	GRMZM2G040828	GRMZM2G344416
Zm00001d043705	GRMZM2G159948	16.851	8.5585	25.1435	2.93784	0.0193655	0.190803	Up	0.0489502	0.0594307	0.00652181	0.0798686	0.0769357	0.167373		GO:0003677,GO:0006355,GO:0003713,GO:0016787	DNA binding|regulation of transcription, DNA-templated|transcription coactivator activity|hydrolase activity											#N/A		Zm00001d028278	GRMZM2G036257	GRMZM2G040828
Zm00001d042835	#N/A	48.4989	24.6513	72.3466	2.9348	0.0302971	0.253679	Up	4.84261	0	0	4.23578	4.32597	4.31206		GO:0016021,GO:0005524,GO:0004672,GO:0004713,GO:0006468	integral component of membrane|ATP binding|protein kinase activity|protein tyrosine kinase activity|protein phosphorylation											#N/A		Zm00001d028279	GRMZM2G103579	GRMZM2G036257
Zm00001d014843	GRMZM2G389557	32.3531	16.4853	48.2209	2.92509	0.00373592	0.061703	Up	0.255037	1.20959	0.547807	3.24198	0.844894	1.07465		GO:0003677,GO:0006351,GO:0006355,GO:0005634	DNA binding|transcription, DNA-templated|regulation of transcription, DNA-templated|nucleus											GRMZM2G026930		Zm00001d028280	GRMZM2G433579	GRMZM2G103579
Zm00001d014250	AC197764.4_FG003	12.357	6.29641	18.4175	2.92508	0.0391155	0.296733	Up	0.245759	0.705646	0.430502	2.15155	0.811954	0.921969														GRMZM2G013079		Zm00001d028282	GRMZM2G002178	GRMZM2G433579
Zm00001d040291	GRMZM2G472231	315.054	160.549	469.559	2.92471	1.74684e-09	3.17001e-07	Up	9.27483	15.3554	13.0886	45.395	32.708	31.943		GO:0031514,GO:0030286,GO:0007017,GO:0005875	motile cilium|dynein complex|microtubule-based process|microtubule associated complex											GRMZM2G143669		Zm00001d028285	GRMZM2G153611	GRMZM2G002178
Zm00001d014804	GRMZM2G168115	185.109	94.3771	275.841	2.92276	0.00828062	0.107485	Up	3.77278	2.00153	5.00312	17.458	7.21306	8.56902		GO:0006508,GO:0004190	proteolysis|aspartic-type endopeptidase activity											GRMZM2G107065		Zm00001d028286	GRMZM2G180023	GRMZM2G153611
Zm00001d019376	GRMZM2G326250	116.496	59.4066	173.586	2.92199	0.0156463	0.164928	Up	0.266549	0.649789	0.190018	0.957108	0.81274	1.5853		GO:0046872,GO:0016491,GO:0003824,GO:0050660,GO:0016614,GO:0055114,GO:0005506,GO:0009055,GO:0051537,GO:0051536	metal ion binding|oxidoreductase activity|catalytic activity|flavin adenine dinucleotide binding|oxidoreductase activity, acting on CH-OH group of donors|oxidation-reduction process|iron ion binding|electron carrier activity|2 iron, 2 sulfur cluster binding|iron-sulfur cluster binding											GRMZM2G016890		Zm00001d028287	GRMZM2G180044	GRMZM2G180023
Zm00001d002884	GRMZM2G434557	51.6768	26.3952	76.9583	2.91562	0.000138514	0.00539389	Up	0.956033	0.355839	0.31908	1.83054	1.97903	0.525494		GO:0016021	integral component of membrane											GRMZM2G090435		Zm00001d028288	GRMZM2G480698	GRMZM2G180044
Zm00001d037784	GRMZM2G031311	656.756	335.545	977.967	2.91456	4.02049e-06	0.000270288	Up	2.81327	3.1182	6.35535	15.7329	10.8341	8.61424		GO:0003824,GO:0050662	catalytic activity|coenzyme binding											GRMZM2G388892		Zm00001d028291	GRMZM2G447504	GRMZM2G480698
Zm00001d043968	GRMZM2G121753	6397.23	3270.29	9524.16	2.91232	0.0137543	0.151723	Up	324.111	634.767	315.261	729.869	1547.72	1137.28		GO:0003677	DNA binding											GRMZM2G072669		Zm00001d028293	GRMZM2G161780	GRMZM2G447504
Zm00001d017912	GRMZM2G315726	302.807	154.883	450.73	2.91013	0.000891729	0.022227	Up	4.60557	5.00015	5.37448	22.4151	10.7546	11.2424		GO:0016021,GO:0005783	integral component of membrane|endoplasmic reticulum											GRMZM5G839593		Zm00001d028294	GRMZM2G476914	GRMZM2G161780
Zm00001d047124	GRMZM2G117956	35.7619	18.3868	53.137	2.88996	0.000985926	0.0239245	Up	1.10401	0.747209	1.04394	3.6843	2.68547	3.15687		GO:0004657,GO:0006562	proline dehydrogenase activity|proline catabolic process											#N/A		Zm00001d028295	GRMZM2G180478	GRMZM2G476914
Zm00001d047765	GRMZM2G162486	3164.37	1630.01	4698.73	2.88264	8.36073e-12	2.23207e-09	Up	33.0694	48.5073	42.8516	113.993	128.248	104.302		GO:0005515	protein binding											#N/A		Zm00001d028296	GRMZM2G180458	GRMZM2G180478
Zm00001d015243	GRMZM2G102845	53.3787	27.5127	79.2446	2.88029	0.000154665	0.00587161	Up	0.124747	0.268004	0.131375	0.506194	0.530509	0.305046		GO:0003677,GO:0006355,GO:0005634,GO:0009725,GO:0005515	DNA binding|regulation of transcription, DNA-templated|nucleus|response to hormone|protein binding											GRMZM2G431018		Zm00001d028297	GRMZM2G180452	GRMZM2G180458
Zm00001d048334	GRMZM2G055107	1107.29	570.987	1643.59	2.87851	1.31936e-11	3.45584e-09	Up	30.4352	28.0132	19.8159	88.9417	71.899	63.492														GRMZM2G140721		Zm00001d028298	GRMZM2G012126	GRMZM2G180452
Zm00001d012527	GRMZM2G068973	357.534	184.492	530.576	2.87588	0.000116347	0.00469531	Up	3.86498	7.20506	5.46539	20.7274	10.1867	17.5529		GO:0003677,GO:0006351,GO:0006355,GO:0005634	DNA binding|transcription, DNA-templated|regulation of transcription, DNA-templated|nucleus											GRMZM2G112309		Zm00001d028299	GRMZM2G091456	GRMZM2G012126
Zm00001d008619	GRMZM2G018177	3403.46	1756.62	5050.29	2.875	7.1496e-12	1.98509e-09	Up	29.5778	47.3356	38.4703	113.341	111.601	102.458		GO:0003824,GO:0008152,GO:0006096,GO:0004807	catalytic activity|metabolic process|glycolytic process|triose-phosphate isomerase activity											GRMZM2G013016		na	AC190934.3_FG003	GRMZM2G091456
Zm00001d037386	GRMZM2G036564	135.794	70.122	201.467	2.87309	0.003791	0.0623191	Up	0.455358	0.631745	0.704068	2.6851	1.13126	1.35449														GRMZM2G119150		Zm00001d028303	GRMZM2G153536	AC190934.3_FG003
Zm00001d026544	#N/A	22.551	11.6464	33.4557	2.87263	0.0141447	0.154557	Up	0.09827	0.115051	0.409174	0.276573	0.509892	0.53707		GO:0005524,GO:0000166,GO:0005737,GO:0006434,GO:0004828	ATP binding|nucleotide binding|cytoplasm|seryl-tRNA aminoacylation|serine-tRNA ligase activity											GRMZM2G154460		Zm00001d028304	GRMZM2G126808	GRMZM2G153536
Zm00001d034107	GRMZM2G069722	2366.47	1224.68	3508.27	2.86463	0.00562658	0.0820925	Up	24.1449	36.2227	24.5464	54.6765	106.901	60.1381		GO:0020037,GO:0005506,GO:0016705,GO:0055114	heme binding|iron ion binding|oxidoreductase activity, acting on paired donors, with incorporation or reduction of molecular oxygen|oxidation-reduction process											GRMZM2G074262		Zm00001d028307	GRMZM2G122543	GRMZM2G126808
Zm00001d040697	AC199526.5_FG002	2299.26	1190.96	3407.56	2.86118	8.19154e-12	2.20814e-09	Up	38.1662	36.7077	44.6948	146.219	101.475	100.806		GO:0046872,GO:0005524,GO:0004478,GO:0006730,GO:0006556	metal ion binding|ATP binding|methionine adenosyltransferase activity|one-carbon metabolic process|S-adenosylmethionine biosynthetic process											GRMZM2G421669		na	AC186009.3_FG001	GRMZM2G122543
Zm00001d044537	GRMZM2G010664	12.1844	6.31556	18.0531	2.85852	0.044697	0.320675	Up	0.187305	0.209071	0.0873229	0.412155	0.606865	0.329067		GO:0005515,GO:1900864	protein binding|mitochondrial RNA modification											#N/A		Zm00001d028308	GRMZM2G088843	AC186009.3_FG001
Zm00001d043649	GRMZM2G054221	682.36	353.711	1011.01	2.8583	0.00494601	0.0752471	Up	4.00971	3.49021	0.225321	5.32309	8.11395	8.77082		GO:0005524,GO:0004672,GO:0006468,GO:0003824,GO:0004106,GO:0009073,GO:0005515,GO:0046417	ATP binding|protein kinase activity|protein phosphorylation|catalytic activity|chorismate mutase activity|aromatic amino acid family biosynthetic process|protein binding|chorismate metabolic process											GRMZM2G039009		Zm00001d028311	GRMZM2G135877	GRMZM2G088843
Zm00001d052253	GRMZM2G041959	122.021	63.2704	180.771	2.85712	8.08785e-05	0.00344416	Up	1.6884	1.4339	1.68199	6.78917	4.18849	2.9721		GO:0005515	protein binding											GRMZM2G171373		na	GRMZM2G548849	GRMZM2G135877
Zm00001d009999	GRMZM2G172795	17.1084	8.87311	25.3438	2.85624	0.0135441	0.150001	Up	0.749479	0.363329	0.332839	2.08791	1.33214	0.89151														GRMZM2G115772		Zm00001d028313	GRMZM2G110131	GRMZM2G548849
Zm00001d006029	GRMZM2G003947	12.6622	6.57139	18.753	2.85374	0.0499577	0.344087	Up	0.204227	0.405457	0.370243	0.54661	1.16455	0.988453														GRMZM2G445261		Zm00001d028314	GRMZM5G896413	GRMZM2G110131
Zm00001d014953	GRMZM2G159013	915.053	475.341	1354.76	2.85009	4.13565e-08	5.16962e-06	Up	9.23815	13.2145	10.1237	41.121	24.9287	25.1303		GO:0016021,GO:0004325,GO:0006783	integral component of membrane|ferrochelatase activity|heme biosynthetic process											AC206266.3_FG001		Zm00001d028315	GRMZM2G034737	GRMZM5G896413
Zm00001d050224	GRMZM2G174732	16.1311	8.38013	23.8821	2.84985	0.0213418	0.202538	Up	0.141758	0.244778	0.272864	0.947234	0.422006	0.493496		GO:0016021,GO:0003824,GO:0008152,GO:0016874	integral component of membrane|catalytic activity|metabolic process|ligase activity											GRMZM2G137435		Zm00001d028317	GRMZM2G043584	GRMZM2G034737
Zm00001d041472	GRMZM2G114850	47.4396	24.6472	70.2321	2.8495	0.000300602	0.00979602	Up	1.53478	0.462783	0.886501	3.79026	2.45881	2.22186		GO:0003677,GO:0006355	DNA binding|regulation of transcription, DNA-templated											GRMZM2G106213		na	GRMZM2G043569	GRMZM2G043584
Zm00001d019206	GRMZM2G410033	21.5758	11.2183	31.9333	2.84655	0.00875015	0.11152	Up	0.331651	0.228667	0.269738	1.00909	0.618113	0.919723		GO:0016021,GO:0003333	integral component of membrane|amino acid transmembrane transport											GRMZM2G342907		Zm00001d028318	GRMZM2G043542	GRMZM2G043569
Zm00001d000001	#N/A	26.954	14.0299	39.8781	2.84238	0.0105709	0.127277	Up	0.200259	0.275776	0.4744	1.45552	0.54261	0.860636		GO:0016491,GO:0008152,GO:0055114,GO:0004097,GO:0046872	oxidoreductase activity|metabolic process|oxidation-reduction process|catechol oxidase activity|metal ion binding											GRMZM2G047791		na	GRMZM2G344996	GRMZM2G043542
Zm00001d016616	GRMZM2G016434	18.8425	9.81345	27.8715	2.84014	0.0157519	0.165726	Up	0.475865	0.52272	0.475152	1.44981	1.88229	0.848626		GO:0003677,GO:0006355,GO:0003700	DNA binding|regulation of transcription, DNA-templated|transcription factor activity, sequence-specific DNA binding											GRMZM2G073548		Zm00001d028319	GRMZM2G043470	GRMZM2G344996
Zm00001d014328	GRMZM2G012926	166.162	86.6822	245.643	2.83383	3.27234e-07	3.13298e-05	Up	1.93693	3.42869	2.88565	6.79501	8.869	7.59093														GRMZM2G318299		Zm00001d028321	GRMZM2G364178	GRMZM2G043470
Zm00001d019750	GRMZM2G032766	166.064	86.6369	245.49	2.83355	0.00250078	0.046197	Up	4.61919	4.41114	6.92427	26.1845	14.0496	9.82821		GO:0016021,GO:0005515	integral component of membrane|protein binding											GRMZM2G004519		na	GRMZM2G364145	GRMZM2G364178
Zm00001d036761	GRMZM5G862355	15.8996	8.29837	23.5009	2.83199	0.0277955	0.239003	Up	0.162183	0.0618488	0.416236	0.652788	0.537354	0.6255														GRMZM2G410812		Zm00001d028324	GRMZM2G031560	GRMZM2G364145
Zm00001d015829	GRMZM2G029951	921.757	481.884	1361.63	2.82564	2.06923e-07	2.12786e-05	Up	5.10651	6.18788	4.84672	20.437	12.1297	12.3195		GO:0046872,GO:0016021,GO:0000166,GO:0005507,GO:0030001,GO:0019829,GO:0006812	metal ion binding|integral component of membrane|nucleotide binding|copper ion binding|metal ion transport|cation-transporting ATPase activity|cation transport											GRMZM2G078667		Zm00001d028325	GRMZM2G065635	GRMZM2G031560
Zm00001d011418	GRMZM2G056247	2665.08	1394.43	3935.74	2.82248	3.06474e-05	0.00155974	Up	14.1336	32.4764	13.4595	47.9146	61.5049	56.0647		GO:0020037,GO:0005506,GO:0016705,GO:0055114,GO:0004497	heme binding|iron ion binding|oxidoreductase activity, acting on paired donors, with incorporation or reduction of molecular oxygen|oxidation-reduction process|monooxygenase activity											GRMZM2G143883		Zm00001d028328	GRMZM2G133573	GRMZM2G065635
Zm00001d038625	GRMZM2G090338	5936.33	3109.74	8762.91	2.81789	6.59386e-12	1.86815e-09	Up	54.7704	45.436	38.6024	124.328	141.109	115.564		GO:0051539,GO:0020037,GO:0016491,GO:0009507,GO:0051536,GO:0055114,GO:0050311,GO:0048046,GO:0016020,GO:0009570,GO:0009941,GO:0010319,GO:0005507,GO:0016002,GO:0006790	4 iron, 4 sulfur cluster binding|heme binding|oxidoreductase activity|chloroplast|iron-sulfur cluster binding|oxidation-reduction process|sulfite reductase (ferredoxin) activity|apoplast|membrane|chloroplast stroma|chloroplast envelope|stromule|copper ion binding|sulfite reductase activity|sulfur compound metabolic process											GRMZM2G128080		na	GRMZM2G554644	GRMZM2G133573
Zm00001d012131	GRMZM2G371890	68.5575	35.9245	101.191	2.81676	5.6385e-05	0.00260055	Up	0.566286	0.620278	0.672387	1.79471	1.57585	1.57617		GO:0005737,GO:0006457	cytoplasm|protein folding											GRMZM2G018707		na	GRMZM2G012758	GRMZM2G554644
Zm00001d003895	GRMZM2G123940	26.333	13.8062	38.8599	2.81466	0.00451782	0.0708686	Up	0.11887	0.256419	0.421949	1.17229	0.360525	0.435585		GO:0006508,GO:0004185	proteolysis|serine-type carboxypeptidase activity											GRMZM2G116902		Zm00001d028330	GRMZM2G311165	GRMZM2G012758
Zm00001d019227	#N/A	48.0402	25.1973	70.8831	2.81313	0.000238511	0.00825717	Up	3.13429	1.72607	2.45982	8.60105	4.44509	7.66542														GRMZM2G113800		Zm00001d028332	GRMZM2G012501	GRMZM2G311165
Zm00001d009858	GRMZM2G139874	2618.92	1375.18	3862.65	2.80883	1.31069e-08	1.88556e-06	Up	22.6326	18.548	31.5015	75.0639	77.1701	53.6109		GO:0020037,GO:0005506,GO:0016705,GO:0055114,GO:0004497	heme binding|iron ion binding|oxidoreductase activity, acting on paired donors, with incorporation or reduction of molecular oxygen|oxidation-reduction process|monooxygenase activity											GRMZM2G453672		Zm00001d028337	GRMZM2G072292	GRMZM2G012501
Zm00001d043365	GRMZM2G111657	197.909	104.168	291.65	2.7998	1.51002e-05	0.000855629	Up	1.37575	1.50827	2.72591	6.97768	3.90601	4.54957		GO:0000145,GO:0006887	exocyst|exocytosis											AC197764.4_FG003		Zm00001d028338	GRMZM2G072041	GRMZM2G072292
Zm00001d002610	GRMZM2G476597	42.263	22.2544	62.2717	2.79818	0.00073085	0.0192867	Up	1.23416	0.208909	0.762081	2.66112	1.98212	1.44663		GO:0016021,GO:0020037,GO:0005506,GO:0016705,GO:0055114	integral component of membrane|heme binding|iron ion binding|oxidoreductase activity, acting on paired donors, with incorporation or reduction of molecular oxygen|oxidation-reduction process											GRMZM2G164277		Zm00001d028339	GRMZM2G072088	GRMZM2G072041
Zm00001d033747	GRMZM2G024104	1317.92	695.222	1940.62	2.79137	0.0134323	0.149134	Up	17.2716	12.1915	10.5202	63.0998	25.9663	28.1813		GO:0003824,GO:0006807,GO:0004356,GO:0005524,GO:0006542	catalytic activity|nitrogen compound metabolic process|glutamate-ammonia ligase activity|ATP binding|glutamine biosynthetic process											GRMZM5G894568		Zm00001d028339	GRMZM2G343916	GRMZM2G072088
Zm00001d038820	GRMZM2G126079	55.4333	29.2656	81.601	2.78829	0.0176587	0.178581	Up	0.945029	0.317849	0.758715	2.59643	1.07218	1.112		GO:0005096	GTPase activator activity											GRMZM2G160840		Zm00001d028340	GRMZM5G889013	GRMZM2G343916
Zm00001d032306	GRMZM2G059985	165.4	87.349	243.45	2.7871	2.96484e-07	2.92949e-05	Up	5.05235	4.00026	3.97878	11.0575	13.0981	11.6955														GRMZM2G010435		Zm00001d028341	GRMZM2G149038	GRMZM5G889013
Zm00001d013459	#N/A	40.3311	21.2998	59.3624	2.787	0.00817373	0.106496	Up	0.43496	0.453653	0.0403093	0.722806	0.676248	0.672164														GRMZM2G130943		Zm00001d028343	AC196789.3_FG001	GRMZM2G149038
Zm00001d012145	GRMZM2G700757	22.7006	11.9901	33.411	2.78656	0.0084522	0.108949	Up	0.320592	0.27823	0.271351	0.855626	0.585417	0.555765		GO:0003677,GO:0005524,GO:0008094,GO:0006310,GO:0006281,GO:0003697,GO:0006259	DNA binding|ATP binding|DNA-dependent ATPase activity|DNA recombination|DNA repair|single-stranded DNA binding|DNA metabolic process											GRMZM5G817182		Zm00001d028344	GRMZM2G118497	AC196789.3_FG001
Zm00001d005001	GRMZM2G141081	331.382	175.17	487.594	2.78354	0.00439599	0.0694677	Up	0.716854	5.27755	1.36338	7.27188	8.13354	5.7254		GO:0016021,GO:0055085	integral component of membrane|transmembrane transport											GRMZM6G220418		na	GRMZM2G116292	GRMZM2G118497
Zm00001d052194	GRMZM2G007729	655.212	346.37	964.054	2.78331	0.0274106	0.237015	Up	17.4978	12.7645	23.2987	85.7463	31.414	35.4515		GO:0005739,GO:0009408,GO:0051082	mitochondrion|response to heat|unfolded protein binding											GRMZM2G172795		Zm00001d028347	GRMZM2G116823	GRMZM2G116292
Zm00001d027585	GRMZM2G157510	26.7384	14.1438	39.333	2.78093	0.00558006	0.0818439	Up	0.485027	0.60715	0.688094	1.88011	2.0026	1.34952		GO:0005634,GO:0007050,GO:0004861	nucleus|cell cycle arrest|cyclin-dependent protein serine/threonine kinase inhibitor activity											GRMZM2G008935		Zm00001d028348	GRMZM2G116846	GRMZM2G116823
Zm00001d016441	GRMZM2G412604	7887.31	4174.14	11600.5	2.77913	1.45577e-11	3.7082e-09	Up	45.4028	43.1746	36.2418	107.678	127.9	102.089		GO:0003824,GO:0009058,GO:0030170,GO:0008483,GO:0006520	catalytic activity|biosynthetic process|pyridoxal phosphate binding|transaminase activity|cellular amino acid metabolic process											GRMZM2G021704		Zm00001d028349	GRMZM2G116902	GRMZM2G116846
Zm00001d047638	AC233955.1_FG008	39.7428	21.0354	58.4502	2.77866	0.00517049	0.0775573	Up	1.25553	0.779214	1.17856	5.26059	2.53798	2.2881														GRMZM5G831843		Zm00001d028351	GRMZM2G101841	GRMZM2G116902
Zm00001d005460	GRMZM2G074687	714.752	378.405	1051.1	2.7777	0.00156493	0.0328969	Up	4.00353	4.03633	4.13915	16.7568	7.72804	8.32116		GO:0005509,GO:0005783,GO:0006457,GO:0051082,GO:0005515	calcium ion binding|endoplasmic reticulum|protein folding|unfolded protein binding|protein binding											#N/A		Zm00001d028352	GRMZM2G096877	GRMZM2G101841
Zm00001d014990	GRMZM2G389155	189.342	100.289	278.395	2.77592	0.00814013	0.106108	Up	2.64733	2.54522	3.89908	5.44398	12.0171	5.71728		GO:0005515	protein binding											GRMZM2G178704		Zm00001d028354	GRMZM2G079889	GRMZM2G096877
Zm00001d019034	GRMZM2G144653	2274.19	1204.93	3343.45	2.77481	0.00335197	0.0570121	Up	106.114	89.122	104.031	440.604	200.957	204.83		GO:0005623,GO:0045454,GO:0015035,GO:0006662	cell|cell redox homeostasis|protein disulfide oxidoreductase activity|glycerol ether metabolic process											GRMZM2G018436		Zm00001d028355	GRMZM2G167138	GRMZM2G079889
Zm00001d031351	GRMZM2G137861	1279.45	678.218	1880.69	2.77298	0.000986621	0.0239245	Up	13.2632	2.36592	9.77126	33.4804	18.6634	17.3883		GO:0016021,GO:0005524,GO:0004672,GO:0030247,GO:0006468	integral component of membrane|ATP binding|protein kinase activity|polysaccharide binding|protein phosphorylation											GRMZM2G431021		Zm00001d028356	GRMZM2G167151	GRMZM2G167138
Zm00001d020755	GRMZM2G072669	111.639	59.1799	164.098	2.77287	0.00121714	0.0276084	Up	0.998522	1.66393	0.963034	2.41886	3.49225	3.79294														GRMZM2G340654		Zm00001d028357	GRMZM2G467695	GRMZM2G167151
Zm00001d015918	GRMZM2G103864	156.286	82.8659	229.706	2.77202	0.0130862	0.146507	Up	14.677	11.339	18.9288	68.3309	25.1442	27.2394														GRMZM2G014981		Zm00001d028358	GRMZM2G147603	GRMZM2G467695
Zm00001d028398	GRMZM2G108032	103.588	54.9988	152.178	2.76693	0.0469519	0.330198	Up	1.20868	1.69522	1.15765	2.61763	5.82806	2.70416		GO:0004553,GO:0005975	hydrolase activity, hydrolyzing O-glycosyl compounds|carbohydrate metabolic process											GRMZM2G013726		Zm00001d028359	GRMZM2G061096	GRMZM2G147603
Zm00001d021288	GRMZM2G091837	113.126	60.2118	166.04	2.7576	3.85513e-06	0.000260733	Up	2.39969	2.59977	2.62494	8.68223	8.47821	5.62974														#N/A		Zm00001d028360	GRMZM2G060952	GRMZM2G061096
Zm00001d008820	GRMZM2G147882	478.024	254.718	701.329	2.75335	2.20889e-06	0.000161394	Up	2.88552	3.83924	4.58379	14.2542	9.73238	7.25205		GO:0016491,GO:0005506,GO:0055114	oxidoreductase activity|iron ion binding|oxidation-reduction process											GRMZM2G333659		Zm00001d028361	GRMZM2G465595	GRMZM2G060952
Zm00001d002695	GRMZM2G388585	714.944	381.057	1048.83	2.75242	4.54244e-08	5.50747e-06	Up	1.60078	3.9706	2.42613	6.56419	7.25494	6.87862														GRMZM2G141535		Zm00001d028362	GRMZM2G100629	GRMZM2G465595
Zm00001d046979	GRMZM2G313162	702.168	374.948	1029.39	2.74542	5.70799e-10	1.11607e-07	Up	3.37603	4.73372	3.51274	11.3095	11.1681	9.30337		GO:0003824,GO:0030170,GO:0006777,GO:0030151,GO:0008265	catalytic activity|pyridoxal phosphate binding|Mo-molybdopterin cofactor biosynthetic process|molybdenum ion binding|Mo-molybdopterin cofactor sulfurase activity											GRMZM2G096115		Zm00001d028363	GRMZM2G100714	GRMZM2G100629
Zm00001d050790	GRMZM2G009019	17.5162	9.35447	25.6779	2.74499	0.0223008	0.207779	Up	0.110086	0.104222	0.198541	0.462881	0.302574	0.320759														GRMZM2G419777		Zm00001d028365	GRMZM2G152360	GRMZM2G100714
Zm00001d042673	GRMZM2G339699	2150.64	1149.83	3151.46	2.74081	0.000845187	0.0214503	Up	55.5659	49.1337	49.5495	106.021	190.905	127.973		GO:0046872,GO:0009116,GO:0006189,GO:0051536,GO:0009113,GO:0004044	metal ion binding|nucleoside metabolic process|'de novo' IMP biosynthetic process|iron-sulfur cluster binding|purine nucleobase biosynthetic process|amidophosphoribosyltransferase activity											GRMZM2G117865		Zm00001d028366	GRMZM2G152390	GRMZM2G152360
Zm00001d027622	GRMZM2G355846	26.3473	14.0943	38.6004	2.73873	0.039364	0.298129	Up	0.221972	0.141585	0.374965	1.14636	0.365423	0.537077		GO:0008270,GO:0005515	zinc ion binding|protein binding											GRMZM5G875864		Zm00001d028367	GRMZM2G152447	GRMZM2G152390
Zm00001d044027	AC194056.3_FG008	26.9446	14.4188	39.4705	2.73743	0.00584914	0.084452	Up	2.86404	0.764082	2.05584	9.51594	10.5688	5.23229														GRMZM2G160231		Zm00001d028368	GRMZM2G152477	GRMZM2G152447
Zm00001d020732	GRMZM2G003246	620.696	332.191	909.202	2.73698	8.28563e-10	1.54396e-07	Up	15.375	15.0416	15.964	50.0253	37.6772	37.8252		GO:0008152,GO:0016787	metabolic process|hydrolase activity											GRMZM2G041961		Zm00001d028369	GRMZM2G152549	GRMZM2G152477
Zm00001d013782	GRMZM2G178753	19.6094	10.4961	28.7227	2.73653	0.0146492	0.157593	Up	0.145626	0.191819	0.191693	0.736137	0.358784	0.354312		GO:0016021,GO:0005524,GO:0004672,GO:0006468,GO:0005515	integral component of membrane|ATP binding|protein kinase activity|protein phosphorylation|protein binding											GRMZM2G381378		Zm00001d028370	GRMZM2G152663	GRMZM2G152549
Zm00001d045537	GRMZM2G042323	82.5473	44.1924	120.902	2.73581	0.000111118	0.00452373	Up	0.211601	0.170532	0.32482	1.11218	0.427968	0.668975		GO:0003677,GO:0006310,GO:0006302	DNA binding|DNA recombination|double-strand break repair											GRMZM2G174315		Zm00001d028371	GRMZM2G157197	GRMZM2G152663
Zm00001d047909	GRMZM2G145085	16.5894	8.88436	24.2945	2.73453	0.0480586	0.335745	Up	0.0327655	0.140747	0.214026	0.539188	0.360686	0.15688		GO:0003677,GO:0005634,GO:0003824,GO:0006367,GO:0032968	DNA binding|nucleus|catalytic activity|transcription initiation from RNA polymerase II promoter|positive regulation of transcription elongation from RNA polymerase II promoter											#N/A		Zm00001d028372	GRMZM2G157177	GRMZM2G157197
Zm00001d017700	GRMZM2G060919	114.496	61.4906	167.502	2.72403	0.00176411	0.0359095	Up	0.110176	0.219466	0.443979	0.778235	0.388562	0.597554														AC195587.4_FG004		Zm00001d028373	GRMZM2G157157	GRMZM2G157177
Zm00001d009088	#N/A	41.8313	22.4713	61.1914	2.72309	0.00115761	0.026541	Up	0.828615	1.87227	1.05989	3.03813	3.16858	2.15292														GRMZM2G132913		Zm00001d028374	GRMZM2G055052	GRMZM2G157157
Zm00001d002928	GRMZM5G817182	42.9852	23.092	62.8785	2.72296	0.0385631	0.294411	Up	0.274224	2.37886	0.59894	2.09609	4.04065	3.59394														GRMZM5G815077		Zm00001d028375	GRMZM2G099528	GRMZM2G055052
Zm00001d009084	GRMZM2G148904	404.122	217.175	591.07	2.72164	0.00639903	0.0895509	Up	10.1286	8.43254	17.8392	53.8486	24.002	27.42		GO:0008152,GO:0008168,GO:0005739	metabolic process|methyltransferase activity|mitochondrion											GRMZM2G125482		Zm00001d028380	GRMZM2G085427	GRMZM2G099528
Zm00001d048585	GRMZM2G000531	1006.86	541.088	1472.63	2.72161	4.88241e-09	7.87461e-07	Up	14.8174	18.4129	15.1767	39.1005	50.4184	42.1387		GO:0016491,GO:0005506,GO:0006633,GO:0055114,GO:0016021	oxidoreductase activity|iron ion binding|fatty acid biosynthetic process|oxidation-reduction process|integral component of membrane											GRMZM2G310144		Zm00001d028380	GRMZM2G104255	GRMZM2G085427
Zm00001d005028	GRMZM2G018436	24.0032	12.908	35.0985	2.71912	0.0230212	0.212072	Up	0.46751	0.661714	0.230535	2.06988	0.481107	1.35859		GO:0003677,GO:0006351,GO:0006355,GO:0005634	DNA binding|transcription, DNA-templated|regulation of transcription, DNA-templated|nucleus											GRMZM2G151319		Zm00001d028384	GRMZM5G868062	GRMZM2G104255
Zm00001d017427	GRMZM2G135291	23.0265	12.384	33.669	2.71874	0.0118901	0.137954	Up	0.272099	0.162909	0.621934	0.932584	0.962551	1.01585		GO:0055085	transmembrane transport											GRMZM2G102183		Zm00001d028385	GRMZM5G849530	GRMZM5G868062
Zm00001d039617	GRMZM5G820912	31.8984	17.1585	46.6383	2.71808	0.00365516	0.0606609	Up	0.0531982	0.066827	0.0828264	0.162444	0.145332	0.128289		GO:0005524,GO:0003777,GO:0007018,GO:0008017,GO:0005515	ATP binding|microtubule motor activity|microtubule-based movement|microtubule binding|protein binding											GRMZM2G059939		Zm00001d028386	GRMZM5G818431	GRMZM5G849530
Zm00001d032789	GRMZM2G416120	510.949	274.977	746.92	2.71631	0.0413662	0.307482	Up	2.90455	2.5748	4.00042	14.8652	5.06632	5.32121	Chaperonin CPN60-2, mitochondrial [Source:Uniprot/SWISSPROT;Acc:Q43298]	GO:0005524,GO:0005739,GO:0005737,GO:0006457,GO:0042026	ATP binding|mitochondrion|cytoplasm|protein folding|protein refolding											GRMZM2G157510		na	AC231441.1_FG004	GRMZM5G818431
Zm00001d037849	GRMZM2G147245	17.8286	9.59916	26.058	2.71462	0.0224324	0.208865	Up	0.115907	0.335988	0.436486	1.27079	0.437433	0.691933		GO:0020037,GO:0005506,GO:0016705,GO:0055114,GO:0004497	heme binding|iron ion binding|oxidoreductase activity, acting on paired donors, with incorporation or reduction of molecular oxygen|oxidation-reduction process|monooxygenase activity											GRMZM2G052630		Zm00001d028388	AC155390.2_FG002	AC231441.1_FG004
Zm00001d016922	GRMZM5G839593	60.7179	32.7109	88.7248	2.71239	0.000181288	0.00669687	Up	0.594252	0.803045	0.828593	2.41619	1.60049	2.06228		GO:0016021,GO:0055085,GO:0022857	integral component of membrane|transmembrane transport|transmembrane transporter activity											GRMZM2G101245		Zm00001d028389	GRMZM2G360234	AC155390.2_FG002
Zm00001d007255	GRMZM2G127134	137.049	73.8591	200.239	2.71109	0.000868245	0.0218954	Up	0.422732	3.56016	1.88008	6.33126	5.40899	4.48859		GO:0016021,GO:0006810,GO:0016020,GO:0005215	integral component of membrane|transport|membrane|transporter activity											GRMZM2G122198		Zm00001d028390	GRMZM2G059260	GRMZM2G360234
Zm00001d004545	#N/A	26.9251	14.5341	39.3162	2.7051	0.0391616	0.29692	Up	0.297375	0.369734	0.876578	2.38635	0.913423	1.17494		GO:0016021,GO:0016020,GO:0015018	integral component of membrane|membrane|galactosylgalactosylxylosylprotein 3-beta-glucuronosyltransferase activity											GRMZM2G162829		Zm00001d028391	GRMZM2G147942	GRMZM2G059260
Zm00001d041327	GRMZM2G061527	29.4561	15.9278	42.9845	2.69871	0.00539204	0.0800588	Up	0.194665	0.351174	0.504901	1.12502	0.846601	0.939537		GO:0005515	protein binding											GRMZM2G434557		Zm00001d028392	GRMZM2G077942	GRMZM2G147942
Zm00001d013410	GRMZM2G152328	171.747	92.8741	250.621	2.6985	0.000338787	0.0107996	Up	0.856574	2.92358	2.73855	8.35013	4.924	4.56493		GO:0005524	ATP binding											GRMZM2G018666		na	GRMZM2G165921	GRMZM2G077942
Zm00001d046952	#N/A	3138.24	1697.42	4579.06	2.69767	7.3595e-06	0.000464401	Up	44.2524	41.2738	24.4991	78.4611	107.666	103.492		GO:0008152,GO:0016787,GO:0006508,GO:0008237,GO:0016813	metabolic process|hydrolase activity|proteolysis|metallopeptidase activity|hydrolase activity, acting on carbon-nitrogen (but not peptide) bonds, in linear amidines											GRMZM2G177561		Zm00001d028396	GRMZM2G165926	GRMZM2G165921
Zm00001d039245	GRMZM5G871347	212.943	115.218	310.667	2.69634	1.40908e-07	1.51639e-05	Up	2.7756	6.13846	3.09099	13.2718	9.96183	9.77392		GO:0006355,GO:0003700,GO:0043565	regulation of transcription, DNA-templated|transcription factor activity, sequence-specific DNA binding|sequence-specific DNA binding											GRMZM5G898867		Zm00001d028397	GRMZM2G108138	GRMZM2G165926
Zm00001d016016	GRMZM2G346133	226.881	122.764	330.997	2.6962	0.00042695	0.0129132	Up	2.03623	2.34103	1.80052	3.61552	1.91721	3.21872		GO:0030286,GO:0007017	dynein complex|microtubule-based process											GRMZM2G091839		Zm00001d028398	GRMZM2G108032	GRMZM2G108138
Zm00001d014344	GRMZM2G350626	4310.66	2334.14	6287.18	2.69357	0.0328258	0.268535	Up	7.88918	6.72083	5.7932	8.29601	21.3998	22.6725		GO:0016021,GO:0055114	integral component of membrane|oxidation-reduction process											GRMZM2G123037		Zm00001d028399	GRMZM2G346861	GRMZM2G108032
Zm00001d047452	GRMZM2G167336	195.96	106.109	285.811	2.69356	5.58684e-05	0.00258962	Up	3.55254	2.96892	7.1043	17.4952	13.2109	9.35698		GO:0020037,GO:0005506,GO:0016705,GO:0004497,GO:0055114	heme binding|iron ion binding|oxidoreductase activity, acting on paired donors, with incorporation or reduction of molecular oxygen|monooxygenase activity|oxidation-reduction process											GRMZM5G832135		Zm00001d028400	GRMZM2G159110	GRMZM2G346861
Zm00001d042608	GRMZM2G376085	26.5601	14.3829	38.7373	2.69329	0.00531177	0.0789937	Up	0.150156	0.191017	0.128488	0.617278	0.277524	0.33942		GO:0004842,GO:0016567,GO:0005515,GO:0005488,GO:0005524	ubiquitin-protein transferase activity|protein ubiquitination|protein binding|binding|ATP binding											GRMZM2G371890		Zm00001d028401	GRMZM2G149481	GRMZM2G159110
Zm00001d028320	#N/A	31.4507	17.0538	45.8476	2.68841	0.0254596	0.226941	Up	0.195698	0	0.11063	0.137846	0.358357	0.22107														GRMZM2G365282		na	AC177947.2_FG003	GRMZM2G149481
Zm00001d002275	GRMZM2G084181	15078.3	8181.65	21974.9	2.68588	6.21739e-08	7.28379e-06	Up	28.1841	27.022	23.3821	63.0705	81.2347	60.5578		GO:0016021,GO:0005524,GO:0006810,GO:0055085,GO:0042626,GO:0016887	integral component of membrane|ATP binding|transport|transmembrane transport|ATPase activity, coupled to transmembrane movement of substances|ATPase activity											GRMZM2G421899		Zm00001d028404	GRMZM2G448368	AC177947.2_FG003
Zm00001d042780	GRMZM6G183316	14.7632	8.01836	21.5081	2.68236	0.03172	0.261725	Up	0.31121	0.517518	0.0776051	1.33837	0.717966	0.635952														GRMZM2G124229		Zm00001d028405	GRMZM2G149624	GRMZM2G448368
Zm00001d020986	GRMZM2G044968	38.4829	20.9196	56.0463	2.67913	0.0054847	0.0807437	Up	0.61111	0.151984	0.570048	1.75678	1.05947	0.736888														#N/A		Zm00001d028406	GRMZM2G149636	GRMZM2G149624
Zm00001d012604	GRMZM2G030769	58.0033	31.5445	84.462	2.67755	0.000288144	0.00954693	Up	0.874211	0.943099	1.50621	3.25739	2.92936	2.63866														GRMZM2G086285		Zm00001d028407	GRMZM2G149646	GRMZM2G149636
Zm00001d032274	GRMZM2G169198	31.7962	17.348	46.2444	2.66568	0.0138221	0.152109	Up	0.198181	0.199025	0.233768	0.393044	0.750945	0.407385														GRMZM2G044968		Zm00001d028408	GRMZM2G149647	GRMZM2G149646
Zm00001d045935	GRMZM2G113480	529.366	288.836	769.895	2.66551	3.18815e-08	4.11716e-06	Up	32.5931	41.0711	37.4339	99.4378	128.696	106.718														GRMZM2G466309		Zm00001d028409	GRMZM2G042253	GRMZM2G149647
Zm00001d043607	GRMZM2G171373	45.3533	24.8126	65.894	2.65566	0.00265048	0.0480043	Up	0.62631	0.594787	0.484687	2.30351	1.24991	0.967113		GO:0005524,GO:0005975,GO:0016773,GO:0004396,GO:0005536,GO:0001678,GO:0046835,GO:0005623,GO:0006096	ATP binding|carbohydrate metabolic process|phosphotransferase activity, alcohol group as acceptor|hexokinase activity|glucose binding|cellular glucose homeostasis|carbohydrate phosphorylation|cell|glycolytic process											GRMZM2G076885		Zm00001d028410	GRMZM2G172537	GRMZM2G042253
Zm00001d006360	GRMZM2G114322	130.318	71.4473	189.188	2.64793	0.0134417	0.149134	Up	4.51078	3.34424	3.66308	15.7531	7.6467	6.71403		GO:0005576	extracellular region											GRMZM2G356714		Zm00001d028412	GRMZM2G165944	GRMZM2G172537
Zm00001d048131	GRMZM2G130943	31.4564	17.2508	45.6619	2.64694	0.0401224	0.30247	Up	0.322845	0.308262	0.845525	2.11495	0.669662	1.37983		GO:0046872,GO:0004722,GO:0003824,GO:0043169,GO:0006470	metal ion binding|protein serine/threonine phosphatase activity|catalytic activity|cation binding|protein dephosphorylation											GRMZM2G076343		Zm00001d028413	GRMZM2G110913	GRMZM2G165944
Zm00001d021283	GRMZM2G132032	22.202	12.1796	32.2244	2.64577	0.013871	0.152465	Up	0.186515	0.050784	0.0969066	0.247341	0.336112	0.227943		GO:0004252,GO:0006508	serine-type endopeptidase activity|proteolysis											GRMZM2G161905		na	GRMZM2G410603	GRMZM2G110913
Zm00001d043485	GRMZM2G042548	73.0473	40.1083	105.986	2.6425	0.000376643	0.0116843	Up	1.604	1.09464	0.0977722	2.54235	2.57716	2.22456														GRMZM2G145045		Zm00001d028414	GRMZM2G110023	GRMZM2G410603
Zm00001d036401	GRMZM2G141931	5378.5	2955.93	7801.08	2.63913	0.00118871	0.0270972	Up	19.4338	18.9774	19.9857	77.0875	37.4882	38.2343		GO:0005524,GO:0006457,GO:0006950,GO:0051082	ATP binding|protein folding|response to stress|unfolded protein binding											GRMZM2G036703		Zm00001d028415	GRMZM2G110004	GRMZM2G110023
Zm00001d043853	GRMZM2G077375	247.668	136.121	359.216	2.63894	2.61643e-05	0.00137847	Up	4.25145	3.181	0.975186	9.84371	9.30488	5.89512		GO:0004144,GO:0045017	diacylglycerol O-acyltransferase activity|glycerolipid biosynthetic process											GRMZM2G478553		Zm00001d028416	GRMZM2G035552	GRMZM2G110004
Zm00001d020148	GRMZM2G056875	69.5132	38.3097	100.717	2.62901	0.00225563	0.042925	Up	1.19378	0.45509	0.491413	3.33042	1.13435	2.44967		GO:0005524,GO:0004672,GO:0006468	ATP binding|protein kinase activity|protein phosphorylation											GRMZM2G061289		Zm00001d028417	GRMZM2G035461	GRMZM2G035552
Zm00001d028465	GRMZM2G174615	47.0547	25.9364	68.1731	2.62847	0.0169614	0.173904	Up	1.18679	1.5334	2.76562	7.53339	2.61101	4.93357		GO:0016021	integral component of membrane											GRMZM2G369629		Zm00001d028419	GRMZM2G321033	GRMZM2G035461
Zm00001d033300	GRMZM2G043191	131.827	72.7081	190.945	2.62619	0.00532181	0.0790584	Up	3.15109	2.24439	0.433157	7.55839	3.69032	5.64464		GO:0046856,GO:0004439,GO:0034485,GO:0043813,GO:0005886	phosphatidylinositol dephosphorylation|phosphatidylinositol-4,5-bisphosphate 5-phosphatase activity|phosphatidylinositol-3,4,5-trisphosphate 5-phosphatase activity|phosphatidylinositol-3,5-bisphosphate 5-phosphatase activity|plasma membrane											GRMZM2G033359		Zm00001d028420	GRMZM2G703543	GRMZM2G321033
Zm00001d052008	GRMZM2G178955	138.648	76.5266	200.77	2.62353	3.28185e-06	0.000229523	Up	1.11294	1.11263	1.11448	3.28757	2.93613	2.44781		GO:0048268,GO:0005545,GO:0030136,GO:0005543,GO:0030276	clathrin coat assembly|1-phosphatidylinositol binding|clathrin-coated vesicle|phospholipid binding|clathrin binding											GRMZM2G071147		Zm00001d028421	AC212209.2_FG010	GRMZM2G703543
Zm00001d047293	GRMZM2G127853	100.395	55.5031	145.287	2.61764	3.07413e-05	0.00156039	Up	1.6463	4.92308	3.5867	7.99752	10.2827	9.34545														AC205471.4_FG003		Zm00001d028422	GRMZM2G019689	AC212209.2_FG010
Zm00001d028180	GRMZM2G155242	3457.5	1913.07	5001.93	2.61461	9.07733e-05	0.00380139	Up	18.9693	22.3358	18.4845	76.9933	43.3917	41.6051		GO:0008654,GO:0004512,GO:0006021	phospholipid biosynthetic process|inositol-3-phosphate synthase activity|inositol biosynthetic process											GRMZM2G403719		Zm00001d028423	GRMZM2G179907	GRMZM2G019689
Zm00001d016586	GRMZM2G423643	45.6793	25.2827	66.0758	2.61347	0.000718871	0.0189909	Up	0.485141	0.346098	0.302386	1.43465	0.79864	0.840351		GO:0005737,GO:0005515	cytoplasm|protein binding											GRMZM2G171254		Zm00001d028424	GRMZM2G170532	GRMZM2G179907
Zm00001d044431	GRMZM2G022642	140.983	78.1068	203.86	2.61002	3.24662e-06	0.000228209	Up	3.04187	2.08797	3.88676	10.8983	8.0473	7.22461		GO:0016021,GO:0016020,GO:0003333,GO:0015171,GO:0006865	integral component of membrane|membrane|amino acid transmembrane transport|amino acid transmembrane transporter activity|amino acid transport											GRMZM2G154332		Zm00001d028425	GRMZM2G170382	GRMZM2G170532
Zm00001d010512	GRMZM2G010452	42.7873	23.7145	61.86	2.60853	0.0130199	0.146119	Up	0.207484	0.297424	0.388933	1.28581	0.636529	0.503212		GO:0006886,GO:0008565,GO:0006913,GO:0005515,GO:0008536,GO:0005488	intracellular protein transport|protein transporter activity|nucleocytoplasmic transport|protein binding|Ran GTPase binding|binding											GRMZM2G140448		Zm00001d028426	GRMZM2G170336	GRMZM2G170382
Zm00001d051842	GRMZM2G019177	1174.91	652.115	1697.7	2.60337	1.83536e-09	3.309e-07	Up	5.96183	11.4168	9.03962	23.5341	23.8292	19.7229														GRMZM2G156150		Zm00001d028428	GRMZM2G102483	GRMZM2G170336
Zm00001d034419	GRMZM2G478798	14.792	8.21349	21.3705	2.60188	0.045196	0.323336	Up	0	0.23834	0.213428	0.669771	0	0.476945		GO:0008080	N-acetyltransferase activity											GRMZM2G359986		Zm00001d028429	GRMZM2G102347	GRMZM2G102483
Zm00001d017575	GRMZM2G171852	115.489	64.2139	166.764	2.59701	0.000749268	0.0196259	Up	2.99154	2.83998	3.60123	5.90167	9.50476	8.61075		GO:0003677,GO:0006355	DNA binding|regulation of transcription, DNA-templated											GRMZM2G002542		Zm00001d028430	AC214841.3_FG009	GRMZM2G102347
Zm00001d053695	GRMZM2G026151	43.8007	24.3723	63.2291	2.5943	0.0197866	0.193034	Up	0.643041	0.971047	1.40693	4.50718	1.88002	2.11053		GO:0016021,GO:0005524,GO:0004672,GO:0006468	integral component of membrane|ATP binding|protein kinase activity|protein phosphorylation											AC233853.1_FG003		Zm00001d028432	GRMZM2G089812	AC214841.3_FG009
Zm00001d005097	#N/A	16.1073	8.97163	23.2429	2.59071	0.0330164	0.269301	Up	0.816476	0.494883	0.273189	2.04139	1.31347	1.39616														GRMZM2G091006		na	GRMZM2G472473	GRMZM2G089812
Zm00001d034569	#N/A	43.3215	24.161	62.482	2.58607	0.00111752	0.0259634	Up	1.03342	1.84931	0.567196	3.77264	2.47023	3.11143		GO:0008152,GO:0016758	metabolic process|transferase activity, transferring hexosyl groups											#N/A		Zm00001d028435	GRMZM2G171736	GRMZM2G472473
Zm00001d022561	GRMZM2G113052	196.211	109.462	282.961	2.58502	7.18664e-07	6.19681e-05	Up	6.13067	6.08832	5.65723	14.4524	15.1819	15.2491														GRMZM2G047800		Zm00001d028436	GRMZM2G058910	GRMZM2G171736
Zm00001d032190	GRMZM2G117193	133.498	74.5144	192.482	2.58315	0.000460153	0.0136643	Up	0.679807	0.137505	0.314527	0.936717	0.743136	0.902797		GO:0003677,GO:0006351,GO:0006355,GO:0005634	DNA binding|transcription, DNA-templated|regulation of transcription, DNA-templated|nucleus											GRMZM2G359664		Zm00001d028437	GRMZM2G359879	GRMZM2G058910
Zm00001d017240	GRMZM2G148387	1278.02	713.56	1842.48	2.58209	1.25508e-09	2.32315e-07	Up	20.4699	26.2789	26.5971	81.8025	62.699	55.4815		GO:0009055,GO:0005623,GO:0045454,GO:0015035	electron carrier activity|cell|cell redox homeostasis|protein disulfide oxidoreductase activity											GRMZM5G892700		Zm00001d028438	GRMZM2G058870	GRMZM2G359879
Zm00001d024528	GRMZM2G171229	13.9386	7.7848	20.0924	2.58098	0.0464448	0.327802	Up	0.392693	0.103026	0.128765	0.558322	0.524837	0.417034		GO:0003824,GO:0009058,GO:0016779	catalytic activity|biosynthetic process|nucleotidyltransferase activity											GRMZM2G072052		Zm00001d028439	GRMZM2G355450	GRMZM2G058870
Zm00001d044639	GRMZM2G075884	128.619	71.9183	185.321	2.57682	0.00695787	0.0951026	Up	1.48483	1.09677	2.58715	7.15595	3.58935	3.26082		GO:0016021,GO:0005524,GO:0004672,GO:0030246,GO:0006468	integral component of membrane|ATP binding|protein kinase activity|carbohydrate binding|protein phosphorylation											GRMZM2G100750		Zm00001d028443	GRMZM2G087275	GRMZM2G355450
Zm00001d017992	GRMZM2G179768	55.4926	31.0439	79.9414	2.57511	0.000416978	0.0126667	Up	2.10534	0.780596	1.28341	3.74441	2.89111	4.45403		GO:0008270,GO:0006508,GO:0004222,GO:0031012,GO:0008237	zinc ion binding|proteolysis|metalloendopeptidase activity|extracellular matrix|metallopeptidase activity											GRMZM2G400167		Zm00001d028445	GRMZM2G097788	GRMZM2G087275
Zm00001d025347	GRMZM2G157120	212.618	118.996	306.24	2.57353	4.11619e-07	3.8351e-05	Up	5.52207	3.97019	4.16377	14.2926	17.35	14.0188														GRMZM2G062638		Zm00001d028446	GRMZM2G019260	GRMZM2G097788
Zm00001d018370	GRMZM2G178958	5396.73	3022.57	7770.89	2.57095	2.72406e-10	5.6611e-08	Up	67.567	64.1371	51.4153	180.35	161.566	135.206		GO:0005622,GO:0005737,GO:0006508,GO:0030145,GO:0019538,GO:0004177,GO:0008235	intracellular|cytoplasm|proteolysis|manganese ion binding|protein metabolic process|aminopeptidase activity|metalloexopeptidase activity											AC213857.4_FG003		Zm00001d028447	GRMZM2G019567	GRMZM2G019260
Zm00001d033718	GRMZM2G100650	198.932	111.532	286.333	2.56727	1.00003e-06	8.11867e-05	Up	3.88465	3.87134	4.01023	9.74112	11.3254	8.48349		GO:0005737,GO:0017089,GO:0051861,GO:0046836,GO:0005634	cytoplasm|glycolipid transporter activity|glycolipid binding|glycolipid transport|nucleus											GRMZM2G369481		na	GRMZM5G808271	GRMZM2G019567
Zm00001d016635	GRMZM2G177356	48.5135	27.2068	69.8203	2.56629	0.000958532	0.0234275	Up	1.42358	1.7437	2.21237	6.58614	3.95751	3.74402		GO:0005515	protein binding											AC191071.3_FG001		Zm00001d028450	GRMZM2G138103	GRMZM5G808271
Zm00001d019629	GRMZM2G054803	570.88	320.349	821.41	2.56411	0.000126312	0.00503887	Up	16.3596	17.0873	13.9273	63.7916	39.2371	32.5875		GO:0016765	transferase activity, transferring alkyl or aryl (other than methyl) groups											GRMZM2G031326		Zm00001d028451	GRMZM2G377647	GRMZM2G138103
Zm00001d042371	GRMZM2G080487	544.455	305.675	783.234	2.56231	1.92203e-08	2.66825e-06	Up	16.3326	18.903	28.1869	64.5503	53.1801	46.1663														GRMZM2G373329		Zm00001d028452	GRMZM2G063733	GRMZM2G377647
Zm00001d049625	GRMZM2G089106	62.7821	35.2572	90.307	2.56138	0.00155288	0.0327627	Up	2.567	1.01832	1.50906	3.90617	6.72337	5.76011														GRMZM2G100475		na	GRMZM2G070784	GRMZM2G063733
Zm00001d038049	GRMZM2G137535	423.264	237.793	608.736	2.55994	0.00231241	0.043794	Up	6.51883	8.9714	10.5944	35.2928	15.5787	20.1766		GO:0004553,GO:0005975	hydrolase activity, hydrolyzing O-glycosyl compounds|carbohydrate metabolic process											GRMZM2G447480		na	GRMZM2G123595	GRMZM2G070784
Zm00001d030108	GRMZM2G057466	388.451	218.266	558.637	2.55943	8.30301e-08	9.56569e-06	Up	0.752545	1.73171	1.42908	3.52146	3.34225	2.87171														GRMZM5G831408		Zm00001d028453	GRMZM2G338702	GRMZM2G123595
Zm00001d002172	GRMZM2G122590	30.4847	17.1318	43.8376	2.55884	0.00491915	0.0750559	Up	0.126038	0.0791691	0.132103	0.396468	0.153784	0.201663		GO:0005524,GO:0004672,GO:0048544,GO:0006468	ATP binding|protein kinase activity|recognition of pollen|protein phosphorylation											#N/A		Zm00001d028454	GRMZM2G338691	GRMZM2G338702
Zm00001d011629	GRMZM2G164640	118.244	66.4833	170.005	2.55711	0.0132215	0.147677	Up	1.48404	0.967445	1.19558	5.10365	2.03799	2.27472		GO:0005524,GO:0004672,GO:0006468	ATP binding|protein kinase activity|protein phosphorylation											GRMZM2G082504		Zm00001d028455	AC214040.3_FG009	GRMZM2G338691
Zm00001d012228	GRMZM2G092817	682.176	383.654	980.699	2.55621	0.00274887	0.0491817	Up	7.27684	6.8871	9.24316	17.1454	28.583	16.4734		GO:0016491,GO:0008270,GO:0055114,GO:0006725,GO:0008198,GO:0051213,GO:0016701	oxidoreductase activity|zinc ion binding|oxidation-reduction process|cellular aromatic compound metabolic process|ferrous iron binding|dioxygenase activity|oxidoreductase activity, acting on single donors with incorporation of molecular oxygen											GRMZM2G016150		Zm00001d028456	GRMZM2G060148	AC214040.3_FG009
Zm00001d043839	GRMZM5G863146	77.806	43.7786	111.833	2.55452	0.00179752	0.0364027	Up	3.22947	4.33994	2.05886	8.55875	12.1605	9.42629		GO:0016021	integral component of membrane											GRMZM2G047762		Zm00001d028457	GRMZM2G060138	GRMZM2G060148
Zm00001d034270	GRMZM2G029385	123.175	69.3116	177.038	2.55424	9.23653e-06	0.000563631	Up	2.63084	1.39017	2.98243	8.40089	5.66944	6.01612														GRMZM2G104511		Zm00001d028458	GRMZM2G360429	GRMZM2G060138
Zm00001d044411	GRMZM2G072052	18.2495	10.2724	26.2265	2.5531	0.0298307	0.251137	Up	0.661246	0.623816	0.556496	1.58575	1.70327	0.612232		GO:0005509	calcium ion binding											GRMZM2G397755		Zm00001d028463	GRMZM5G872118	GRMZM2G360429
Zm00001d014463	AC209987.4_FG010	29.7882	16.7751	42.8012	2.55147	0.00777322	0.102529	Up	1.50376	1.10369	2.34538	6.75381	2.95041	4.38195		GO:0016021,GO:0009055	integral component of membrane|electron carrier activity											GRMZM2G129249		na	AC177941.3_FG001	GRMZM5G872118
Zm00001d045839	GRMZM2G400694	35.8106	20.19	51.4311	2.54735	0.0250214	0.224537	Up	0.109261	0.380668	0.49448	1.09799	0.382873	0.646228		GO:0016021,GO:0005524,GO:0004672,GO:0030246,GO:0006468	integral component of membrane|ATP binding|protein kinase activity|carbohydrate binding|protein phosphorylation											#N/A		Zm00001d028465	GRMZM2G174615	AC177941.3_FG001
Zm00001d031366	GRMZM2G050536	134.965	76.1184	193.812	2.54619	0.0329833	0.26911	Up	0.969511	0.854765	1.06111	4.00622	1.44283	1.64653		GO:0016021,GO:0005524,GO:0004672,GO:0030247,GO:0006468	integral component of membrane|ATP binding|protein kinase activity|polysaccharide binding|protein phosphorylation											GRMZM2G114048		Zm00001d028466	AC177941.3_FG006	GRMZM2G174615
Zm00001d007839	GRMZM2G042343	86.1771	48.6053	123.749	2.546	8.27298e-05	0.00350686	Up	0.734848	1.90086	1.65989	4.55592	3.30352	3.09549		GO:0000166,GO:0003676,GO:0019013,GO:0030529	nucleotide binding|nucleic acid binding|viral nucleocapsid|intracellular ribonucleoprotein complex											GRMZM2G105250		Zm00001d028467	GRMZM2G474407	AC177941.3_FG006
Zm00001d009193	GRMZM2G104390	163.58	92.2918	234.869	2.54485	0.000896022	0.022227	Up	2.39741	6.54016	6.82058	15.9508	8.84454	14.5139		GO:0006355,GO:0008270,GO:0003700,GO:0043565	regulation of transcription, DNA-templated|zinc ion binding|transcription factor activity, sequence-specific DNA binding|sequence-specific DNA binding											GRMZM2G016434		Zm00001d028468	GRMZM5G815823	GRMZM2G474407
Zm00001d033539	GRMZM2G075974	133.12	75.1659	191.074	2.54203	6.7503e-05	0.00301807	Up	3.04191	2.68657	5.53958	8.24015	12.1244	10.0805														GRMZM2G040309		Zm00001d028469	GRMZM2G341309	GRMZM5G815823
Zm00001d037619	GRMZM2G108714	68.6826	38.855	98.5101	2.53532	0.000454787	0.0135922	Up	0.743881	1.27146	2.89932	5.14129	3.15637	4.12622		GO:0016747	transferase activity, transferring acyl groups other than amino-acyl groups											GRMZM2G326627		Zm00001d028470	GRMZM2G001814	GRMZM2G341309
Zm00001d024484	AC203341.3_FG003	21.5885	12.218	30.9589	2.53388	0.0184225	0.18385	Up	0.0668291	0.318476	0.042175	0.272088	0.346333	0.404062														GRMZM2G132450		Zm00001d028471	GRMZM2G001696	GRMZM2G001814
Zm00001d048606	GRMZM5G803334	74.3236	42.0867	106.561	2.53193	0.0198534	0.193346	Up	3.42707	1.09369	0.770325	3.44813	4.60168	5.94466		GO:0016021,GO:0004252,GO:0006508	integral component of membrane|serine-type endopeptidase activity|proteolysis											GRMZM2G423643		Zm00001d028472	GRMZM2G001663	GRMZM2G001696
Zm00001d043982	#N/A	721.529	408.648	1034.41	2.5313	0.0101008	0.123709	Up	3.5108	2.77638	0.140856	4.22283	6.75275	4.54662														GRMZM2G106377		Zm00001d028473	GRMZM2G050825	GRMZM2G001663
Zm00001d051419	GRMZM2G073770	59.6754	33.8524	85.4985	2.52563	0.000472862	0.0139078	Up	0.426929	0.251885	0.292754	0.765588	0.850138	0.797786		GO:0016788	hydrolase activity, acting on ester bonds											GRMZM2G130548		Zm00001d028474	GRMZM2G127123	GRMZM2G050825
Zm00001d014341	GRMZM2G150893	171.682	97.4536	245.911	2.52336	0.00139887	0.0305103	Up	0.943829	7.63039	5.62509	15.2662	9.38114	11.621		GO:0046872,GO:0020037,GO:0005576,GO:0042744,GO:0004601,GO:0006979,GO:0055114	metal ion binding|heme binding|extracellular region|hydrogen peroxide catabolic process|peroxidase activity|response to oxidative stress|oxidation-reduction process											GRMZM5G889467		na	GRMZM2G127213	GRMZM2G127123
Zm00001d045021	GRMZM2G127911	455.76	258.82	652.7	2.52183	4.74616e-08	5.72944e-06	Up	2.03271	4.28045	2.6792	9.17296	9.68202	8.02433		GO:0003824	catalytic activity											GRMZM2G309071		Zm00001d028475	GRMZM5G860152	GRMZM2G127213
Zm00001d052673	GRMZM2G422750	1997.51	1135.32	2859.71	2.51886	0.000599199	0.0166368	Up	23.7383	26.3295	55.3776	122.723	88.7091	67.0998	Chalcone synthase C2 [Source:Uniprot/SWISSPROT;Acc:P24825]	GO:0003824,GO:0008152,GO:0016746,GO:0016747,GO:0009058	catalytic activity|metabolic process|transferase activity, transferring acyl groups|transferase activity, transferring acyl groups other than amino-acyl groups|biosynthetic process											GRMZM2G150448		na	GRMZM5G899202	GRMZM5G860152
Zm00001d027734	GRMZM2G076423	3564.18	2025.83	5102.53	2.51873	3.92857e-07	3.68502e-05	Up	22.4728	28.4011	27.5198	53.7017	69.0298	70.8763		GO:0005524,GO:0004672,GO:0006468,GO:0004674	ATP binding|protein kinase activity|protein phosphorylation|protein serine/threonine kinase activity											#N/A		Zm00001d028477	GRMZM2G164562	GRMZM5G899202
Zm00001d013751	GRMZM2G087326	624.529	355.359	893.699	2.51492	0.0175335	0.177865	Up	2.16721	2.03287	3.14267	9.87341	3.3794	4.67019		GO:0030244,GO:0016866	cellulose biosynthetic process|intramolecular transferase activity											GRMZM2G362298		na	GRMZM2G025726	GRMZM2G164562
Zm00001d014090	GRMZM2G111477	698.482	397.521	999.444	2.51419	0.0265634	0.232954	Up	4.94514	5.76787	7.02415	25.2682	9.67163	10.1483	Chaperonin CPN60-1, mitochondrial [Source:Uniprot/SWISSPROT;Acc:P29185]	GO:0005524,GO:0005737,GO:0005759,GO:0006457,GO:0042026,GO:0051117	ATP binding|cytoplasm|mitochondrial matrix|protein folding|protein refolding|ATPase binding											GRMZM2G065888		Zm00001d028481	GRMZM2G030422	GRMZM2G025726
Zm00001d044534	GRMZM2G151319	40.234	22.9148	57.5532	2.51161	0.00348923	0.0587499	Up	0.396054	1.14887	0.736116	1.91833	3.05135	1.854														GRMZM2G051528		Zm00001d028482	GRMZM2G030223	GRMZM2G030422
Zm00001d044768	GRMZM2G057611	508.101	289.414	726.788	2.51124	0.0177791	0.179474	Up	10.1208	5.17152	4.34044	10.015	20.6947	18.5809		GO:0016021,GO:0006810,GO:0016020,GO:0005215	integral component of membrane|transport|membrane|transporter activity											GRMZM2G318375		na	GRMZM2G332705	GRMZM2G030223
Zm00001d006034	GRMZM2G159926	257.767	146.859	368.674	2.5104	4.96232e-07	4.48791e-05	Up	1.2398	1.9335	1.66482	5.07697	4.59831	4.15376		GO:0003677	DNA binding											GRMZM2G036409		Zm00001d028483	AC205100.3_FG001	GRMZM2G332705
Zm00001d014906	GRMZM2G137435	115.711	65.9246	165.497	2.5104	0.00165171	0.0342135	Up	0.749159	0.579838	0.653414	2.27564	0.948501	1.20847		GO:0005622,GO:0016042,GO:0006629,GO:0007165,GO:0008081,GO:0035556,GO:0004435,GO:0004871,GO:0005515	intracellular|lipid catabolic process|lipid metabolic process|signal transduction|phosphoric diester hydrolase activity|intracellular signal transduction|phosphatidylinositol phospholipase C activity|signal transducer activity|protein binding											GRMZM2G338161		Zm00001d028484	GRMZM2G136513	AC205100.3_FG001
Zm00001d030851	GRMZM2G132450	20.5617	11.7169	29.4066	2.50976	0.0213443	0.202538	Up	0.675963	0.26126	0.428305	1.43472	0.940038	1.24175		GO:0016021,GO:0020037,GO:0005506,GO:0016705,GO:0004497,GO:0055114	integral component of membrane|heme binding|iron ion binding|oxidoreductase activity, acting on paired donors, with incorporation or reduction of molecular oxygen|monooxygenase activity|oxidation-reduction process											GRMZM2G443843		Zm00001d028484	GRMZM5G884151	GRMZM2G136513
Zm00001d037354	GRMZM2G174315	56.053	31.9485	80.1575	2.50896	0.00522079	0.0779749	Up	0.279922	0.458307	0.872441	1.96278	1.10332	0.84278		GO:0016021,GO:0005886,GO:0016042,GO:0016787,GO:0006629	integral component of membrane|plasma membrane|lipid catabolic process|hydrolase activity|lipid metabolic process											GRMZM2G147256		Zm00001d028485	GRMZM2G174236	GRMZM5G884151
Zm00001d018394	GRMZM2G180430	888.711	506.562	1270.86	2.5088	1.01704e-05	0.000609896	Up	10.0245	4.57097	7.34284	20.1828	22.8828	14.9999		GO:0004722,GO:0003824,GO:0006470	protein serine/threonine phosphatase activity|catalytic activity|protein dephosphorylation											#N/A		Zm00001d028486	GRMZM2G352678	GRMZM2G174236
Zm00001d002261	GRMZM5G853854	195.534	111.5	279.568	2.50735	0.0170154	0.174137	Up	1.65336	1.42809	1.79391	6.41633	2.36391	2.81505		GO:0016491,GO:0003824,GO:0010181,GO:0055114	oxidoreductase activity|catalytic activity|FMN binding|oxidation-reduction process											GRMZM2G063024		Zm00001d028489	GRMZM2G052728	GRMZM2G352678
Zm00001d048843	GRMZM2G574887	50.2267	28.7168	71.7365	2.49807	0.0009497	0.0232558	Up	1.57582	1.64097	0.901549	4.43733	3.24241	3.39241		GO:0005515	protein binding											GRMZM2G092169		Zm00001d028490	GRMZM2G372398	GRMZM2G052728
Zm00001d032608	GRMZM2G095126	819.153	468.377	1169.93	2.49783	0.00109415	0.0256296	Up	17.8479	6.64061	9.69878	39.4709	25.6458	24.2406		GO:0004553,GO:0005975,GO:0003824	hydrolase activity, hydrolyzing O-glycosyl compounds|carbohydrate metabolic process|catalytic activity											GRMZM2G304897		Zm00001d028493	GRMZM5G840610	GRMZM2G372398
Zm00001d031321	GRMZM2G326627	41.4853	23.7429	59.2277	2.49455	0.00272479	0.0489351	Up	0.763137	0.296222	0.832721	1.44572	1.97881	1.5902														GRMZM2G360219		Zm00001d028493	GRMZM5G884432	GRMZM5G840610
Zm00001d050409	GRMZM2G068455	602.049	344.698	859.4	2.49319	0.025973	0.229955	Up	8.61824	8.89716	12.5467	44.8294	18.5063	17.3966		GO:0016491,GO:0005975,GO:0003824,GO:0006099,GO:0055114,GO:0016616,GO:0006108,GO:0030060,GO:0019752,GO:0016615	oxidoreductase activity|carbohydrate metabolic process|catalytic activity|tricarboxylic acid cycle|oxidation-reduction process|oxidoreductase activity, acting on the CH-OH group of donors, NAD or NADP as acceptor|malate metabolic process|L-malate dehydrogenase activity|carboxylic acid metabolic process|malate dehydrogenase activity											GRMZM2G043254		Zm00001d028494	AC209675.3_FG001	GRMZM5G884432
Zm00001d051085	GRMZM2G071396	1686.92	966.788	2407.05	2.48974	0.0113759	0.133949	Up	15.3825	11.65	10.5311	49.2301	19.4571	22.8891		GO:0005524,GO:0004672,GO:0006468,GO:0005515	ATP binding|protein kinase activity|protein phosphorylation|protein binding											GRMZM2G464157		Zm00001d028495	GRMZM2G150827	AC209675.3_FG001
Zm00001d014317	GRMZM2G094543	1273.65	730.163	1817.13	2.48867	5.56166e-09	8.77384e-07	Up	84.4818	88.8024	80.5281	241.197	233.981	183.97														GRMZM2G061303		Zm00001d028497	GRMZM2G072492	GRMZM2G150827
Zm00001d002713	GRMZM2G071253	24.3088	13.9431	34.6746	2.48687	0.0143016	0.15556	Up	0.631019	0.494788	0.307523	1.22137	1.25508	1.00446		GO:0003676,GO:0008270	nucleic acid binding|zinc ion binding											GRMZM6G183316		na	AC217351.3_FG010	GRMZM2G072492
Zm00001d014813	GRMZM2G128938	54.1858	31.0936	77.2779	2.48533	0.000929869	0.0229084	Up	0.0940548	0.0886649	0.0992075	0.294037	0.247429	0.249181		GO:0004674,GO:0016301,GO:0005515,GO:0005488	protein serine/threonine kinase activity|kinase activity|protein binding|binding											GRMZM2G000014		Zm00001d028498	GRMZM2G072456	AC217351.3_FG010
Zm00001d000204	#N/A	171.604	98.4808	244.728	2.48503	0.00907313	0.114456	Up	2.16354	1.87005	3.60817	10.1648	4.87046	5.08202		GO:0016021,GO:0016020,GO:0055085,GO:0008271,GO:0008272,GO:0015116,GO:1902358,GO:0009506	integral component of membrane|membrane|transmembrane transport|secondary active sulfate transmembrane transporter activity|sulfate transport|sulfate transmembrane transporter activity|sulfate transmembrane transport|plasmodesma											GRMZM2G060148		Zm00001d028500	GRMZM2G372509	GRMZM2G072456
Zm00001d053819	GRMZM2G028980	127.725	73.3421	182.108	2.48299	1.68647e-05	0.00094026	Up	0.61574	0.663224	0.521246	1.30756	1.74311	1.43558		GO:0003677,GO:0006351,GO:0006355,GO:0005634,GO:0009734,GO:0009725,GO:0005515	DNA binding|transcription, DNA-templated|regulation of transcription, DNA-templated|nucleus|auxin-activated signaling pathway|response to hormone|protein binding											#N/A		Zm00001d028502	GRMZM2G372502	GRMZM2G372509
Zm00001d049330	GRMZM2G174449	34.5781	19.856	49.3001	2.48288	0.0169126	0.173555	Up	1.21539	0.425718	1.06252	3.4298	1.25397	2.0839		GO:0016021	integral component of membrane											GRMZM2G442387		Zm00001d028503	GRMZM2G372495	GRMZM2G372502
Zm00001d002876	GRMZM2G124371	98.0495	56.3199	139.779	2.48188	5.09738e-05	0.00241105	Up	0.365501	0.430522	0.296017	1.14091	1.06071	0.863779		GO:0046872	metal ion binding											GRMZM2G068059		Zm00001d028504	GRMZM2G072342	GRMZM2G372495
Zm00001d052744	GRMZM2G116629	83.114	47.7441	118.484	2.48165	0.0385656	0.294411	Up	2.16408	1.68193	1.69845	8.33039	3.40956	3.06226		GO:0016021	integral component of membrane											GRMZM2G425798		Zm00001d028504	GRMZM2G072376	GRMZM2G072342
Zm00001d034434	GRMZM2G448927	78.8644	45.384	112.345	2.47543	0.0380508	0.291926	Up	0.259016	0.441613	0.00997905	1.07262	0.388088	0.585552		GO:0005634,GO:0004402,GO:0016573,GO:0000123,GO:0006348,GO:0042393	nucleus|histone acetyltransferase activity|histone acetylation|histone acetyltransferase complex|chromatin silencing at telomere|histone binding											GRMZM2G028980		Zm00001d028505	GRMZM2G105362	GRMZM2G072376
Zm00001d039893	GRMZM2G020772	289.551	166.674	412.427	2.47445	3.24547e-07	3.12884e-05	Up	3.07983	2.37805	2.64764	8.11515	7.16775	5.6852		GO:0003677,GO:0006351,GO:0006355,GO:0005634	DNA binding|transcription, DNA-templated|regulation of transcription, DNA-templated|nucleus											GRMZM2G316904		Zm00001d028507	GRMZM2G339344	GRMZM2G105362
Zm00001d019752	GRMZM2G318299	45.7828	26.3569	65.2088	2.47407	0.00205307	0.040261	Up	0.591038	0.295842	1.10577	2.24583	1.42005	1.30144														GRMZM2G427618		Zm00001d028509	GRMZM2G703555	GRMZM2G339344
Zm00001d045785	GRMZM2G027958	68.7393	39.5921	97.8864	2.47237	0.0337111	0.272328	Up	0.939821	0.585712	2.85443	6.41138	2.37247	3.39271		GO:0016021,GO:0005886,GO:0005524,GO:0004672,GO:0004674,GO:0004713,GO:0006468,GO:0031349,GO:0010942	integral component of membrane|plasma membrane|ATP binding|protein kinase activity|protein serine/threonine kinase activity|protein tyrosine kinase activity|protein phosphorylation|positive regulation of defense response|positive regulation of cell death											GRMZM2G065617		Zm00001d028510	GRMZM5G883632	GRMZM2G703555
Zm00001d003593	GRMZM2G082149	78.6024	45.2807	111.924	2.47178	0.000220404	0.00774621	Up	4.54676	3.88216	4.80071	10.5438	10.0305	5.09355														GRMZM2G391288		Zm00001d028511	GRMZM2G408305	GRMZM5G883632
Zm00001d030683	GRMZM2G171713	16.8641	9.72486	24.0034	2.46825	0.0350875	0.278954	Up	0.200897	0.673166	0.0885777	1.01431	0.51383	0.641063		GO:0005515	protein binding											GRMZM2G010452		Zm00001d028512	GRMZM2G073591	GRMZM2G408305
Zm00001d038268	AC235543.1_FG002	47.8411	27.6279	68.0543	2.46324	0.00141059	0.0306695	Up	0.907478	0.785896	1.0753	3.25296	1.9893	2.04521		GO:0016021,GO:0055085	integral component of membrane|transmembrane transport											GRMZM5G804618		Zm00001d028513	GRMZM2G143655	GRMZM2G073591
Zm00001d027581	GRMZM2G018579	2724.67	1576.76	3872.58	2.45603	1.55364e-05	0.000876766	Up	101.973	84.5516	111.703	339.164	195.918	212.034		GO:0016021,GO:0005886	integral component of membrane|plasma membrane											AC212835.3_FG008		Zm00001d028514	GRMZM2G066120	GRMZM2G143655
Zm00001d010800	GRMZM2G093404	105.474	61.1311	149.817	2.45076	0.0497071	0.343142	Up	0.817439	0.996886	1.19429	2.58182	4.91278	2.65023		GO:0046872	metal ion binding											GRMZM2G147245		na	GRMZM2G475247	GRMZM2G066120
Zm00001d034594	GRMZM2G087753	23.8331	13.8142	33.8519	2.45051	0.0150032	0.160279	Up	0.128478	0.15848	0.08312	0.370686	0.162368	0.244484														GRMZM2G044677		na	AC215240.3_FG003	GRMZM2G475247
Zm00001d017831	GRMZM2G421899	97.1721	56.3698	137.974	2.44766	0.00677948	0.0934155	Up	0.309855	0.768111	1.2944	1.78761	1.54893	2.19522		GO:0003677	DNA binding											GRMZM2G324999		Zm00001d028515	GRMZM2G048703	AC215240.3_FG003
Zm00001d003044	GRMZM5G845736	402.879	233.76	571.998	2.44695	0.0379458	0.291432	Up	2.69453	1.69412	3.22954	11.0768	4.92293	3.20528		GO:0004553,GO:0005975	hydrolase activity, hydrolyzing O-glycosyl compounds|carbohydrate metabolic process											GRMZM2G018984		na	GRMZM2G014323	GRMZM2G048703
Zm00001d015127	GRMZM2G524937	149.063	86.4909	211.635	2.4469	6.03953e-05	0.00275349	Up	3.53179	6.51779	9.65819	21.4539	12.6425	14.1101		GO:0005515	protein binding											GRMZM2G046894		Zm00001d028522	GRMZM2G014419	GRMZM2G014323
Zm00001d011845	GRMZM2G128466	890.137	516.514	1263.76	2.44671	0.000160587	0.00604359	Up	22.7814	42.6626	61.3538	95.5221	113.306	96.8767		GO:0016491	oxidoreductase activity											AC185466.3_FG001		Zm00001d028524	GRMZM2G015281	GRMZM2G014419
Zm00001d013752	#N/A	53.4078	31.0123	75.8032	2.4443	0.000766989	0.0200334	Up	1.70797	0.956314	0.942651	3.66753	2.69134	2.13173		GO:0005515	protein binding											GRMZM2G160325		na	AC226346.2_FG004	GRMZM2G015281
Zm00001d010255	#N/A	66.7779	38.7873	94.7684	2.44329	0.0138187	0.152109	Up	1.06965	0.588236	0.944923	3.29186	1.47727	1.30388		GO:0016491,GO:0007264,GO:0015031,GO:0005093,GO:0055114,GO:0005092	oxidoreductase activity|small GTPase mediated signal transduction|protein transport|Rab GDP-dissociation inhibitor activity|oxidation-reduction process|GDP-dissociation inhibitor activity											GRMZM2G014022		Zm00001d028526	GRMZM2G055263	AC226346.2_FG004
Zm00001d038218	GRMZM2G070199	1446.61	840.361	2052.87	2.44284	8.38296e-09	1.26496e-06	Up	4.08214	2.64881	3.11216	6.48976	9.56307	8.27521		GO:0020037,GO:0009055,GO:0046872,GO:0005739,GO:0070469,GO:0055114	heme binding|electron carrier activity|metal ion binding|mitochondrion|respiratory chain|oxidation-reduction process											GRMZM2G101741		Zm00001d028527	GRMZM2G418575	GRMZM2G055263
Zm00001d000434	#N/A	111.248	64.6518	157.844	2.44145	7.86921e-05	0.0033562	Up	2.38527	2.93016	3.59841	10.5898	5.43076	5.97108		GO:0016021,GO:0006810,GO:0016020,GO:0005215,GO:0055085,GO:0005345,GO:0006863,GO:0015854,GO:0015853	integral component of membrane|transport|membrane|transporter activity|transmembrane transport|purine nucleobase transmembrane transporter activity|purine nucleobase transport|guanine transport|adenine transport											GRMZM2G001631		Zm00001d028528	GRMZM2G118208	GRMZM2G418575
Zm00001d013777	GRMZM2G087233	2093.83	1217.54	2970.11	2.43943	1.963e-08	2.69815e-06	Up	12.7272	14.749	15.2223	32.5497	40.1083	29.698		GO:0003735,GO:0006412,GO:0005840,GO:0003677,GO:0005622	structural constituent of ribosome|translation|ribosome|DNA binding|intracellular											GRMZM2G160506		Zm00001d028529	GRMZM2G100620	GRMZM2G118208
Zm00001d052040	GRMZM2G010933	187.461	109.062	265.86	2.43769	4.14622e-06	0.000276806	Up	7.03032	10.6573	8.15087	20.9767	18.8917	15.439		GO:0005507,GO:0005758,GO:0016531,GO:0006825	copper ion binding|mitochondrial intermembrane space|copper chaperone activity|copper ion transport											GRMZM2G071253		Zm00001d028531	GRMZM2G151582	GRMZM2G100620
Zm00001d045322	GRMZM2G028552	769.124	447.487	1090.76	2.43753	4.15208e-08	5.16962e-06	Up	14.3579	16.8145	15.0723	34.9789	41.5308	36.0722		GO:0031314,GO:0008425,GO:0006744,GO:0010420,GO:0061542	extrinsic component of mitochondrial inner membrane|2-polyprenyl-6-methoxy-1,4-benzoquinone methyltransferase activity|ubiquinone biosynthetic process|polyprenyldihydroxybenzoate methyltransferase activity|3-demethylubiquinone-n 3-O-methyltransferase activity											GRMZM2G141376		Zm00001d028532	GRMZM2G151576	GRMZM2G151582
Zm00001d025680	GRMZM2G065292	195.489	113.803	277.174	2.43555	4.97499e-06	0.000328882	Up	1.9647	2.78536	2.66747	5.57284	6.10229	6.51319		GO:0006629,GO:0008081,GO:0005886,GO:0046658	lipid metabolic process|phosphoric diester hydrolase activity|plasma membrane|anchored component of plasma membrane											AC207043.3_FG002		Zm00001d028533	GRMZM2G151564	GRMZM2G151576
Zm00001d022517	GRMZM2G181605	76.3273	44.434	108.221	2.43553	0.000351468	0.0111145	Up	1.23266	1.7924	1.54057	3.01003	3.82514	4.565		GO:0003677,GO:0006351,GO:0006355,GO:0005634	DNA binding|transcription, DNA-templated|regulation of transcription, DNA-templated|nucleus											GRMZM2G378852		Zm00001d028534	GRMZM2G151521	GRMZM2G151564
Zm00001d003508	GRMZM2G015844	52.9571	30.8873	75.027	2.42905	0.00132307	0.0291779	Up	0.516845	0.830572	0.664404	2.51615	1.45132	1.19835														GRMZM2G095786		Zm00001d028535	GRMZM2G161452	GRMZM2G151521
Zm00001d030285	GRMZM2G015143	964.502	562.556	1366.45	2.429	3.39024e-08	4.33779e-06	Up	1.9702	4.33725	4.4499	10.5686	7.69146	7.75651		GO:0004553,GO:0005975,GO:0003824,GO:0008270,GO:0030246,GO:0004559,GO:0006013,GO:0015923	hydrolase activity, hydrolyzing O-glycosyl compounds|carbohydrate metabolic process|catalytic activity|zinc ion binding|carbohydrate binding|alpha-mannosidase activity|mannose metabolic process|mannosidase activity											GRMZM2G303909		Zm00001d028536	GRMZM2G161337	GRMZM2G161452
Zm00001d043845	GRMZM2G085078	1816.13	1059.52	2572.75	2.42823	9.76329e-09	1.42334e-06	Up	2.53262	2.79994	2.695	6.80751	6.71051	5.43993		GO:0016491,GO:0003824,GO:0008152,GO:0051536,GO:0055114,GO:0006537,GO:0016639,GO:0015930,GO:0016638,GO:0006807,GO:0005506,GO:0050660,GO:0010181,GO:0016040,GO:0045181	oxidoreductase activity|catalytic activity|metabolic process|iron-sulfur cluster binding|oxidation-reduction process|glutamate biosynthetic process|oxidoreductase activity, acting on the CH-NH2 group of donors, NAD or NADP as acceptor|glutamate synthase activity|oxidoreductase activity, acting on the CH-NH2 group of donors|nitrogen compound metabolic process|iron ion binding|flavin adenine dinucl…											GRMZM2G123940		Zm00001d028537	GRMZM2G093305	GRMZM2G161337
Zm00001d053953	GRMZM2G027640	264.031	154.157	373.905	2.42548	0.000415789	0.0126445	Up	5.23606	7.99775	8.8591	27.2108	12.9912	16.035														GRMZM2G101754		Zm00001d028538	GRMZM2G093217	GRMZM2G093305
Zm00001d027532	GRMZM2G110345	268.396	156.747	380.046	2.42459	0.000586655	0.0163539	Up	0.498569	0.273232	0.234944	1.0824	0.664146	0.528846														GRMZM2G053503		Zm00001d028539	GRMZM2G049190	GRMZM2G093217
Zm00001d017121	GRMZM2G176307	358.704	209.641	507.768	2.42209	0.0268716	0.234031	Up	4.96108	3.63222	5.12249	18.7192	7.56567	7.62391		GO:0055114,GO:0016620,GO:0051287,GO:0050661,GO:0006006	oxidation-reduction process|oxidoreductase activity, acting on the aldehyde or oxo group of donors, NAD or NADP as acceptor|NAD binding|NADP binding|glucose metabolic process											GRMZM2G320786		Zm00001d028540	GRMZM2G049041	GRMZM2G049190
Zm00001d015088	GRMZM2G370852	3098.62	1811.22	4386.02	2.42158	4.853e-09	7.87461e-07	Up	37.9884	41.5201	42.7316	123.35	89.7257	84.5236		GO:0051539,GO:0008652,GO:0016836,GO:0008152	4 iron, 4 sulfur cluster binding|cellular amino acid biosynthetic process|hydro-lyase activity|metabolic process											GRMZM2G003409		Zm00001d028541	GRMZM2G397002	GRMZM2G049041
Zm00001d043735	GRMZM6G056015	803.727	470.284	1137.17	2.41805	2.05473e-05	0.00110991	Up	36.1495	33.3628	17.2633	64.0109	78.4137	72.8719		GO:0016021,GO:0005886,GO:0008643	integral component of membrane|plasma membrane|carbohydrate transport											GRMZM2G355846		Zm00001d028542	GRMZM2G540403	GRMZM2G397002
Zm00001d017777	GRMZM2G101287	500.898	293.182	708.614	2.41697	1.78226e-07	1.86211e-05	Up	2.18264	1.10432	2.93859	4.18717	4.3634	3.67658		GO:0006950	response to stress											GRMZM2G124371		Zm00001d028543	GRMZM2G079112	GRMZM2G540403
Zm00001d041719	GRMZM2G047434	1027.3	601.603	1453	2.41521	0.025611	0.227986	Up	6.86111	5.89683	8.79171	28.7403	11.5662	11.4118		GO:0005524,GO:0006457,GO:0006950,GO:0051082	ATP binding|protein folding|response to stress|unfolded protein binding											GRMZM2G332107		Zm00001d028546	GRMZM2G012319	GRMZM2G079112
Zm00001d018872	GRMZM2G443668	4134.81	2422.15	5847.48	2.41417	4.19276e-05	0.00202808	Up	12.331	12.7561	10.1161	24.7068	34.3712	23.1989		GO:0005515	protein binding											GRMZM2G027198		Zm00001d028547	AC217897.3_FG010	GRMZM2G012319
Zm00001d043088	GRMZM2G021589	148.237	86.8473	209.627	2.41374	1.49028e-05	0.000849641	Up	1.36899	2.11831	0.469495	3.93977	3.30299	2.81951		GO:0016021	integral component of membrane											GRMZM2G305446		Zm00001d028548	GRMZM2G012566	AC217897.3_FG010
Zm00001d038178	AC209636.2_FG003	25.7562	15.0903	36.4221	2.41362	0.0432017	0.313922	Up	0.773309	1.48354	0.753639	3.26112	0.638154	2.65439		GO:0008152,GO:0016787	metabolic process|hydrolase activity											GRMZM2G115635		Zm00001d028549	GRMZM2G128444	GRMZM2G012566
Zm00001d037797	GRMZM2G339091	409.985	240.216	579.755	2.41348	1.22149e-07	1.32999e-05	Up	7.57666	6.04469	4.83833	18.7247	11.6855	13.9316		GO:0006508,GO:0004185	proteolysis|serine-type carboxypeptidase activity											GRMZM2G162098		Zm00001d028550	GRMZM2G128206	GRMZM2G128444
Zm00001d007754	GRMZM2G092284	206.238	120.887	291.588	2.41207	0.0339691	0.273854	Up	1.69166	1.9935	3.13502	9.25257	2.91804	4.19358														GRMZM2G480439		Zm00001d028552	GRMZM2G128156	GRMZM2G128206
Zm00001d043870	GRMZM2G423202	297.723	174.545	420.901	2.41141	6.2804e-07	5.5008e-05	Up	2.87496	3.11104	3.54134	10.2443	6.68265	6.05669		GO:0016021	integral component of membrane											GRMZM2G439903		na	GRMZM2G426271	GRMZM2G128156
Zm00001d036280	AC195587.4_FG004	292.402	171.444	413.36	2.41105	8.24493e-07	6.8952e-05	Up	0.493278	1.15968	0.673758	1.94797	1.54462	1.71715		GO:0043531	ADP binding											GRMZM2G061527		Zm00001d028554	GRMZM2G481529	GRMZM2G426271
Zm00001d053369	GRMZM2G038158	18.31	10.7445	25.8755	2.40827	0.0419307	0.309382	Up	0.262779	0.462733	0.459501	1.10212	0.651312	0.770953		GO:0006355,GO:0003700,GO:0043565	regulation of transcription, DNA-templated|transcription factor activity, sequence-specific DNA binding|sequence-specific DNA binding											GRMZM2G075563		Zm00001d028555	AC208204.3_FG006	GRMZM2G481529
Zm00001d048770	GRMZM2G039630	36.668	21.5235	51.8124	2.40725	0.00501314	0.0760185	Up	2.83143	4.17889	1.45739	6.72047	6.65116	7.92755		GO:0005783	endoplasmic reticulum											GRMZM2G159353		Zm00001d028556	GRMZM2G046679	AC208204.3_FG006
Zm00001d013943	GRMZM2G073034	103.95	61.077	146.823	2.4039	5.87691e-05	0.00269262	Up	4.26187	2.91744	2.50625	7.79642	6.82658	7.14185														GRMZM2G042323		Zm00001d028557	GRMZM2G046382	GRMZM2G046679
Zm00001d021492	GRMZM2G028713	21.0386	12.3655	29.7117	2.40279	0.0293346	0.248258	Up	0.0466989	0.0951337	0.116568	0.297094	0.148454	0.151334		GO:0043531	ADP binding											AC233851.1_FG009		Zm00001d028558	GRMZM2G046274	GRMZM2G046382
Zm00001d049597	GRMZM2G145972	1017.99	598.515	1437.46	2.40171	2.8772e-08	3.82227e-06	Up	4.14149	4.80659	3.61378	10.5432	10.3175	8.29311		GO:0016491,GO:0005509,GO:0055114	oxidoreductase activity|calcium ion binding|oxidation-reduction process											GRMZM2G015753		Zm00001d028560	GRMZM5G886952	GRMZM2G046274
Zm00001d043238	GRMZM2G321839	71.5037	42.0771	100.93	2.3987	0.00171928	0.0352131	Up	0.860771	1.41326	0.711939	3.66288	1.73537	2.32728		GO:0020037,GO:0004601,GO:0006979,GO:0055114,GO:0046872,GO:0005576,GO:0042744	heme binding|peroxidase activity|response to oxidative stress|oxidation-reduction process|metal ion binding|extracellular region|hydrogen peroxide catabolic process											GRMZM2G007289		Zm00001d028561	GRMZM2G306679	GRMZM5G886952
Zm00001d034388	GRMZM2G141473	10737.4	6320.65	15154.2	2.39757	0.0205216	0.197293	Up	30.4829	36.7273	34.9593	48.2647	108.245	79.7997		GO:0046872,GO:0016491,GO:0005506,GO:0009055,GO:0003824,GO:0050660,GO:0016614,GO:0051537,GO:0051536,GO:0055114	metal ion binding|oxidoreductase activity|iron ion binding|electron carrier activity|catalytic activity|flavin adenine dinucleotide binding|oxidoreductase activity, acting on CH-OH group of donors|2 iron, 2 sulfur cluster binding|iron-sulfur cluster binding|oxidation-reduction process											GRMZM2G008287		Zm00001d028562	GRMZM2G306732	GRMZM2G306679
Zm00001d043166	GRMZM2G004858	88.5878	52.1938	124.982	2.39457	0.00715551	0.0968663	Up	2.0935	0.827185	1.011	4.77129	2.42921	2.28109		GO:0008152,GO:0016758	metabolic process|transferase activity, transferring hexosyl groups											GRMZM2G038158		Zm00001d028564	AC204035.3_FG003	GRMZM2G306732
Zm00001d023941	GRMZM2G102683	342.208	202.4	482.017	2.38151	0.0025695	0.0471291	Up	3.52397	18.1356	7.69984	25.3122	25.0237	21.6024		GO:0016021,GO:0016020,GO:0005215,GO:0055085,GO:0022891,GO:0022857	integral component of membrane|membrane|transporter activity|transmembrane transport|substrate-specific transmembrane transporter activity|transmembrane transporter activity											GRMZM2G122577		Zm00001d028565	GRMZM2G007055	AC204035.3_FG003
Zm00001d048233	GRMZM2G095786	33.1237	19.6083	46.6391	2.37854	0.0104501	0.126481	Up	0.320915	0.784705	0.497083	1.19147	1.53704	1.09214		GO:0005515	protein binding											GRMZM2G400694		Zm00001d028566	GRMZM2G306806	GRMZM2G007055
Zm00001d017271	GRMZM2G540538	1660.72	983.298	2338.14	2.37786	0.000316994	0.0102222	Up	3.14209	2.93737	4.78266	10.3931	5.80956	6.10539		GO:0016773,GO:0004001,GO:0006166	phosphotransferase activity, alcohol group as acceptor|adenosine kinase activity|purine ribonucleoside salvage											GRMZM2G104299		Zm00001d028567	GRMZM2G160198	GRMZM2G306806
Zm00001d040173	AC226235.2_FG001	583.989	345.804	822.174	2.37757	1.12404e-07	1.2287e-05	Up	18.7435	15.8956	17.6267	54.9472	40.4055	34.5294														GRMZM2G110345		Zm00001d028568	GRMZM2G160237	GRMZM2G160198
Zm00001d034617	GRMZM2G151967	500.797	296.574	705.02	2.37721	1.75878e-07	1.84971e-05	Up	2.68038	5.18089	2.54666	8.40874	7.67685	6.94229		GO:0003993,GO:0016791,GO:0005783,GO:0005774	acid phosphatase activity|phosphatase activity|endoplasmic reticulum|vacuolar membrane											GRMZM2G041729		Zm00001d028569	GRMZM2G160324	GRMZM2G160237
Zm00001d021360	GRMZM2G046186	502.804	298.114	707.495	2.37324	1.39304e-07	1.50497e-05	Up	33.0349	23.9042	16.9402	56.1626	60.6176	61.6876		GO:0009570,GO:0009507,GO:0005739,GO:0010150,GO:0051537,GO:0043231,GO:0072593,GO:0055072	chloroplast stroma|chloroplast|mitochondrion|leaf senescence|2 iron, 2 sulfur cluster binding|intracellular membrane-bounded organelle|reactive oxygen species metabolic process|iron ion homeostasis											GRMZM2G009353		Zm00001d028570	GRMZM2G160428	GRMZM2G160324
Zm00001d035717	GRMZM2G102737	1585.44	940.73	2230.16	2.37066	4.81086e-07	4.37946e-05	Up	42.6151	28.6488	25.3754	99.2522	70.4206	65.4383		GO:0016021,GO:0016020,GO:0022857	integral component of membrane|membrane|transmembrane transporter activity											GRMZM2G047167		Zm00001d028571	GRMZM2G160452	GRMZM2G160428
Zm00001d037367	GRMZM2G104511	76.8953	45.6748	108.116	2.36707	0.000699717	0.018591	Up	0.382427	0.607413	1.2005	1.4789	1.71152	1.64192														GRMZM2G178817		Zm00001d028572	GRMZM2G160506	GRMZM2G160452
Zm00001d017208	GRMZM2G097015	53.3277	31.7062	74.9493	2.36387	0.00138648	0.0303002	Up	2.35227	2.70526	2.78801	9.08258	4.2127	4.66946														GRMZM2G352359		Zm00001d028576	GRMZM2G061202	GRMZM2G160506
Zm00001d019358	GRMZM2G103617	574.7	342.057	807.344	2.36026	1.74593e-07	1.84319e-05	Up	26.2015	27.4616	31.2188	82.4464	66.397	59.2704														GRMZM2G448927		Zm00001d028577	GRMZM2G119168	GRMZM2G061202
Zm00001d003287	GRMZM2G163494	32.1037	19.1227	45.0847	2.35766	0.00960091	0.119377	Up	1.43422	1.60146	1.32218	5.0805	3.24671	4.37417		GO:0016021,GO:0010167,GO:0015706	integral component of membrane|response to nitrate|nitrate transport											GRMZM2G373554		Zm00001d028578	GRMZM2G356459	GRMZM2G119168
Zm00001d047358	GRMZM2G149273	172.639	102.899	242.379	2.3555	0.0263471	0.231737	Up	8.10311	4.48138	5.1212	23.4884	8.38363	12.6301		GO:0046872,GO:0020037,GO:0005576,GO:0042744,GO:0004601,GO:0006979,GO:0055114	metal ion binding|heme binding|extracellular region|hydrogen peroxide catabolic process|peroxidase activity|response to oxidative stress|oxidation-reduction process											GRMZM2G313750		na	AC207104.3_FG001	GRMZM2G356459
Zm00001d049179	#N/A	2215.45	1321.3	3109.6	2.35345	0.0159602	0.167205	Up	25.5454	107.743	23.692	121.321	141.117	107.71		GO:0008168,GO:0008171	methyltransferase activity|O-methyltransferase activity											GRMZM2G069422		Zm00001d028579	GRMZM2G057646	AC207104.3_FG001
Zm00001d034726	GRMZM5G840909	124.778	74.5426	175.013	2.34783	5.27344e-05	0.00247745	Up	3.62768	2.29095	4.1525	10.8244	6.32317	6.55769		GO:0003824,GO:0008270,GO:0016787	catalytic activity|zinc ion binding|hydrolase activity											GRMZM2G095280		Zm00001d028582	GRMZM2G441511	GRMZM2G057646
Zm00001d051664	GRMZM2G072612	391.065	233.737	548.392	2.3462	0.00274227	0.0491817	Up	7.17433	6.88629	6.62423	24.5114	12.1403	12.147														GRMZM2G022972		Zm00001d028584	GRMZM2G320960	GRMZM2G441511
Zm00001d029258	GRMZM2G046297	258.69	154.705	362.676	2.34431	9.61804e-05	0.00398575	Up	7.72386	3.19479	10.1718	21.3744	14.7243	16.633		GO:0005524,GO:0004672,GO:0004674,GO:0006468	ATP binding|protein kinase activity|protein serine/threonine kinase activity|protein phosphorylation											AC208916.3_FG003		na	GRMZM2G391908	GRMZM2G320960
Zm00001d014422	GRMZM2G180086	391.083	233.958	548.209	2.3432	1.15654e-06	9.20092e-05	Up	1.20972	1.58533	1.73234	3.16235	3.66683	3.35381														GRMZM2G408462		Zm00001d028585	GRMZM2G100086	GRMZM2G391908
Zm00001d054043	GRMZM2G415007	1886.16	1128.4	2643.91	2.34306	0.00210606	0.0409676	Up	13.994	14.2282	13.4936	48.3425	23.5253	25.4769		GO:0005524	ATP binding											GRMZM2G083328		Zm00001d028586	GRMZM2G001918	GRMZM2G100086
Zm00001d044285	GRMZM2G116584	26.6597	15.9506	37.3687	2.34277	0.0161168	0.168037	Up	0.136225	0.229483	0.124171	0.403768	0.371426	0.230693		GO:0005509	calcium ion binding											GRMZM2G447795		Zm00001d028587	GRMZM5G836424	GRMZM2G001918
Zm00001d006205	GRMZM2G073882	19.7572	11.8271	27.6872	2.34099	0.0330926	0.269843	Up	0.271116	0.216614	0.140314	0.739104	0.383337	0.503199		GO:0004252,GO:0006508	serine-type endopeptidase activity|proteolysis											GRMZM2G071288		Zm00001d028588	GRMZM5G804658	GRMZM5G836424
Zm00001d026404	GRMZM2G177412	29.8918	17.8956	41.888	2.34068	0.0146777	0.157712	Up	1.27844	1.25064	1.81754	3.54134	2.4545	2.98089														GRMZM5G812126		Zm00001d028590	GRMZM5G828820	GRMZM5G804658
Zm00001d024406	GRMZM2G138997	86.1439	51.6019	120.686	2.33879	0.00230886	0.043758	Up	0.822079	0.853211	1.24022	3.24786	1.3782	2.16867		GO:0008270,GO:0005515	zinc ion binding|protein binding											GRMZM2G171713		Zm00001d028591	GRMZM2G026911	GRMZM5G828820
Zm00001d032587	GRMZM2G388892	179.529	107.559	251.499	2.33824	0.0153713	0.163019	Up	0.570678	0.576806	0.882755	2.42612	1.05651	1.2267		GO:0003677,GO:0003899,GO:0032549,GO:0006351,GO:0005634,GO:0005829,GO:0009561	DNA binding|DNA-directed RNA polymerase activity|ribonucleoside binding|transcription, DNA-templated|nucleus|cytosol|megagametogenesis											GRMZM2G410033		na	GRMZM2G026959	GRMZM2G026911
Zm00001d043445	GRMZM2G021704	94.6159	56.7456	132.486	2.33474	0.000218032	0.00770185	Up	0.505665	0.673926	1.04437	2.08474	1.36836	1.29893		GO:0009507,GO:0016787,GO:0004151,GO:0019856,GO:0016812	chloroplast|hydrolase activity|dihydroorotase activity|pyrimidine nucleobase biosynthetic process|hydrolase activity, acting on carbon-nitrogen (but not peptide) bonds, in cyclic amides											GRMZM2G092223		na	GRMZM2G703559	GRMZM2G026959
Zm00001d052261	GRMZM2G082184	25.4306	15.2569	35.6042	2.33365	0.0266606	0.233216	Up	0.246567	0.378423	0.336082	0.569031	1.0158	0.514362		GO:0016021,GO:0006810,GO:0016020,GO:0005215	integral component of membrane|transport|membrane|transporter activity											GRMZM2G062724		Zm00001d028593	GRMZM2G337425	GRMZM2G703559
Zm00001d047796	GRMZM2G166767	1231.35	738.77	1723.93	2.33351	0.00101594	0.0242602	Up	6.79789	7.16827	14.526	30.781	17.4342	17.1235														GRMZM2G100372		Zm00001d028594	GRMZM2G408887	GRMZM2G337425
Zm00001d047436	GRMZM2G178645	2991.16	1795.86	4186.46	2.33118	0.00355354	0.0595437	Up	57.2615	36.9679	57.8614	182.078	92.3468	95.1297		GO:0016021,GO:0005524	integral component of membrane|ATP binding											#N/A		Zm00001d028596	GRMZM2G109831	GRMZM2G408887
Zm00001d003209	GRMZM2G138770	249.781	149.992	349.571	2.33059	0.0150026	0.160279	Up	2.91482	4.38221	5.11109	15.5082	6.10567	7.61624		GO:0005524	ATP binding											GRMZM2G049930		Zm00001d028596	GRMZM2G110413	GRMZM2G109831
Zm00001d045563	GRMZM2G093195	109.662	65.9179	153.406	2.32723	0.00299	0.0522779	Up	1.38118	2.04235	1.1713	4.5286	2.75112	4.52587		GO:0020037,GO:0005506,GO:0016705,GO:0055114	heme binding|iron ion binding|oxidoreductase activity, acting on paired donors, with incorporation or reduction of molecular oxygen|oxidation-reduction process											GRMZM2G468111		Zm00001d028597	GRMZM2G109885	GRMZM2G110413
Zm00001d025654	GRMZM2G169726	106.494	64.0191	148.969	2.32695	0.0181108	0.181665	Up	4.75791	2.93362	2.86824	12.7362	5.18999	6.42081														GRMZM2G326250		Zm00001d028598	GRMZM2G078164	GRMZM2G109885
Zm00001d006001	GRMZM2G052671	443.824	266.829	620.819	2.32665	6.18302e-07	5.44989e-05	Up	2.45865	3.54462	2.48029	7.10064	7.07982	5.84784		GO:0006355,GO:0003700,GO:0043565	regulation of transcription, DNA-templated|transcription factor activity, sequence-specific DNA binding|sequence-specific DNA binding											GRMZM2G169628		Zm00001d028599	GRMZM2G305526	GRMZM2G078164
Zm00001d019222	GRMZM2G107065	37.3421	22.4613	52.2229	2.32501	0.00790484	0.103919	Up	0.964656	0.906776	1.24869	2.47334	2.00465	1.75539														GRMZM2G026184		Zm00001d028601	GRMZM2G179432	GRMZM2G305526
Zm00001d005888	GRMZM2G002131	87.2057	52.4708	121.941	2.32397	0.000300138	0.00979602	Up	2.73056	2.01935	1.84785	4.79651	6.40484	4.66244		GO:0006355,GO:0005634,GO:0003700,GO:0043565	regulation of transcription, DNA-templated|nucleus|transcription factor activity, sequence-specific DNA binding|sequence-specific DNA binding											GRMZM2G174732		Zm00001d028603	GRMZM2G049159	GRMZM2G179432
Zm00001d013230	GRMZM2G090432	1785.94	1077.46	2494.42	2.31508	0.00171895	0.0352131	Up	19.8785	44.1454	22.6978	82.1362	82.4972	65.0209		GO:0020037,GO:0005506,GO:0016705,GO:0055114	heme binding|iron ion binding|oxidoreductase activity, acting on paired donors, with incorporation or reduction of molecular oxygen|oxidation-reduction process											GRMZM5G879116		Zm00001d028605	GRMZM2G350001	GRMZM2G049159
Zm00001d009090	GRMZM2G051528	40.4866	24.4261	56.5472	2.31503	0.00481646	0.0739652	Up	0.753203	0.778952	0.324425	1.39586	1.71927	1.32088		GO:0003677	DNA binding											GRMZM2G117193		Zm00001d028606	GRMZM2G174644	GRMZM2G350001
Zm00001d004075	#N/A	134.432	81.1294	187.736	2.31402	0.0128425	0.145243	Up	1.37418	1.49648	0.886028	4.79392	2.00669	2.58043		GO:0046872,GO:0016787,GO:0003993	metal ion binding|hydrolase activity|acid phosphatase activity											GRMZM2G135291		Zm00001d028608	GRMZM2G110309	GRMZM2G174644
Zm00001d013458	GRMZM2G063355	36.6891	22.143	51.2351	2.31383	0.00930203	0.116775	Up	0	0	0	0	0	0														GRMZM2G116185		Zm00001d028612	GRMZM2G087600	GRMZM2G110309
Zm00001d039643	GRMZM2G479038	1038.82	627.137	1450.5	2.3129	0.0421716	0.310089	Up	23.2787	37.6859	26.8372	43.0566	90.5462	58.9384		GO:0008152,GO:0016758	metabolic process|transferase activity, transferring hexosyl groups											AC194405.3_FG021		Zm00001d028613	GRMZM2G087459	GRMZM2G087600
Zm00001d026042	GRMZM2G113800	49.1436	29.6831	68.604	2.31121	0.0160068	0.167394	Up	0.535007	0.630768	0.595898	2.17651	1.23051	0.866523		GO:0016021,GO:0005215	integral component of membrane|transporter activity											GRMZM2G426917		Zm00001d028615	GRMZM2G112925	GRMZM2G087459
Zm00001d010970	GRMZM2G052630	527.427	318.711	736.142	2.30975	3.58641e-07	3.39853e-05	Up	0.927334	0.837515	0.712697	1.86023	1.77539	1.71718		GO:0016021,GO:0008152,GO:0050660,GO:0055114,GO:0003995,GO:0016627	integral component of membrane|metabolic process|flavin adenine dinucleotide binding|oxidation-reduction process|acyl-CoA dehydrogenase activity|oxidoreductase activity, acting on the CH-CH group of donors											GRMZM5G817559		Zm00001d028616	GRMZM2G113002	GRMZM2G112925
Zm00001d045565	GRMZM2G475293	193.898	117.279	270.518	2.30662	1.20426e-05	0.000702441	Up	7.99668	6.70035	6.21347	15.9512	18.4061	14.044		GO:0008152,GO:0016787	metabolic process|hydrolase activity											GRMZM2G112548		Zm00001d028619	GRMZM2G043030	GRMZM2G113002
Zm00001d018200	GRMZM2G154332	104.063	62.9461	145.179	2.3064	0.00558721	0.0818895	Up	1.51846	1.53346	1.70006	1.6446	1.74837	2.68659		GO:0009733	response to auxin											#N/A		Zm00001d028620	GRMZM2G160906	GRMZM2G043030
Zm00001d042747	GRMZM2G074262	323.688	196	451.376	2.30294	0.000129554	0.00513893	Up	0.71884	1.63131	1.52875	2.34084	3.32988	2.70333		GO:0005524,GO:0004672,GO:0006468	ATP binding|protein kinase activity|protein phosphorylation											GRMZM2G180330		Zm00001d028623	GRMZM5G891990	GRMZM2G160906
Zm00001d028949	GRMZM2G174896	6000.13	3634.09	8366.17	2.30214	2.55419e-05	0.0013508	Up	39.3987	31.4675	25.4645	62.3334	83.118	71.8472		GO:0005524,GO:0004672,GO:0004674,GO:0007165,GO:0006468,GO:0005829	ATP binding|protein kinase activity|protein serine/threonine kinase activity|signal transduction|protein phosphorylation|cytosol											GRMZM2G147804		Zm00001d028625	AC233935.1_FG005	GRMZM5G891990
Zm00001d044644	GRMZM2G181081	24.3951	14.7867	34.0036	2.29961	0.0210829	0.201217	Up	0.153239	0.0493287	0.0958884	0.270434	0.18849	0.136223		GO:0005524,GO:0004672,GO:0006468	ATP binding|protein kinase activity|protein phosphorylation											GRMZM2G123119		Zm00001d028627	GRMZM5G894709	AC233935.1_FG005
Zm00001d050218	AC217947.4_FG002	2150.52	1303.87	2997.17	2.29867	0.000535168	0.0152399	Up	12.3833	16.5468	18.8837	31.712	43.8028	31.1464		GO:0016491,GO:0055114,GO:0016021,GO:0005789,GO:0050660,GO:0010181,GO:0050661,GO:0003958	oxidoreductase activity|oxidation-reduction process|integral component of membrane|endoplasmic reticulum membrane|flavin adenine dinucleotide binding|FMN binding|NADP binding|NADPH-hemoprotein reductase activity											GRMZM5G865811		na	AC213668.4_FG008	GRMZM5G894709
Zm00001d002456	GRMZM2G162266	498.07	302.079	694.061	2.29762	7.11975e-07	6.15825e-05	Up	1.86097	2.22998	1.77103	4.11491	4.80918	4.41972														GRMZM2G051474		Zm00001d028630	GRMZM2G428391	AC213668.4_FG008
Zm00001d053662	GRMZM2G030265	35.1321	21.3123	48.9518	2.29688	0.00987702	0.121962	Up	0.104792	0.0990413	0.158307	0.322471	0.227539	0.16275		GO:0005975,GO:0004650,GO:0071555,GO:0005576	carbohydrate metabolic process|polygalacturonase activity|cell wall organization|extracellular region											GRMZM5G892151		Zm00001d028631	GRMZM2G428410	GRMZM2G428391
Zm00001d025021	#N/A	156.253	94.815	217.691	2.29595	4.02726e-05	0.00195697	Up	0.356998	0.413853	0.524427	0.977385	0.94573	1.04204														GRMZM2G334336		na	AC213668.4_FG007	GRMZM2G428410
Zm00001d031222	GRMZM2G310947	138.994	84.3869	193.602	2.29421	0.00938148	0.117491	Up	2.63055	1.85101	2.51594	8.9996	4.61915	4.06449		GO:0016021,GO:0005524	integral component of membrane|ATP binding											GRMZM5G852170		Zm00001d028639	GRMZM2G145275	AC213668.4_FG007
Zm00001d041534	GRMZM2G092223	25.8671	15.706	36.0283	2.29393	0.0249241	0.223914	Up	0.356795	0.237384	0.349885	1.00552	0.544033	0.579324														GRMZM2G700757		Zm00001d028641	GRMZM2G096261	GRMZM2G145275
Zm00001d033181	GRMZM2G103843	219.127	133.265	304.99	2.2886	0.0240704	0.218118	Up	1.71871	1.82123	2.25095	7.1396	3.02133	2.89658		GO:0042793,GO:0009295,GO:0009658,GO:0042644,GO:0009662	transcription from plastid promoter|nucleoid|chloroplast organization|chloroplast nucleoid|etioplast organization											GRMZM2G116238		Zm00001d028641	GRMZM5G872568	GRMZM2G096261
Zm00001d043484	#N/A	123.911	75.3839	172.437	2.28745	0.047977	0.335368	Up	1.57275	1.17982	0.0213336	1.3839	2.42105	2.31649														GRMZM2G014945		Zm00001d028642	GRMZM2G096231	GRMZM5G872568
Zm00001d046184	GRMZM2G471357	187.62	114.159	261.081	2.287	0.0214542	0.203164	Up	3.17154	7.05496	9.56642	24.1002	9.26816	16.7418		GO:0046872,GO:0020037,GO:0005576,GO:0042744,GO:0004601,GO:0006979,GO:0055114	metal ion binding|heme binding|extracellular region|hydrogen peroxide catabolic process|peroxidase activity|response to oxidative stress|oxidation-reduction process											GRMZM2G126199		Zm00001d028643	GRMZM2G048482	GRMZM2G096231
Zm00001d031384	#N/A	57.7319	35.1408	80.323	2.28575	0.00179737	0.0364027	Up	1.01237	0.453992	1.49549	2.92631	1.82611	1.59729		GO:0030247	polysaccharide binding											GRMZM2G031876		na	GRMZM2G441827	GRMZM2G048482
Zm00001d003355	GRMZM2G119967	72.6091	44.2245	100.994	2.28366	0.000852232	0.0215503	Up	4.99971	3.36956	3.71123	7.24569	7.31177	5.22333														#N/A		Zm00001d028647	GRMZM2G172574	GRMZM2G441827
Zm00001d051572	GRMZM2G069422	34.1459	20.8007	47.4911	2.28315	0.012652	0.143733	Up	0.297311	0.350916	0.293578	1.06307	0.546656	0.429299		GO:0005524	ATP binding											GRMZM2G443829		Zm00001d028649	GRMZM2G043857	GRMZM2G172574
Zm00001d043056	GRMZM2G068151	328.784	200.308	457.261	2.28279	0.00109478	0.0256296	Up	1.88079	2.39266	1.98325	6.83562	3.53065	3.48145		GO:0005524,GO:0004672,GO:0006468	ATP binding|protein kinase activity|protein phosphorylation											GRMZM2G022799		Zm00001d028651	GRMZM2G043878	GRMZM2G043857
Zm00001d006063	GRMZM2G422045	23.6918	14.4454	32.9382	2.28019	0.0287367	0.244597	Up	0.166075	0.0877672	0.0596926	0.169925	0.263981	0.306947		GO:0046856,GO:0005515,GO:0016787	phosphatidylinositol dephosphorylation|protein binding|hydrolase activity											GRMZM2G169539		na	GRMZM2G043976	GRMZM2G043878
Zm00001d016755	GRMZM2G037823	167.19	101.942	232.438	2.28011	1.51432e-05	0.000856315	Up	3.40578	3.01807	1.39426	6.54171	4.52793	6.01038														GRMZM2G031581		Zm00001d028653	GRMZM2G044027	GRMZM2G043976
Zm00001d038620	GRMZM2G014981	240.686	146.821	334.551	2.27863	0.0199929	0.193949	Up	1.80561	1.46147	0.458324	2.05094	3.09504	4.08508		GO:0016021,GO:0008152,GO:0016746	integral component of membrane|metabolic process|transferase activity, transferring acyl groups											GRMZM2G153597		Zm00001d028654	GRMZM2G044281	GRMZM2G044027
Zm00001d005343	GRMZM2G104999	760.431	463.949	1056.91	2.27808	2.06462e-07	2.12786e-05	Up	11.7499	12.8953	12.6387	36.3786	23.9199	23.9075		GO:0046872,GO:0008152,GO:0016798	metal ion binding|metabolic process|hydrolase activity, acting on glycosyl bonds											GRMZM2G475185		Zm00001d028654	GRMZM2G345330	GRMZM2G044281
Zm00001d032458	GRMZM2G181236	597.749	364.74	830.757	2.27767	0.0201021	0.194675	Up	13.0119	15.1738	16.0753	55.1492	22.7815	26.1095		GO:0020037,GO:0005506,GO:0016705,GO:0055114	heme binding|iron ion binding|oxidoreductase activity, acting on paired donors, with incorporation or reduction of molecular oxygen|oxidation-reduction process											GRMZM2G060919		Zm00001d028655	GRMZM2G157329	GRMZM2G345330
Zm00001d048461	GRMZM2G051219	292.374	178.43	406.319	2.27719	0.0255448	0.227543	Up	3.9892	2.88003	4.23526	15.3397	5.98235	5.72382		GO:0009570,GO:0009507,GO:0009941,GO:0008152,GO:0016757,GO:0004048,GO:0000162,GO:0009536	chloroplast stroma|chloroplast|chloroplast envelope|metabolic process|transferase activity, transferring glycosyl groups|anthranilate phosphoribosyltransferase activity|tryptophan biosynthetic process|plastid											GRMZM2G152901		Zm00001d028656	GRMZM2G119886	GRMZM2G157329
Zm00001d017894	GRMZM2G012213	97.5844	59.6537	135.515	2.2717	0.000297412	0.00976738	Up	1.2112	0.813084	1.55984	3.11542	2.54579	2.58829		GO:0008270,GO:0005515	zinc ion binding|protein binding											GRMZM2G166027		Zm00001d028660	GRMZM2G078052	GRMZM2G119886
Zm00001d033098	GRMZM2G012119	10045.1	6144	13946.1	2.26988	4.33586e-08	5.37434e-06	Up	222.048	203.111	239.432	601.035	516.377	519.534														#N/A		Zm00001d028661	GRMZM2G077797	GRMZM2G078052
Zm00001d012378	GRMZM2G169329	1183.1	724.174	1642.03	2.26746	0.00545944	0.0805404	Up	39.525	20.4311	47.4067	123.777	57.5198	63.7642		GO:0005886,GO:0005794,GO:0005773,GO:0010017	plasma membrane|Golgi apparatus|vacuole|red or far-red light signaling pathway											GRMZM2G073770		Zm00001d028662	GRMZM2G044237	GRMZM2G077797
Zm00001d008601	GRMZM2G176568	42.2401	25.9083	58.5719	2.26074	0.00498814	0.075722	Up	2.7086	1.64515	1.96683	6.48709	4.42056	4.2536		GO:0003677,GO:0006351,GO:0006355,GO:0005634	DNA binding|transcription, DNA-templated|regulation of transcription, DNA-templated|nucleus											GRMZM2G140752		Zm00001d028663	GRMZM2G343778	GRMZM2G044237
Zm00001d002475	GRMZM2G035719	81.4547	49.9797	112.93	2.25951	0.0165989	0.171411	Up	1.20627	0.60189	2.41693	4.45501	3.17303	2.10625		GO:0000166,GO:0003676	nucleotide binding|nucleic acid binding											GRMZM2G160719		Zm00001d028664	GRMZM2G150729	GRMZM2G343778
Zm00001d030009	GRMZM2G086869	2479.32	1521.52	3437.12	2.259	1.11217e-07	1.22155e-05	Up	57.6826	58.7976	59.5694	135.273	148.917	127.106		GO:0008152,GO:0016787	metabolic process|hydrolase activity											GRMZM2G381766		Zm00001d028665	GRMZM2G150697	GRMZM2G150729
Zm00001d032481	#N/A	38.3378	23.5348	53.1408	2.25797	0.0201796	0.195222	Up	0.360786	0.744819	1.34582	2.6665	1.42028	1.8614														#N/A		Zm00001d028667	GRMZM2G048154	GRMZM2G150697
Zm00001d028707	GRMZM2G030880	876.675	538.238	1215.11	2.25757	9.09484e-06	0.000556208	Up	14.7018	15.3243	17.2756	32.9607	42.1935	30.1299		GO:0016021	integral component of membrane											GRMZM2G073882		Zm00001d028668	GRMZM2G171232	GRMZM2G048154
Zm00001d052927	GRMZM2G327659	20.5755	12.6424	28.5086	2.255	0.0466657	0.329023	Up	0.0459177	0.141185	0.127923	0.340602	0.147098	0.21814		GO:0043531	ADP binding											GRMZM2G178753		Zm00001d028669	GRMZM2G471904	GRMZM2G171232
Zm00001d006467	GRMZM2G087254	958.099	588.842	1327.36	2.25418	0.00375458	0.0618659	Up	25.1248	23.6805	26.5552	52.2498	75.9155	45.3882		GO:0003824,GO:0008152,GO:0005623,GO:0045454,GO:0055114,GO:0016671,GO:0004604,GO:0019344,GO:0019419	catalytic activity|metabolic process|cell|cell redox homeostasis|oxidation-reduction process|oxidoreductase activity, acting on a sulfur group of donors, disulfide as acceptor|phosphoadenylyl-sulfate reductase (thioredoxin) activity|cysteine biosynthetic process|sulfate reduction											#N/A		Zm00001d028671	GRMZM2G401769	GRMZM2G471904
Zm00001d040416	GRMZM2G111014	757.97	466.061	1049.88	2.25267	0.0293061	0.248225	Up	2.43904	1.83785	4.37971	10.8493	4.18033	4.91707		GO:0003677,GO:0005524,GO:0006265,GO:0003918,GO:0005694	DNA binding|ATP binding|DNA topological change|DNA topoisomerase type II (ATP-hydrolyzing) activity|chromosome											GRMZM2G094602		Zm00001d028675	GRMZM2G026910	GRMZM2G401769
Zm00001d014993	GRMZM2G114793	3119.31	1918.44	4320.18	2.25192	0.00321183	0.0552409	Up	22.7819	27.7363	24.0614	83.4973	39.9739	44.6546	Luminal-binding protein 2 [Source:Uniprot/SWISSPROT;Acc:P24067]	GO:0005524	ATP binding											GRMZM2G033665		Zm00001d028676	GRMZM2G026654	GRMZM2G026910
Zm00001d003058	GRMZM2G147256	27.312	16.7986	37.8254	2.2517	0.0169706	0.173906	Up	0.469913	0.446693	0.159426	1.38451	0.676682	0.416781		GO:0003824,GO:0016829,GO:0006520	catalytic activity|lyase activity|cellular amino acid metabolic process											AC209206.3_FG004		Zm00001d028679	GRMZM2G338333	GRMZM2G026654
Zm00001d008196	GRMZM2G361115	30.428	18.738	42.1179	2.24772	0.0198005	0.193046	Up	1.03121	2.56417	1.25832	2.81271	4.33401	2.83732														GRMZM2G172695		Zm00001d028680	GRMZM2G042107	GRMZM2G338333
Zm00001d020425	GRMZM2G121189	24.3274	14.9856	33.6693	2.24677	0.0331342	0.26996	Up	0.508569	1.37754	1.73042	3.21294	1.89736	2.18332		GO:0046872,GO:0030001	metal ion binding|metal ion transport											GRMZM2G056369		Zm00001d028681	AC226231.2_FG002	GRMZM2G042107
Zm00001d037783	GRMZM2G328785	196.973	121.387	272.558	2.24537	3.2172e-05	0.0016241	Up	1.35411	1.48376	2.50921	4.23756	3.06345	4.17587	Putative receptor protein kinase ZmPK1 [Source:Uniprot/SWISSPROT;Acc:P17801]	GO:0016021,GO:0005524,GO:0004672,GO:0004674,GO:0048544,GO:0006468,GO:0005515	integral component of membrane|ATP binding|protein kinase activity|protein serine/threonine kinase activity|recognition of pollen|protein phosphorylation|protein binding											GRMZM2G100234		na	GRMZM2G703561	AC226231.2_FG002
Zm00001d048731	GRMZM2G037472	1246.85	768.476	1725.23	2.245	0.00401871	0.0650988	Up	7.66443	6.91741	5.57968	9.87715	18.4843	17.0332		GO:0005524,GO:0003777,GO:0007018,GO:0008017	ATP binding|microtubule motor activity|microtubule-based movement|microtubule binding											GRMZM2G097636		Zm00001d028682	GRMZM2G017103	GRMZM2G703561
Zm00001d041763	GRMZM2G083130	417.531	257.357	577.705	2.24476	0.000405533	0.0123732	Up	8.29224	9.45396	18.3317	30.7095	27.1035	19.4152		GO:0008152,GO:0016758	metabolic process|transferase activity, transferring hexosyl groups											GRMZM2G326263		Zm00001d028685	GRMZM2G396674	GRMZM2G017103
Zm00001d010945	GRMZM2G017522	66.3391	40.9226	91.7556	2.24217	0.00274959	0.0491817	Up	0.478882	1.25744	1.21701	3.35218	1.81767	1.7265		GO:0005524,GO:0004672,GO:0006468	ATP binding|protein kinase activity|protein phosphorylation											GRMZM2G478798		Zm00001d028686	GRMZM2G442277	GRMZM2G396674
Zm00001d002020	GRMZM2G059740	90.6318	55.9154	125.348	2.24174	0.00364485	0.0605259	Up	1.41402	0.915051	1.32997	4.07152	1.99884	1.87429		GO:0016021,GO:0005524,GO:0004674,GO:0004672,GO:0006468	integral component of membrane|ATP binding|protein serine/threonine kinase activity|protein kinase activity|protein phosphorylation											GRMZM2G050875		Zm00001d028687	GRMZM2G141704	GRMZM2G442277
Zm00001d034859	AC191009.3_FG004	209.876	129.575	290.177	2.23944	1.46291e-05	0.000835754	Up	9.69653	9.95238	10.0911	29.8818	18.9427	20.027														GRMZM2G052386		Zm00001d028687	GRMZM2G428096	GRMZM2G141704
Zm00001d032520	#N/A	30.0009	18.5386	41.4633	2.23659	0.0244814	0.220834	Up	0.123408	0.134202	0.162618	0.229173	0.379687	0.239703														GRMZM5G833253		Zm00001d028688	AC202101.3_FG002	GRMZM2G428096
Zm00001d028456	GRMZM2G060148	38.04	23.5063	52.5737	2.23658	0.0105467	0.127151	Up	0.509627	0.650228	0.568511	1.3341	1.32295	1.43677		GO:0015031	protein transport											GRMZM2G071390		Zm00001d028689	GRMZM2G054332	AC202101.3_FG002
Zm00001d047888	GRMZM2G177599	115.743	71.5428	159.943	2.23563	0.000195176	0.00707447	Up	9.23195	17.1083	14.4047	28.8003	33.2602	38.8577														GRMZM5G862355		Zm00001d028690	GRMZM2G352883	GRMZM2G054332
Zm00001d029652	GRMZM2G045090	1016.91	628.675	1405.14	2.23509	4.20754e-07	3.89408e-05	Up	3.71343	6.95089	4.89219	11.9036	11.2263	10.9859		GO:0003824,GO:0016787,GO:0009506,GO:0005829,GO:0017168,GO:0006751	catalytic activity|hydrolase activity|plasmodesma|cytosol|5-oxoprolinase (ATP-hydrolyzing) activity|glutathione catabolic process											GRMZM2G057093		Zm00001d028690	GRMZM5G873286	GRMZM2G352883
Zm00001d031372	GRMZM2G134205	237.604	146.932	328.277	2.23421	0.00339259	0.0573312	Up	2.54059	0.868297	2.6481	6.04483	3.38832	3.49751		GO:0005524,GO:0004672,GO:0030247,GO:0006468	ATP binding|protein kinase activity|polysaccharide binding|protein phosphorylation											GRMZM2G142390		Zm00001d028691	GRMZM2G041989	GRMZM5G873286
Zm00001d032857	GRMZM2G152901	19.3357	11.9579	26.7135	2.23397	0.0464417	0.327802	Up	0.193801	0.184216	0.232951	0.773003	0.37934	0.345242		GO:0005524,GO:0004672,GO:0006468	ATP binding|protein kinase activity|protein phosphorylation											GRMZM5G821437		Zm00001d028692	GRMZM2G043291	GRMZM2G041989
Zm00001d040850	#N/A	165.787	102.539	229.035	2.23363	0.0130494	0.146213	Up	0.357916	0.471051	0.551875	1.96211	0.670812	0.82546		GO:0003824,GO:0055114,GO:0004764,GO:0003855,GO:0050661,GO:0019632	catalytic activity|oxidation-reduction process|shikimate 3-dehydrogenase (NADP+) activity|3-dehydroquinate dehydratase activity|NADP binding|shikimate metabolic process											GRMZM2G111529		Zm00001d028692	GRMZM2G338131	GRMZM2G043291
Zm00001d003643	#N/A	556.455	344.284	768.627	2.23254	7.80121e-07	6.59142e-05	Up	3.88513	3.7546	3.55604	10.4988	7.66584	7.05617		GO:0020037,GO:0004601,GO:0006979,GO:0055114	heme binding|peroxidase activity|response to oxidative stress|oxidation-reduction process											GRMZM2G333582		Zm00001d028693	GRMZM2G042639	GRMZM2G338131
Zm00001d003797	GRMZM2G146395	65.7631	40.7634	90.7629	2.22658	0.001601	0.0334728	Up	1.45019	2.64833	3.37365	8.25855	3.4958	4.31203		GO:0009055,GO:0022900,GO:0051537,GO:0051536	electron carrier activity|electron transport chain|2 iron, 2 sulfur cluster binding|iron-sulfur cluster binding											GRMZM2G430266		Zm00001d028694	GRMZM2G042543	GRMZM2G042639
Zm00001d039095	#N/A	198.629	123.129	274.129	2.22635	0.0263388	0.231737	Up	4.89307	3.52905	1.5972	4.32146	8.29228	9.01989														GRMZM5G855994		Zm00001d028695	GRMZM2G042032	GRMZM2G042543
Zm00001d016160	GRMZM2G178356	277.221	171.856	382.587	2.22621	7.95563e-06	0.000496378	Up	1.51847	1.3351	2.20151	5.25634	3.45732	3.45433		GO:0006811,GO:0016020,GO:0055085,GO:0005216	ion transport|membrane|transmembrane transport|ion channel activity											GRMZM2G147145		Zm00001d028696	GRMZM2G338037	GRMZM2G042032
Zm00001d044253	GRMZM2G061723	377.873	234.333	521.413	2.2251	1.25594e-05	0.000731051	Up	3.49448	6.03126	6.41264	15.1393	9.70403	10.9695														GRMZM2G376085		Zm00001d028697	GRMZM2G041955	GRMZM2G338037
Zm00001d011228	GRMZM2G054900	163.356	101.365	225.347	2.22312	5.38396e-05	0.00252084	Up	1.78544	1.75078	2.59124	6.2153	3.34893	4.42931														GRMZM2G413030		Zm00001d028698	GRMZM2G109967	GRMZM2G041955
Zm00001d027996	GRMZM2G154007	102.057	63.335	140.78	2.22278	0.000303317	0.00986135	Up	1.14721	1.62821	1.54271	4.27181	2.76573	2.45469		GO:0016491,GO:0008270,GO:0055114	oxidoreductase activity|zinc ion binding|oxidation-reduction process											GRMZM2G134597		Zm00001d028699	GRMZM2G154883	GRMZM2G109967
Zm00001d032268	GRMZM2G106703	691.702	429.515	953.89	2.22085	8.01234e-07	6.72371e-05	Up	11.8838	11.7673	12.3708	29.4302	27.1104	24.0985		GO:0016021,GO:0006810	integral component of membrane|transport											GRMZM2G122073		Zm00001d028701	AC217300.3_FG004	GRMZM2G154883
Zm00001d004936	GRMZM2G132000	7877.55	4892.68	10862.4	2.22014	2.71004e-05	0.00142239	Up	161.085	261.417	156.346	382.903	486.809	406.913		GO:0005515	protein binding											GRMZM2G076723		Zm00001d028702	AC217300.3_FG005	AC217300.3_FG004
Zm00001d013136	GRMZM5G892151	36.0601	22.4069	49.7133	2.21866	0.012956	0.145752	Up	0.270117	0.529258	0.320656	0.864592	0.712257	0.65393		GO:0008270,GO:0005515	zinc ion binding|protein binding											GRMZM2G139811		Zm00001d028704	GRMZM2G052479	AC217300.3_FG005
Zm00001d002974	GRMZM2G024196	132.893	82.5895	183.197	2.21817	0.000806104	0.020762	Up	1.52139	1.20416	1.66978	4.53919	2.17408	3.19711		GO:0055085,GO:0016021	transmembrane transport|integral component of membrane											GRMZM2G480380		Zm00001d028705	GRMZM2G052581	GRMZM2G052479
Zm00001d047705	GRMZM2G057959	51.1064	31.7688	70.444	2.2174	0.00503529	0.0761879	Up	1.60445	1.52322	2.54503	3.40437	5.06616	2.14906														GRMZM2G154828		Zm00001d028706	AC202041.4_FG003	GRMZM2G052581
Zm00001d018087	GRMZM2G160231	36.908	22.947	50.8689	2.2168	0.0125621	0.143004	Up	0.677732	1.36904	0.948196	1.98906	2.391	2.25589														GRMZM2G143457		Zm00001d028707	GRMZM2G030880	AC202041.4_FG003
Zm00001d011269	GRMZM2G022402	91.3731	56.85	125.896	2.21453	0.000376009	0.0116777	Up	4.62129	2.07128	2.85643	9.22948	7.04912	6.09557		GO:0016788	hydrolase activity, acting on ester bonds											GRMZM2G055101		Zm00001d028709	GRMZM2G137839	GRMZM2G030880
Zm00001d034519	GRMZM2G062357	890.37	554.064	1226.68	2.21396	5.19812e-07	4.68591e-05	Up	7.41349	6.70695	7.47822	17.902	15.6681	13.4504		GO:0016021,GO:0003824,GO:0008152,GO:0005777,GO:0009850	integral component of membrane|catalytic activity|metabolic process|peroxisome|auxin metabolic process											GRMZM2G425719		na	AC206951.3_FG014	GRMZM2G137839
Zm00001d008294	GRMZM2G128080	165.221	102.822	227.619	2.21372	0.00758612	0.100876	Up	0.578812	0.484179	0.848758	2.19806	0.99279	0.919466		GO:0043565	sequence-specific DNA binding											GRMZM2G082184		Zm00001d028710	GRMZM5G876973	AC206951.3_FG014
Zm00001d044224	GRMZM2G022090	1128.13	702.447	1553.81	2.212	5.22188e-06	0.000342755	Up	23.5839	25.4298	17.7818	41.9852	51.0304	47.8111														GRMZM2G027688		Zm00001d028711	GRMZM2G017792	GRMZM5G876973
Zm00001d042740	GRMZM2G061289	57.9935	36.135	79.8519	2.20982	0.00333501	0.0568426	Up	0.559605	0.682535	0.729598	1.68291	1.5077	1.40058		GO:0008152,GO:0016758	metabolic process|transferase activity, transferring hexosyl groups											GRMZM2G169580		Zm00001d028712	GRMZM2G141273	GRMZM2G017792
Zm00001d018374	GRMZM5G832135	21.6911	13.5163	29.8658	2.20962	0.0402832	0.303271	Up	0.977079	0.493635	0.595459	1.80861	1.79713	0.868423														GRMZM2G171229		Zm00001d028713	GRMZM2G443265	GRMZM2G141273
Zm00001d027809	GRMZM2G123986	30.2206	18.8557	41.5855	2.20546	0.0213574	0.202592	Up	0.183433	0.28993	0.155503	0.473203	0.532486	0.387468		GO:0005515	protein binding											GRMZM2G003947		Zm00001d028714	GRMZM2G141386	GRMZM2G443265
Zm00001d019256	GRMZM2G117878	130.689	81.5527	179.825	2.20501	0.00107218	0.0252494	Up	1.67181	4.15965	2.10547	7.82106	5.03925	5.02556		GO:0008152,GO:0016758	metabolic process|transferase activity, transferring hexosyl groups											GRMZM2G434363		Zm00001d028715	GRMZM2G179411	GRMZM2G141386
Zm00001d017753	GRMZM6G220418	103.897	64.8531	142.94	2.20407	0.000415141	0.0126386	Up	0.993228	0.895687	1.20716	2.09291	1.91086	2.38673		GO:0016787	hydrolase activity											AC206332.3_FG005		Zm00001d028718	GRMZM2G179462	GRMZM2G179411
Zm00001d053018	GRMZM2G000014	126.355	78.8983	173.813	2.20299	0.000191856	0.00697958	Up	0.51552	0.757298	0.747794	1.33777	1.70822	1.31719		GO:0008270,GO:0005515	zinc ion binding|protein binding											GRMZM2G145085		Zm00001d028720	GRMZM2G319781	GRMZM2G179462
Zm00001d043963	GRMZM2G074821	89.145	55.6935	122.597	2.20127	0.0134349	0.149134	Up	3.75164	3.29587	0.614504	5.80078	6.61291	4.17697		GO:0006729,GO:0008124	tetrahydrobiopterin biosynthetic process|4-alpha-hydroxytetrahydrobiopterin dehydratase activity											GRMZM2G144407		Zm00001d028721	GRMZM2G021095	GRMZM2G319781
Zm00001d021846	AC197013.3_FG003	4446.55	2778.49	6114.61	2.20069	1.78398e-07	1.86211e-05	Up	6.93011	12.6947	7.54734	20.8632	18.5976	18.6409		GO:0046872,GO:0003824,GO:0006508,GO:0004222	metal ion binding|catalytic activity|proteolysis|metalloendopeptidase activity											GRMZM2G048801		Zm00001d028725	GRMZM2G001079	GRMZM2G021095
Zm00001d053066	GRMZM2G089317	1607.63	1004.6	2210.66	2.20054	3.26545e-07	3.13298e-05	Up	47.497	50.2786	42.29	102.276	110.791	91.26		GO:0009570,GO:0005506,GO:0009507,GO:0016226,GO:0051536,GO:0009658	chloroplast stroma|iron ion binding|chloroplast|iron-sulfur cluster assembly|iron-sulfur cluster binding|chloroplast organization											AC177897.2_FG002		Zm00001d028726	GRMZM2G073628	GRMZM2G001079
Zm00001d014291	GRMZM2G071087	774.487	483.976	1065	2.20052	0.00165492	0.0342135	Up	8.37094	10.2112	8.55199	29.5706	15.0547	15.9296		GO:0003824	catalytic activity											GRMZM2G068331		Zm00001d028726	GRMZM2G443655	GRMZM2G073628
Zm00001d013915	GRMZM2G107402	355.03	221.955	488.104	2.19912	2.21566e-05	0.0011876	Up	5.99002	4.12548	2.58673	11.7183	8.34873	7.83495		GO:0055114,GO:0050661,GO:0008883,GO:0033014	oxidation-reduction process|NADP binding|glutamyl-tRNA reductase activity|tetrapyrrole biosynthetic process											#N/A		Zm00001d028727	GRMZM2G158197	GRMZM2G443655
Zm00001d033556	GRMZM2G147145	80.0475	50.0892	110.006	2.19619	0.00101787	0.0242628	Up	0.27729	0.193083	0.291614	0.622015	0.631801	0.577986		GO:0016757,GO:0047262,GO:0071555,GO:0000139,GO:0045489	transferase activity, transferring glycosyl groups|polygalacturonate 4-alpha-galacturonosyltransferase activity|cell wall organization|Golgi membrane|pectin biosynthetic process											GRMZM2G102845		Zm00001d028728	GRMZM2G065552	GRMZM2G158197
Zm00001d045838	GRMZM2G400720	74.1225	46.3851	101.86	2.19596	0.00095012	0.0232558	Up	0.926685	0.909368	0.782342	2.67506	1.43022	1.58224		GO:0016021,GO:0005524,GO:0004672,GO:0030246,GO:0006468	integral component of membrane|ATP binding|protein kinase activity|carbohydrate binding|protein phosphorylation											GRMZM2G171934		Zm00001d028728	GRMZM2G107731	GRMZM2G065552
Zm00001d050955	GRMZM2G313750	142.283	89.0509	195.515	2.19554	0.0130358	0.146179	Up	0.124593	0.673298	0.337722	1.06427	0.567847	0.639615		GO:0000166,GO:0003676,GO:0020037,GO:0005506,GO:0016705,GO:0055114	nucleotide binding|nucleic acid binding|heme binding|iron ion binding|oxidoreductase activity, acting on paired donors, with incorporation or reduction of molecular oxygen|oxidation-reduction process											GRMZM2G026189		Zm00001d028728	GRMZM2G158261	GRMZM2G107731
Zm00001d030171	GRMZM2G304897	27.8075	17.4107	38.2043	2.1943	0.0459563	0.326221	Up	0.165904	0.506123	0.478757	1.35092	0.498205	0.709472		GO:0016021,GO:0005524,GO:0004672,GO:0004674,GO:0048544,GO:0006468,GO:0005515	integral component of membrane|ATP binding|protein kinase activity|protein serine/threonine kinase activity|recognition of pollen|protein phosphorylation|protein binding											GRMZM2G113423		Zm00001d028731	GRMZM2G107838	GRMZM2G158261
Zm00001d009702	GRMZM2G013115	193.561	121.296	265.826	2.19154	5.85465e-05	0.00268685	Up	1.27812	1.06758	1.75985	3.91516	2.56725	2.34702		GO:0005524	ATP binding											#N/A		Zm00001d028733	GRMZM2G107867	GRMZM2G107838
Zm00001d016818	#N/A	96.6482	60.5691	132.727	2.19133	0.000450377	0.013504	Up	8.9525	4.00796	10.1339	21.0376	13.0629	15.8592														#N/A		Zm00001d028735	GRMZM2G173251	GRMZM2G107867
Zm00001d022081	GRMZM2G167520	66.0316	41.4043	90.6589	2.1896	0.0252697	0.22589	Up	0.879831	0.776969	0.741354	3.09511	1.32147	1.29148		GO:0016049,GO:0010215,GO:0031225	cell growth|cellulose microfibril organization|anchored component of membrane											#N/A		Zm00001d028736	GRMZM2G024159	GRMZM2G173251
Zm00001d043662	GRMZM5G863596	953.224	597.752	1308.7	2.18936	3.3845e-07	3.22923e-05	Up	2.99937	2.33518	1.38961	5.32942	4.6293	4.41293		GO:0005975,GO:0003824,GO:0009570,GO:0005509,GO:0004556,GO:0009507,GO:0043169	carbohydrate metabolic process|catalytic activity|chloroplast stroma|calcium ion binding|alpha-amylase activity|chloroplast|cation binding											GRMZM2G375696		Zm00001d028737	GRMZM2G024440	GRMZM2G024159
Zm00001d042285	AC203535.4_FG007	77.551	48.6918	106.41	2.18538	0.000989674	0.0239604	Up	1.18235	1.03788	1.33761	3.53361	1.91146	2.38392		GO:0005524,GO:0004672,GO:0006468	ATP binding|protein kinase activity|protein phosphorylation											GRMZM2G416045		Zm00001d028740	GRMZM5G876389	GRMZM2G024440
Zm00001d025716	GRMZM2G306094	42.6002	26.7496	58.4509	2.18511	0.039383	0.298192	Up	1.33646	0.665607	1.65318	4.02182	2.15327	1.62622		GO:0003677,GO:0004527,GO:0004518	DNA binding|exonuclease activity|nuclease activity											GRMZM2G102662		Zm00001d028741	GRMZM5G847302	GRMZM5G876389
Zm00001d025025	GRMZM2G173040	617.792	387.99	847.594	2.18458	0.000144628	0.00558499	Up	12.9918	32.9547	17.4092	54.868	46.6582	37.6352		GO:0009055	electron carrier activity											GRMZM2G123986		Zm00001d028742	GRMZM2G074401	GRMZM5G847302
Zm00001d032828	GRMZM2G060742	2231.99	1403.12	3060.85	2.18147	1.93874e-07	2.00854e-05	Up	34.6176	24.2246	19.8318	61.4847	58.8422	56.9466		GO:0016021,GO:0055085	integral component of membrane|transmembrane transport											#N/A		Zm00001d028743	GRMZM2G305267	GRMZM2G074401
Zm00001d048683	GRMZM2G106377	22.5834	14.2219	30.9449	2.17587	0.0416422	0.30811	Up	0.261704	0.404675	0.397089	1.43427	0.69603	0.859049		GO:0008270,GO:0004842,GO:0016567,GO:0005515	zinc ion binding|ubiquitin-protein transferase activity|protein ubiquitination|protein binding											#N/A		Zm00001d028744	AC212219.3_FG005	GRMZM2G305267
Zm00001d002680	GRMZM2G088601	3048.57	1921.94	4175.19	2.17238	2.29021e-07	2.32922e-05	Up	21.236	17.4493	14.9122	39.8493	40.6656	36.2652		GO:0016491,GO:0055114	oxidoreductase activity|oxidation-reduction process											GRMZM2G009019		Zm00001d028745	GRMZM2G114354	AC212219.3_FG005
Zm00001d022456	GRMZM2G126261	511.416	322.487	700.346	2.1717	2.04344e-05	0.00110813	Up	10.9903	7.84913	14.5022	33.6123	21.5433	21.9633		GO:0020037,GO:0004601,GO:0006979,GO:0055114,GO:0046872	heme binding|peroxidase activity|response to oxidative stress|oxidation-reduction process|metal ion binding											GRMZM2G303118		Zm00001d028745	GRMZM5G838147	GRMZM2G114354
Zm00001d052297	GRMZM2G318033	27.9128	17.6045	38.2211	2.1711	0.0225809	0.209615	Up	0.677669	0.906542	0.460867	2.52311	1.27202	1.31581		GO:0016021	integral component of membrane											#N/A		Zm00001d028746	GRMZM5G841855	GRMZM5G838147
Zm00001d002185	GRMZM2G164277	112.416	70.96	153.872	2.16843	0.025474	0.226985	Up	0.610708	0.620617	0.595944	2.12731	0.861626	0.948795		GO:0005515	protein binding											GRMZM5G862277		Zm00001d028748	GRMZM2G380955	GRMZM5G841855
Zm00001d049375	GRMZM2G111300	857.631	541.442	1173.82	2.16795	1.34581e-06	0.000105555	Up	27.163	21.8126	27.8408	58.5525	58.7917	51.9703		GO:0016020,GO:0055085,GO:0030001,GO:0046873,GO:0016021,GO:0005385,GO:0071577	membrane|transmembrane transport|metal ion transport|metal ion transmembrane transporter activity|integral component of membrane|zinc ion transmembrane transporter activity|zinc II ion transmembrane transport											GRMZM2G117378		Zm00001d028749	AC208436.3_FG007	GRMZM2G380955
Zm00001d011835	GRMZM2G059073	488.08	308.18	667.98	2.1675	0.0244928	0.220865	Up	3.26911	3.36966	4.43692	12.9447	5.04075	5.94042		GO:0008152,GO:0006741,GO:0003951,GO:0019674	metabolic process|NADP biosynthetic process|NAD+ kinase activity|NAD metabolic process											GRMZM2G438960		Zm00001d028750	GRMZM2G053669	AC208436.3_FG007
Zm00001d003649	GRMZM2G057006	335.362	211.876	458.848	2.16564	9.7024e-06	0.0005869	Up	1.84591	1.83504	1.808	3.64692	3.80172	3.06662														GRMZM2G338056		Zm00001d028751	AC208201.3_FG003	GRMZM2G053669
Zm00001d018627	GRMZM2G135739	357.713	225.998	489.428	2.16563	0.0209542	0.200147	Up	9.22376	5.2853	12.3042	30.5554	15.2284	14.3682		GO:0016021,GO:0016020,GO:0005215,GO:0055085,GO:0022891,GO:0022857	integral component of membrane|membrane|transporter activity|transmembrane transport|substrate-specific transmembrane transporter activity|transmembrane transporter activity											GRMZM2G031257		Zm00001d028752	AC208201.3_FG002	AC208201.3_FG003
Zm00001d013430	GRMZM2G150448	37.078	23.4666	50.6894	2.16007	0.01181	0.137256	Up	0.845791	0.577843	0.341855	1.42557	1.53409	0.827595		GO:0016021,GO:0005524,GO:0004672,GO:0006468	integral component of membrane|ATP binding|protein kinase activity|protein phosphorylation											GRMZM2G057140		Zm00001d028753	AC208201.3_FG001	AC208201.3_FG002
Zm00001d026070	GRMZM2G018018	505.491	320.044	690.937	2.15888	0.00630346	0.0887083	Up	4.46683	6.47988	2.63795	14.5925	7.80836	7.79251		GO:0016021,GO:0055085	integral component of membrane|transmembrane transport											GRMZM2G121115		Zm00001d028753	GRMZM2G090025	AC208201.3_FG001
Zm00001d033787	GRMZM2G046849	11785.4	7465.5	16105.4	2.15731	0.00771727	0.101936	Up	271.505	234.21	207.858	405.169	670.748	431.067														GRMZM2G042811		Zm00001d028754	GRMZM2G459824	GRMZM2G090025
Zm00001d032719	GRMZM2G143883	85.88	54.4339	117.326	2.15539	0.00325675	0.055886	Up	0.623964	0.98515	0.623602	2.22369	1.34128	1.21843		GO:0016491,GO:0050660,GO:0016614,GO:0046577,GO:0055114,GO:0016020	oxidoreductase activity|flavin adenine dinucleotide binding|oxidoreductase activity, acting on CH-OH group of donors|long-chain-alcohol oxidase activity|oxidation-reduction process|membrane											GRMZM2G426046		Zm00001d028755	GRMZM2G094388	GRMZM2G459824
Zm00001d045336	GRMZM2G103179	551.925	349.972	753.878	2.15411	0.00161058	0.0335971	Up	9.59307	10.0386	8.24441	29.0196	15.2053	15.6001		GO:0005886,GO:0005783	plasma membrane|endoplasmic reticulum											GRMZM2G324781		Zm00001d028757	GRMZM2G087079	GRMZM2G094388
Zm00001d038862	GRMZM2G021406	789.113	500.501	1077.72	2.15329	0.0047548	0.0733836	Up	9.12827	13.2423	6.11877	17.4747	26.1133	18.6385		GO:0016799,GO:0009691	hydrolase activity, hydrolyzing N-glycosyl compounds|cytokinin biosynthetic process											#N/A		Zm00001d028757	GRMZM2G087161	GRMZM2G087079
Zm00001d030556	GRMZM5G811095	1607.78	1019.78	2195.77	2.15318	0.0251848	0.225313	Up	16.3952	54.7625	27.006	51.8944	88.7024	71.0768		GO:0016021,GO:0055085,GO:0022857	integral component of membrane|transmembrane transport|transmembrane transporter activity											GRMZM2G010664		Zm00001d028759	GRMZM2G087186	GRMZM2G087161
Zm00001d016155	GRMZM2G111529	44.0872	27.9766	60.1979	2.15172	0.00848732	0.109213	Up	0.280075	0.204734	0.299574	0.643603	0.405371	0.595294		GO:0016020,GO:0000148,GO:0003843,GO:0006075	membrane|1,3-beta-D-glucan synthase complex|1,3-beta-D-glucan synthase activity|(1->3)-beta-D-glucan biosynthetic process											GRMZM2G181566		Zm00001d028759	GRMZM2G385021	GRMZM2G087186
Zm00001d003019	GRMZM2G145045	138.025	87.5951	188.455	2.15143	0.000737576	0.019358	Up	0.426582	0.504994	0.604741	1.69714	0.880873	0.882252		GO:0005524,GO:0004672,GO:0006468,GO:0004674,GO:0005509,GO:0030247,GO:0005515	ATP binding|protein kinase activity|protein phosphorylation|protein serine/threonine kinase activity|calcium ion binding|polysaccharide binding|protein binding											GRMZM2G456669		Zm00001d028759	GRMZM5G832375	GRMZM2G385021
Zm00001d045650	GRMZM2G058407	272.844	173.172	372.516	2.15113	2.15834e-05	0.00116137	Up	14.4426	11.9464	14.9098	30.5727	32.8426	26.6557		GO:0008312,GO:0006614,GO:0048500	7S RNA binding|SRP-dependent cotranslational protein targeting to membrane|signal recognition particle											GRMZM2G338376		Zm00001d028760	GRMZM5G873359	GRMZM5G832375
Zm00001d010308	GRMZM2G016605	53.5955	34.0209	73.1702	2.15074	0.00471077	0.0729388	Up	1.38057	0.925199	1.50585	3.09763	2.7523	1.74269		GO:0008152,GO:0016787	metabolic process|hydrolase activity											GRMZM2G116584		Zm00001d028761	GRMZM5G850640	GRMZM5G873359
Zm00001d019306	GRMZM2G003789	39.4902	25.0821	53.8984	2.14888	0.00957287	0.119296	Up	0.825643	1.28629	0.683907	3.07731	1.62527	1.604		GO:0008152,GO:0016787	metabolic process|hydrolase activity											GRMZM2G331283		Zm00001d028762	GRMZM5G824405	GRMZM5G850640
Zm00001d001856	GRMZM2G068059	1031.25	655.138	1407.37	2.1482	1.32312e-06	0.000104069	Up	0.929934	1.43826	1.77566	1.32088	1.52985	1.19729		GO:0005737,GO:0008152,GO:0016226,GO:0008168,GO:0051536,GO:0046872,GO:0009055,GO:0051537,GO:0043066,GO:0005758	cytoplasm|metabolic process|iron-sulfur cluster assembly|methyltransferase activity|iron-sulfur cluster binding|metal ion binding|electron carrier activity|2 iron, 2 sulfur cluster binding|negative regulation of apoptotic process|mitochondrial intermembrane space											GRMZM2G000739		Zm00001d028765	GRMZM2G313272	GRMZM5G824405
Zm00001d020936	GRMZM2G394027	148.069	94.2148	201.924	2.14323	0.000260053	0.00876202	Up	1.96142	1.96612	1.8513	6.10031	2.8835	4.07465														GRMZM2G320287		Zm00001d028767	AC196161.3_FG002	GRMZM2G313272
Zm00001d008457	GRMZM2G079219	139.05	88.5377	189.562	2.14103	0.0072691	0.0979265	Up	1.74972	1.5241	1.67148	5.95165	2.32336	3.46211		GO:0016021,GO:0005524,GO:0004672,GO:0006468	integral component of membrane|ATP binding|protein kinase activity|protein phosphorylation											#N/A		Zm00001d028768	GRMZM2G452695	AC196161.3_FG002
Zm00001d011649	GRMZM2G010987	1854.9	1181.09	2528.7	2.14098	9.21609e-07	7.59302e-05	Up	51.0088	58.5611	61.453	134.064	138.736	108.442		GO:0008152,GO:0016758	metabolic process|transferase activity, transferring hexosyl groups											GRMZM2G071468		na	AC196161.3_FG004	GRMZM2G452695
Zm00001d026377	GRMZM5G831843	28.5081	18.1552	38.8611	2.1405	0.034151	0.274585	Up	0.909454	0.361863	1.41181	2.08179	2.23156	1.08025		GO:0016021,GO:0005215,GO:0055085,GO:0022857	integral component of membrane|transporter activity|transmembrane transport|transmembrane transporter activity											GRMZM2G122590		Zm00001d028769	GRMZM2G135456	AC196161.3_FG004
Zm00001d009975	GRMZM2G133095	23.7988	15.1602	32.4375	2.13965	0.0358623	0.282402	Up	3.31241	1.47751	1.13984	4.87259	2.70568	0.82237														GRMZM2G169198		Zm00001d028770	GRMZM2G135359	GRMZM2G135456
Zm00001d012909	GRMZM2G133407	95.8365	61.0611	130.612	2.13903	0.0307347	0.255953	Up	0.589457	1.97677	0.867748	3.51209	1.6431	2.27301		GO:0003824	catalytic activity											GRMZM2G079807		Zm00001d028771	GRMZM2G135337	GRMZM2G135359
Zm00001d034217	GRMZM2G475948	238.542	152.037	325.046	2.13794	0.0471438	0.331128	Up	5.50113	2.88059	3.17646	13.7457	5.22832	6.85054		GO:0016021,GO:0005524,GO:0004672,GO:0030246,GO:0006468	integral component of membrane|ATP binding|protein kinase activity|carbohydrate binding|protein phosphorylation											GRMZM2G158721		Zm00001d028773	GRMZM2G006085	GRMZM2G135337
Zm00001d049273	GRMZM2G047791	71.3612	45.5198	97.2025	2.13539	0.00410797	0.0661865	Up	0.745282	0.625966	0.835689	2.25497	1.13564	1.20489														GRMZM2G079082		Zm00001d028774	GRMZM2G006370	GRMZM2G006085
Zm00001d008744	GRMZM2G107639	166.141	106.109	226.174	2.13153	0.00563906	0.0821882	Up	1.60834	1.4738	1.80873	5.50155	2.96726	2.59342		GO:0016740,GO:0009058,GO:0030170,GO:0003824	transferase activity|biosynthetic process|pyridoxal phosphate binding|catalytic activity											GRMZM2G123550		Zm00001d028776	GRMZM2G307992	GRMZM2G006370
Zm00001d011474	GRMZM2G157334	2414.3	1542.76	3285.85	2.12985	6.21288e-07	5.45888e-05	Up	46.1231	59.1734	35.2468	97.4351	99.5466	100.863		GO:0005634,GO:0007264,GO:0005525,GO:0003924,GO:0006886,GO:0007165,GO:0006913	nucleus|small GTPase mediated signal transduction|GTP binding|GTPase activity|intracellular protein transport|signal transduction|nucleocytoplasmic transport											GRMZM2G138744		Zm00001d028777	GRMZM2G308034	GRMZM2G307992
Zm00001d048238	GRMZM2G091362	64.9434	41.5116	88.3752	2.12893	0.0373671	0.289216	Up	1.69683	1.41892	2.43253	6.48101	2.55916	2.77246														GRMZM2G475952		Zm00001d028778	GRMZM2G006981	GRMZM2G308034
Zm00001d049244	GRMZM2G097135	80.5397	51.5597	109.52	2.12413	0.0437835	0.315999	Up	2.28303	2.66012	1.27593	7.58394	3.70738	2.87588		GO:0005515,GO:0051087	protein binding|chaperone binding											GRMZM2G141133		Zm00001d028779	GRMZM2G007080	GRMZM2G006981
Zm00001d012816	GRMZM2G022054	1292.01	827.437	1756.58	2.12292	0.0074284	0.0994453	Up	17.1186	23.5761	15.7735	26.5088	43.6047	46.2842		GO:0016301	kinase activity											GRMZM2G376061		Zm00001d028780	GRMZM2G007206	GRMZM2G007080
Zm00001d045025	GRMZM2G127609	2356.97	1510.92	3203.02	2.11991	0.021141	0.201398	Up	16.7248	18.8827	32.6491	71.6265	34.103	35.1164		GO:0005524,GO:0005737,GO:0006457,GO:0046914,GO:1901671	ATP binding|cytoplasm|protein folding|transition metal ion binding|positive regulation of superoxide dismutase activity											GRMZM2G087753		Zm00001d028782	GRMZM2G058138	GRMZM2G007206
Zm00001d040263	GRMZM5G835235	11244.3	7208.93	15279.7	2.11956	0.00161028	0.0335971	Up	116.524	120.732	79.6552	176.279	266.863	213.374		GO:0005524,GO:0004672,GO:0004674,GO:0006468	ATP binding|protein kinase activity|protein serine/threonine kinase activity|protein phosphorylation											GRMZM2G041418		Zm00001d028783	GRMZM2G110000	GRMZM2G058138
Zm00001d017727	AC233960.1_FG002	448.511	287.648	609.374	2.11847	7.64871e-06	0.000479382	Up	10.8729	8.36646	11.3935	24.8198	22.227	19.3435		GO:0046872,GO:0016021,GO:0070469,GO:0055114,GO:0009916	metal ion binding|integral component of membrane|respiratory chain|oxidation-reduction process|alternative oxidase activity											#N/A		Zm00001d028784	GRMZM2G032182	GRMZM2G110000
Zm00001d027656	GRMZM2G339563	2009.34	1289.34	2729.35	2.11686	0.00106863	0.0251871	Up	24.7147	27.4638	24.1777	76.9613	45.5078	39.6652		GO:0016491,GO:0009507,GO:0009941,GO:0009534,GO:0051537,GO:0015996,GO:0055114,GO:0008219,GO:0010277,GO:0009908,GO:0009816,GO:0010154,GO:0032441	oxidoreductase activity|chloroplast|chloroplast envelope|chloroplast thylakoid|2 iron, 2 sulfur cluster binding|chlorophyll catabolic process|oxidation-reduction process|cell death|chlorophyllide a oxygenase [overall] activity|flower development|defense response to bacterium, incompatible interaction|fruit development|pheophorbide a oxygenase activity											GRMZM2G019799		Zm00001d028785	GRMZM2G032047	GRMZM2G032182
Zm00001d002704	GRMZM2G144153	2058.3	1320.84	2795.75	2.11664	9.91963e-07	8.10054e-05	Up	25.0138	23.9043	28.7058	61.2374	54.7238	44.1535		GO:0006979,GO:0055114,GO:0009635,GO:0004602	response to oxidative stress|oxidation-reduction process|response to herbicide|glutathione peroxidase activity											GRMZM2G041308		Zm00001d028786	GRMZM2G030016	GRMZM2G032047
Zm00001d022479	GRMZM2G105982	25.6092	16.4381	34.7803	2.11583	0.0398972	0.301305	Up	1.0387	1.41376	1.06213	3.20619	2.04303	3.06931														GRMZM2G340177		Zm00001d028787	GRMZM2G029543	GRMZM2G030016
Zm00001d026366	GRMZM2G324781	24.634	15.8125	33.4556	2.11577	0.0371468	0.28803	Up	0.137993	0.181089	0.118908	0.415332	0.175426	0.24895		GO:0005524,GO:0008270,GO:0005515	ATP binding|zinc ion binding|protein binding											GRMZM2G104829		Zm00001d028791	GRMZM2G373621	GRMZM2G029543
Zm00001d008245	GRMZM2G027728	177.48	114.028	240.932	2.11291	0.00807858	0.105526	Up	8.62537	5.20368	13.5463	26.8011	13.0487	17.7519	60S ribosomal protein L30 [Source:Uniprot/SWISSPROT;Acc:O48558]	GO:0003735,GO:0006412,GO:0005840,GO:0005622	structural constituent of ribosome|translation|ribosome|intracellular											GRMZM2G161507		Zm00001d028793	GRMZM2G144224	GRMZM2G373621
Zm00001d052937	GRMZM2G079436	92.457	59.4457	125.468	2.11064	0.0263403	0.231737	Up	0.665848	2.33101	1.05232	4.21948	2.40781	2.65476		GO:0016021	integral component of membrane											AC217499.3_FG002		Zm00001d028796	GRMZM2G066274	GRMZM2G144224
Zm00001d008271	GRMZM2G175071	256.574	165.006	348.141	2.10986	0.000305263	0.00991302	Up	1.27524	1.91419	1.95561	5.49526	3.04059	3.01271		GO:0003824,GO:0004419	catalytic activity|hydroxymethylglutaryl-CoA lyase activity											GRMZM2G327659		Zm00001d028797	GRMZM5G814718	GRMZM2G066274
Zm00001d042954	GRMZM2G349651	96.3776	62.0062	130.749	2.10865	0.0391147	0.296733	Up	9.05973	16.1274	4.21076	18.5831	24.5752	24.8172	Histone H4 [Source:Uniprot/SWISSPROT;Acc:P62787]	GO:0009507,GO:0003677,GO:0005886,GO:0005634,GO:0000786,GO:0009506,GO:0005829,GO:0005730,GO:0005774,GO:0006334,GO:0009579,GO:0046982	chloroplast|DNA binding|plasma membrane|nucleus|nucleosome|plasmodesma|cytosol|nucleolus|vacuolar membrane|nucleosome assembly|thylakoid|protein heterodimerization activity											GRMZM5G822829		Zm00001d028798	GRMZM2G365240	GRMZM5G814718
Zm00001d038221	GRMZM2G180328	116.807	75.1594	158.455	2.10825	0.0075483	0.100565	Up	6.11112	2.99884	3.65438	13.9125	8.13513	7.29195		GO:0003677,GO:0006351,GO:0006355,GO:0005634	DNA binding|transcription, DNA-templated|regulation of transcription, DNA-templated|nucleus											GRMZM2G169782		Zm00001d028799	GRMZM2G417082	GRMZM2G365240
Zm00001d013006	GRMZM2G095865	428.349	275.631	581.068	2.10813	0.0010198	0.0242628	Up	1.21969	1.04276	1.39521	3.36923	2.1811	2.12337		GO:0003677,GO:0005524,GO:0005694,GO:0006259,GO:0006265,GO:0003918,GO:0003916,GO:0009507,GO:0005739,GO:0009295,GO:0016592	DNA binding|ATP binding|chromosome|DNA metabolic process|DNA topological change|DNA topoisomerase type II (ATP-hydrolyzing) activity|DNA topoisomerase activity|chloroplast|mitochondrion|nucleoid|mediator complex											GRMZM2G011526		Zm00001d028801	GRMZM2G104373	GRMZM2G417082
Zm00001d042367	GRMZM2G103812	2952.13	1899.85	4004.41	2.10775	5.217e-05	0.00245509	Up	28.7443	53.9337	33.6442	77.2092	90.3696	82.3049		GO:0008430,GO:0005515	selenium binding|protein binding											GRMZM5G850455		Zm00001d028802	GRMZM2G104464	GRMZM2G104373
Zm00001d009960	GRMZM2G060210	45.8632	29.5166	62.2098	2.10762	0.0176476	0.178581	Up	0.515263	1.19147	1.06067	2.94574	1.65085	1.61607		GO:0016747	transferase activity, transferring acyl groups other than amino-acyl groups											GRMZM2G073823		Zm00001d028803	GRMZM2G104534	GRMZM2G104464
Zm00001d038907	GRMZM2G059939	21.6363	13.9257	29.3469	2.10739	0.0499688	0.344087	Up	1.0321	0.303955	0.474571	1.88751	1.0537	0.978984		GO:0003677,GO:0006351,GO:0006355,GO:0005634,GO:0003700	DNA binding|transcription, DNA-templated|regulation of transcription, DNA-templated|nucleus|transcription factor activity, sequence-specific DNA binding											GRMZM2G030265		Zm00001d028804	GRMZM2G153450	GRMZM2G104534
Zm00001d042275	GRMZM2G142315	1285.94	827.902	1743.98	2.10651	2.12575e-06	0.000156223	Up	27.2534	34.3756	34.4695	72.0669	68.632	65.4381														GRMZM2G047065		Zm00001d028805	GRMZM2G153531	GRMZM2G153450
Zm00001d025690	GRMZM2G025366	488.642	314.644	662.64	2.106	6.90733e-06	0.00043886	Up	2.49243	3.15647	3.65126	8.78013	6.14833	5.50793		GO:0000287,GO:0051287,GO:0055114,GO:0016616,GO:0006099,GO:0004449	magnesium ion binding|NAD binding|oxidation-reduction process|oxidoreductase activity, acting on the CH-OH group of donors, NAD or NADP as acceptor|tricarboxylic acid cycle|isocitrate dehydrogenase (NAD+) activity											GRMZM2G054093		Zm00001d028806	GRMZM2G455809	GRMZM2G153531
Zm00001d027907	#N/A	233.376	150.303	316.449	2.1054	6.90616e-05	0.00305821	Up	2.43002	3.35941	2.82374	5.52637	5.94601	5.51903														GRMZM2G019209		Zm00001d028807	GRMZM2G455828	GRMZM2G455809
Zm00001d040599	GRMZM2G142836	315.861	203.447	428.276	2.1051	0.00153232	0.032408	Up	3.28287	3.19128	3.43721	10.8098	5.15305	6.06838		GO:0051539,GO:0009435,GO:0008987	4 iron, 4 sulfur cluster binding|NAD biosynthetic process|quinolinate synthetase A activity											GRMZM2G308910		Zm00001d028808	GRMZM2G010909	GRMZM2G455828
Zm00001d032748	GRMZM2G001850	651.587	419.719	883.456	2.10487	0.00291148	0.0511952	Up	3.37833	1.97574	2.0999	7.8576	4.24723	4.13577		GO:0000166,GO:0003676	nucleotide binding|nucleic acid binding											#N/A		Zm00001d028809	GRMZM2G010545	GRMZM2G010909
Zm00001d048060	GRMZM6G310687	219.041	141.29	296.792	2.10058	5.11989e-05	0.00241758	Up	5.53341	4.88011	5.63685	13.776	8.42385	11.0399	Homocysteine S-methyltransferase 1 [Source:Uniprot/SWISSPROT;Acc:Q9FUN0]	GO:0009086,GO:0008898	methionine biosynthetic process|S-adenosylmethionine-homocysteine S-methyltransferase activity											#N/A		Zm00001d028809	GRMZM2G313934	GRMZM2G010545
Zm00001d026614	GRMZM2G008287	50.0136	32.2767	67.7505	2.09905	0.0155758	0.164439	Up	0.279449	0.419597	0.585046	1.10315	0.643066	0.552575		GO:0008168,GO:0006479	methyltransferase activity|protein methylation											GRMZM2G028713		Zm00001d028810	GRMZM2G010328	GRMZM2G313934
Zm00001d042874	GRMZM2G119300	2880.38	1859.46	3901.3	2.09808	9.97322e-07	8.11867e-05	Up	41.6744	38.8054	37.531	80.9455	89.7776	64.8637		GO:0009058,GO:0016779	biosynthetic process|nucleotidyltransferase activity											GRMZM2G018254		Zm00001d028811	GRMZM2G129302	GRMZM2G010328
Zm00001d009132	AC191069.3_FG004	49.9944	32.2847	67.7041	2.0971	0.0332738	0.270391	Up	1.77825	2.73771	2.14157	7.54359	3.18782	3.35333														GRMZM5G849971		Zm00001d028812	GRMZM2G113364	GRMZM2G129302
Zm00001d015126	GRMZM2G371167	983.722	635.568	1331.88	2.09557	2.51659e-06	0.000181489	Up	1.7176	0.589265	0	0	1.68303	1.76582														GRMZM2G339562		Zm00001d028813	GRMZM2G095043	GRMZM2G113364
Zm00001d008666	GRMZM2G083328	103.926	67.2386	140.614	2.09127	0.000755909	0.0197812	Up	0.275643	0.354442	0.376378	1.0264	0.593538	0.60739		GO:0005515	protein binding											GRMZM2G128938		Zm00001d028814	GRMZM2G112538	GRMZM2G095043
Zm00001d031979	GRMZM2G015588	38.1559	24.6969	51.6149	2.08994	0.0161129	0.168037	Up	1.87294	2.40283	2.56151	6.7152	3.77137	4.10772		GO:0046654,GO:0004150,GO:0046656,GO:0006760	tetrahydrofolate biosynthetic process|dihydroneopterin aldolase activity|folic acid biosynthetic process|folic acid-containing compound metabolic process											GRMZM2G020957		Zm00001d028815	GRMZM2G112524	GRMZM2G112538
Zm00001d051875	GRMZM2G101754	55.2736	35.7937	74.7535	2.08845	0.00739195	0.0991006	Up	0.412826	0.616975	0.706441	1.17065	1.18304	0.81476		GO:0005524,GO:0004672,GO:0004842,GO:0006468,GO:0016567	ATP binding|protein kinase activity|ubiquitin-protein transferase activity|protein phosphorylation|protein ubiquitination											GRMZM2G313761		Zm00001d028816	GRMZM2G112488	GRMZM2G112524
Zm00001d052847	GRMZM2G027972	421.21	272.864	569.555	2.08732	0.045023	0.322431	Up	2.21906	4.14679	4.35843	4.93655	10.5043	5.69245		GO:0006355,GO:0003700,GO:0043565	regulation of transcription, DNA-templated|transcription factor activity, sequence-specific DNA binding|sequence-specific DNA binding											#N/A		Zm00001d028818	GRMZM2G321753	GRMZM2G112488
Zm00001d009580	GRMZM2G413652	253.902	164.488	343.316	2.08718	5.6335e-05	0.00260055	Up	1.04464	2.27541	1.38254	4.4775	3.30298	3.51988		GO:0003924,GO:0006807,GO:0016151,GO:0016020	GTPase activity|nitrogen compound metabolic process|nickel cation binding|membrane											GRMZM2G148355		Zm00001d028819	GRMZM2G321870	GRMZM2G321753
Zm00001d003872	#N/A	23.4421	15.1943	31.6899	2.08565	0.0424299	0.310525	Up	0.261569	0.1585	0.244102	0.765787	0.260495	0.348663														AC203341.3_FG003		Zm00001d028820	GRMZM2G016734	GRMZM2G321870
Zm00001d011756	GRMZM2G166383	377.86	244.915	510.805	2.08564	1.63965e-05	0.000919693	Up	1.65023	1.57482	1.58901	3.72663	2.9332	3.0434		GO:0016021,GO:0009706,GO:0009507,GO:0009941,GO:0009536	integral component of membrane|chloroplast inner membrane|chloroplast|chloroplast envelope|plastid											GRMZM2G181081		Zm00001d028821	GRMZM2G017044	GRMZM2G016734
Zm00001d021181	GRMZM2G071147	198.788	128.873	268.702	2.08501	0.000152467	0.00581492	Up	0.648546	0.672432	1.02715	1.66749	1.68402	1.37659														#N/A		Zm00001d028822	GRMZM2G169173	GRMZM2G017044
Zm00001d005925	GRMZM2G076075	4235.05	2746.33	5723.76	2.08415	2.46104e-05	0.00130402	Up	29.1183	39.2792	48.6515	77.6991	92	66.182		GO:0006094,GO:0006096,GO:0004347	gluconeogenesis|glycolytic process|glucose-6-phosphate isomerase activity											#N/A		Zm00001d028823	GRMZM2G169167	GRMZM2G169173
Zm00001d039712	GRMZM5G831408	55.1468	35.7708	74.5228	2.08334	0.00610423	0.0867813	Up	0.620138	0.416016	0.694345	1.50334	1.0198	1.0957		GO:0003779	actin binding											GRMZM2G100727		Zm00001d028824	GRMZM2G300692	GRMZM2G169167
Zm00001d049413	GRMZM2G125151	77.4445	50.2416	104.647	2.08288	0.00754225	0.100533	Up	3.67246	1.33627	5.00237	9.69693	6.10102	5.58677														GRMZM2G136039		Zm00001d028825	GRMZM2G000632	GRMZM2G300692
Zm00001d026671	GRMZM2G177151	49.8743	32.3653	67.3832	2.08196	0.0121681	0.140286	Up	2.63967	2.46143	5.1659	10.3614	5.05892	6.51514														GRMZM2G350918		Zm00001d028826	GRMZM2G377215	GRMZM2G000632
Zm00001d019985	GRMZM2G101117	108.584	70.4665	146.702	2.08186	0.00165365	0.0342135	Up	1.70314	3.25605	4.3024	9.42637	5.5044	6.6797		GO:0016788	hydrolase activity, acting on ester bonds											GRMZM2G132032		Zm00001d028827	GRMZM2G076537	GRMZM2G377215
Zm00001d005594	#N/A	87.5182	56.7957	118.241	2.08186	0.0347286	0.277239	Up	2.41095	2.82322	2.39029	9.50309	4.43208	3.89687		GO:0016021,GO:0016020,GO:0005215,GO:0055085,GO:0022891,GO:0022857	integral component of membrane|membrane|transporter activity|transmembrane transport|substrate-specific transmembrane transporter activity|transmembrane transporter activity											GRMZM2G428027		Zm00001d028828	GRMZM2G427438	GRMZM2G076537
Zm00001d012394	GRMZM2G149317	2281.98	1484.09	3079.87	2.07526	6.77456e-05	0.00302404	Up	58.543	54.1331	46.6989	109.446	130.652	91.3893		GO:0016021,GO:0016740,GO:0009058,GO:0016765	integral component of membrane|transferase activity|biosynthetic process|transferase activity, transferring alkyl or aryl (other than methyl) groups											#N/A		Zm00001d028829	GRMZM2G427418	GRMZM2G427438
Zm00001d049286	GRMZM2G162829	94.3141	61.3774	127.251	2.07325	0.000991221	0.0239732	Up	0.787159	0.419616	0.689646	1.84639	1.17456	1.05379		GO:0016021,GO:0005524,GO:0004674,GO:0004672,GO:0006468,GO:0005515	integral component of membrane|ATP binding|protein serine/threonine kinase activity|protein kinase activity|protein phosphorylation|protein binding											GRMZM2G365768		Zm00001d028830	GRMZM2G122965	GRMZM2G427418
Zm00001d011799	GRMZM2G167758	2045.37	1331.68	2759.06	2.07187	2.5609e-06	0.000183729	Up	76.1528	82.541	85.84	167.727	176.409	174.733		GO:0005886	plasma membrane											GRMZM2G105770		Zm00001d028834	GRMZM2G036086	GRMZM2G122965
Zm00001d032652	GRMZM2G459291	802.105	522.627	1081.58	2.06951	4.14736e-06	0.000276806	Up	17.9945	18.8539	13.2894	34.132	32.4649	33.591		GO:0016787	hydrolase activity											GRMZM2G093175		Zm00001d028835	GRMZM5G807260	GRMZM2G036086
Zm00001d022257	GRMZM2G327655	101.13	65.8943	136.366	2.06947	0.000818604	0.0209682	Up	1.84645	2.3737	1.98427	6.64977	3.74644	3.94683		GO:0005515,GO:0005730,GO:0080008	protein binding|nucleolus|Cul4-RING E3 ubiquitin ligase complex											#N/A		Zm00001d028838	GRMZM5G819965	GRMZM5G807260
Zm00001d046945	GRMZM2G115660	784.154	510.983	1057.33	2.0692	0.002603	0.0474906	Up	12.2541	9.47165	12.0673	37.674	20.4951	21.4668		GO:0016021,GO:0005509	integral component of membrane|calcium ion binding											GRMZM2G021436		Zm00001d028839	GRMZM2G311465	GRMZM5G819965
Zm00001d010033	GRMZM5G898867	74.5779	48.6225	100.533	2.06763	0.00324379	0.0556982	Up	0.697063	1.08331	0.810956	1.81932	1.75991	2.14561		GO:0016021	integral component of membrane											#N/A		Zm00001d028840	GRMZM2G017536	GRMZM2G311465
Zm00001d027731	GRMZM2G076062	4896.09	3194.99	6597.19	2.06485	2.3342e-06	0.000168774	Up	29.9568	43.0437	39.8043	71.3879	87.8839	71.4291		GO:0003723	RNA binding											GRMZM2G038640		Zm00001d028841	GRMZM2G017400	GRMZM2G017536
Zm00001d018454	GRMZM5G806449	2817.11	1838.47	3795.76	2.06463	1.7752e-06	0.000135408	Up	4.24416	4.95639	4.81596	12.3314	10.2934	7.65237		GO:0016491,GO:0045454,GO:0050660,GO:0016668,GO:0055114,GO:0050661,GO:0004362,GO:0006749,GO:0005777,GO:0005623	oxidoreductase activity|cell redox homeostasis|flavin adenine dinucleotide binding|oxidoreductase activity, acting on a sulfur group of donors, NAD(P) as acceptor|oxidation-reduction process|NADP binding|glutathione-disulfide reductase activity|glutathione metabolic process|peroxisome|cell											GRMZM2G079727		Zm00001d028842	GRMZM2G057027	GRMZM2G017400
Zm00001d048741	GRMZM2G048801	425.282	277.688	572.876	2.06302	0.00055916	0.0157775	Up	0.140722	0.208798	0.132576	0.520607	0.328224	0.343611		GO:0006810,GO:0005643,GO:0005515,GO:0016021,GO:0005524,GO:0004674,GO:0004672,GO:0006468	transport|nuclear pore|protein binding|integral component of membrane|ATP binding|protein serine/threonine kinase activity|protein kinase activity|protein phosphorylation											GRMZM2G439246		Zm00001d028842	GRMZM2G084799	GRMZM2G057027
Zm00001d017709	GRMZM2G103357	102.814	67.1592	138.468	2.06179	0.00129523	0.0286779	Up	1.93801	0.881767	2.84298	4.52211	3.91967	3.65534		GO:0016021,GO:0015031	integral component of membrane|protein transport											GRMZM2G024245		Zm00001d028851	GRMZM2G016020	GRMZM2G112263
Zm00001d012571	GRMZM2G091006	81.6569	53.371	109.943	2.05997	0.00649989	0.0908251	Up	0.378159	0.50107	0.676573	1.60693	0.872636	0.853959		GO:0003677,GO:0005622,GO:0006281,GO:0004518,GO:0004519,GO:0046872,GO:0003906	DNA binding|intracellular|DNA repair|nuclease activity|endonuclease activity|metal ion binding|DNA-(apurinic or apyrimidinic site) lyase activity											GRMZM2G124276		Zm00001d028861	GRMZM2G452170	GRMZM2G357806
Zm00001d010880	GRMZM2G011491	241.063	157.56	324.565	2.05994	0.00484953	0.0743548	Up	1.45714	1.98999	1.90926	5.31011	2.80454	2.58678		GO:0005739	mitochondrion											GRMZM2G159547		Zm00001d028845	GRMZM2G335358	GRMZM2G064597
Zm00001d013033	AC210013.4_FG018	6319.44	4131.71	8507.16	2.05899	1.62326e-06	0.000124847	Up	196.616	225.208	146.337	371.893	442.52	370.28														GRMZM2G422045		Zm00001d028855	GRMZM2G066352	GRMZM2G016020
Zm00001d020852	GRMZM2G014558	9185.49	6006.55	12364.4	2.05849	0.00232396	0.0438645	Up	167.443	124.9	75.9054	228.615	308.725	229.062		GO:0016021,GO:0016020,GO:0016760,GO:0030244,GO:0071555	integral component of membrane|membrane|cellulose synthase (UDP-forming) activity|cellulose biosynthetic process|cell wall organization											GRMZM2G340139		Zm00001d028860	GRMZM2G357806	GRMZM2G066352
Zm00001d002191	GRMZM2G121070	82.8914	54.2524	111.53	2.05577	0.00232622	0.0438773	Up	2.53911	2.0079	3.00585	6.37958	6.00157	3.50381		GO:0016021,GO:0005215,GO:0055085,GO:0022857	integral component of membrane|transporter activity|transmembrane transport|transmembrane transporter activity											GRMZM5G820912		Zm00001d028842	GRMZM2G111990	GRMZM2G084799
Zm00001d015306	GRMZM2G011888	158.773	104.017	213.529	2.05282	0.00093363	0.0229603	Up	6.16364	2.51511	3.85861	9.5888	9.82592	6.9016		GO:0005975,GO:0030246,GO:0016853	carbohydrate metabolic process|carbohydrate binding|isomerase activity											GRMZM2G438121		Zm00001d028842	GRMZM2G129872	GRMZM2G111990
Zm00001d013797	GRMZM2G001631	159.915	104.773	215.056	2.05259	0.0003381	0.0107901	Up	0.549301	0.438281	0.344643	1.22969	0.642865	0.774679		GO:0004525,GO:0006396,GO:0003723,GO:0016075	ribonuclease III activity|RNA processing|RNA binding|rRNA catabolic process											GRMZM2G336783		Zm00001d028845	GRMZM2G064597	GRMZM2G129872
Zm00001d017773	GRMZM2G115701	92.5202	60.6244	124.416	2.05224	0.00235126	0.0441942	Up	1.11101	1.27472	2.07912	2.92209	3.06317	3.73815		GO:0005515	protein binding											GRMZM2G031624		Zm00001d028846	GRMZM2G112263	GRMZM2G335358
Zm00001d033167	GRMZM2G383408	1786.52	1170.86	2402.19	2.05165	2.7639e-06	0.000195764	Up	18.2366	18.3413	17.7306	38.8124	34.6998	36.3925		GO:0008152,GO:0016597	metabolic process|amino acid binding											GRMZM2G013657		Zm00001d028862	GRMZM2G021433	GRMZM2G452170
Zm00001d001984	GRMZM2G042933	91.7878	60.218	123.358	2.04852	0.00174806	0.0356612	Up	1.90498	2.74731	2.19107	5.8351	5.28163	3.40834		GO:0016021	integral component of membrane											GRMZM2G459715		Zm00001d028863	GRMZM2G022945	GRMZM2G021433
Zm00001d012744	GRMZM5G821437	31.9393	20.9568	42.9218	2.04811	0.0316727	0.261568	Up	0.244926	0.540311	0.120237	0.645197	0.400276	0.839589		GO:0016020,GO:0016760,GO:0030244	membrane|cellulose synthase (UDP-forming) activity|cellulose biosynthetic process											GRMZM2G402538		Zm00001d028863	GRMZM2G317487	GRMZM2G022945
Zm00001d032994	GRMZM2G115772	133.522	87.6176	179.427	2.04784	0.00577835	0.0836912	Up	1.03421	0.80659	0.295544	2.30345	1.10347	1.3155		GO:0016021	integral component of membrane											GRMZM5G818791		Zm00001d028866	GRMZM2G010000	GRMZM2G317487
Zm00001d016379	GRMZM2G133430	93.0765	61.081	125.072	2.04764	0.0485044	0.337646	Up	5.32581	5.79432	12.3657	33.7586	11.273	14.6161		GO:0016021	integral component of membrane											#N/A		Zm00001d028867	GRMZM2G013957	GRMZM2G010000
Zm00001d045501	GRMZM2G092797	163.676	107.485	219.866	2.04555	0.0170329	0.174187	Up	0.652967	0.752617	0.938021	2.64393	0.916947	1.48915		GO:0005515,GO:0005634	protein binding|nucleus											GRMZM2G174834		Zm00001d028868	GRMZM2G013783	GRMZM2G013957
Zm00001d013419	GRMZM2G114789	62.9433	41.3623	84.5242	2.04351	0.00573893	0.0832069	Up	1.15909	1.48785	1.59849	3.37589	2.76847	2.52678		GO:0000166,GO:0003676	nucleotide binding|nucleic acid binding											GRMZM2G069047		Zm00001d028870	GRMZM2G475971	GRMZM2G013783
Zm00001d012675	GRMZM2G116273	11001.8	7230.08	14773.5	2.04335	1.83035e-06	0.000138097	Up	80.6982	81.8417	92.1221	192.714	192.768	134.334		GO:0016740,GO:0005515	transferase activity|protein binding											GRMZM2G166671		na	AC219108.3_FG001	GRMZM2G475971
Zm00001d037242	AC202439.3_FG006	61.8493	40.6647	83.0339	2.04191	0.00447829	0.0704475	Up	1.5321	1.2678	1.12922	4.10786	2.81123	2.02002		GO:0016021,GO:0006810,GO:0016020,GO:0005215,GO:0055085,GO:0015204,GO:0071918	integral component of membrane|transport|membrane|transporter activity|transmembrane transport|urea transmembrane transporter activity|urea transmembrane transport											GRMZM2G386430		Zm00001d028873	GRMZM2G084389	AC219108.3_FG001
Zm00001d044008	GRMZM2G118369	1338.7	880.183	1797.22	2.04187	0.000611229	0.0168798	Up	3.39646	4.29555	2.47981	6.32241	7.97895	5.4801		GO:0003779	actin binding											GRMZM2G169966		Zm00001d028874	GRMZM2G383790	GRMZM2G084389
Zm00001d006351	GRMZM2G105250	66.005	43.4038	88.6061	2.04144	0.0199593	0.193886	Up	0.659869	0.271459	0.531167	1.45025	0.9227	0.623625		GO:0003676,GO:0005515	nucleic acid binding|protein binding											GRMZM2G160578		Zm00001d028875	GRMZM2G003984	GRMZM2G383790
Zm00001d051912	GRMZM2G142661	268.924	176.884	360.963	2.04068	8.1814e-05	0.00347334	Up	3.7162	6.53827	4.35297	9.92125	10.6599	8.25555		GO:0005737,GO:0005249,GO:0006813	cytoplasm|voltage-gated potassium channel activity|potassium ion transport											GRMZM2G017802		Zm00001d028878	GRMZM2G439819	GRMZM2G003984
Zm00001d003495	GRMZM2G171254	249.396	164.195	334.596	2.03779	0.000663053	0.0179082	Up	0.564291	0.659604	0.705973	1.64629	0.876219	0.915365														GRMZM2G040094		Zm00001d028879	GRMZM2G038015	GRMZM2G439819
Zm00001d017514	GRMZM2G024245	35.2366	23.2134	47.2598	2.03588	0.0425832	0.311158	Up	0.0602103	0.0437087	0.167565	0.186522	0.135818	0.211178		GO:0005515	protein binding											GRMZM2G159948		Zm00001d028880	GRMZM2G301823	GRMZM2G038015
Zm00001d019850	GRMZM2G480516	374.639	246.814	502.464	2.03581	3.71815e-05	0.00183691	Up	3.65415	5.36525	4.80408	10.5642	8.72392	9.47986		GO:0080019	fatty-acyl-CoA reductase (alcohol-forming) activity											GRMZM2G372180		Zm00001d028885	GRMZM2G179155	GRMZM2G301823
Zm00001d016230	GRMZM2G138423	410.267	270.426	550.108	2.03423	0.0001548	0.00587161	Up	2.3225	4.18855	2.45914	5.40037	6.40528	6.21342		GO:0006810,GO:0005743,GO:0005215,GO:0055085,GO:0048367,GO:0048364,GO:0005789,GO:0048316,GO:0051503,GO:0005471	transport|mitochondrial inner membrane|transporter activity|transmembrane transport|shoot system development|root development|endoplasmic reticulum membrane|seed development|adenine nucleotide transport|ATP:ADP antiporter activity											GRMZM5G833699		Zm00001d028887	GRMZM2G124785	GRMZM2G179155
Zm00001d032532	AC213521.3_FG005	1233.11	812.858	1653.37	2.03402	3.63429e-06	0.000250387	Up	17.1662	13.6282	15.505	37.2912	27.4356	29.2777		GO:0055114,GO:0006782,GO:0050661,GO:0008883,GO:0033014	oxidation-reduction process|protoporphyrinogen IX biosynthetic process|NADP binding|glutamyl-tRNA reductase activity|tetrapyrrole biosynthetic process											GRMZM2G477457		na	GRMZM5G807294	GRMZM2G124785
Zm00001d016891	GRMZM2G013079	211.462	139.426	283.497	2.03332	0.0489456	0.339386	Up	0.77704	0.629952	1.02178	2.47787	1.15099	1.00113		GO:0016020,GO:0006486,GO:0008378,GO:0016021,GO:0000139	membrane|protein glycosylation|galactosyltransferase activity|integral component of membrane|Golgi membrane											GRMZM2G085409		Zm00001d028888	GRMZM2G030036	GRMZM5G807294
Zm00001d012348	#N/A	37.8596	24.9885	50.7307	2.03017	0.0181449	0.181921	Up	2.60569	0.920865	1.75746	4.29413	2.53697	3.79405		GO:0016020,GO:0005737,GO:0006886,GO:0008565	membrane|cytoplasm|intracellular protein transport|protein transporter activity											#N/A		Zm00001d028889	GRMZM2G092442	GRMZM2G030036
Zm00001d018049	GRMZM2G130548	249.026	164.438	333.614	2.02881	0.000612108	0.0168798	Up	0.701657	0.848219	0.780493	1.42911	1.83231	1.1375		GO:0016021	integral component of membrane											GRMZM2G029716		Zm00001d028890	GRMZM2G043484	GRMZM2G092442
Zm00001d028824	GRMZM2G300692	32.6345	21.5533	43.7156	2.02826	0.0347846	0.277448	Up	1.21432	1.77466	1.51957	4.05246	3.54167	3.15425		GO:0016757	transferase activity, transferring glycosyl groups											GRMZM2G371167		Zm00001d028894	GRMZM5G824629	GRMZM2G043484
Zm00001d036181	GRMZM2G062638	67.278	44.4465	90.1096	2.02737	0.0228901	0.211275	Up	0.484448	0.541448	0.952213	1.57584	0.840502	0.908719		GO:0003677,GO:0005524,GO:0008094,GO:0006281	DNA binding|ATP binding|DNA-dependent ATPase activity|DNA repair											GRMZM2G010333		Zm00001d028895	GRMZM2G056373	GRMZM5G824629
Zm00001d029149	GRMZM2G134671	1810.36	1197.01	2423.71	2.0248	0.00509396	0.0767827	Up	27.0811	43.7206	27.167	49.9297	77.6876	68.3136		GO:0005622,GO:0008270,GO:0005515	intracellular|zinc ion binding|protein binding											#N/A		Zm00001d028896	GRMZM2G011483	GRMZM2G056373
Zm00001d006494	GRMZM2G169539	31.4111	20.797	42.0253	2.02074	0.0370716	0.287673	Up	0.288606	0.415284	0.155214	0.819595	0.568002	0.574369		GO:0016020,GO:0055085,GO:0015238,GO:0015297,GO:0006855,GO:0016021	membrane|transmembrane transport|drug transmembrane transporter activity|antiporter activity|drug transmembrane transport|integral component of membrane											GRMZM2G063355		Zm00001d028898	GRMZM2G121871	GRMZM2G011483
Zm00001d018335	GRMZM2G040890	218.898	144.984	292.813	2.01963	0.000260747	0.0087647	Up	2.78614	3.51588	4.07656	6.19565	8.23697	7.31505		GO:0019538	protein metabolic process											GRMZM2G472248		Zm00001d028899	GRMZM2G422295	GRMZM2G121871
Zm00001d052701	GRMZM2G173684	224.951	149.025	300.878	2.01897	0.00647366	0.0905042	Up	4.57843	3.71782	5.44244	15.3136	7.55162	7.46999		GO:0016021,GO:0006810	integral component of membrane|transport											#N/A		Zm00001d028900	GRMZM2G121957	GRMZM2G422295
Zm00001d010048	GRMZM2G006745	1271.47	842.797	1700.14	2.01726	0.00106765	0.0251854	Up	15.3397	17.9315	16.5194	24.9805	39.7723	32.2236		GO:0003677,GO:0006355,GO:0003700,GO:0006351,GO:0005634	DNA binding|regulation of transcription, DNA-templated|transcription factor activity, sequence-specific DNA binding|transcription, DNA-templated|nucleus											#N/A		Zm00001d028902	GRMZM2G013853	GRMZM2G121957
Zm00001d034760	GRMZM2G053458	2090.62	1386.8	2794.44	2.01502	0.000689293	0.0183668	Up	97.9482	99.817	104.224	273.355	159.701	169.027	Ferredoxin-3, chloroplastic [Source:Uniprot/SWISSPROT;Acc:P27788]	GO:0009055,GO:0022900,GO:0051537,GO:0051536	electron carrier activity|electron transport chain|2 iron, 2 sulfur cluster binding|iron-sulfur cluster binding											GRMZM2G164542		Zm00001d028902	GRMZM2G121960	GRMZM2G013853
Zm00001d045450	GRMZM5G877500	356.312	236.511	476.112	2.01306	0.0102377	0.124671	Up	5.49121	4.9433	6.04926	17.2174	9.19502	7.90561		GO:0003824,GO:0009073,GO:0016765,GO:0003866	catalytic activity|aromatic amino acid family biosynthetic process|transferase activity, transferring alkyl or aryl (other than methyl) groups|3-phosphoshikimate 1-carboxyvinyltransferase activity											AF546187.1_FG012		na	AC225345.3_FG009	GRMZM2G121960
Zm00001d038555	GRMZM2G140817	169.791	112.789	226.793	2.01078	0.000253723	0.00863313	Up	3.01511	2.46878	2.94689	7.75818	4.21338	5.40092		GO:0020037,GO:0005506,GO:0016705,GO:0004497,GO:0055114	heme binding|iron ion binding|oxidoreductase activity, acting on paired donors, with incorporation or reduction of molecular oxygen|monooxygenase activity|oxidation-reduction process											GRMZM2G069335		Zm00001d028903	GRMZM2G013639	AC225345.3_FG009
Zm00001d006903	GRMZM2G117993	108.749	72.2409	145.258	2.01074	0.00143861	0.0310606	Up	2.20383	1.99168	3.10273	4.67792	4.34433	3.96556		GO:0016021,GO:0008233,GO:0006465,GO:0005787	integral component of membrane|peptidase activity|signal peptide processing|signal peptidase complex											#N/A		Zm00001d028904	GRMZM2G069568	GRMZM2G013639
Zm00001d046005	GRMZM6G474234	617.661	410.448	824.874	2.00969	1.50748e-05	0.000855629	Up	6.48236	8.95661	7.27486	18.7647	14.1903	13.3677		GO:0016021,GO:0016757	integral component of membrane|transferase activity, transferring glycosyl groups											#N/A		Zm00001d028905	GRMZM2G124532	GRMZM2G069568
Zm00001d029932	GRMZM2G161459	290.23	192.984	387.475	2.0078	7.56661e-05	0.00327238	Up	8.13615	6.94893	6.60874	16.122	15.564	14.204		GO:0016021,GO:0006810,GO:0016020,GO:0005215,GO:0006857	integral component of membrane|transport|membrane|transporter activity|oligopeptide transport											#N/A		Zm00001d028906	GRMZM2G394203	GRMZM2G124532
Zm00001d005789	GRMZM2G057852	189.428	125.995	252.861	2.00691	0.041248	0.306935	Up	10.5247	6.62105	4.38034	9.94045	21.466	11.6783		GO:0003677,GO:0005634,GO:0000786,GO:0046982	DNA binding|nucleus|nucleosome|protein heterodimerization activity											GRMZM2G059064		Zm00001d028907	GRMZM2G394212	GRMZM2G394203
Zm00001d004768	GRMZM2G111143	396.678	263.859	529.496	2.00674	3.67499e-05	0.00181883	Up	4.53818	6.32543	5.42604	14.2935	8.46096	10.7391		GO:0004553,GO:0005975	hydrolase activity, hydrolyzing O-glycosyl compounds|carbohydrate metabolic process											GRMZM2G359033		Zm00001d028908	GRMZM2G394237	GRMZM2G394212
Zm00001d029416	GRMZM5G830250	701.926	467.212	936.639	2.00474	0.00100915	0.024196	Up	8.40493	9.34691	9.45031	26.7166	14.7706	14.9647		GO:0003824,GO:0008152,GO:0016747	catalytic activity|metabolic process|transferase activity, transferring acyl groups other than amino-acyl groups											GRMZM2G112799		Zm00001d028909	GRMZM2G033491	GRMZM2G394237
Zm00001d026022	GRMZM2G031326	184.381	122.774	245.989	2.00359	0.0420032	0.309752	Up	0.531515	0.393537	0.764477	1.52911	0.586493	0.607435		GO:0042254,GO:0005488	ribosome biogenesis|binding											GRMZM2G136372		Zm00001d028910	GRMZM2G135968	GRMZM2G033491
Zm00001d010236	GRMZM2G010348	868.666	578.568	1158.76	2.00282	8.1399e-06	0.000506736	Up	41.8575	39.9105	33.5281	91.8759	70.9104	66.8201		GO:0020037,GO:0009055,GO:0046872,GO:0005739,GO:0070469,GO:0055114	heme binding|electron carrier activity|metal ion binding|mitochondrion|respiratory chain|oxidation-reduction process											GRMZM5G898684		Zm00001d028912	GRMZM2G089720	GRMZM2G135968
Zm00001d041608	GRMZM2G045976	166.86	111.141	222.579	2.00267	0.000434895	0.0131106	Up	2.20342	3.3324	3.72176	7.95395	5.31442	5.42113		GO:0016021	integral component of membrane											GRMZM2G047613		Zm00001d022725	GRMZM5G878582	GRMZM2G089720
Zm00001d031602	GRMZM2G142383	1269.89	845.847	1693.94	2.00266	0.000252271	0.00860193	Up	9.51632	9.07258	9.50172	25.7636	15.7818	13.5341		GO:0005524,GO:0008152,GO:0016301,GO:0004849,GO:0044211,GO:0044206	ATP binding|metabolic process|kinase activity|uridine kinase activity|CTP salvage|UMP salvage											GRMZM2G401436		Zm00001d028915	AC208571.4_FG001	GRMZM5G878582
Zm00001d040783	GRMZM2G123428	200.155	133.338	266.973	2.00222	0.00274935	0.0491817	Up	9.49501	7.7662	13.9762	15.42	26.4992	14.881														GRMZM5G874112		Zm00001d028915	GRMZM2G008490	AC208571.4_FG001
Zm00001d016577	GRMZM2G111872	166.077	110.667	221.487	2.00139	0.00032901	0.0105242	Up	1.8012	2.61514	1.9811	5.13781	3.77616	3.20228		GO:0046872,GO:0030001	metal ion binding|metal ion transport											#REF!		Zm00001d028915	GRMZM2G329040	GRMZM2G008490
Zm00001d023924	#N/A	34.0549	0	68.1097	Inf	9.79136e-09	1.42334e-06	Up	0	0	0	22.4385	5.7276	21.9627
Zm00001d002984	GRMZM2G035755	313.299	0	626.598	Inf	5.19328e-08	6.21515e-06	Up	0	0	0	13.2181	38.0636	10.4086		GO:0008152,GO:0016758	metabolic process|transferase activity, transferring hexosyl groups											GRMZM2G012119		Zm00001d027231	GRMZM2G059865	v3 gene ID
Zm00001d023769	GRMZM2G169261	27.8855	0	55.7709	Inf	0.00110282	0.0256877	Up	0	0	0	7.00496	1.27666	1.81143		GO:0016021,GO:0006629,GO:0055114,GO:0016717	integral component of membrane|lipid metabolic process|oxidation-reduction process|oxidoreductase activity, acting on paired donors, with oxidation of a pair of donors resulting in the reduction of molecular oxygen to two molecules of water											GRMZM2G453805		na	GRMZM5G888250	GRMZM2G059865
Zm00001d016637	GRMZM2G449447	3.69899	0	7.39798	Inf	0.00734701	0.0986467	Up	0	0	0	3.81987	1.51479	0.504069														GRMZM2G144653		na	GRMZM2G093399	GRMZM5G888250
Zm00001d037298	GRMZM2G050748	13.9808	0	27.9617	Inf	0.000219558	0.00772627	Up	0	0	0	3.35378	0.98577	1.05565		GO:0008152,GO:0016758	metabolic process|transferase activity, transferring hexosyl groups											GRMZM2G028556		Zm00001d027239	GRMZM5G833153	GRMZM2G093399
Zm00001d018340	GRMZM2G080843	55.9006	0	111.801	Inf	1.07198e-11	2.83462e-09	Up	0	0	0	3.16305	1.24174	1.45298		GO:0016021	integral component of membrane											GRMZM2G046849		Zm00001d027240	GRMZM2G306216	GRMZM5G833153
Zm00001d003447	GRMZM2G065157	5.18291	0	10.3658	Inf	0.00701251	0.095536	Up	0	0	0	3.06436	0	0														GRMZM2G154881		Zm00001d027243	AC177838.2_FG015	GRMZM2G306216
Zm00001d018210	GRMZM2G084116	27.2074	0	54.4148	Inf	1.79433e-17	1.21511e-14	Up	0	0	0	2.86582	1.75035	1.69171														GRMZM2G465226		Zm00001d027248	GRMZM2G023863	AC177838.2_FG015
Zm00001d039795	GRMZM2G445261	3.77493	0	7.54987	Inf	0.0293233	0.248258	Up	0	0	0	2.29976	0.329124	0.165007		GO:0008152,GO:0016787	metabolic process|hydrolase activity											GRMZM2G132000		Zm00001d027249	GRMZM2G023794	GRMZM2G023863
Zm00001d043350	GRMZM2G033359	10.5863	0	21.1725	Inf	0.0245596	0.221395	Up	0	0	0	1.6677	0.091776	0.307781														AC210013.4_FG018		na	GRMZM5G815900	GRMZM2G023794
Zm00001d048281	GRMZM2G100750	12.6641	0	25.3282	Inf	0.00714367	0.0968004	Up	0	0	0	1.58485	0.337664	0.166631														GRMZM2G117971		na	GRMZM5G844065	GRMZM5G815900
Zm00001d052585	GRMZM2G129249	6.51494	0	13.0299	Inf	0.000312197	0.0101145	Up	0	0	0	1.46581	0.619154	0.299568														GRMZM2G018579		na	GRMZM5G866457	GRMZM5G844065
Zm00001d029703	GRMZM2G480439	7.466	0	14.932	Inf	1.72703e-05	0.00095902	Up	0	0	0	1.12583	0.462912	0.641879		GO:0005515	protein binding											GRMZM2G308687		na	GRMZM5G822187	GRMZM5G866457
Zm00001d002124	GRMZM2G352359	11.9257	0	23.8513	Inf	1.36829e-08	1.95828e-06	Up	0	0	0	1.07557	0.170393	0.299093		GO:0005618,GO:0004857,GO:0042545,GO:0030599	cell wall|enzyme inhibitor activity|cell wall modification|pectinesterase activity											GRMZM2G475059		na	GRMZM5G872839	GRMZM5G822187
Zm00001d038316	AC208916.3_FG003	3.3639	0	6.72779	Inf	0.00840011	0.108519	Up	0	0	0	1.03137	0.221299	0.22103														GRMZM2G330635		na	GRMZM5G899414	GRMZM5G872839
Zm00001d053415	GRMZM2G153597	4.04884	0	8.09768	Inf	0.00208274	0.0406662	Up	0	0	0	0.799539	0	0.280529														GRMZM2G053458		na	GRMZM2G104572	GRMZM5G899414
[truncated: 788 more rows]

## Sheet: Table S3
Supplemental Table 3. List of Up- and Down-regulated genes in pRbcS:AtSAT1-pRbcS:EcPAPR mature leaves.
[truncated: 3,111 more rows]

[truncated: 5 more sheets: Table S4, Table S5, Table S6, Table S7, Table S8]
